# Supplementary material for: Exploration of ovine milk whey proteome during postnatal development using an iTRAQ approach
Source: PeerJ. 2020 Oct 8;8:e10105. doi: 10.7717/peerj.10105 (PMC7548079; doi:10.7717/peerj.10105)
Supplement: Supplemental Information 1 [file peerj-08-10105-s001.xlsx]

## Sheet: Sheet1
Accession	Description	Coverage	# Proteins	# Unique Peptides	# Peptides	# PSMs	3d/0d	3d/0d Count	3d/0d Variability [%]	7d/0d	7d/0d Count	7d/0d Variability [%]	14d/0d	14d/0d Count	14d/0d Variability [%]	28d/0d	28d/0d Count	28d/0d Variability [%]	56d/0d	56d/0d Count	56d/0d Variability [%]	# AAs	MW [kDa]	calc. pI
G3LUQ4	Alpha s1 casein OS=Ovis aries GN=CSN1S1 PE=4 SV=1 - [G3LUQ4_SHEEP]	67.76	4	1	15	2144	3.96651	1		1.24432	1		0.650191	1		7.01057	1		0.672417	1		214	24.2883	5.42725
P04654	Alpha-S2-casein OS=Ovis aries GN=CSN1S2 PE=2 SV=1 - [CASA2_SHEEP]	67.26	3	1	21	1558	3.47033	2	1.94873	2.07223	2	7.73181	2.16265	2	10.7202	3.12927	2	13.2675	1.82671	2	12.8418	223	26.3153	7.85498
W5Q6B8	Uncharacterized protein (Fragment) OS=Ovis aries PE=3 SV=1 - [W5Q6B8_SHEEP]	1.69	4	1	1	1	3.30042	1		1.9941	1		1.75285	1		1.97038	1		3.02786	1		534	57.2708	8.30908
W5PF70	Uncharacterized protein (Fragment) OS=Ovis aries GN=BOD1L1 PE=4 SV=1 - [W5PF70_SHEEP]	0.24	1	1	1	1	3.19409	1		1.25009	1		4.05444	1		4.30553	1		4.5831	1		2919	311.606	5.18604
W5NQP5	Superoxide dismutase [Cu-Zn] OS=Ovis aries GN=SOD3 PE=3 SV=1 - [W5NQP5_SHEEP]	5.33	1	1	1	1	2.72111	1		1.93735	1		1.99646	1		2.36834	1		2.20229	1		244	26.435	6.78564
W5NXZ8	Uncharacterized protein (Fragment) OS=Ovis aries GN=GPRIN1 PE=4 SV=1 - [W5NXZ8_SHEEP]	0.87	1	1	1	1	2.28458	1		3.38167	1		4.35501	1		11.4049	1		10.4106	1		920	94.0228	5.77002
E7BQS5	Alpha-s2-casein OS=Ovis aries GN=CSN1S2 PE=2 SV=1 - [E7BQS5_SHEEP]	69.51	3	2	22	1613	2.27906	52	51.3067	2.2073	52	61.7213	2.23503	52	52.3405	6.29739	52	77.7351	3.2759	52	62.1009	223	26.2953	7.86963
W5NUD7	Uncharacterized protein OS=Ovis aries GN=LOC101113398 PE=4 SV=1 - [W5NUD7_SHEEP]	3.47	1	1	1	1	2.14656	1		1.50487	1		2.27065	1		1.4159	1		2.22274	1		375	39.2155	8.1333
W5QB61	Peptidyl-prolyl cis-trans isomerase (Fragment) OS=Ovis aries GN=FKBP1A PE=4 SV=1 - [W5QB61_SHEEP]	13.59	1	1	1	1	2.12823	1		1.84849	1		0.994437	1		0.685541	1		0.70341	1		103	11.3889	9.37842
W5QDQ1	Uncharacterized protein OS=Ovis aries GN=C1orf94 PE=4 SV=1 - [W5QDQ1_SHEEP]	2.02	1	1	1	4	2.0316	4	15.9305	1.53123	4	12.4074	2.13948	4	27.636	2.48921	4	39.6457	2.74406	4	39.6769	595	64.733	9.24658
W5P0Q4	Uncharacterized protein (Fragment) OS=Ovis aries GN=HP PE=3 SV=1 - [W5P0Q4_SHEEP]	21.15	1	7	7	9	1.95003	9	53.0896	2.51364	9	56.8552	1.61014	9	37.224	1.01369	9	16.344	0.794581	9	42.1463	416	46.2164	8.29443
Q9GK30	Parathyroid hormone-related protein (Fragment) OS=Ovis aries GN=PTHLH PE=2 SV=1 - [PTHR_SHEEP]	6.61	2	1	1	1	1.92019	1		1.21139	1		1.70186	1		1.74934	1		3.10028	1		121	13.6493	9.84717
E7BQS2	Alpha-s2-casein OS=Ovis aries GN=CSN1S2 PE=2 SV=1 - [E7BQS2_SHEEP]	65.47	2	1	20	1568	1.91348	50	15.9461	1.74278	50	23.5187	2.50324	50	22.8223	4.95899	50	24.2862	2.7778	50	18.5192	223	26.3483	8.42627
A5YBU9	Complement factor B OS=Ovis aries GN=CFB PE=3 SV=1 - [A5YBU9_SHEEP]	1.18	2	1	1	1	1.91108	1		1.11161	1		1.51005	1		1.37899	1		1.39371	1		761	85.319	7.86963
W5PJG0	Serum amyloid A protein OS=Ovis aries GN=LOC105601867 PE=3 SV=1 - [W5PJG0_SHEEP]	23.08	2	1	4	17	1.90632	1		0.615086	1		0.483368	1		0.672058	1		0.500267	1		130	14.4692	8.67529
Q9XSY9	Osteopontin OS=Ovis aries GN=SPP1 PE=2 SV=1 - [OSTP_SHEEP]	21.22	3	6	6	28	1.90475	28	39.742	1.82154	28	32.8026	2.73913	28	47.2292	5.20649	28	80.5469	3.70639	28	54.1725	278	31.0335	4.53857
W5Q160	Uncharacterized protein OS=Ovis aries GN=KRT10 PE=3 SV=1 - [W5Q160_SHEEP]	8.81	1	4	4	7	1.89597	7	17.8238	1.23272	7	12.6301	1.47524	7	34.9604	1.6772	7	12.7666	2.09563	7	34.2958	545	57.2477	5.50342
W5P3H7	Uncharacterized protein (Fragment) OS=Ovis aries GN=CNDP1 PE=4 SV=1 - [W5P3H7_SHEEP]	1.74	1	1	1	1	1.84434	1		1.75863	1		2.90288	1		2.57623	1		3.09533	1		516	57.3315	5.69385
W5Q5A6	Uncharacterized protein OS=Ovis aries GN=FGG PE=4 SV=1 - [W5Q5A6_SHEEP]	8.29	1	4	4	12	1.82928	12	17.4598	2.55002	12	40.4797	2.45692	12	48.7324	1.32014	12	30.4898	1.24133	12	37.6973	434	49.2477	6.12549
W5NRG7	Uncharacterized protein OS=Ovis aries GN=ITIH4 PE=4 SV=1 - [W5NRG7_SHEEP]	6.76	1	6	6	7	1.80504	7	17.2356	1.70113	7	7.52239	1.15859	7	46.8923	0.955282	7	25.095	0.739481	7	11.6182	917	101.751	6.40479
W5PBZ7	Protein YIPF OS=Ovis aries GN=YIPF3 PE=3 SV=1 - [W5PBZ7_SHEEP]	2.88	1	1	1	1	1.78953	1		0.994588	1		1.54963	1		1.18575	1		1.12314	1		347	37.6044	6.3667
W5P7S6	Alpha-1-acid glycoprotein OS=Ovis aries GN=LOC101103947 PE=3 SV=1 - [W5P7S6_SHEEP]	11.39	1	3	3	9	1.7746	9	15.4592	2.10603	9	5.25905	1.88858	9	17.9387	0.914598	9	6.83	0.895717	9	20.5646	202	23.2405	5.31299
W5NQ46	Fibrinogen beta chain OS=Ovis aries GN=FGB PE=4 SV=1 - [W5NQ46_SHEEP]	14.37	3	7	7	14	1.75156	14	18.2296	1.97172	14	17.2755	2.11933	14	25.6493	1.313	14	21.7534	1.14624	14	20.2007	494	56.6047	7.72314
Q9MZY2	Airway lactoperoxidase OS=Ovis aries PE=1 SV=1 - [Q9MZY2_SHEEP]	23.17	2	17	17	63	1.73391	63	22.5223	1.54749	63	28.9816	2.33651	63	47.0927	1.69841	63	29.6183	1.86053	63	42.1683	712	80.4361	8.68994
W5PNC9	Uncharacterized protein OS=Ovis aries GN=AIM1 PE=4 SV=1 - [W5PNC9_SHEEP]	0.86	1	1	1	2	1.73202	2	43.4237	1.5417	2	30.7102	2.64031	2	14.9501	3.34031	2	61.9959	3.22714	2	69.4163	1623	178.258	5.71924
W5P408	Syndecan OS=Ovis aries GN=SDC2 PE=3 SV=1 - [W5P408_SHEEP]	10.89	1	2	2	4	1.72619	4	12.4695	1.75106	4	38.6736	1.67223	4	39.3737	1.43838	4	12.0761	1.3766	4	11.6886	202	22.0209	4.71631
E7BQS3	Alpha-s2-casein OS=Ovis aries GN=CSN1S2 PE=2 SV=1 - [E7BQS3_SHEEP]	62.78	3	1	20	1434	1.70917	1		1.60814	1		0.636971	1		1.09592	1		0.738781	1		223	26.3443	8.17725
W5Q124	Uncharacterized protein OS=Ovis aries GN=LOC101119509 PE=3 SV=1 - [W5Q124_SHEEP]	7.91	1	1	4	17	1.68358	2	10.5163	1.93574	2	0.828812	1.89341	2	2.65176	1.32434	2	4.04728	1.24722	2	13.5975	417	46.5723	5.73193
W5QGB5	Histone H4 OS=Ovis aries GN=LOC101123670 PE=3 SV=1 - [W5QGB5_SHEEP]	9.71	10	1	1	1	1.67885	1		1.302	1		0.775717	1		0.810885	1		0.90088	1		103	11.3604	11.356
W5QC31	Uncharacterized protein OS=Ovis aries GN=FOXRED2 PE=4 SV=1 - [W5QC31_SHEEP]	1.59	1	1	1	1	1.6784	1		1.05246	1		1.14448	1		1.34677	1		1.50595	1		690	78.0224	7.51807
W5P7W0	Uncharacterized protein OS=Ovis aries GN=SDF4 PE=4 SV=1 - [W5P7W0_SHEEP]	4.21	2	1	1	1	1.65611	1		1.57715	1		1.14971	1		1.30877	1		1.1049	1		309	35.3355	5.13525
Q49JI4	Luteinizing hormone beta-subunit (Fragment) OS=Ovis aries PE=3 SV=1 - [Q49JI4_SHEEP]	14.46	3	1	1	2	1.62368	2	1.90083	1.60032	2	11.8313	1.16175	2	54.1955	1.52478	2	51.3911	1.48832	2	59.1596	83	9.13274	8.29443
Q30DP5	Trefoil factor 3 (Fragment) OS=Ovis aries GN=TFF3 PE=2 SV=1 - [Q30DP5_SHEEP]	36.36	2	1	1	3	1.6168	3	2.76943	1.22274	3	61.6831	0.918534	3	23.9289	1.16283	3	30.5575	0.694072	3	1.77318	44	4.65499	4.61475
W5PID9	Uncharacterized protein OS=Ovis aries GN=C9 PE=4 SV=1 - [W5PID9_SHEEP]	11.68	1	5	5	9	1.60595	9	25.7538	1.32631	9	30.4746	1.58067	9	18.2503	1.86819	9	25.1655	1.5955	9	20.7883	548	61.9005	5.99854
W5Q5H8	Fibrinogen alpha chain OS=Ovis aries GN=FGA PE=4 SV=1 - [W5Q5H8_SHEEP]	21.8	1	18	18	44	1.59737	44	22.8158	1.89009	44	40.5812	1.91826	44	35.5382	1.31991	44	34.2764	1.24348	44	26.8179	812	89.2178	6.26514
W5Q0X5	Uncharacterized protein OS=Ovis aries GN=LOC101115576 PE=3 SV=1 - [W5Q0X5_SHEEP]	14.34	1	1	4	17	1.59203	2	40.6952	1.51621	2	12.8189	1.61911	2	8.06582	1.26681	2	26.7742	1.3322	2	38.1579	279	31.7686	5.94775
P42819	Serum amyloid A protein OS=Ovis aries GN=SAA1 PE=1 SV=1 - [SAA_SHEEP]	32.14	2	1	4	21	1.59069	7	17.2106	1.23539	7	38.3044	0.9882	7	10.3199	1.29055	7	6.41314	1.24122	7	42.7719	112	12.6801	6.56592
W5PG78	Uncharacterized protein (Fragment) OS=Ovis aries GN=HCN2 PE=4 SV=1 - [W5PG78_SHEEP]	2.49	1	1	1	1	1.57047	1		1.23768	1		1.30059	1		0.912713	1		1.05659	1		885	96.5844	9.24658
C6ZP47	I alpha globin OS=Ovis orientalis musimon GN=HBAI PE=3 SV=1 - [C6ZP47_OVIMU]	20.42	6	3	3	6	1.53713	4	29.5453	0.631812	4	97.3752	0.643054	4	61.8385	0.743635	4	46.5542	0.924439	4	24.9958	142	15.1689	8.67529
W5PY10	Uncharacterized protein (Fragment) OS=Ovis aries GN=MUC15 PE=4 SV=1 - [W5PY10_SHEEP]	8.77	1	3	3	12	1.52038	12	55.9159	1.72399	12	47.6623	2.25651	12	42.6648	2.83722	12	57.073	3.05784	12	41.98	342	37.2257	5.87158
W5PW05	Uncharacterized protein OS=Ovis aries GN=MDH2 PE=3 SV=1 - [W5PW05_SHEEP]	3.21	1	1	1	1	1.50859	1		1.06334	1		0.65559	1		0.363613	1		0.40425	1		405	42.1728	7.95752
W5QD52	Alpha-lactalbumin OS=Ovis aries GN=LALBA PE=3 SV=1 - [W5QD52_SHEEP]	41.55	1	1	7	461	1.48671	200	16.7624	1.30429	200	18.2801	1.93078	200	21.5996	2.36543	200	23.495	1.4706	200	18.8471	142	16.244	5.30029
W5P737	Uncharacterized protein (Fragment) OS=Ovis aries GN=BPIFB3 PE=4 SV=1 - [W5P737_SHEEP]	1.68	1	1	1	19	1.48662	19	13.1218	1.33637	19	38.2296	2.13247	19	24.4748	2.59133	19	35.8238	2.93748	19	35.4358	476	49.9106	6.80029
W5PRG8	Uncharacterized protein OS=Ovis aries GN=CREG1 PE=4 SV=1 - [W5PRG8_SHEEP]	7.14	1	2	2	2	1.48389	2	7.25667	1.42353	2	6.46713	1.3947	2	23.744	1.11458	2	2.63367	1.22046	2	3.52123	252	27.1186	6.97607
W5PYA9	Uncharacterized protein OS=Ovis aries GN=UBTFL1 PE=4 SV=1 - [W5PYA9_SHEEP]	2.05	1	1	1	1	1.48179	1		1.81752	1		0.748337	1		1.03633	1		0.622871	1		390	46.1963	9.23193
W5NQQ0	Uncharacterized protein OS=Ovis aries GN=SRPX PE=4 SV=1 - [W5NQQ0_SHEEP]	2.58	1	1	1	1	1.47937	1		1.58106	1		2.00224	1		2.7534	1		2.6676	1		465	51.7361	8.33838
W5NXP6	Uncharacterized protein OS=Ovis aries GN=LOC101111946 PE=4 SV=1 - [W5NXP6_SHEEP]	21.31	1	2	3	8	1.47616	5	56.6693	1.53168	5	63.854	1.31589	5	26.5411	1.48295	5	10.7568	1.4884	5	20.652	122	14.1242	5.12256
Q29524	Lipoprotein lipase OS=Ovis aries GN=LPL PE=2 SV=1 - [LIPL_SHEEP]	13.6	3	6	6	39	1.47116	37	22.6922	1.11553	37	19.9727	1.53971	37	25.5147	2.05512	37	26.506	1.85619	37	24.8083	478	53.5541	8.66064
W5QA36	Uncharacterized protein OS=Ovis aries GN=LCTL PE=3 SV=1 - [W5QA36_SHEEP]	4.06	1	1	1	1	1.46792	1		0.278535	1		0.273046	1		0.219402	1		0.281854	1		567	64.8294	7.35693
W5P6W8	Uncharacterized protein OS=Ovis aries GN=LOC101115603 PE=3 SV=1 - [W5P6W8_SHEEP]	6.25	1	1	1	1	1.46468	1		1.76081	1		2.77161	1		3.03995	1		4.3191	1		336	38.3624	8.83643
P02075	Hemoglobin subunit beta OS=Ovis aries GN=HBB PE=1 SV=2 - [HBB_SHEEP]	19.31	15	3	3	4	1.44488	4	14.4886	0.396652	4	15.154	0.317819	4	70.7128	0.418379	4	70.5015	0.54901	4	63.2259	145	16.0633	7.29834
W5NWF7	Elongation factor Tu (Fragment) OS=Ovis aries GN=TUFM PE=3 SV=1 - [W5NWF7_SHEEP]	3.62	1	1	1	1	1.44016	1		1.50446	1		1.38702	1		1.94848	1		2.02137	1		414	45.4276	6.53662
W5Q0L1	Uncharacterized protein OS=Ovis aries GN=EEF1G PE=4 SV=1 - [W5Q0L1_SHEEP]	1.25	1	1	1	1	1.43819	1		1.0385	1		0.719129	1		0.688933	1		0.958578	1		558	63.3811	8.42627
W5PTS4	Uncharacterized protein OS=Ovis aries GN=RNASE4 PE=3 SV=1 - [W5PTS4_SHEEP]	33.33	1	3	3	8	1.43054	8	14.4888	1.53837	8	35.4965	2.15806	8	23.4338	2.19589	8	43.7543	2.54089	8	51.4398	147	16.8413	9.01221
B5B304	Complement factor H (Fragment) OS=Ovis aries GN=CFH PE=2 SV=1 - [B5B304_SHEEP]	8.85	1	1	1	1	1.42245	1		0.666742	1		1.02565	1		0.791101	1		0.694358	1		113	13.1985	8.25049
W5PMH6	Uncharacterized protein (Fragment) OS=Ovis aries GN=LCN2 PE=3 SV=1 - [W5PMH6_SHEEP]	34.5	1	6	6	58	1.41762	58	29.0742	1.17161	58	21.3164	1.8915	58	31.6916	2.23072	58	34.8278	2.18036	58	34.6301	200	23.073	9.51025
W5P1C2	Uncharacterized protein OS=Ovis aries GN=NUCB2 PE=4 SV=1 - [W5P1C2_SHEEP]	6.58	1	3	3	4	1.40874	4	7.78766	1.14154	4	14.6075	1.42049	4	19.8548	1.72826	4	29.4795	1.58158	4	32.6652	441	52.4374	5.14795
W5P559	Uncharacterized protein (Fragment) OS=Ovis aries PE=4 SV=1 - [W5P559_SHEEP]	25.17	1	3	3	5	1.40635	5	4.0315	1.19259	5	13.8691	1.23727	5	12.7306	3.28168	5	41.2244	1.40135	5	15.3469	143	15.4421	8.89502
W5P2K5	Uncharacterized protein OS=Ovis aries PE=4 SV=1 - [W5P2K5_SHEEP]	2.27	2	1	1	2	1.4023	2	16.6113	1.33644	2	13.9482	1.68239	2	16.6075	1.63654	2	15.3965	2.54031	2	14.5669	396	43.9181	5.21143
W5PE92	Uncharacterized protein OS=Ovis aries GN=GRN PE=4 SV=1 - [W5PE92_SHEEP]	3.06	1	2	2	2	1.3881	2	15.331	1.18918	2	66.7211	1.33655	2	22.0267	1.42847	2	22.7614	1.52415	2	39.3733	588	62.6735	6.68311
W5PWS5	Uncharacterized protein OS=Ovis aries GN=DNAH3 PE=4 SV=1 - [W5PWS5_SHEEP]	0.15	1	1	1	1	1.38753	1		1.46345	1		2.01011	1		2.23743	1		2.7366	1		4069	466.263	5.77002
W5PU70	Uncharacterized protein OS=Ovis aries GN=MUC16 PE=4 SV=1 - [W5PU70_SHEEP]	0.82	1	3	3	4	1.3861	4	32.9801	1.83227	4	20.8158	2.09267	4	10.9169	2.04954	4	8.89293	2.51551	4	4.4279	4781	503.155	5.49072
Q6IEB0	Putative ISG12(A) protein (Fragment) OS=Ovis aries GN=isg12(a) PE=2 SV=1 - [Q6IEB0_SHEEP]	13.16	1	1	1	1	1.38497	1		1.59282	1		2.73642	1		3.23281	1		2.23081	1		152	13.9166	10.3013
W5Q6L8	Uncharacterized protein OS=Ovis aries GN=KRT14 PE=3 SV=1 - [W5Q6L8_SHEEP]	4.13	11	2	2	3	1.38344	3	49.4655	1.36082	3	2.94028	1.44751	3	60.412	1.61286	3	47.9301	2.40956	3	50.9727	436	48.6051	5.26221
Q009B1	ATP-binding cassette sub-family G member 2 OS=Ovis aries GN=ABCG2 PE=2 SV=1 - [Q009B1_SHEEP]	5.47	2	4	4	5	1.35414	5	9.52896	1.16945	5	12.566	1.13111	5	24.7663	1.06273	5	14.5263	1.21584	5	3.62103	658	73.126	8.57275
W5Q611	Uncharacterized protein (Fragment) OS=Ovis aries GN=KRT1 PE=3 SV=1 - [W5Q611_SHEEP]	2.38	1	2	2	5	1.35154	5	1.37187	0.835618	5	11.3597	1.41116	5	34.9932	1.51391	5	18.2186	2.14047	5	9.65295	756	75.7571	8.70459
W5QH45	Uncharacterized protein OS=Ovis aries GN=KNG1 PE=4 SV=1 - [W5QH45_SHEEP]	2.75	2	1	1	1	1.34865	1		1.60893	1		1.73409	1		1.738	1		1.09617	1		436	48.6592	6.53662
W5NSA6	Uncharacterized protein OS=Ovis aries GN=A2M PE=4 SV=1 - [W5NSA6_SHEEP]	4.06	1	6	6	6	1.34825	6	17.1294	1.42186	6	16.2308	1.09871	6	13.7161	0.804239	6	10.9546	0.803153	6	28.2683	1477	164.116	6.02393
A6YRY8	40S ribosomal protein SA OS=Ovis aries GN=RPSA PE=2 SV=1 - [RSSA_SHEEP]	4.41	3	1	1	1	1.33538	1		1.3908	1		0.878397	1		0.685865	1		0.76045	1		295	32.8645	4.93213
Q9XSQ2	Surfactant protein D (Fragment) OS=Ovis aries GN=sp-D PE=2 SV=1 - [Q9XSQ2_SHEEP]	36.63	3	2	2	2	1.32517	2	11.9925	1.14252	2	12.4769	1.54761	2	11.9148	1.58464	2	14.5197	1.74778	2	27.6037	101	10.8642	4.88135
W5PJR5	Serum amyloid A protein (Fragment) OS=Ovis aries GN=LOC101121216 PE=3 SV=1 - [W5PJR5_SHEEP]	31.29	3	2	5	65	1.32505	43	17.7569	2.2151	43	22.0837	1.2573	43	21.3448	1.76568	43	26.8233	2.4383	43	33.0351	147	15.9439	9.70068
W5PV41	Uncharacterized protein OS=Ovis aries GN=HHIPL2 PE=4 SV=1 - [W5PV41_SHEEP]	4.43	2	3	3	4	1.32275	4	12.2569	1.74524	4	24.2027	1.45209	4	10.1953	1.35478	4	34.3174	1.34066	4	35.8248	767	85.9076	9.42236
A2SW69	Annexin A2 OS=Ovis aries GN=ANXA2 PE=1 SV=1 - [ANXA2_SHEEP]	2.95	1	1	1	1	1.32125	1		1.61673	1		1.18137	1		1.73593	1		1.82596	1		339	38.5878	7.31299
P11839	Beta-casein OS=Ovis aries GN=CSN2 PE=1 SV=3 - [CASB_SHEEP]	37.84	2	7	9	1893	1.30657	1220	22.4118	1.26885	1220	24.1573	2.10924	1219	29.7184	2.63491	1220	31.103	2.95612	1220	35.062	222	24.8592	5.35107
W5PDM2	Uncharacterized protein OS=Ovis aries GN=FGFBP1 PE=4 SV=1 - [W5PDM2_SHEEP]	3.42	1	1	1	1	1.30584	1		1.50581	1		7.1418	1		2.01385	1		2.64366	1		234	26.2283	8.90967
W5PSD8	Uncharacterized protein OS=Ovis aries GN=GP2 PE=4 SV=1 - [W5PSD8_SHEEP]	12.76	1	7	7	13	1.29158	13	11.7881	1.0881	13	15.6968	1.15622	13	29.6632	0.959723	13	28.208	0.941383	13	14.5232	533	58.9942	4.85596
W5PCV9	Uncharacterized protein OS=Ovis aries GN=LAMA3 PE=4 SV=1 - [W5PCV9_SHEEP]	0.33	1	1	1	1	1.27514	1		1.11954	1		0.898084	1		1.21111	1		0.605913	1		3334	366.926	7.09326
W5NU39	Uncharacterized protein OS=Ovis aries GN=FABP3 PE=3 SV=1 - [W5NU39_SHEEP]	42.86	7	7	7	27	1.27067	27	23.1859	1.93836	27	28.8516	1.57403	27	32.037	1.57554	27	35.4749	1.60164	27	38.5741	133	14.7526	6.56592
W5PJA0	Uncharacterized protein (Fragment) OS=Ovis aries GN=CUTA PE=4 SV=1 - [W5PJA0_SHEEP]	7.91	1	1	1	1	1.26292	1		1.38765	1		1.08275	1		0.875585	1		2.09159	1		177	18.8028	5.47803
W5Q3W4	Uncharacterized protein OS=Ovis aries GN=RAB18 PE=3 SV=1 - [W5Q3W4_SHEEP]	6.31	1	1	1	1	1.25544	1		1.24668	1		1.96098	1		2.55301	1		3.28059	1		206	22.9767	5.23682
W5PHP7	Uncharacterized protein OS=Ovis aries GN=LOC101117146 PE=3 SV=1 - [W5PHP7_SHEEP]	6.86	1	3	4	9	1.23505	8	32.8473	1.08388	8	5.07329	1.31872	8	8.77936	1.23823	8	39.4609	1.24995	8	23.9293	452	50.339	7.54736
W5PRX0	Uncharacterized protein OS=Ovis aries GN=PTTG1IP PE=4 SV=1 - [W5PRX0_SHEEP]	17.14	2	3	3	3	1.23441	3	68.8849	1.43516	3	34.6912	1.50772	3	24.1834	1.89065	3	33.8393	1.59222	3	22.5239	175	19.7708	8.63135
W5PTZ8	Uncharacterized protein OS=Ovis aries GN=LOC101114959 PE=3 SV=1 - [W5PTZ8_SHEEP]	28.57	1	4	4	7	1.23438	7	42.2418	1.51988	7	43.1231	1.45024	7	18.4258	1.73065	7	91.1537	2.18621	7	71.6714	147	17.0255	9.37842
W5NX51	Uncharacterized protein OS=Ovis aries GN=APOA1 PE=4 SV=1 - [W5NX51_SHEEP]	42.08	2	12	12	47	1.23079	47	14.6109	1.18037	47	16.3619	1.60139	47	20.2663	1.25219	47	31.4172	1.39753	47	32.6209	259	29.5135	6.20166
W5PF65	Uncharacterized protein OS=Ovis aries GN=TF PE=3 SV=1 - [W5PF65_SHEEP]	18.47	3	9	11	28	1.22508	21	15.5935	1.31046	21	15.2855	1.55633	21	19.4518	1.07014	21	34.7171	0.832066	21	43.586	704	77.2905	6.81494
W5NV32	Uncharacterized protein OS=Ovis aries PE=4 SV=1 - [W5NV32_SHEEP]	7.56	1	1	1	2	1.22279	2	13.8092	0.864274	2	20.1272	0.997731	2	19.9405	1.57813	2	11.8562	1.29472	2	6.86083	172	19.1117	5.60498
W5P6E0	Uncharacterized protein OS=Ovis aries GN=OS9 PE=4 SV=1 - [W5P6E0_SHEEP]	4.64	6	3	4	18	1.2032	4	43.4792	1.06807	4	15.6172	1.28021	4	5.45025	1.51301	4	8.94901	1.3989	4	37.859	668	75.9812	4.91943
W5QFH5	Uncharacterized protein (Fragment) OS=Ovis aries GN=RAB1A PE=3 SV=1 - [W5QFH5_SHEEP]	3.45	1	1	1	1	1.19932	1		2.60415	1		2.12131	1		1.7439	1		1.80551	1		203	22.3483	7.03467
W5PUF2	Histone H2B OS=Ovis aries GN=LOC101122398 PE=3 SV=1 - [W5PUF2_SHEEP]	17.46	20	3	3	3	1.1925	3	2.00679	1.2651	3	1.31666	0.710808	3	44.3497	0.463496	3	20.3031	0.919898	3	35.9103	126	13.9116	10.3159
W5NZY6	Uncharacterized protein OS=Ovis aries GN=DNAJB9 PE=4 SV=1 - [W5NZY6_SHEEP]	3.59	1	1	1	3	1.18768	3	46.7292	0.897262	3	174.047	0.977504	3	60.0564	1.20256	3	3.98633	1.48079	3	29.9407	223	25.7843	8.27979
P02669	Kappa-casein OS=Ovis aries GN=CSN3 PE=1 SV=2 - [CASK_SHEEP]	32.29	5	6	6	548	1.18046	546	17.8086	1.17623	546	21.7162	1.62375	546	28.8699	1.64904	546	31.3491	2.02837	546	27.5551	192	21.4248	6.16357
W5P6F4	Uncharacterized protein OS=Ovis aries GN=C5 PE=4 SV=1 - [W5P6F4_SHEEP]	0.6	1	1	1	1	1.18009	1		0.916587	1		1.0662	1		0.884165	1		0.628415	1		1680	188.813	6.65381
W5PP98	Uncharacterized protein OS=Ovis aries GN=GLYAT PE=4 SV=1 - [W5PP98_SHEEP]	5.03	1	1	1	1	1.17861	1		1.27337	1		1.12981	1		1.32224	1		1.87395	1		298	33.9992	8.00146
W5PCL4	Uncharacterized protein OS=Ovis aries GN=ACSL1 PE=4 SV=1 - [W5PCL4_SHEEP]	5.72	1	4	4	4	1.17125	4	34.356	1.11609	4	27.7696	1.09354	4	29.4063	1.59019	4	2.45863	1.37301	4	7.39376	734	81.8701	7.63525
W5NZQ2	Uncharacterized protein OS=Ovis aries GN=LAP3 PE=3 SV=1 - [W5NZQ2_SHEEP]	2.3	1	1	1	1	1.17011	1		1.09796	1		0.665622	1		0.511457	1		0.625755	1		522	56.4789	6.48096
D2DRB7	Alpha-s1-casein variant OS=Ovis aries GN=CSN1S1 PE=2 SV=1 - [D2DRB7_SHEEP]	66.5	4	1	15	2141	1.16875	1		0.889446	1		2.00631	1		2.0459	1		2.48888	1		206	23.47	6.20166
Q9XSC0	Beta-lactoglobulin C (Fragment) OS=Ovis aries GN=LGB PE=4 SV=1 - [Q9XSC0_SHEEP]	77.78	1	1	1	15	1.16632	15	31.3303	1.38103	15	49.9951	1.5257	15	17.8766	4.69655	15	64.4352	1.70232	15	23.7943	27	3.04857	7.34229
W5NUH1	Uncharacterized protein OS=Ovis aries GN=CIDEA PE=4 SV=1 - [W5NUH1_SHEEP]	4.11	1	1	1	2	1.16271	2	91.4072	0.647331	2	52.6649	0.735135	2	26.0368	0.838962	2	37.7963	0.67791	2	2.45494	219	24.3365	9.14404
Q9XT27	Ceruloplasmin OS=Ovis aries GN=CP PE=2 SV=1 - [CERU_SHEEP]	5.06	3	4	4	4	1.16251	4	15.0661	1.07889	4	14.0211	1.33234	4	36.7556	0.965064	4	30.8612	0.94877	4	17.6651	1048	119.05	5.80811
Q9XSM0	Prostaglandin-H2 D-isomerase OS=Ovis aries GN=PTGDS PE=1 SV=1 - [PTGDS_SHEEP]	7.33	1	1	1	1	1.16194	1		0.771841	1		0.463578	1		0.375384	1		0.462239	1		191	21.1696	6.55127
W5Q293	Uncharacterized protein OS=Ovis aries GN=DNAH8 PE=4 SV=1 - [W5Q293_SHEEP]	0.17	1	1	1	1	1.15761	1		0.69851	1		0.746253	1		0.769836	1		1.93588	1		4731	541	6.02393
W5Q9H2	Protein disulfide-isomerase OS=Ovis aries GN=P4HB PE=3 SV=1 - [W5Q9H2_SHEEP]	1.96	1	1	1	1	1.15208	1		1.27302	1		0.902581	1		1.1949	1		1.08462	1		511	57.1469	4.94482
P32262	Antithrombin-III OS=Ovis aries GN=SERPINC1 PE=2 SV=1 - [ANT3_SHEEP]	7.31	2	4	4	4	1.15194	4	24.5823	1.19163	4	12.4898	1.76662	4	22.4207	1.31982	4	15.8749	1.2414	4	11.7021	465	52.4658	6.85889
W5PZD0	Uncharacterized protein OS=Ovis aries GN=LOC101110099 PE=4 SV=1 - [W5PZD0_SHEEP]	36.04	1	4	4	14	1.15019	14	16.7839	1.10943	14	11.9822	1.33044	14	12.6039	2.21291	14	19.9381	2.3684	14	20.612	111	12.5618	9.12939
W5PS45	Alpha-mannosidase (Fragment) OS=Ovis aries GN=MAN2B1 PE=3 SV=1 - [W5PS45_SHEEP]	1.5	1	1	1	1	1.14544	1		0.956725	1		1.25066	1		1.23843	1		1.5638	1		1003	113.308	8.22119
W5NVC9	Uncharacterized protein (Fragment) OS=Ovis aries GN=RAC1 PE=3 SV=1 - [W5NVC9_SHEEP]	4.44	3	1	1	1	1.14455	1		0.65401	1		0.624146	1		0.547712	1		0.528881	1		180	20.2356	8.5874
P09462	Alpha-lactalbumin OS=Ovis aries GN=LALBA PE=1 SV=2 - [LALBA_SHEEP]	41.55	1	1	7	264	1.13646	3	20.8902	1.17919	3	39.5925	1.19637	3	3.05133	1.46383	3	60.7725	1.69009	3	11.0407	142	16.3049	5.021
W5NSD5	Uncharacterized protein OS=Ovis aries GN=RAP1B PE=4 SV=1 - [W5NSD5_SHEEP]	10.33	2	2	2	2	1.13444	2	14.5559	0.98215	2	1.98187	1.06075	2	4.6586	1.02307	2	12.7249	1.01365	2	4.01817	184	20.8116	5.78271
W5Q4T2	Uncharacterized protein OS=Ovis aries GN=KRI1 PE=4 SV=1 - [W5Q4T2_SHEEP]	1.18	1	1	1	3	1.13106	3	15.4848	1.16347	3	6.07619	1.98528	3	13.2476	1.79487	3	12.889	2.19116	3	14.3626	764	88.4974	5.37646
W5NPT7	Uncharacterized protein OS=Ovis aries GN=BTN1A1 PE=4 SV=1 - [W5NPT7_SHEEP]	31.37	6	15	18	179	1.13041	142	17.864	1	142	19.1237	1.09795	142	24.9707	1.10015	142	30.2061	1.08305	142	28.5046	526	59.1708	5.21143
W5Q4D0	Uncharacterized protein (Fragment) OS=Ovis aries GN=GAK PE=4 SV=1 - [W5Q4D0_SHEEP]	2	1	2	2	2	1.12599	2	308.831	0.426646	1		0.801425	2	205.955	0.995137	2	509.536	1.22481	2	628.616	1098	119.525	6.0874
W5NZ47	Uncharacterized protein (Fragment) OS=Ovis aries GN=RBP4 PE=4 SV=1 - [W5NZ47_SHEEP]	6.67	1	1	1	1	1.1241	1		2.0822	1		1.78806	1		1.51547	1		1.63503	1		165	18.876	5.22412
W5Q9A2	Uncharacterized protein (Fragment) OS=Ovis aries GN=AZGP1 PE=3 SV=1 - [W5Q9A2_SHEEP]	8.31	1	2	2	2	1.1213	2	15.0188	0.760794	2	17.3121	0.919377	2	18.4764	0.677255	2	9.22694	0.828714	2	23.4979	313	35.3945	6.02393
W5Q3X2	Peptidyl-prolyl cis-trans isomerase OS=Ovis aries PE=4 SV=1 - [W5Q3X2_SHEEP]	12.04	1	1	1	1	1.1188	1		1.19302	1		0.941364	1		0.922529	1		0.953458	1		108	11.9222	9.11475
W5NUX8	Uncharacterized protein OS=Ovis aries PE=4 SV=1 - [W5NUX8_SHEEP]	3.56	4	5	5	8	1.11286	8	29.3818	1.30563	8	18.945	1.14918	8	28.6736	0.946023	8	23.5632	0.824097	8	19.4576	1544	169.263	8.29443
W5PD71	Uncharacterized protein OS=Ovis aries GN=CRP PE=4 SV=1 - [W5PD71_SHEEP]	16.07	1	3	3	3	1.11194	3	6.09563	0.905649	3	1.34263	0.661376	3	63.7442	0.730379	3	59.0641	0.72689	3	53.6042	224	25.2588	6.771
W5NVL1	Uncharacterized protein OS=Ovis aries GN=LAPTM5 PE=4 SV=1 - [W5NVL1_SHEEP]	12.12	2	1	1	1	1.11082	1		3.14699	1		3.98207	1		5.40836	1		5.78944	1		264	29.8707	8.99756
W5P1W2	Uncharacterized protein OS=Ovis aries GN=FOLR3 PE=4 SV=1 - [W5P1W2_SHEEP]	5.68	1	2	2	8	1.1052	8	7.44986	1.20804	8	17.3574	1.17981	8	16.2141	1.10912	8	16.6811	0.82419	8	6.4466	264	30.5287	8.07471
W5PE22	Uncharacterized protein (Fragment) OS=Ovis aries GN=GDI2 PE=4 SV=1 - [W5PE22_SHEEP]	2.09	2	1	1	1	1.10042	1		1.00409	1		1.06134	1		1.20061	1		1.16002	1		430	48.8069	6.97607
A4ZVY8	Beta-2-microglobulin OS=Ovis aries PE=2 SV=1 - [A4ZVY8_SHEEP]	29.66	6	4	4	38	1.09715	38	24.7012	1.03389	38	20.3125	1.23775	38	26.5772	1.51526	38	40.4578	1.48706	38	34.3024	118	13.601	6.91748
W5Q9B6	Uncharacterized protein (Fragment) OS=Ovis aries GN=VWA9 PE=4 SV=1 - [W5Q9B6_SHEEP]	4.32	1	1	1	7	1.09487	7	18.8168	0.977511	7	11.5238	1.35595	7	11.4644	1.79789	7	25.0916	1.7004	7	15.3413	533	58.9708	5.22412
W5P7E7	Uncharacterized protein OS=Ovis aries GN=PCOLCE2 PE=4 SV=1 - [W5P7E7_SHEEP]	3.86	1	1	1	1	1.09183	1		1.11683	1		1.48558	1		1.40349	1		1.72307	1		415	45.5049	8.63135
Q7M371	Plasma proteinase inhibitor (Fragment) OS=Ovis aries PE=1 SV=1 - [Q7M371_SHEEP]	40	1	1	1	1	1.08881	1		1.73274	1		2.47624	1		1.43856	1		1.55352	1		20	2.23816	4.61475
W5Q3I2	Uncharacterized protein OS=Ovis aries GN=GLYCAM1 PE=4 SV=1 - [W5Q3I2_SHEEP]	25.97	2	5	5	161	1.08549	150	14.8499	0.950223	150	20.5645	1.41812	150	25.0117	2.16766	150	30.8338	2.12032	150	32.3608	154	17.0599	5.56689
W5PZI1	Clusterin OS=Ovis aries GN=CLU PE=3 SV=1 - [W5PZI1_SHEEP]	29.16	4	11	11	92	1.06433	92	15.8679	2.36599	92	39.5286	0.982029	92	27.5338	1.02372	92	29.1209	0.977329	92	25.8113	439	50.9842	6.07471
W5Q629	Uncharacterized protein OS=Ovis aries GN=DDI1 PE=4 SV=1 - [W5Q629_SHEEP]	2.53	1	1	1	1	1.06165	1		0.691516	1		0.953835	1		1.95096	1		2.20901	1		396	44.0183	6.0874
W5NY46	Uncharacterized protein OS=Ovis aries GN=PON1 PE=4 SV=1 - [W5NY46_SHEEP]	1.97	1	1	1	2	1.06112	2	6.79814	1.34627	2	2.80621	1.20755	2	24.6828	0.800659	2	11.5492	0.891137	2	1.80159	355	39.8692	5.35107
P50413	Thioredoxin OS=Ovis aries GN=TXN PE=1 SV=2 - [THIO_SHEEP]	12.38	1	1	1	2	1.06108	2	27.4656	1.29984	2	29.631	1.27491	2	39.4471	1.52044	2	36.4499	1.33291	2	42.4418	105	11.8348	5.03369
W5PZJ1	Uncharacterized protein OS=Ovis aries GN=SCGB2A2 PE=4 SV=1 - [W5PZJ1_SHEEP]	28.57	1	2	2	5	1.06091	5	1.83996	1.05429	5	26.1514	1.31413	5	15.3467	2.10641	5	33.9434	2.7818	5	48.4466	84	9.41774	4.65283
W5PH81	Uncharacterized protein OS=Ovis aries GN=C7 PE=4 SV=1 - [W5PH81_SHEEP]	2.13	1	2	2	2	1.06089	2	51.2828	0.961957	2	24.6878	1.03664	2	18.3138	1.01378	2	21.0724	0.875909	2	26.555	844	93.3317	7.10791
P14639	Serum albumin OS=Ovis aries GN=ALB PE=1 SV=1 - [ALBU_SHEEP]	61.94	2	1	43	827	1.05782	26	17.5871	1.32205	26	25.6545	1.89035	26	35.4168	1.45741	26	24.0135	1.63478	26	16.8253	607	69.1433	6.15088
W5Q268	Uncharacterized protein OS=Ovis aries GN=APOH PE=4 SV=1 - [W5Q268_SHEEP]	5.22	1	2	2	2	1.05451	2	16.8501	0.876236	2	6.0888	1.13141	2	15.3908	1.03692	2	8.44107	0.900641	2	9.94956	345	38.1306	8.07471
P00349	6-phosphogluconate dehydrogenase, decarboxylating OS=Ovis aries GN=PGD PE=1 SV=4 - [6PGD_SHEEP]	4.76	2	1	2	4	1.04956	1		1.43325	1		1.31108	1		1.43964	1		1.50135	1		483	52.936	7.69385
W5QI04	Uncharacterized protein (Fragment) OS=Ovis aries GN=TPM1 PE=3 SV=1 - [W5QI04_SHEEP]	2.52	7	1	1	1	1.04811	1		1.53805	1		1	1		0.835227	1		0.975635	1		278	31.5371	4.84326
W5NS65	Uncharacterized protein OS=Ovis aries GN=HIST1H1E PE=3 SV=1 - [W5NS65_SHEEP]	12.22	3	3	3	4	1.04643	4	6.23953	1.31242	4	21.1573	1.03381	4	59.5372	0.754152	4	35.1332	1.08606	4	46.8135	221	22.6204	11.2388
W5PAJ2	Uncharacterized protein OS=Ovis aries GN=PSAP PE=4 SV=1 - [W5PAJ2_SHEEP]	3.24	1	2	2	12	1.04597	12	11.8068	0.946844	12	20.2135	1.18917	12	10.7329	1.15067	12	14.2278	1.32392	12	9.75828	525	58.0857	5.10986
Q5TIK9	Putative cyclophilin B (Fragment) OS=Ovis aries GN=cyclophilin B PE=2 SV=1 - [Q5TIK9_SHEEP]	23.01	4	2	3	5	1.0426	4	11.1568	0.740257	4	8.28125	0.900541	4	5.32662	1.14147	4	15.9933	0.901147	4	24.811	113	12.4503	8.11865
D6PZY4	Factor H (Fragment) OS=Ovis aries GN=fH PE=2 SV=1 - [D6PZY4_SHEEP]	6.84	3	7	7	8	1.04251	8	31.4864	1.14093	8	17.6384	1.39367	8	10.7423	1.15555	8	8.56938	0.887205	8	25.9453	1111	125.295	6.7124
F2YQ13	Gelsolin isoform b OS=Ovis aries GN=GSN PE=2 SV=1 - [F2YQ13_SHEEP]	8.34	2	7	7	7	1.03835	7	76.4063	0.867082	7	30.7452	1.23008	7	34.6026	1.06889	7	46.8866	1.16078	7	40.743	731	80.6696	5.84619
W5NW65	Tetraspanin OS=Ovis aries GN=TSPAN6 PE=3 SV=1 - [W5NW65_SHEEP]	3.27	1	1	1	2	1.03705	2	77.8147	1.15385	2	92.5493	1.41975	2	114.255	1.84752	2	130.345	1.51971	2	117.55	245	27.54	7.73779
W5P3X8	Kinesin-like protein OS=Ovis aries GN=KIF15 PE=3 SV=1 - [W5P3X8_SHEEP]	0.5	2	1	1	1	1.03591	1		0.807361	1		1.18123	1		0.86874	1		2.69046	1		1389	160.429	5.89697
W5QAB1	Uncharacterized protein OS=Ovis aries GN=HPX PE=4 SV=1 - [W5QAB1_SHEEP]	13.91	1	8	8	15	1.0346	15	15.6092	1.28581	15	24.3059	1.47996	15	24.8322	0.783101	15	20.9891	0.674289	15	14.0045	460	51.8996	7.02002
W5P0U4	Uncharacterized protein OS=Ovis aries GN=MUC1 PE=4 SV=1 - [W5P0U4_SHEEP]	4.42	1	3	3	21	1.03401	21	22.4243	1.06351	21	16.919	1.25593	21	17.2579	1.37471	21	13.29	1.2802	21	13.5097	588	58.6119	7.07861
H9A6H7	Myostatin variant A (Fragment) OS=Ovis aries GN=MSTN PE=4 SV=1 - [H9A6H7_SHEEP]	12.35	8	1	1	1	1.03372	1		0.366091	1		0.213266	1		0.168325	1		0.164833	1		81	9.29985	5.17334
W5NSJ5	Uncharacterized protein OS=Ovis aries GN=OXSR1 PE=4 SV=1 - [W5NSJ5_SHEEP]	3.8	1	1	1	1	1.03241	1		0.264727	1		0.131241	1		0.309377	1		0.249457	1		527	57.851	6.29053
W5PFC9	Uncharacterized protein (Fragment) OS=Ovis aries GN=LOC101117129 PE=4 SV=1 - [W5PFC9_SHEEP]	9.65	1	4	6	15	1.0298	8	19.9772	0.82679	8	16.5527	1.1051	8	14.2569	1.08411	8	11.6807	1.02443	8	16.3163	705	77.8879	6.60986
W5PSM5	Uncharacterized protein (Fragment) OS=Ovis aries GN=LSM4 PE=4 SV=1 - [W5PSM5_SHEEP]	4.83	1	1	1	79	1.02953	79	11.2732	1.06516	79	14.9979	1.76779	79	15.0082	2.85576	79	11.2248	2.97719	79	13.2334	145	15.554	9.94971
P53791	Sodium/glucose cotransporter 1 OS=Ovis aries GN=SLC5A1 PE=2 SV=1 - [SC5A1_SHEEP]	1.66	1	1	1	2	1.02932	2	23.8848	1.2595	2	21.9691	1.37672	2	0.0113518	1.36674	2	5.10296	1.36671	2	10.2011	664	73.1299	7.44482
P68116	Fibrinogen beta chain (Fragment) OS=Ovis aries GN=FGB PE=1 SV=1 - [FIBB_SHEEP]	60	1	1	1	2	1.02241	2	64.6567	2.0539	2	82.0836	1.94382	2	86.3385	1.617	2	55.2156	1.11622	2	29.5023	20	2.33712	4.43701
I1WXR3	Alpha-1-antitrypsin transcript variant 1 OS=Ovis aries GN=SERPINA1 PE=2 SV=1 - [I1WXR3_SHEEP]	14.9	7	1	8	23	1.0189	1		1.04155	1		2.04631	1		1.38189	1		1.66217	1		416	45.9977	6.20166
W5QCD6	Isocitrate dehydrogenase [NADP] OS=Ovis aries GN=IDH1 PE=3 SV=1 - [W5QCD6_SHEEP]	8.7	3	4	4	4	1.01307	4	49.8691	1.76637	4	23.4258	0.972257	4	33.7787	1.08446	4	53.6596	1.07278	4	54.8875	414	46.7035	6.80029
W5QGX7	Uncharacterized protein OS=Ovis aries GN=EHD4 PE=4 SV=1 - [W5QGX7_SHEEP]	2.04	1	1	1	1	1.01287	1		0.954239	1		1.12375	1		0.911867	1		0.953359	1		540	61.0595	7.85498
W5NXP3	Uncharacterized protein (Fragment) OS=Ovis aries GN=LOC101111083 PE=3 SV=1 - [W5NXP3_SHEEP]	12.2	1	2	3	3	1.00938	2	2.59561	1.20889	2	3.07529	1.34204	2	24.6377	0.718912	2	26.4676	1.11162	2	16.1805	205	22.7368	4.85596
W5Q5J5	Uncharacterized protein OS=Ovis aries PE=4 SV=1 - [W5Q5J5_SHEEP]	3.45	2	1	1	2	1	2	5.81443	0.786222	2	4.81195	0.714964	2	14.9494	0.530241	2	29.0916	0.551643	2	20.788	203	22.6331	10.1548
W5QH04	Amine oxidase [flavin-containing] OS=Ovis aries GN=LOC101103614 PE=3 SV=1 - [W5QH04_SHEEP]	1.93	1	1	1	1	1	1		0.681143	1		0.527341	1		0.441892	1		0.443878	1		518	57.9728	8.71924
W5NPK5	Uncharacterized protein (Fragment) OS=Ovis aries GN=C3 PE=4 SV=1 - [W5NPK5_SHEEP]	25.57	2	4	15	39	0.997264	15	31.4831	1.14133	15	16.0037	1.36227	15	34.0132	1.18759	15	33.3135	1.0431	15	41.5835	653	73.6313	7.54736
A6ZE99	Perilipin OS=Ovis aries GN=ADFP PE=2 SV=1 - [A6ZE99_SHEEP]	46.67	1	19	19	94	0.995706	94	24.5785	0.931724	94	23.4714	0.913818	94	27.6781	0.913343	94	34.1571	0.951918	94	29.5815	450	49.2762	8.03076
B0FZM4	Myosin light chain 6 (Fragment) OS=Ovis aries PE=2 SV=1 - [B0FZM4_SHEEP]	7.69	2	1	1	1	0.991108	1		1.17539	1		0.638128	1		0.481363	1		0.582958	1		143	15.9808	4.67822
W5NUV2	Uncharacterized protein (Fragment) OS=Ovis aries GN=ARF5 PE=3 SV=1 - [W5NUV2_SHEEP]	3.75	9	1	1	1	0.990693	1		1.04226	1		0.902215	1		1.12615	1		0.938328	1		160	18.1783	5.35107
W5QH64	Synaptosomal-associated protein OS=Ovis aries GN=SNAP23 PE=3 SV=1 - [W5QH64_SHEEP]	15.64	1	3	3	3	0.985687	3	32.0651	0.946061	3	40.3872	1.13981	3	18.1808	1.09912	3	7.01858	0.999361	3	20.5839	211	23.2114	4.94482
W5Q2V0	Uncharacterized protein OS=Ovis aries GN=YKT6 PE=4 SV=1 - [W5Q2V0_SHEEP]	4.55	1	1	1	1	0.98547	1		0.819819	1		0.853489	1		0.913056	1		0.968023	1		198	22.4224	6.58057
S5FR89	Cathepsin B OS=Ovis aries GN=CTSB PE=2 SV=1 - [S5FR89_SHEEP]	7.76	2	2	2	5	0.982238	5	22.2952	0.933947	5	75.9101	0.840415	5	32.867	0.908917	5	49.7226	0.96794	5	39.7255	335	36.7572	6.02393
W5QH23	Uncharacterized protein OS=Ovis aries GN=MASP1 PE=3 SV=1 - [W5QH23_SHEEP]	9.64	2	6	6	13	0.981871	13	12.1656	0.924089	13	14.6166	1.18522	13	24.1242	1.27197	13	16.1741	1.54627	13	16.3509	581	65.5788	5.42725
W5PCT4	Uncharacterized protein OS=Ovis aries GN=SLC34A2 PE=4 SV=1 - [W5PCT4_SHEEP]	4.27	3	4	4	12	0.979891	12	10.001	0.927164	12	11.6649	1.0412	12	13.3295	1.09784	12	20.0207	0.80961	12	37.812	749	81.6557	7.94287
W5Q9P7	Cofilin-1 (Fragment) OS=Ovis aries GN=CFL1 PE=4 SV=1 - [W5Q9P7_SHEEP]	9.09	4	2	2	2	0.977856	2	40.1455	1.23046	2	14.8626	1.19004	2	51.1976	1.06305	2	35.8041	1.14179	2	17.0479	165	18.3756	8.00146
W5P8F9	Uncharacterized protein OS=Ovis aries PE=4 SV=1 - [W5P8F9_SHEEP]	14.96	1	2	2	4	0.961352	4	10.1349	0.897011	4	14.3178	1.25469	4	22.5229	1.24523	4	9.54655	1.06258	4	12.549	254	28.1301	4.98291
W5Q302	Uncharacterized protein OS=Ovis aries GN=GANAB PE=3 SV=1 - [W5Q302_SHEEP]	5.87	2	5	5	6	0.961026	6	19.8338	0.829004	6	14.7905	0.868122	6	23.3521	0.898051	6	28.1492	1.19931	6	35.871	869	98.7642	5.89697
W5Q5W1	Uncharacterized protein OS=Ovis aries GN=SIL1 PE=4 SV=1 - [W5Q5W1_SHEEP]	2.36	1	1	1	1	0.959956	1		0.827236	1		0.897228	1		0.857683	1		0.894411	1		467	53.0634	5.66846
W5P0W4	Uncharacterized protein (Fragment) OS=Ovis aries GN=SEMA7A PE=4 SV=1 - [W5P0W4_SHEEP]	1.3	1	1	1	1	0.958749	1		0.976094	1		1.36939	1		1.53865	1		1.89937	1		614	69.5551	6.82959
W5PZS7	Uncharacterized protein OS=Ovis aries GN=SERPINA1 PE=3 SV=1 - [W5PZS7_SHEEP]	14.9	3	1	8	23	0.956621	1		0.697497	1		0.668474	1		1.60084	1		0.170944	1		416	45.9837	6.20166
W5PSA9	Uncharacterized protein (Fragment) OS=Ovis aries GN=VPS13A PE=4 SV=1 - [W5PSA9_SHEEP]	0.38	1	1	1	2	0.954099	2	40.3909	0.809961	2	26.9419	0.83029	2	27.0677	1.13678	2	44.6243	1.27508	2	6.68462	2394	273.04	6.11279
W5PS94	Uncharacterized protein OS=Ovis aries GN=NUCB1 PE=4 SV=1 - [W5PS94_SHEEP]	17.83	1	7	7	10	0.953157	10	25.811	0.748917	10	36.3678	0.972395	10	26.0832	1.08184	10	17.1913	0.920348	10	22.2808	460	53.489	5.23682
W5NRH2	Uncharacterized protein (Fragment) OS=Ovis aries GN=LOC101103133 PE=4 SV=1 - [W5NRH2_SHEEP]	26.98	1	3	4	10	0.952583	7	20.678	1.13328	7	30.9275	1.27631	7	20.1892	1.41911	7	22.5144	1.38181	7	6.86052	126	14.6482	6.97607
W5Q6N3	Uncharacterized protein OS=Ovis aries GN=LOC101115115 PE=4 SV=1 - [W5Q6N3_SHEEP]	4.66	2	3	3	27	0.946327	27	14.4254	1.01667	27	14.2558	1.32644	27	11.9127	1.14697	27	15.1484	1.45679	27	16.3926	472	52.7945	8.35303
W5P3T2	Uncharacterized protein OS=Ovis aries GN=CHID1 PE=4 SV=1 - [W5P3T2_SHEEP]	3.27	2	2	2	2	0.946113	2	42.7017	0.742163	2	101.514	0.807715	2	58.2811	1	2	59.2214	1.15345	2	69.4144	489	52.9414	9.65674
W5NVV6	Uncharacterized protein (Fragment) OS=Ovis aries GN=DNAJC3 PE=4 SV=1 - [W5NVV6_SHEEP]	3.37	1	2	2	3	0.94527	3	37.8714	0.872343	3	14.3142	0.869302	3	15.0027	0.954094	3	20.7308	1.28786	3	37.6862	505	58.2044	5.90967
P67975	Beta-lactoglobulin OS=Ovis orientalis musimon GN=LGB PE=1 SV=1 - [LACB_OVIMU]	98.15	9	16	16	2425	0.944215	2421	24.7324	0.881488	2420	31.81	1.17031	2420	33.7179	1.6624	2422	46.0491	1.76807	2422	36.6939	162	18.1394	5.37646
W5Q411	Uncharacterized protein OS=Ovis aries GN=HSPA13 PE=3 SV=1 - [W5Q411_SHEEP]	2.76	1	1	1	1	0.942645	1		0.564132	1		0.68434	1		0.837277	1		0.912744	1		471	51.7849	5.36377
W5PMC5	Uncharacterized protein OS=Ovis aries GN=LOC101112018 PE=3 SV=1 - [W5PMC5_SHEEP]	21.74	2	2	2	2	0.937787	2	45.2458	1.1366	2	4.06426	0.950469	2	14.0604	0.908775	2	12.5774	0.857402	2	19.2856	115	12.7757	9.62744
W5PSW9	Uncharacterized protein OS=Ovis aries GN=RPL8 PE=3 SV=1 - [W5PSW9_SHEEP]	4.28	1	1	1	1	0.936809	1		0.843288	1		0.555455	1		0.459082	1		0.594115	1		257	28.0073	11.0337
W5Q1W8	Uncharacterized protein OS=Ovis aries GN=GNPTG PE=4 SV=1 - [W5Q1W8_SHEEP]	2.64	1	1	1	1	0.936589	1		0.67934	1		0.95698	1		0.942072	1		0.917441	1		303	32.6082	7.15186
W5P101	Uncharacterized protein OS=Ovis aries GN=A1BG PE=4 SV=1 - [W5P101_SHEEP]	6.33	1	3	3	3	0.936227	3	1.93508	1.1402	3	6.98305	1.34082	3	10.2379	0.914118	3	14.8766	0.936414	3	4.58852	490	51.9167	8.57275
Q864L8	Peptidyl-prolyl cis-trans isomerase (Fragment) OS=Ovis aries PE=2 SV=1 - [Q864L8_SHEEP]	35.71	9	3	4	7	0.934198	6	19.2425	0.95272	6	33.1792	0.799734	6	44.434	0.686274	6	73.3198	0.658773	6	63.8387	112	12.1769	8.30908
P04653	Alpha-S1-casein OS=Ovis aries GN=CSN1S1 PE=1 SV=3 - [CASA1_SHEEP]	67.76	4	1	15	1752	0.930745	1		0.889623	1		0.899136	1		0.793659	1		8.50895	1		214	24.2904	5.42725
W5NWM2	Uncharacterized protein OS=Ovis aries GN=APOA4 PE=4 SV=1 - [W5NWM2_SHEEP]	27.03	1	9	9	13	0.930691	13	28.6825	0.935518	13	24.2478	1.37378	13	25.9271	1.15769	13	24.3315	1	13	26.8312	370	41.4545	5.75732
P68214	Fibrinogen alpha chain (Fragment) OS=Ovis aries GN=FGA PE=1 SV=1 - [FIBA_SHEEP]	100	1	1	1	2	0.930484	2	37.5842	2.26797	2	11.429	1.58571	2	28.0905	0.98046	2	36.3774	0.793352	2	174.502	19	1.84683	3.95459
W5PTR5	Uncharacterized protein (Fragment) OS=Ovis aries GN=HSPA5 PE=3 SV=1 - [W5PTR5_SHEEP]	6.71	3	2	4	5	0.928651	3	32.5763	0.751494	3	4.18855	0.599104	3	9.14105	0.594089	3	9.25239	0.683659	3	10.9978	656	72.5106	5.19873
W5QCV4	Uncharacterized protein OS=Ovis aries GN=DHRS1 PE=4 SV=1 - [W5QCV4_SHEEP]	18.21	1	5	5	5	0.928222	5	34.2463	0.63776	5	13.8008	0.663039	5	9.88217	0.637973	5	10.7152	0.670925	5	22.5257	313	34.0892	8.22119
W5NQG4	Uncharacterized protein (Fragment) OS=Ovis aries PE=4 SV=1 - [W5NQG4_SHEEP]	1.99	3	1	1	1	0.919273	1		1.28317	1		1.24251	1		1.00123	1		1.21549	1		402	44.3939	10.4331
W5P3R3	Uncharacterized protein (Fragment) OS=Ovis aries GN=LOC101112066 PE=3 SV=1 - [W5P3R3_SHEEP]	10.54	3	8	8	13	0.919205	11	19.6159	1.02174	11	20.4172	1.22218	11	14.7019	0.920404	11	27.5493	0.940651	11	16.4448	816	91.1215	7.26904
W5PAY2	Uncharacterized protein (Fragment) OS=Ovis aries GN=WWC2 PE=4 SV=1 - [W5PAY2_SHEEP]	0.61	1	1	1	1	0.917926	1		1.01486	1		1.87995	1		1.23492	1		1.37269	1		1156	128.727	5.84619
W5PNP1	Uncharacterized protein OS=Ovis aries GN=MFGE8 PE=4 SV=1 - [W5PNP1_SHEEP]	47.22	2	20	20	123	0.917068	123	19.7226	0.79698	123	35.1837	0.768665	123	29.2055	0.869528	123	27.2716	0.848515	123	35.8396	432	48.3286	7.31299
W5NSH8	Uncharacterized protein OS=Ovis aries GN=NPC2 PE=4 SV=1 - [W5NSH8_SHEEP]	15.44	1	2	2	4	0.915194	4	14.2649	0.810096	4	15.1182	0.962263	4	26.5638	1.20772	4	18.2869	1.0218	4	12.963	149	16.4314	7.98682
W5PMT0	Uncharacterized protein OS=Ovis aries GN=XDH PE=4 SV=1 - [W5PMT0_SHEEP]	32.51	5	38	40	305	0.915061	296	16.1844	0.846561	296	21.4076	0.793178	296	22.5071	0.865687	296	22.6053	0.811866	296	25.4352	1329	146.531	7.79639
W5NTW3	Uncharacterized protein (Fragment) OS=Ovis aries GN=ITIH1 PE=4 SV=1 - [W5NTW3_SHEEP]	0.77	1	1	1	1	0.914769	1		1.04507	1		1.35659	1		1.44239	1		1.33986	1		912	101.592	7.26904
W5NZU3	Uncharacterized protein OS=Ovis aries GN=CDH1 PE=4 SV=1 - [W5NZU3_SHEEP]	2.27	1	2	2	2	0.910187	2	0.553142	0.742731	2	4.13025	0.90479	2	22.5036	0.854291	2	2.52597	1.08306	2	4.05795	883	97.8712	4.94482
W5PWE9	Serum albumin OS=Ovis aries GN=ALB PE=4 SV=1 - [W5PWE9_SHEEP]	62.4	2	1	43	820	0.908476	20	19.2749	0.821086	20	16.726	1.41692	20	15.2844	1.12627	20	20.2514	0.987175	20	19.1862	609	69.3194	6.15088
W5P979	Uncharacterized protein OS=Ovis aries GN=LAG3 PE=4 SV=1 - [W5P979_SHEEP]	1.35	1	1	1	1	0.90765	1		0.905859	1		0.714288	1		0.84285	1		1.26612	1		520	56.3757	8.104
B2MVW5	RhoF OS=Ovis aries PE=2 SV=1 - [B2MVW5_SHEEP]	3.26	2	1	1	1	0.905053	1		0.988889	1		1.35632	1		1.27154	1		1.39974	1		215	23.8252	8.33838
Q30DR4	Macrophage migration inhibitory factor (Fragment) OS=Ovis aries GN=MIF PE=2 SV=1 - [Q30DR4_SHEEP]	8.74	2	1	1	1	0.901266	1		1.46009	1		1.0785	1		0.845179	1		1.02774	1		103	11.0997	7.78174
W5Q695	Transporter OS=Ovis aries GN=SLC6A14 PE=3 SV=1 - [W5Q695_SHEEP]	1.09	1	1	1	2	0.891781	2	21.1113	0.610306	2	56.406	0.503414	2	73.4566	0.774242	2	53.3142	0.739536	2	66.2122	641	72.1411	8.26514
W5P812	Uncharacterized protein OS=Ovis aries GN=AMBP PE=4 SV=1 - [W5P812_SHEEP]	3.13	1	1	1	1	0.890063	1		1.0898	1		1.20882	1		0.776715	1		0.534996	1		352	39.2033	7.40088
Q6RUR7	Butyrophilin (Fragment) OS=Ovis aries PE=4 SV=1 - [Q6RUR7_SHEEP]	33.08	1	1	3	27	0.886337	4	6.36255	0.693652	4	6.6993	0.908114	4	17.7457	0.870197	4	25.854	0.824896	4	20.0233	130	14.1431	5.16064
W5PG95	Uncharacterized protein (Fragment) OS=Ovis aries GN=HSPA1A PE=3 SV=1 - [W5PG95_SHEEP]	7.78	7	2	5	7	0.881473	2	24.576	1.03579	2	9.67238	0.809278	2	9.79288	0.730065	2	21.347	0.679728	2	19.9235	643	70.3572	5.92236
F5CC79	Beta-1,4-galactosyltransferase I OS=Ovis aries GN=B4GALT1 PE=2 SV=1 - [F5CC79_SHEEP]	22.64	2	9	9	18	0.879129	18	19.984	0.894373	18	12.0364	1.16941	18	10.6948	1.09132	18	25.8564	1.19355	18	21.159	402	44.7949	8.85107
W5P5I0	Uncharacterized protein OS=Ovis aries GN=CFI PE=3 SV=1 - [W5P5I0_SHEEP]	7.74	2	4	4	6	0.873611	6	18.3355	0.881479	6	5.0502	0.737186	6	31.095	0.701859	6	20.6094	0.542942	6	90.0701	607	67.2224	7.69385
D3G9G3	Lactoferrin OS=Ovis aries GN=LF PE=3 SV=1 - [D3G9G3_SHEEP]	7.34	5	6	6	7	0.872583	7	20.8253	1.76296	7	8.55474	0.652762	7	46.0089	0.719262	7	27.0789	0.715657	7	24.3279	708	77.2324	8.01611
B0BL71	Mannose-binding lectin OS=Ovis aries GN=mbl PE=4 SV=1 - [B0BL71_SHEEP]	4.42	3	1	1	1	0.871832	1		1.0026	1		0.631772	1		0.496052	1		0.387807	1		249	26.525	5.08447
W5P2V0	Uncharacterized protein (Fragment) OS=Ovis aries GN=EZR PE=4 SV=1 - [W5P2V0_SHEEP]	3.27	2	1	2	2	0.86191	1		1.0954	1		0.880811	1		0.836573	1		0.942112	1		551	65.2347	6.65381
W5PDJ6	Glutathione peroxidase (Fragment) OS=Ovis aries GN=GPX3 PE=3 SV=1 - [W5PDJ6_SHEEP]	13.25	1	2	2	3	0.860814	3	10.9126	0.945582	3	23.5694	0.984207	3	9.31338	1.03685	3	18.6149	1.03094	3	5.04487	151	17.3208	7.28369
W5PZU1	Uncharacterized protein OS=Ovis aries PE=4 SV=1 - [W5PZU1_SHEEP]	15.32	1	2	2	2	0.860174	2	3.56949	0.81831	2	14.6658	0.965964	2	24.6814	1.10974	2	34.6428	1.13833	2	33.6836	124	13.6407	4.50049
W5Q6U0	Uncharacterized protein OS=Ovis aries GN=FASN PE=4 SV=1 - [W5Q6U0_SHEEP]	11.55	3	23	23	37	0.859041	37	30.2066	1.40642	37	24.6274	0.979463	37	20.6166	0.773889	37	22.4629	0.827896	37	25.3003	2372	256.571	6.50732
W5PWM0	Uncharacterized protein OS=Ovis aries PE=4 SV=1 - [W5PWM0_SHEEP]	4.77	1	3	3	8	0.858558	8	22.6505	0.61673	8	21.7111	0.610653	8	37.9019	0.637309	8	21.2699	0.607528	8	36.5071	503	53.7236	7.50342
W5QGP4	Uncharacterized protein OS=Ovis aries GN=APOD PE=3 SV=1 - [W5QGP4_SHEEP]	9.39	1	2	2	2	0.853157	2	35.6204	0.873371	2	37.0892	0.895143	2	48.0176	0.611584	2	55.6836	0.724682	2	44.8077	213	24.0863	5.60498
W5QHS2	Matrix Gla protein OS=Ovis aries GN=MGP PE=3 SV=1 - [W5QHS2_SHEEP]	23.3	1	2	2	8	0.851404	8	29.5176	0.615177	8	25.2041	0.358096	8	58.2348	0.511423	8	13.0375	0.444024	8	26.2889	103	12.2232	9.14404
C8BKE6	Eukaryotic translation initiation factor 5A OS=Ovis aries GN=EIF5A PE=2 SV=1 - [C8BKE6_SHEEP]	5.19	2	1	1	1	0.850399	1		1.02151	1		0.947432	1		0.861516	1		0.985333	1		154	16.8214	5.23682
W5PHI7	Uncharacterized protein (Fragment) OS=Ovis aries GN=LOC101116892 PE=3 SV=1 - [W5PHI7_SHEEP]	15.27	1	1	3	5	0.850258	2	2.47195	1.12691	2	6.44772	1.18202	2	0.703502	0.796463	2	3.85213	0.840609	2	14.308	203	22.7268	5.09717
W5Q0C0	Uncharacterized protein OS=Ovis aries GN=PLOD3 PE=4 SV=1 - [W5Q0C0_SHEEP]	1.85	1	1	1	1	0.849291	1		0.600222	1		0.74886	1		0.698724	1		0.720532	1		755	86.3144	6.50732
W5PJZ2	Uncharacterized protein OS=Ovis aries GN=SERPING1 PE=3 SV=1 - [W5PJZ2_SHEEP]	6.88	2	3	3	4	0.848067	4	3.03842	0.958364	4	24.853	1.87825	4	37.2127	1.37621	4	33.6071	0.986162	4	39.163	509	55.6626	6.82959
W5PJ97	Uncharacterized protein OS=Ovis aries GN=APOA2 PE=4 SV=1 - [W5PJ97_SHEEP]	8.82	1	1	1	2	0.844136	2	4.51465	0.546287	2	1.80805	0.771345	2	57.2229	0.559284	2	19.3474	0.796593	2	26.3309	102	11.299	8.104
W5NRI1	Uncharacterized protein OS=Ovis aries GN=LOC101113831 PE=4 SV=1 - [W5NRI1_SHEEP]	23.09	1	16	16	57	0.840295	57	25.549	0.975086	57	21.7979	1.03821	57	26.901	1.10091	57	23.2303	1.12766	57	33.0678	680	74.9562	8.63135
W5PSA3	Uncharacterized protein OS=Ovis aries GN=TCN1 PE=4 SV=1 - [W5PSA3_SHEEP]	2.58	2	1	1	1	0.829304	1		0.757536	1		0.703007	1		1.39359	1		1.28287	1		427	47.6073	8.36768
W5P6B3	Uncharacterized protein OS=Ovis aries GN=LOC101102861 PE=4 SV=1 - [W5P6B3_SHEEP]	4.45	1	1	1	1	0.824423	1		0.528967	1		0.376202	1		0.328511	1		0.235459	1		292	32.615	5.22412
C8BKD1	Prothrombin OS=Ovis aries GN=F2 PE=2 SV=1 - [C8BKD1_SHEEP]	6.26	2	3	3	4	0.821013	4	13.1748	0.741398	4	48.8471	0.93065	4	29.4373	0.72535	4	0.223161	0.598464	4	12.4405	623	70.0045	6.60986
W5PTG9	Uncharacterized protein OS=Ovis aries GN=GC PE=4 SV=1 - [W5PTG9_SHEEP]	21.89	2	9	9	20	0.820166	20	40.572	0.856165	20	19.6744	1.20207	20	11.0876	0.923831	20	26.642	0.942523	20	45.9723	475	53.17	5.42725
Q9MZS8	Cathepsin D (Fragment) OS=Ovis aries GN=CTSD PE=1 SV=1 - [CATD_SHEEP]	8.22	2	2	2	2	0.81626	2	17.8565	0.721764	2	45.3585	0.779353	2	46.6876	0.835134	2	68.1589	0.845227	2	62.8041	365	39.7889	6.97607
W5Q1W2	Uncharacterized protein OS=Ovis aries GN=SDCBP PE=4 SV=1 - [W5Q1W2_SHEEP]	1.67	3	1	1	1	0.807915	1		0.814769	1		1.13381	1		1.31641	1		1.13314	1		360	38.6469	9.34912
W5Q3T9	Uncharacterized protein OS=Ovis aries GN=PDCD6IP PE=4 SV=1 - [W5Q3T9_SHEEP]	1.49	1	1	1	1	0.805408	1		0.692435	1		0.714148	1		0.684924	1		0.618235	1		875	96.7535	6.56592
C5IJ99	RHOA OS=Ovis aries GN=RHOA PE=2 SV=1 - [C5IJ99_SHEEP]	14.51	5	2	2	3	0.805021	3	3.65901	1.07288	3	22.1814	0.879654	3	27.7644	1.14861	3	0.262165	1.00731	3	10.8311	193	21.7541	6.1001
W5QDG7	Uncharacterized protein OS=Ovis aries GN=FN1 PE=4 SV=1 - [W5QDG7_SHEEP]	0.89	2	2	2	3	0.803845	3	35.9646	0.934527	3	0.176214	0.808572	3	31.0017	1.03253	3	23.7599	0.758497	3	23.0314	2478	271.877	5.5415
O46544	Complement component C3 (Fragment) OS=Ovis aries GN=C3 PE=2 SV=1 - [O46544_SHEEP]	23.78	2	1	7	18	0.799386	5	13.9117	0.815983	5	13.8904	0.928502	5	3.91797	0.98593	5	6.02799	0.911893	5	15.5862	349	39.6545	6.55127
W5PWT5	Uncharacterized protein OS=Ovis aries GN=STAG2 PE=4 SV=1 - [W5PWT5_SHEEP]	0.57	2	1	1	11	0.796832	11	28.3726	0.667232	11	20.5849	1.14079	11	19.2789	1.10079	11	10.0084	1.201	11	8.74957	1233	141.462	5.40186
W5PS44	Uncharacterized protein (Fragment) OS=Ovis aries GN=GPRC5B PE=4 SV=1 - [W5PS44_SHEEP]	3.03	1	1	1	1	0.79305	1		1.00212	1		0.746839	1		0.879335	1		1.03492	1		396	43.8638	7.60596
W5PGE9	Uncharacterized protein (Fragment) OS=Ovis aries PE=4 SV=1 - [W5PGE9_SHEEP]	6.53	1	3	3	30	0.791282	30	52.7001	0.727419	30	41.8254	0.726158	30	39.1964	0.719861	30	31.5885	0.860984	30	32.0837	352	37.7128	5.21143
W5P256	Uncharacterized protein OS=Ovis aries GN=LOC101121199 PE=4 SV=1 - [W5P256_SHEEP]	7.39	1	2	2	9	0.79051	9	8.29052	0.895987	9	13.5865	0.647468	9	5.54254	0.687989	9	15.4834	0.606355	9	7.12834	257	29.8293	7.48877
W5PFL8	Tetraspanin (Fragment) OS=Ovis aries GN=CD9 PE=3 SV=1 - [W5PFL8_SHEEP]	8.22	2	2	2	7	0.77946	7	20.0897	0.719685	7	9.49995	0.779473	7	25.3572	0.803211	7	36.4038	1.20666	7	60.8541	219	24.2623	5.37646
W5NPN4	Uncharacterized protein OS=Ovis aries GN=HSPA8 PE=3 SV=1 - [W5NPN4_SHEEP]	16.13	5	7	10	14	0.77735	9	18.8786	0.805181	9	12.111	0.828794	9	47.6689	0.692676	9	52.7835	0.633599	9	57.568	651	71.3875	5.74463
W5P5T4	Uncharacterized protein (Fragment) OS=Ovis aries PE=4 SV=1 - [W5P5T4_SHEEP]	16.09	3	4	14	33	0.77348	10	14.1219	1.12533	10	18.2199	1.15087	10	13.7981	1.1488	10	11.2396	1.10851	10	8.13397	901	102.641	6.25244
A0A059VBM8	Membrane cofactor protein OS=Ovis aries GN=CD46 PE=2 SV=1 - [A0A059VBM8_SHEEP]	1.67	3	1	1	1	0.764447	1		0.55462	1		0.552668	1		0.813312	1		0.516401	1		360	39.0251	6.91748
W5P3D6	Uncharacterized protein (Fragment) OS=Ovis aries PE=4 SV=1 - [W5P3D6_SHEEP]	8.09	2	1	1	1	0.753672	1		1.0351	1		0.556741	1		0.418728	1		0.478588	1		136	14.6624	9.01221
W5PZM9	Annexin OS=Ovis aries GN=ANXA5 PE=3 SV=1 - [W5PZM9_SHEEP]	3.54	1	1	1	1	0.747933	1		0.945131	1		0.800484	1		0.336609	1		0.374276	1		339	38.0635	4.98291
W5NVX6	Tetraspanin OS=Ovis aries GN=TSPAN1 PE=3 SV=1 - [W5NVX6_SHEEP]	2.49	1	1	1	2	0.74668	2	1.29066	0.599339	2	27.0788	0.82401	2	32.1168	1.10185	2	48.9765	0.73892	2	26.4497	241	26.1309	6.25244
R4R2H5	Beta-casein (Fragment) OS=Ovis aries PE=4 SV=1 - [R4R2H5_SHEEP]	88.89	1	2	4	670	0.739815	9	32.4536	0.585921	9	54.7188	0.338772	9	191.413	0.636318	9	42.2998	0.595194	9	71.9794	45	4.97483	9.70068
W5NTK7	Uncharacterized protein (Fragment) OS=Ovis aries GN=C15orf27 PE=4 SV=1 - [W5NTK7_SHEEP]	2.57	1	1	1	1	0.734942	1		4.41225	1		2.01646	1		1.3087	1		1.15322	1		506	55.7348	4.86865
W5NU23	Uncharacterized protein OS=Ovis aries GN=FUCA2 PE=4 SV=1 - [W5NU23_SHEEP]	1.93	2	1	1	1	0.733634	1		0.616845	1		0.662273	1		0.759638	1		1.12313	1		467	53.6289	6.53662
W5PD15	Elongation factor 1-alpha OS=Ovis aries GN=LOC100125610 PE=3 SV=1 - [W5PD15_SHEEP]	7.58	14	4	4	7	0.727981	7	19.963	1.11775	7	20.0363	0.596489	7	9.15945	0.418387	7	24.7328	0.52468	7	11.383	462	50.1091	9.01221
W5QG24	Uncharacterized protein (Fragment) OS=Ovis aries GN=PPT1 PE=4 SV=1 - [W5QG24_SHEEP]	4.89	1	1	1	1	0.721747	1		0.46423	1		0.634698	1		0.626376	1		0.600737	1		307	34.1313	6.7124
W5P9V5	Uncharacterized protein OS=Ovis aries PE=4 SV=1 - [W5P9V5_SHEEP]	28.52	2	19	19	141	0.720604	140	33.5219	0.718447	140	32.3438	0.871286	140	25.4975	1.16599	140	21.4609	1.00811	140	22.5765	782	85.4237	7.75244
P29701	Alpha-2-HS-glycoprotein OS=Ovis aries GN=AHSG PE=1 SV=1 - [FETUA_SHEEP]	13.74	2	5	5	13	0.707127	13	8.41925	1.00796	13	28.0249	1.41433	13	20.2605	0.96747	13	21.0886	1.1042	13	34.19	364	38.6554	5.37646
W5NUV1	Uncharacterized protein OS=Ovis aries GN=GNB1 PE=4 SV=1 - [W5NUV1_SHEEP]	3.53	2	1	1	3	0.686856	3	8.52457	0.685591	3	10.6748	0.830848	3	8.48149	0.797841	3	2.57255	0.660002	3	7.27197	340	37.353	5.99854
P0CG55	Polyubiquitin-B OS=Ovis aries GN=UBB PE=2 SV=1 - [UBB_SHEEP]	40.66	12	3	3	7	0.680128	7	9.59571	0.641814	7	6.65472	0.771625	7	15.3403	0.696814	7	24.8758	0.7725	7	42.6902	305	34.3054	7.47412
W5P0U9	Uncharacterized protein (Fragment) OS=Ovis aries GN=ANGPTL4 PE=4 SV=1 - [W5P0U9_SHEEP]	3.49	1	1	1	1	0.677798	1		0.590837	1		0.72731	1		0.824596	1		0.920292	1		315	35.7171	9.21729
W5P601	Uncharacterized protein OS=Ovis aries GN=STOM PE=4 SV=1 - [W5P601_SHEEP]	14.7	1	3	3	6	0.675473	6	10.7482	0.700009	6	11.3213	0.631237	6	22.7245	0.650644	6	23.6543	0.604033	6	5.128	279	30.9443	7.04932
W5PPH6	Uncharacterized protein OS=Ovis aries GN=RPS3 PE=3 SV=1 - [W5PPH6_SHEEP]	8.9	1	2	2	2	0.674426	2	2.77165	0.693403	2	46.504	0.423151	2	29.1527	0.405987	2	22.6649	0.393781	2	15.1066	281	31.0269	10.272
W5NWX6	Uncharacterized protein (Fragment) OS=Ovis aries GN=APOC3 PE=4 SV=1 - [W5NWX6_SHEEP]	14.55	1	1	1	2	0.670373	2	9.80646	0.976241	2	86.9973	0.845727	2	11.5725	0.65467	2	10.5614	0.702451	2	16.6888	110	12.1821	6.06201
W5PBM7	Uncharacterized protein OS=Ovis aries GN=SCPEP1 PE=4 SV=1 - [W5PBM7_SHEEP]	1.99	2	1	1	1	0.667676	1		0.698393	1		0.826899	1		0.751122	1		0.726498	1		452	50.6628	6.02393
C7DLN1	Fatty acid synthase (Fragment) OS=Ovis aries GN=FASN PE=4 SV=1 - [C7DLN1_SHEEP]	17.5	2	2	2	2	0.665562	2	11.9267	1.70008	2	6.80599	1.13359	2	14.1643	0.783107	2	11.7472	0.784887	2	17.8417	80	9.2259	8.5874
W5PQH0	Uncharacterized protein OS=Ovis aries GN=ANPEP PE=4 SV=1 - [W5PQH0_SHEEP]	2.35	2	2	2	2	0.660707	2	2.98509	0.41928	2	4.77444	0.357928	2	4.03576	0.303788	2	24.8801	0.482452	2	12.3857	936	105.997	5.50342
Q8HY29	Lipopolysaccharide receptor (Fragment) OS=Ovis aries GN=cd14 PE=2 SV=1 - [Q8HY29_SHEEP]	7.55	3	1	1	1	0.656074	1		0.887251	1		0.986771	1		0.941045	1		1.42754	1		106	10.9667	7.07861
K4P494	Cystatin C OS=Ovis aries GN=CST3 PE=2 SV=1 - [K4P494_SHEEP]	5.48	2	1	1	2	0.651899	2	27.3367	0.862457	2	21.8421	0.982258	2	23.8752	0.995525	2	36.7407	1.22289	2	25.7303	146	16.1464	9.24658
W5PAC0	Uncharacterized protein OS=Ovis aries GN=TMEM59 PE=4 SV=1 - [W5PAC0_SHEEP]	2.78	1	1	1	1	0.649626	1		1.14014	1		1.23412	1		1.67969	1		1.02951	1		324	36.1987	4.93213
W5NT95	Uncharacterized protein OS=Ovis aries GN=ATP6AP2 PE=4 SV=1 - [W5NT95_SHEEP]	2.29	2	1	1	2	0.63582	2	8.60779	0.81675	2	28.0012	0.842276	2	27.0441	0.809757	2	50.6463	1.20636	2	29.3584	349	39.2204	6.04932
Q7M2U8	Apolipoprotein E OS=Ovis aries GN=APOE PE=2 SV=1 - [APOE_SHEEP]	20.25	2	6	6	7	0.634029	7	15.306	0.569377	7	32.234	0.408763	7	43.8115	0.405856	7	70.9499	0.419493	7	57.2415	316	36.1927	5.68115
W5PDJ7	Uncharacterized protein OS=Ovis aries PE=3 SV=1 - [W5PDJ7_SHEEP]	3.82	8	1	1	1	0.633416	1		0.969799	1		0.638751	1		0.453367	1		1.10756	1		262	30.1222	9.29053
W5PUV9	Uncharacterized protein OS=Ovis aries GN=RDX PE=4 SV=1 - [W5PUV9_SHEEP]	3.1	3	1	2	2	0.63234	1		0.904212	1		0.659131	1		0.552187	1		0.549114	1		581	68.3592	6.3667
W5QH54	Uncharacterized protein OS=Ovis aries GN=FETUB PE=4 SV=1 - [W5QH54_SHEEP]	2.58	1	1	1	2	0.631337	2	41.3732	0.642217	2	29.8514	1.12034	2	34.8978	1.15606	2	42.5687	1.05383	2	40.6594	387	42.5632	7.44482
H9CJU6	14-3-3 protein zeta/delta OS=Ovis aries GN=YWHAZ PE=2 SV=1 - [H9CJU6_SHEEP]	12.65	17	1	3	5	0.628934	1		0.911487	1		0.625972	1		0.440507	1		0.463169	1		245	27.7118	4.79248
W5Q5G8	Transketolase OS=Ovis aries GN=TKT PE=3 SV=1 - [W5Q5G8_SHEEP]	1.44	1	1	1	2	0.626077	2	0.6844	0.934114	2	1.34302	0.765592	2	9.88059	0.572775	2	20.4595	0.742194	2	2.67468	623	67.8177	7.47412
W5Q0Q1	Uncharacterized protein (Fragment) OS=Ovis aries GN=YWHAQ PE=4 SV=1 - [W5Q0Q1_SHEEP]	12.35	13	1	3	5	0.619468	1		0.757294	1		0.533548	1		0.496078	1		0.443897	1		251	28.2879	4.79248
W5QAR8	Uncharacterized protein OS=Ovis aries GN=OLFM3 PE=4 SV=1 - [W5QAR8_SHEEP]	1.67	1	1	1	1	0.617333	1		0.953515	1		1.42604	1		2.4399	1		1.61199	1		478	54.9516	8.14795
M4WED3	Cell division cycle 42 OS=Ovis aries GN=CDC42 PE=2 SV=1 - [M4WED3_SHEEP]	5.24	2	1	1	2	0.613522	2	20.2683	0.57137	2	2.82201	0.638216	2	7.72673	0.547777	2	7.49481	0.607003	2	1.70793	191	21.211	6.55127
W5P448	Uncharacterized protein OS=Ovis aries GN=GAPDHS PE=3 SV=1 - [W5P448_SHEEP]	2.97	1	1	1	1	0.60375	1		0.86854	1		0.890547	1		1.13034	1		1.12577	1		370	39.9937	7.6792
W5PRJ4	Uncharacterized protein (Fragment) OS=Ovis aries GN=VCP PE=3 SV=1 - [W5PRJ4_SHEEP]	1.48	1	1	1	1	0.603518	1		0.750231	1		0.589569	1		0.542025	1		0.50098	1		812	89.8771	5.32568
W5NXW9	Uncharacterized protein (Fragment) OS=Ovis aries GN=IGHM PE=4 SV=1 - [W5NXW9_SHEEP]	30.26	1	11	11	65	0.593169	65	26.5071	0.456207	65	45.5197	0.421727	65	57.9012	0.41555	65	65.0364	0.437662	65	61.1592	456	49.8654	5.68115
W5PMM7	Protein disulfide-isomerase (Fragment) OS=Ovis aries GN=PDIA3 PE=3 SV=1 - [W5PMM7_SHEEP]	8.24	2	4	4	4	0.592782	4	35.1578	0.578445	4	24.8436	0.431501	4	35.4237	0.472233	4	51.5884	0.486919	4	63.2653	449	50.8777	6.99072
W5PPQ8	Uncharacterized protein OS=Ovis aries GN=JCHAIN PE=4 SV=1 - [W5PPQ8_SHEEP]	45.91	1	6	6	19	0.585561	19	40.4609	0.665381	19	30.0405	0.654811	19	61.6371	0.647319	19	74.9618	0.813909	19	53.2973	159	18.1321	6.93213
W5PHW0	Uncharacterized protein OS=Ovis aries GN=HSP90AB1 PE=3 SV=1 - [W5PHW0_SHEEP]	4.56	4	3	3	3	0.569877	2	6.85492	1.01633	2	8.2202	0.724762	2	25.3759	0.448802	2	17.5386	0.532119	2	35.991	724	83.2011	5.03369
W5QC34	Alpha-mannosidase OS=Ovis aries GN=MAN2A1 PE=3 SV=1 - [W5QC34_SHEEP]	1.14	1	1	1	1	0.565936	1		0.469643	1		0.511738	1		0.502887	1		0.494859	1		1144	130.401	7.59131
G8FRI7	Superoxide dismutase [Cu-Zn] (Fragment) OS=Ovis aries PE=2 SV=1 - [G8FRI7_SHEEP]	6.02	3	1	1	1	0.564526	1		0.759046	1		0.843106	1		0.679927	1		0.636685	1		133	13.8129	6.31592
W5NUE3	Uncharacterized protein OS=Ovis aries GN=PRDX1 PE=4 SV=1 - [W5NUE3_SHEEP]	6.61	2	2	2	2	0.554064	2	4.16162	1.07721	2	155.063	0.571505	2	2.62615	0.469134	2	3.73646	0.592846	2	9.12536	242	27.1128	8.90967
W5QGM9	Uncharacterized protein OS=Ovis aries GN=MFI2 PE=3 SV=1 - [W5QGM9_SHEEP]	3.38	1	2	2	2	0.552416	2	48.8851	0.902932	2	10.3936	0.845267	2	64.0992	0.479267	2	6.73275	0.55619	2	48.5818	739	80.5085	5.89697
W5PN88	Uncharacterized protein (Fragment) OS=Ovis aries GN=EEF2 PE=4 SV=1 - [W5PN88_SHEEP]	0.93	2	1	1	1	0.543714	1		1.09153	1		0.850627	1		0.569912	1		0.671976	1		859	95.391	6.82959
W5NX95	Uncharacterized protein OS=Ovis aries PE=4 SV=1 - [W5NX95_SHEEP]	4.4	1	1	1	1	0.53534	1		0.580558	1		0.681553	1		0.570351	1		0.540426	1		182	19.4497	8.06006
A2P2I3	VH region (Fragment) OS=Ovis aries GN=VH PE=2 SV=1 - [A2P2I3_SHEEP]	7.04	1	1	1	9	0.532431	9	32.5942	0.660904	9	18.6111	0.589293	9	12.931	0.778149	9	15.3827	0.69065	9	7.0797	142	15.0516	8.77783
W5QI15	Uncharacterized protein OS=Ovis aries PE=4 SV=1 - [W5QI15_SHEEP]	11.72	1	1	1	2	0.532234	2	115.313	0.306496	2	105.3	0.300466	2	68.188	0.332386	2	32.8733	0.225987	2	81.4736	128	13.9491	9.29053
P60713	Actin, cytoplasmic 1 OS=Ovis aries GN=ACTB PE=2 SV=1 - [ACTB_SHEEP]	24.8	15	8	8	14	0.528235	13	38.9649	0.943821	13	30.2417	0.645724	13	32.4544	0.689966	13	59.1621	0.581333	13	58.9902	375	41.7097	5.47803
W5Q927	CD59 glycoprotein OS=Ovis aries GN=CD59 PE=4 SV=1 - [W5Q927_SHEEP]	4.92	1	1	1	1	0.522682	1		0.466674	1		0.557552	1		0.55855	1		0.430942	1		122	13.6868	7.47412
W5P8R7	Uncharacterized protein OS=Ovis aries GN=FCGBP PE=4 SV=1 - [W5P8R7_SHEEP]	0.75	1	2	2	2	0.519634	2	38.0457	0.559285	2	49.6918	0.39669	2	34.1975	0.48051	2	5.72164	0.468925	2	16.7333	2544	271.079	4.90674
W5PM94	Uncharacterized protein OS=Ovis aries GN=ACSS2 PE=4 SV=1 - [W5PM94_SHEEP]	1.14	2	1	1	1	0.509162	1		0.63974	1		0.530409	1		0.536604	1		0.590704	1		701	78.7555	6.45557
W5PLB7	Peptidoglycan-recognition protein OS=Ovis aries GN=PGLYRP1 PE=3 SV=1 - [W5PLB7_SHEEP]	10.73	1	2	2	13	0.503668	13	29.9723	0.418776	13	46.3523	0.292093	13	49.7937	0.26683	13	65.792	0.286766	13	60.2745	205	22.6175	9.31982
W5PHP6	Uncharacterized protein OS=Ovis aries PE=4 SV=1 - [W5PHP6_SHEEP]	6.3	1	1	1	1	0.479524	1		0.974427	1		0.539059	1		0.397221	1		0.458927	1		127	14.562	10.2573
P12303	Transthyretin OS=Ovis aries GN=TTR PE=2 SV=1 - [TTHY_SHEEP]	6.8	1	1	1	1	0.467379	1		0.489235	1		0.453997	1		0.506689	1		0.491097	1		147	15.761	5.85889
W5P0V6	Uncharacterized protein OS=Ovis aries GN=SCCPDH PE=4 SV=1 - [W5P0V6_SHEEP]	3.02	1	1	1	1	0.466792	1		0.464625	1		1.17742	1		0.702038	1		0.94197	1		430	46.7439	8.93896
W5QHZ8	Uncharacterized protein (Fragment) OS=Ovis aries PE=4 SV=1 - [W5QHZ8_SHEEP]	12.31	1	2	2	2	0.411481	2	129.64	0.387883	2	121.008	0.367863	2	564.649	0.311334	2	248.015	0.251755	2	429.249	130	14.3212	8.30908
W5NTD9	Chitinase-3-like protein 1 OS=Ovis aries GN=CHI3L1 PE=3 SV=1 - [W5NTD9_SHEEP]	3.97	2	2	2	3	0.410176	3	15.4425	1.19704	3	8.34776	0.273242	3	46.2448	0.294335	3	14.0289	0.438568	3	26.9219	453	50.6027	9.34912
W5QAL0	Uncharacterized protein OS=Ovis aries GN=PRKCSH PE=4 SV=1 - [W5QAL0_SHEEP]	3.92	1	2	2	2	0.389527	2	33.7949	0.44386	2	20.2649	0.323057	2	51.0881	0.36832	2	61.6249	0.422627	2	100.529	536	60.4412	4.4624
W5P673	Uncharacterized protein (Fragment) OS=Ovis aries GN=PDPR PE=3 SV=1 - [W5P673_SHEEP]	1.06	1	1	1	1	0.380086	1		0.296089	1		0.202491	1		0.207077	1		0.253716	1		851	95.9163	6.37939
W5PK06	Uncharacterized protein (Fragment) OS=Ovis aries GN=LOC101106730 PE=4 SV=1 - [W5PK06_SHEEP]	3.2	2	1	1	1	0.37148	1		0.284835	1		0.334578	1		0.319165	1		0.346667	1		250	28.23	8.04541
W5PSP9	Uncharacterized protein (Fragment) OS=Ovis aries PE=4 SV=1 - [W5PSP9_SHEEP]	12.6	3	2	2	11	0.361701	11	57.4695	0.310249	11	50.1251	0.461254	11	23.8159	0.321794	11	50.5429	0.432952	11	46.5716	127	12.9723	7.97217
W5PH95	Uncharacterized protein (Fragment) OS=Ovis aries PE=4 SV=1 - [W5PH95_SHEEP]	13.58	2	6	6	188	0.360939	188	73.9635	0.278293	188	87.7398	0.396739	188	73.3023	0.32862	188	90.2211	0.339485	188	73.5571	464	50.4284	6.60986
W5Q3H4	Uncharacterized protein (Fragment) OS=Ovis aries PE=4 SV=1 - [W5Q3H4_SHEEP]	3.08	2	1	1	1	0.359351	1		0.515216	1		0.366435	1		0.279926	1		0.217509	1		260	28.4136	8.5874
W5NV14	Uncharacterized protein OS=Ovis aries PE=4 SV=1 - [W5NV14_SHEEP]	4.65	1	1	1	5	0.356449	5	17.225	0.29128	5	38.311	0.367211	5	24.9039	0.414133	5	29.3388	0.416381	5	24.2986	172	17.705	9.34912
W5PSQ7	Uncharacterized protein OS=Ovis aries PE=4 SV=1 - [W5PSQ7_SHEEP]	38.3	2	10	10	356	0.337049	356	56.2256	0.284383	356	61.7266	0.359024	356	58.6874	0.311023	356	75.6318	0.348653	356	76.7247	235	25.1364	6.17627
W5Q524	Uncharacterized protein OS=Ovis aries GN=PAPOLA PE=4 SV=1 - [W5Q524_SHEEP]	3.52	2	1	1	1	0.333579	1		0.527008	1		0.508151	1		0.608147	1		1.64403	1		739	82.3218	7.37158
B3F206	Cryptochrome 1 OS=Ovis aries PE=2 SV=1 - [B3F206_SHEEP]	1.36	2	1	1	1	0.328453	1		0.339034	1		0.421585	1		0.311918	1		0.374567	1		587	66.4115	8.00146
W5PFM6	Uncharacterized protein OS=Ovis aries GN=IQCD PE=4 SV=1 - [W5PFM6_SHEEP]	1.32	1	1	1	1	0.312433	1		0.252129	1		0.367833	1		0.302825	1		0.327263	1		456	52.8211	9.18799
W5PGT9	Uncharacterized protein OS=Ovis aries GN=IGHE PE=4 SV=1 - [W5PGT9_SHEEP]	7.01	1	2	2	2	0.297415	2	29.2642	0.206854	2	115.22	0.29057	2	102.924	0.310529	2	101.797	0.176721	2	46.8366	371	41.8799	7.40088
W5NUN9	Uncharacterized protein OS=Ovis aries GN=MORF4L1 PE=4 SV=1 - [W5NUN9_SHEEP]	3.8	2	1	1	1	0.267327	1		0.174824	1		0.202291	1		0.202961	1		0.234636	1		158	18.5663	7.06396
W5QHZ5	Uncharacterized protein OS=Ovis aries PE=4 SV=1 - [W5QHZ5_SHEEP]	19.01	1	3	3	27	0.220835	27	40.256	0.187401	27	46.3415	0.201054	27	33.9179	0.249616	27	23.9873	0.182451	27	52.5068	242	26.6444	8.29443
W5PXV3	Uncharacterized protein (Fragment) OS=Ovis aries GN=CTGF PE=4 SV=1 - [W5PXV3_SHEEP]	5.12	2	1	1	1	0.164268	1		0.0610575	1		0.0614458	1		0.0763776	1		0.0599672	1		254	28.1912	8.00146
