# Supplementary material for: Exploration of ovine milk whey proteome during postnatal development using an iTRAQ approach
Source: PeerJ. 2020 Oct 8;8:e10105. doi: 10.7717/peerj.10105 (PMC7548079; doi:10.7717/peerj.10105)
Supplement: Supplemental Information 2 [file peerj-08-10105-s002.xlsx]

## Sheet: Sheet1
Sequence	# PSMs	# Proteins	# Protein Groups	Protein Group Accessions	Modifications	3d/0d	3d/0d Count	3d/0d Variability [%]	7d/0d	7d/0d Count	7d/0d Variability [%]	14d/0d	14d/0d Count	14d/0d Variability [%]	28d/0d	28d/0d Count	28d/0d Variability [%]	56d/0d	56d/0d Count	56d/0d Variability [%]	IonScore	Charge	MH+ [Da]	ΔM [ppm]	# Missed Cleavages
lAFNPTQLEGQcHV	190	2	1	P67975	N-Term(iTRAQ8plex); C12(Carbamidomethyl)	0.946955	189	16.1979	0.837587	189	18.3421	1.09721	189	23.7387	1.42391	189	18.4411	1.63691	189	23.1403	109.03	2	1917.97	-3.33959	0
aNNNDNTFNQVSEDLR	1	1	1	W5Q5H8	N-Term(iTRAQ8plex)	3.04774	1		3.37355	1		2.54851	1		2.00495	1		1.63794	1		103.93	2	2155.03	-1.36198	0
yLLFcMENSAEPEQSLAcQcLVR	93	3	1	P67975	N-Term(iTRAQ8plex); C5(Carbamidomethyl); C18(Carbamidomethyl); C20(Carbamidomethyl)	0.948834	93	17.7728	0.982771	92	19.4227	1.15848	92	20.0731	1.51654	93	19.6127	1.60698	93	22.5192	101.66	3	3122.47	-1.02997	0
vFPLVScVSSPSDENTVALGcLAR	9	1	1	W5NXW9	N-Term(iTRAQ8plex); C7(Carbamidomethyl); C21(Carbamidomethyl)	0.592281	9	20.9472	0.407535	9	27.6658	0.279586	9	43.576	0.26923	9	68.8699	0.307697	9	39.6902	101.27	3	2882.46	-1.69875	0
fQSEEQQQTEDELQDk	180	2	1	P11839	N-Term(iTRAQ8plex); K16(iTRAQ8plex)	2.90743	179	26.6793	1.56483	179	20.2525	1.03003	179	25.5147	1.96808	179	25.3557	1.53601	179	24.3659	98.2	2	2590.27	0.402305	0
iVSDISEGQVETVQSSPTTYR	9	1	1	W5NXW9	N-Term(iTRAQ8plex)	0.76304	9	38.8087	0.650985	9	52.088	0.606092	9	78.8906	0.75883	9	88.9414	0.603654	9	143.674	91.12	2	2600.34	-0.0978653	0
dMPIQAFLLYQEPVIGPVR	486	3	2	R4R2H5;P11839	N-Term(iTRAQ8plex)																87.91	2	2490.37	-1.25544	0
fLDDDLTDDIVcAk	200	1	1	W5QD52	N-Term(iTRAQ8plex); C12(Carbamidomethyl); K14(iTRAQ8plex)	1.48671	200	16.7624	1.30429	200	18.2801	1.93078	200	21.5996	2.36543	200	23.495	1.4706	200	18.8471	87.84	2	2248.16	-2.4514	0
cTTLISSEGYVSDDYVGR	6	1	1	W5P9V5	N-Term(iTRAQ8plex); C1(Carbamidomethyl)	0.799625	6	14.88	0.872076	6	9.36824	0.900235	6	11.5925	1.2895	6	18.8503	1.08047	6	15.705	84	2	2326.12	0.942	0
yGTTTSQLDADGSYFLYSR	61	1	1	W5PH95	N-Term(iTRAQ8plex)	0.457108	61	33.075	0.369399	61	37.2493	0.486354	61	28.1051	0.454807	61	45.0317	0.422934	61	36.9485	83.21	2	2449.18	-2.13035	0
iTGLDPAGPNFEYAEAPSR	3	1	1	Q29524	N-Term(iTRAQ8plex)	1.11753	3	7.0043	0.932439	3	3.56754	0.993448	3	9.57424	1.35517	3	9.42626	1.11061	3	2.23576	82.14	3	2309.16	-3.32924	0
cQEILEVDcSASSPTQTLLR	4	2	1	W5PZI1	N-Term(iTRAQ8plex); C1(Carbamidomethyl); C9(Carbamidomethyl)	1.09664	4	18.1275	3.08875	4	2.31759	0.752681	4	6.98868	1.05043	4	40.362	0.791874	4	36.8707	82.07	3	2611.29	-2.96108	0
hQGLSPEVLNENLLR	408	4	2	D2DRB7;G3LUQ4	N-Term(iTRAQ8plex)																81.91	3	2023.12	-1.61271	0
yPVEPFTESQSLTLTDVEk	711	2	1	P11839	N-Term(iTRAQ8plex); K19(iTRAQ8plex)	1.232	707	13.9951	1.21823	707	16.2672	2.20731	707	17.4221	2.71415	707	19.564	3.0252	707	19.2924	80.49	2	2791.47	-5.89193	0
dmPIQAFLLYQEPVLGPVR	94	3	2	P11839;R4R2H5	N-Term(iTRAQ8plex); M2(Oxidation)																79.6	2	2506.37	0.0995472	0
yLLFcmENSAEPEQSLAcQcLVR	36	3	1	P67975	N-Term(iTRAQ8plex); C5(Carbamidomethyl); M6(Oxidation); C18(Carbamidomethyl); C20(Carbamidomethyl)	1.11429	33	18.5063	0.94475	34	29.7914	1.17088	34	27.9361	1.36848	34	28.0953	1.47862	34	24.4176	77.89	2	3138.47	0.93039	0
dLYANTVLSGGTTMYPGIADR	1	4	1	P60713	N-Term(iTRAQ8plex)	0.820157	1		1.36164	1		0.968826	1		0.892591	1		1.18113	1		76.51	2	2519.27	-0.183131	0
nQPEPTVEEIEDAFQGNLcR	6	1	1	W5PMT0	N-Term(iTRAQ8plex); C19(Carbamidomethyl)	1.12821	6	12.31	0.837815	6	19.1284	0.763462	6	13.4682	0.835451	6	18.0523	0.674248	6	12.2831	75.37	3	2650.27	-1.01573	0
dIGSESIEDQAMEDAk	16	5	2	G3LUQ4;P04653	N-Term(iTRAQ8plex); K16(iTRAQ8plex)																73.52	2	2346.16	-1.01674	0
aLNEINQFYQk	259	7	4	E7BQS5;P04654;E7BQS3;E7BQS2	N-Term(iTRAQ8plex); K11(iTRAQ8plex)																72.94	2	1976.1	-2.9158	0
iLLQGTPVAEMAEDAIDGER	3	1	1	O46544	N-Term(iTRAQ8plex)	0.799386	3	4.60803	0.971706	3	12.8473	0.928502	3	1.07252	0.98593	3	6.02799	0.911893	3	0.361879	71.87	3	2432.26	-2.90712	0
lVETALTPDScYPD	7	1	1	W5PPQ8	N-Term(iTRAQ8plex); C11(Carbamidomethyl)	0.708597	7	30.1325	0.719422	7	16.973	0.992759	7	48.0229	0.908051	7	25.971	1.02146	7	25.2839	71.31	2	1884.92	-1.07422	0
vGGNAGAYGAEALER	2	4	1	C6ZP47	N-Term(iTRAQ8plex)	2.26654	2	41.7713	0.470769	2	224.667	0.572986	2	75.1906	0.651343	2	66.8664	0.807573	2	45.8664	71.24	2	1738.9	-1.67663	0
sSVTFDcSLGPEVADTAk	26	1	1	W5P9V5	N-Term(iTRAQ8plex); C7(Carbamidomethyl); K18(iTRAQ8plex)	0.653901	26	45.9042	0.636682	26	46.5524	0.809847	26	17.5532	1.06583	26	19.283	0.885374	26	18.1212	71.23	2	2492.27	-5.33496	0
qDSEGLVAVQLADQDR	2	2	1	W5P5I0	N-Term(iTRAQ8plex)	1.1116	2	11.6894	1.02538	2	17.8927	0.772608	2	24.2544	0.720895	2	17.6603	0.582642	2	88.4747	70.76	2	2048.05	-1.32658	0
aDGSTINQNVk	58	1	1	W5PSQ7	N-Term(iTRAQ8plex); K11(iTRAQ8plex)	0.250388	58	39.4105	0.198785	58	39.8006	0.259703	58	35.4071	0.225296	58	50.3411	0.243465	58	38.5161	70.33	2	1754.99	2.18705	0
yGETAAVYVAVESR	9	1	1	W5P9V5	N-Term(iTRAQ8plex)	1.05389	8	29.9092	0.867403	8	13.6961	0.859039	8	12.5542	1.25159	8	12.3524	1.09252	8	18.1557	69.91	3	1818.95	-2.32008	0
sPIFGPEEVTSVEGR	4	1	1	W5P9V5	N-Term(iTRAQ8plex)	1.19865	4	26.2609	0.855004	4	7.2663	1.11323	4	27.5287	1.48929	4	48.2148	1.23386	4	15.6748	69.47	2	1908	-3.02626	0
tVMENFVAFVDk	24	2	2	P14639;W5PWE9	N-Term(iTRAQ8plex); K12(iTRAQ8plex)																69.34	2	2008.09	-5.45616	0
hQGLSSEVLNENLLR	1	1	1	P04653	N-Term(iTRAQ8plex)	0.930745	1		0.889623	1		0.899136	1		0.793659	1		8.50895	1		67.62	3	2013.1	-1.38413	0
vLVLDTDYk	413	3	1	P67975	N-Term(iTRAQ8plex); K9(iTRAQ8plex)	1.21129	413	14.7064	1.13453	413	30.0134	1.67183	413	39.739	2.93781	413	49.3497	2.70136	413	50.8665	67.2	2	1673.99	-4.42165	0
hGEYGFQNALIVR	8	2	2	P14639;W5PWE9	N-Term(iTRAQ8plex)																67.07	3	1807.97	-1.42903	0
eccHGDLLEcADDR	36	2	2	P14639;W5PWE9	N-Term(iTRAQ8plex); C2(Carbamidomethyl); C3(Carbamidomethyl); C10(Carbamidomethyl)																66.85	2	2053.86	-1.78585	0
lSSPAQSQTQLNLSTLLVNPEGPTLTR	1	1	1	W5Q6U0	N-Term(iTRAQ8plex)	1.0524	1		2.2138	1		1.90852	1		1.7098	1		1.64724	1		66.66	3	3169.74	0.171218	0
vTGIITQGAR	10	2	1	W5PNP1	N-Term(iTRAQ8plex)	1.09123	10	8.0129	1.04015	10	19.2746	0.888631	10	36.9463	0.899661	10	22.2352	0.80979	10	44.457	66.65	3	1319.79	-0.475208	0
aDDSDPVGGEFLAEGGGVR	2	1	1	P68214	N-Term(iTRAQ8plex)	0.930484	2	37.5842	2.26797	2	11.429	1.58571	2	28.0905	0.98046	2	36.3774	0.793352	2	174.502	66.36	2	2152.05	0.0459455	0
yLGYLEQLLR	48	5	3	D2DRB7;G3LUQ4;P04653	N-Term(iTRAQ8plex)																66.21	3	1571.91	-1.98413	0
sSLIcQATDFSPk	7	1	1	W5NXW9	N-Term(iTRAQ8plex); C5(Carbamidomethyl); K13(iTRAQ8plex)	0.713308	7	31.4069	0.700844	7	43.4895	0.726317	7	53.6467	0.674144	7	23.4283	0.682191	7	41.6633	66.12	3	2062.11	-1.85347	0
lcTTScEEVVR	123	4	3	E7BQS5;P04654;E7BQS2	N-Term(iTRAQ8plex); C2(Carbamidomethyl); C6(Carbamidomethyl)																65.88	3	1657.82	-1.99012	0
gDSVAYGLk	19	2	1	Q9XSY9	N-Term(iTRAQ8plex); K9(iTRAQ8plex)	1.82138	19	35.7571	1.86899	19	22.7321	2.75878	19	43.2247	5.12823	19	61.7011	3.90672	19	48.707	64.6	2	1517.88	-0.909544	0
eEIVYDLNPLDPR	1	3	1	W5NUX8	N-Term(iTRAQ8plex)	1.31869	1		1.35967	1		1.48	1		1.78521	1		1.25266	1		64.23	2	1876.99	-1.7912	0
gPFPILV	108	1	1	P11839	N-Term(iTRAQ8plex)	1.58612	101	35.7712	1.52842	101	41.5403	2.53666	100	40.0228	3.18061	101	38.5448	4.34517	101	39.3663	64.04	2	1046.65	-0.342563	0
iIPSAEDPSQDIVER	6	1	1	W5PPQ8	N-Term(iTRAQ8plex)	0.469943	6	17.4007	0.446987	6	31.0421	0.455984	6	17.9306	0.389331	6	9.10105	0.457179	6	18.3869	63.99	2	1973.05	0.563259	0
sAEAVLGEALTDFSLR	1	2	1	W5PJZ2	N-Term(iTRAQ8plex)	0.583004	1		0.718547	1		0.574885	1		0.697621	1		0.622253	1		63.95	3	1983.07	-0.456018	0
mPcTEDYLSLILNR	16	2	2	P14639;W5PWE9	N-Term(iTRAQ8plex); C3(Carbamidomethyl)																63.38	3	2029.04	-0.823577	0
sINPDEAVAYGAAVQAAILSGDk	2	2	1	W5NPN4	N-Term(iTRAQ8plex); K23(iTRAQ8plex)	1.13456	2	28.4474	0.843836	2	9.10851	1.54378	2	39.3765	1.16036	2	26.4825	1.04037	2	20.2259	63.36	3	2868.54	-5.22402	0
dLLFSDDTEcLANLQDR	3	1	1	W5PFC9	N-Term(iTRAQ8plex); C10(Carbamidomethyl)	1.00317	3	7.77888	0.813502	3	4.80704	1.13465	3	27.7291	1.1184	3	6.33202	1.03203	3	21.7864	63.32	3	2329.14	3.31765	0
fELLGcELDGcTEPLGLk	11	2	1	W5PNP1	N-Term(iTRAQ8plex); C6(Carbamidomethyl); C11(Carbamidomethyl); K18(iTRAQ8plex)	0.683925	11	16.5555	0.473378	11	27.1534	0.56612	11	32.1549	0.696371	11	23.2579	0.636426	11	38.7029	62.87	3	2659.39	-2.89056	0
tITSVAVTSALPIIQk	2	1	1	A6ZE99	N-Term(iTRAQ8plex); K16(iTRAQ8plex)	1.06921	2	5.09737	1.06733	2	6.04314	0.993483	2	21.433	1.05618	2	0.132619	1.04728	2	5.05979	62.45	2	2250.38	-2.01213	0
sPAQTLQWQVLPNAVPAk	150	5	1	P02669	N-Term(iTRAQ8plex); K18(iTRAQ8plex)	1.12701	148	15.1442	1.17799	148	25.7046	1.87982	148	37.9917	1.84354	148	27.963	2.26548	148	34.1972	62.4	3	2556.47	-3.0149	0
iINEPTAAAIAYGLDR	1	4	1	W5PG95	N-Term(iTRAQ8plex)	1.03788	1		0.970522	1		0.75767	1		0.633178	1		0.776478	1		62.2	3	1992.12	5.10824	0
qPMIAVNQELAYFYPQLFR	19	5	3	D2DRB7;G3LUQ4;P04653	N-Term(iTRAQ8plex)																62.18	3	2632.39	-1.55102	0
vDGVTQNSNFQNSFTDQDSk	5	1	1	W5QHZ5	N-Term(iTRAQ8plex); K20(iTRAQ8plex)	0.385292	5	36.7164	0.493095	5	64.5943	0.5114	5	34.4559	0.459385	5	9.23772	0.494066	5	46.1074	62.15	3	2839.39	-3.25658	0
dAFAADMVLPDSFDAR	3	2	1	S5FR89	N-Term(iTRAQ8plex)	0.982238	3	14.2891	0.592548	3	31.5586	0.677136	3	32.867	0.661972	3	19.2833	0.747682	3	41.3053	62.06	2	2045	0.564397	0
vQNATLAVANITNADSATR	2	1	1	W5P601	N-Term(iTRAQ8plex)	1.03648	2	62.2216	0.854587	2	25.4931	0.723287	2	13.6898	0.875607	2	13.7501	0.742551	2	35.4539	61.92	2	2234.2	-0.172894	0
yNVPQLEIVPk	391	5	3	D2DRB7;G3LUQ4;P04653	N-Term(iTRAQ8plex); K11(iTRAQ8plex)																61.73	2	1908.13	-4.51813	0
iNLFDSPLEVQYVR	14	2	1	W5PNP1	N-Term(iTRAQ8plex)	0.837057	14	19.1014	0.615239	14	18.5596	0.610765	14	23.3849	0.76415	14	16.4717	0.712728	14	19.2915	61.72	3	1997.09	-7.35796	0
dALSSVQESQVAQQAR	2	1	1	W5NWX6	N-Term(iTRAQ8plex)	0.670373	2	9.80646	0.976241	2	86.9973	0.845727	2	11.5725	0.65467	2	10.5614	0.702451	2	16.6888	61.46	2	2021.05	-1.62343	0
lYTLQDGTQVADVVMNR	2	1	1	W5Q6U0	N-Term(iTRAQ8plex)	0.862407	2	2.77218	1.20171	2	3.05611	0.738695	2	16.3396	0.702607	2	1.20395	0.770104	2	14.2521	61.37	3	2227.17	2.2137	0
iHGFDLAAINLQR	4	2	1	Q9MZY2	N-Term(iTRAQ8plex)	1.98797	4	27.196	2.07271	4	6.12987	2.79466	4	13.3803	2.32084	4	6.26516	1.95544	4	29.6872	60.59	3	1772.01	-2.26326	0
eVELEDQVVTASQSNIcDR	1	1	1	W5PPQ8	N-Term(iTRAQ8plex); C17(Carbamidomethyl)	1.06886	1		0.811286	1		1.17555	1		1.55834	1		1.8469	1		60.58	3	2496.21	-2.81068	0
dIGSESIEDQAmEDAk	3	5	2	G3LUQ4;P04653	N-Term(iTRAQ8plex); M12(Oxidation); K16(iTRAQ8plex)																60.57	3	2362.15	-1.08498	0
vYSYYNLDETcIR	3	1	1	W5P5T4	N-Term(iTRAQ8plex); C11(Carbamidomethyl)	0.970983	3	2.26371	1.26486	3	2.33159	1.19701	3	4.67309	1.24511	3	1.90221	1.2526	3	7.1164	60.54	2	1999.98	1.9507	0
qSLEASLAETEGR	1	1	1	W5Q160	N-Term(iTRAQ8plex)	3.19109	1		1.23272	1		2.2749	1		2.83291	1		4.48827	1		60.27	2	1694.88	-1.66433	0
lIPLQPSQGVP	9	2	2	W5NPT7;Q6RUR7	N-Term(iTRAQ8plex)																59.79	2	1452.87	-1.73067	0
dTNTFVHGNSDDIR	4	1	1	W5PTZ8	N-Term(iTRAQ8plex)	1.08555	4	16.9137	1.12674	4	4.39911	1.40762	4	13.6207	1.47359	4	32.3438	1.75951	4	39.3652	59.79	2	1894.92	1.03812	0
iLLQGTPVAEmAEDAIDGER	2	1	1	O46544	N-Term(iTRAQ8plex); M11(Oxidation)	0.682341	2	38.6543	0.776762	2	6.52779	0.764758	2	33.573	0.761852	2	40.5831	0.772888	2	41.6698	59.14	2	2448.25	-4.64488	0
lVASTQAALA	40	2	2	P14639;W5PWE9	N-Term(iTRAQ8plex)																58.87	2	1248.74	-2.56063	0
sSYTcEVTHEGSTVTk	84	1	1	W5PSQ7	N-Term(iTRAQ8plex); C5(Carbamidomethyl); K16(iTRAQ8plex)	0.322048	84	40.44	0.280159	84	48.9051	0.365369	84	41.5728	0.30618	84	53.2107	0.324684	84	60.2787	58.87	2	2394.21	0.143492	0
lGcGEGGcGAcTVMLSk	11	1	1	W5PMT0	N-Term(iTRAQ8plex); C3(Carbamidomethyl); C8(Carbamidomethyl); C11(Carbamidomethyl); K17(iTRAQ8plex)	0.986332	11	13.1928	0.802479	11	13.2243	0.911278	11	15.2663	0.905956	11	14.3146	0.945153	11	25.0195	58.8	3	2365.16	-1.36661	0
lFVSGAcDASAk	3	2	1	W5NUV1	N-Term(iTRAQ8plex); C7(Carbamidomethyl); K12(iTRAQ8plex)	0.686856	3	8.52457	0.685591	3	10.6748	0.830848	3	8.48149	0.797841	3	2.57255	0.660002	3	7.27197	58.58	3	1834	-0.665477	0
eYEATLEDccAk	46	2	2	P14639;W5PWE9	N-Term(iTRAQ8plex); C9(Carbamidomethyl); C10(Carbamidomethyl); K12(iTRAQ8plex)																58.4	2	2097.01	-0.37914	0
kAPQVSTPTLVEISR	59	2	2	P14639;W5PWE9	N-Term(iTRAQ8plex); K1(iTRAQ8plex)																58.21	3	2234.33	-2.60964	1
sAEEQLHSMk	227	5	3	D2DRB7;G3LUQ4;P04653	N-Term(iTRAQ8plex); K10(iTRAQ8plex)																58.19	2	1767.95	-1.80618	0
dSYVGDEAQSk	2	7	1	P60713	N-Term(iTRAQ8plex); K11(iTRAQ8plex)	0.420444	2	0.753112	0.686155	2	19.1202	0.396906	2	11.7849	0.334308	2	33.3438	0.423851	2	17.3283	57.99	2	1806.93	0.151548	0
ccESASEDcMPk	1	2	1	W5PTG9	N-Term(iTRAQ8plex); C1(Carbamidomethyl); C2(Carbamidomethyl); C9(Carbamidomethyl); K12(iTRAQ8plex)	0.691322	1		0.941943	1		1.20898	1		0.93234	1		0.857142	1		57.89	2	2081.92	-3.01367	0
eTIQGITDPLLk	33	2	1	W5PJR5	N-Term(iTRAQ8plex); K12(iTRAQ8plex)	1.27099	33	15.9938	2.16568	33	25.977	1.29223	33	20.9459	1.76568	33	24.8625	2.50148	33	29.039	57.8	3	1936.15	-4.81047	0
lGcGEGGcGAcTVmLSk	2	1	1	W5PMT0	N-Term(iTRAQ8plex); C3(Carbamidomethyl); C8(Carbamidomethyl); C11(Carbamidomethyl); M14(Oxidation); K17(iTRAQ8plex)	1.0214	2	40.857	0.842406	2	32.674	0.875423	2	36.4803	0.794832	2	19.6743	0.832081	2	28.5334	57.53	3	2381.15	0.137273	0
tESSTVTPTAPGETR	1	3	1	Q9XT27	N-Term(iTRAQ8plex)	1.2	1		1.65398	1		2.12554	1		1.14722	1		1.04962	1		57.52	2	1837.94	-2.00649	0
lEPQIAVANTYAck	5	1	1	A6ZE99	N-Term(iTRAQ8plex); C13(Carbamidomethyl); K14(iTRAQ8plex)	0.900287	5	8.37123	0.89118	5	7.99086	0.836242	5	13.769	0.730176	5	2.15519	0.731861	5	7.3058	57.49	3	2186.21	-1.97772	0
gVQVETISPGDGR	1	1	1	W5Q3X2	N-Term(iTRAQ8plex)	1.1188	1		1.19302	1		0.941364	1		0.922529	1		0.953458	1		57.07	2	1618.86	-5.10558	0
vSETEMDVAk	1	1	1	W5PRG8	N-Term(iTRAQ8plex); K10(iTRAQ8plex)	1.4131	1		1.48693	1		1.63336	1		1.09496	1		1.24978	1		56.78	2	1716.93	0.0745164	0
sGGSTTSQSPGLEMcVPDR	2	2	1	C8BKD1	N-Term(iTRAQ8plex); C15(Carbamidomethyl)	1.0635	2	30.0797	1.01287	2	14.0316	1.1304	2	14.3646	0.726387	2	0.223161	0.650638	2	3.65238	56.55	2	2270.08	3.37906	0
gQETISQLHSNFNLIELAR	1	1	1	A6ZE99	N-Term(iTRAQ8plex)	0.989008	1		0.726279	1		0.785805	1		0.721775	1		0.718857	1		56.48	3	2474.32	-2.81684	0
qVELALWDTAGQEDYDR	2	4	1	C5IJ99	N-Term(iTRAQ8plex)	0.981439	2	30.0234	0.99644	2	10.9908	0.802416	2	13.6888	1.01163	2	18.9948	0.929356	2	11.9842	56.25	3	2313.13	0.254686	0
tcVADESHAGcDk	35	2	2	P14639;W5PWE9	N-Term(iTRAQ8plex); C2(Carbamidomethyl); C11(Carbamidomethyl); K13(iTRAQ8plex)																56.06	2	2057.97	-6.60005	0
nTDGSGQVIVSLGVPR	2	1	1	W5NUX8	N-Term(iTRAQ8plex)	1.48497	2	13.2894	1.32131	2	7.79595	1.13086	2	40.4663	0.986532	2	39.4798	0.751272	2	3.53982	55.82	2	1903.06	0.898026	0
tPEVDNEALEk	217	3	1	P67975	N-Term(iTRAQ8plex); K11(iTRAQ8plex)	0.89118	217	14.8541	0.885153	216	37.5414	1.28344	217	46.2342	1.71653	217	35.0004	1.68274	217	39.9133	55.62	2	1853	-3.68546	0
vTYEDLPAIITIEDAIk	6	1	1	W5PMT0	N-Term(iTRAQ8plex); K17(iTRAQ8plex)	0.884821	6	8.89396	0.674837	6	2.0247	0.635386	6	13.3725	0.711269	6	11.074	0.730556	6	27.5176	55.51	3	2512.43	-1.20845	0
aLLEMQQMk	12	1	1	W5Q5H8	N-Term(iTRAQ8plex); K9(iTRAQ8plex)	1.53886	12	11.7754	1.87106	12	15.5585	1.80404	12	20.7146	1.27805	12	22.2825	1.22093	12	12.7128	55.33	3	1699.96	-3.07225	0
sLFPPASEVVkP	74	1	1	W5Q3I2	N-Term(iTRAQ8plex); K11(iTRAQ8plex)	1.10844	74	14.0091	0.992393	74	18.1819	1.41547	74	17.8742	2.17956	74	22.241	2.10052	74	26.924	54.93	3	1879.11	-2.75446	0
eEVPAADLSDQVPDTESETk	7	1	1	W5NPK5	N-Term(iTRAQ8plex); K20(iTRAQ8plex)	0.877938	7	12.4082	1.05074	7	13.4491	1.49483	7	14.4356	1.18759	7	33.3135	0.827151	7	85.8788	54.92	3	2768.37	-6.72606	0
gAATGVNVVcSLR	2	1	1	W5PU70	N-Term(iTRAQ8plex); C10(Carbamidomethyl)	1.11601	2	19.5786	1.54317	2	36.5741	1.5552	2	38.4906	1.33568	2	60.3601	1.80564	2	55.3168	54.87	2	1607.88	-2.68488	0
qTALVELLk	27	1	1	P14639	N-Term(iTRAQ8plex); K9(iTRAQ8plex)	1.05782	26	17.5871	1.32205	26	25.6545	1.89035	26	35.4168	1.45741	26	24.0135	1.63478	26	16.8253	54.87	2	1623.03	-2.82251	0
qAQQAMDAHLQR	4	2	1	W5PZI1	N-Term(iTRAQ8plex)	1.05312	4	14.0586	2.38185	4	18.2813	0.869323	4	27.7358	0.691459	4	20.8001	0.735233	4	17.572	54.74	3	1700.88	-2.92197	0
gLIDEVNQDFTGR	3	1	1	W5Q5H8	N-Term(iTRAQ8plex)	1.38245	3	5.55605	1.41604	3	16.19	1.40866	3	15.5765	1.07508	3	46.4926	1.07382	3	45.9127	54.74	3	1767.92	-1.16783	0
vPLSDSGmYVcQAGDDAk	8	1	1	W5P9V5	N-Term(iTRAQ8plex); M8(Oxidation); C11(Carbamidomethyl); K18(iTRAQ8plex)	0.748249	8	19.4565	0.651484	8	18.5838	0.801872	8	11.6105	1.24434	8	13.0348	1.08216	8	12.1529	54.73	3	2537.24	-1.82143	0
gLGDVDQLVk	21	1	1	Q29524	N-Term(iTRAQ8plex); K10(iTRAQ8plex)	1.48091	21	15.9829	1.13574	21	10.5798	1.55565	21	13.2477	2.15208	21	16.4453	1.86378	21	15.5326	54.56	2	1651.98	-1.32825	0
vPLSDSGMYVcQAGDDAk	13	1	1	W5P9V5	N-Term(iTRAQ8plex); C11(Carbamidomethyl); K18(iTRAQ8plex)	0.776192	13	21.931	0.662415	13	7.32873	0.88792	13	21.8541	1.22581	13	18.4873	1.1532	13	16.4621	54.3	3	2521.24	-3.38989	0
mMQLMSSGVENALTR	3	1	1	A6ZE99	N-Term(iTRAQ8plex)	1.17107	3	27.831	1.21229	3	10.2739	1.13744	3	17.621	1.28525	3	13.4128	1.20985	3	28.5239	54.23	3	1971.99	-4.65382	0
vGINYWLAHk	79	2	2	W5QD52;P09462	N-Term(iTRAQ8plex); K10(iTRAQ8plex)																53.97	3	1809.05	-4.56401	0
sNVYLQVLEPEPELVYR	2	1	1	W5P9V5	N-Term(iTRAQ8plex)	0.701064	2	0.353101	0.774303	2	8.48122	0.999213	2	5.92948	1.42445	2	1.13478	1.20921	2	4.04223	53.95	2	2352.27	-1.2953	0
lGVEFDETTADDR	7	3	1	W5NU39	N-Term(iTRAQ8plex)	1.27067	7	8.91013	1.57853	7	25.5516	1.43548	7	10.6359	1.24904	7	27.9601	1.22119	7	19.0335	53.92	3	1771.86	-1.21908	0
aSSIMDELFQDR	5	2	1	W5PZI1	N-Term(iTRAQ8plex)	0.864057	5	3.52192	2.06772	5	14.9587	0.978132	5	18.6353	0.680193	5	57.7995	0.51287	5	94.1847	53.73	2	1715.85	-2.66128	0
fVVAPFPEVFR	312	5	3	D2DRB7;G3LUQ4;P04653	N-Term(iTRAQ8plex)																53.66	3	1611.92	-2.28629	0
aAQNLLAcGAAR	8	1	1	W5PLB7	N-Term(iTRAQ8plex); C8(Carbamidomethyl)	0.537694	8	18.8938	0.403757	8	48.8202	0.277779	8	48.2655	0.244825	8	52.5926	0.274884	8	37.1022	53.64	3	1519.83	-1.2223	0
dSVTSTITGVVDR	16	1	1	A6ZE99	N-Term(iTRAQ8plex)	1.01175	16	24.0467	0.812541	16	30.3682	0.719664	16	16.8956	0.685295	16	38.296	0.74248	16	31.0486	53.63	3	1653.9	-0.571709	0
nAGPFTPTVNR	148	6	4	E7BQS5;P04654;E7BQS3;E7BQS2	N-Term(iTRAQ8plex)																53.26	3	1477.8	-1.06646	0
sIcSTTNIQck	5	1	1	W5PTS4	N-Term(iTRAQ8plex); C3(Carbamidomethyl); C10(Carbamidomethyl); K11(iTRAQ8plex)	1.33332	5	19.2128	1.73756	5	7.74744	2.4551	5	12.6706	2.76077	5	11.5368	3.32383	5	11.0606	53.23	2	1920.01	-1.434	0
iPAFGSIPTEFR	5	2	1	W5PMT0	N-Term(iTRAQ8plex)	0.831312	5	18.4142	0.522214	5	11.0537	0.520349	5	40.3608	0.573543	5	18.187	0.47026	5	9.22122	53.07	3	1638.92	-0.370397	0
eALQGITDPLFk	7	2	1	P42819	N-Term(iTRAQ8plex); K12(iTRAQ8plex)	1.59069	7	17.2106	1.23539	7	38.3044	0.9882	7	10.3199	1.29055	7	6.41314	1.24122	7	42.7719	53.04	3	1940.13	1.88213	0
ePQVYVLAPPQEELSk	116	2	1	W5PH95	N-Term(iTRAQ8plex); K16(iTRAQ8plex)	0.263968	116	54.5849	0.196241	116	61.3704	0.257398	116	54.2388	0.227503	116	70.6431	0.265112	116	77.8555	52.98	3	2435.36	-0.910598	0
scQDQPTAmAR	55	5	1	P02669	N-Term(iTRAQ8plex); C2(Carbamidomethyl); M9(Oxidation)	1.28572	55	16.2511	1.31101	55	29.1895	1.70226	55	38.3482	1.90852	55	31.355	2.3737	55	34.5112	52.88	2	1584.74	-1.28536	0
gGSVTVScPYNPk	11	1	1	W5P9V5	N-Term(iTRAQ8plex); C8(Carbamidomethyl); K13(iTRAQ8plex)	0.713013	11	50.1064	0.684159	11	45.5243	0.838588	11	24.6275	1.05179	11	27.6434	0.871595	11	13.1108	52.64	2	1974.05	-2.69683	0
yIcDHQDALSSk	48	2	2	P14639;W5PWE9	N-Term(iTRAQ8plex); C3(Carbamidomethyl); K12(iTRAQ8plex)																52.57	2	2045.05	-5.04445	0
yAASSYLTLTGSEWk	41	1	1	W5PSQ7	N-Term(iTRAQ8plex); K15(iTRAQ8plex)	0.558288	41	22.6931	0.468052	41	39.8722	0.524405	41	25.4995	0.551622	41	31.8629	0.627022	41	35.213	52.52	2	2285.22	-5.14942	0
fDEYFSAGcAPGSQR	2	2	1	W5PF65	N-Term(iTRAQ8plex); C9(Carbamidomethyl)	1.08244	2	21.3016	1.19067	2	42.6414	1.46228	2	47.6827	0.767199	2	7.01125	0.518558	2	31.1628	52.42	2	1995.92	-0.974239	0
sVTEQGAELSNEER	1	5	1	H9CJU6	N-Term(iTRAQ8plex)	0.628934	1		0.911487	1		0.625972	1		0.440507	1		0.463169	1		52.33	2	1852.92	0.0343682	0
mPcTEDYLSLILNR	6	2	2	P14639;W5PWE9	N-Term(iTRAQ8plex); M1(Oxidation); C3(Carbamidomethyl)																52.27	3	2045.03	-1.13611	0
eTIPLQESTLYTQDR	1	1	1	W5QG24	N-Term(iTRAQ8plex)	0.721747	1		0.46423	1		0.634698	1		0.626376	1		0.600737	1		52.18	2	2098.1	-0.246964	0
dASIILGQEQDAFAGGFDR	1	1	1	W5PD71	N-Term(iTRAQ8plex)	1.11194	1		0.905649	1		0.661376	1		0.730379	1		0.72689	1		51.93	3	2314.16	-2.53369	0
sAEEQLHSmk	95	5	3	D2DRB7;G3LUQ4;P04653	N-Term(iTRAQ8plex); M9(Oxidation); K10(iTRAQ8plex)																51.85	2	1783.94	-5.64545	0
aATLSTQVGQPLLDR	1	2	1	Q7M2U8	N-Term(iTRAQ8plex)	0.53837	1		0.311775	1		0.213998	1		0.186842	1		0.16987	1		51.59	2	1874.07	1.59407	0
aGSSSSSEEIVPNSAEQk	2	5	3	D2DRB7;G3LUQ4;P04653	N-Term(iTRAQ8plex); K18(iTRAQ8plex)																51.09	3	2415.25	-0.19615	0
dAVTTTVTGAk	9	1	1	A6ZE99	N-Term(iTRAQ8plex); K11(iTRAQ8plex)	0.972441	9	32.8219	0.980312	9	26.6198	1.07883	9	8.84523	1.00954	9	11.581	0.962766	9	11.2112	50.9	2	1671.97	-2.88979	0
lLLSSLEEAk	18	2	1	W5PZI1	N-Term(iTRAQ8plex); K10(iTRAQ8plex)	1.09192	18	10.3636	2.57763	18	64.4591	1.12661	18	15.6712	1.24964	18	19.8693	1.10981	18	13.4267	50.82	2	1711.04	-4.0672	0
aLQPTIFPVVPR	1	1	1	W5PCL4	N-Term(iTRAQ8plex)	1.45747	1		1.25352	1		1.30854	1		1.59311	1		1.34628	1		50.58	2	1642	-0.876308	0
aLPMHIQLAFNPTQLEGQcHV	12	1	1	Q9XSC0	N-Term(iTRAQ8plex); C19(Carbamidomethyl)	1.22132	12	31.9688	1.80036	12	89.2061	1.58988	12	18.3508	4.71508	12	68.2569	1.73435	12	29.0708	50.32	3	2708.39	-1.80815	0
aPGSASEAFFEQGPTR	1	3	1	Q9XT27	N-Term(iTRAQ8plex)	2.53632	1		1.10186	1		0.958623	1		0.811827	1		0.857609	1		50.08	3	1955.97	-2.42663	0
sVSITcYYPATSVNR	6	1	1	W5P9V5	N-Term(iTRAQ8plex); C6(Carbamidomethyl)	0.979287	6	35.7179	1.01224	6	7.72585	1.40996	6	18.983	1.28634	6	10.4562	1.12922	6	12.772	49.92	2	2022.02	-1.63707	0
eTGGITQLDSFSLDR	1	1	1	W5PU70	N-Term(iTRAQ8plex)	2.02356	1		1.71306	1		2.19148	1		2.15942	1		2.62542	1		49.79	2	1942.99	-4.59883	0
aGVEVTGNVDSk	3	1	1	W5PID9	N-Term(iTRAQ8plex); K12(iTRAQ8plex)	0.791292	3	1.13392	1.08481	3	10.2488	1.10092	3	5.5316	1.30319	3	29.213	1.52762	3	4.23971	49.54	2	1784	1.83787	0
tPDNIDIWIGGNAEPMVER	2	2	1	Q9MZY2	N-Term(iTRAQ8plex)	1.9866	2	7.86006	1.49455	2	20.0404	2.27826	2	42.3499	1.62827	2	18.1121	1.52297	2	13.4764	49.21	2	2431.23	3.18735	0
gSLGGGFSSGGFSGGSFSR	2	1	1	W5Q160	N-Term(iTRAQ8plex)	1.51955	2	53.8934	1.09963	2	42.4187	1.14863	2	35.9888	1.35537	2	32.3911	1.52609	2	13.7374	49.18	3	2011.97	-1.67747	0
yIPIQYVLSR	206	2	1	P02669	N-Term(iTRAQ8plex)	1.13355	206	11.4634	1.08875	206	13.7998	1.4313	206	22.2267	1.40941	206	17.2678	1.85947	206	18.056	49.05	3	1555.92	1.24233	0
vcTLAIIDPGDSDIIR	1	1	1	W5PMC5	N-Term(iTRAQ8plex); C2(Carbamidomethyl)	1.25464	1		1.16818	1		0.864873	1		0.835137	1		0.753714	1		49.02	3	2062.12	0.695539	0
aYSVLTITER	3	1	1	W5NXW9	N-Term(iTRAQ8plex)	0.621268	3	9.07264	0.46065	3	0.438305	0.362116	3	3.64922	0.331286	3	5.67738	0.358972	3	30.0314	48.92	3	1456.83	-1.2001	0
eQLSTSEENSk	32	6	4	E7BQS5;P04654;E7BQS3;E7BQS2	N-Term(iTRAQ8plex); K11(iTRAQ8plex)																48.62	2	1859.97	-7.11113	0
tIDMESTEVFTk	36	6	4	E7BQS5;P04654;E7BQS3;E7BQS2	N-Term(iTRAQ8plex); K12(iTRAQ8plex)																48.56	2	2009.07	-0.896535	0
lQESGPSLVk	9	1	1	A2P2I3	N-Term(iTRAQ8plex); K10(iTRAQ8plex)	0.532431	9	32.5942	0.660904	9	18.6111	0.589293	9	12.931	0.778149	9	15.3827	0.69065	9	7.0797	48.54	2	1665.99	-2.86479	0
vDcGYPEVTPEQcNNR	3	2	1	Q30DP5	N-Term(iTRAQ8plex); C3(Carbamidomethyl); C13(Carbamidomethyl)	1.6168	3	2.76943	1.22274	3	61.6831	0.918534	3	23.9289	1.16283	3	30.5575	0.694072	3	1.77318	48.51	3	2242.02	2.39282	0
vAPLGEEFR	5	1	1	W5NX51	N-Term(iTRAQ8plex)	1.52901	5	20.4638	1.14634	5	4.26903	1.42333	5	2.58658	0.87378	5	32.3692	1.1669	5	48.2415	48.43	3	1321.74	-3.06848	0
sTENTEDVQGcDSDk	3	1	1	W5PSD8	N-Term(iTRAQ8plex); C11(Carbamidomethyl); K15(iTRAQ8plex)	1.29158	3	7.12425	1.01431	3	33.2138	1.48615	3	16.4909	1.22117	3	6.27185	0.948139	3	18.4326	48.32	3	2293.07	1.07506	0
qcVPTEAcEDPEDDcGNNFQcGTGR	1	1	1	W5PID9	N-Term(iTRAQ8plex); C2(Carbamidomethyl); C8(Carbamidomethyl); C15(Carbamidomethyl); C21(Carbamidomethyl)	1.50574	1		1.71216	1		2.5233	1		3.64631	1		2.01097	1		48.32	3	3220.3	0.438538	0
aSVETPEQk	2	1	1	W5PWM0	N-Term(iTRAQ8plex); K9(iTRAQ8plex)	0.792835	2	19.6164	0.741972	2	32.4085	0.87223	2	54.8007	0.717889	2	22.9331	0.852728	2	62.6358	48.3	2	1596.9	-2.22324	0
ePDSNVIVVDWLSR	2	1	1	Q29524	N-Term(iTRAQ8plex)	1.52488	2	32.1838	0.924378	2	16.8997	1.35615	2	20.2497	1.93062	2	25.6204	1.70982	2	9.13277	48.16	3	1933.03	-2.68541	0
nIVSDcSAFVk	1	1	1	W5PCL4	N-Term(iTRAQ8plex); C6(Carbamidomethyl); K11(iTRAQ8plex)	0.880754	1		0.993731	1		0.91386	1		1.08671	1		0.885012	1		48.13	3	1848.01	-3.2447	0
dAGTIAGLNVLR	2	1	1	W5NPN4	N-Term(iTRAQ8plex)	0.707723	2	9.69604	0.778466	2	6.7681	0.711494	2	22.9179	0.571611	2	9.63349	0.543976	2	22.9036	47.82	3	1503.88	-1.87921	0
mWVTGVVTQGASR	10	2	1	W5PNP1	N-Term(iTRAQ8plex)	1.0484	10	14.8669	1.06931	10	16.4579	0.94316	10	19.3478	1.04229	10	18.0685	0.922992	10	27.2736	47.74	3	1695.91	-1.36281	0
qPmIAVNQELAYFYPQLFR	10	5	3	D2DRB7;G3LUQ4;P04653	N-Term(iTRAQ8plex); M3(Oxidation)																47.72	3	2648.38	-0.543462	0
sLVLTTPWIGDER	1	1	1	W5PV41	N-Term(iTRAQ8plex)	1.38267	1		1.54653	1		1.29679	1		1.2396	1		1.29368	1		47.66	2	1790.99	-0.500764	0
scQDQPTAMAR	100	5	1	P02669	N-Term(iTRAQ8plex); C2(Carbamidomethyl)	1.38045	100	21.8134	1.36205	100	19.6723	1.7253	100	20.153	1.96801	100	18.2643	2.17874	100	22.2768	47.62	2	1568.74	-3.06145	0
lAVYQAGASEGAER	2	2	1	Q7M2U8	N-Term(iTRAQ8plex)	0.666691	2	22.9591	0.663799	2	58.0102	0.393109	2	11.7169	0.324959	2	33.874	0.330695	2	36.3885	47.62	2	1725.9	-3.7991	0
nIcNIScDk	59	2	2	W5QD52;P09462	N-Term(iTRAQ8plex); C3(Carbamidomethyl); C7(Carbamidomethyl); K9(iTRAQ8plex)																47.6	2	1731.89	-1.94153	0
vFALSTNLIAIDSR	1	2	2	W5NPK5;O46544	N-Term(iTRAQ8plex)																47.51	2	1824.05	-2.09162	0
eLALcYGGMADR	5	1	1	W5PMT0	N-Term(iTRAQ8plex); C5(Carbamidomethyl)	1.0551	5	29.6168	0.830409	5	6.90568	0.853144	5	31.0928	0.948505	5	7.53584	0.793686	5	12.5308	47.42	3	1659.81	-0.0931341	0
iYFAAEDTDccTR	1	1	1	W5P6B3	N-Term(iTRAQ8plex); C10(Carbamidomethyl); C11(Carbamidomethyl)	0.824423	1		0.528967	1		0.376202	1		0.328511	1		0.235459	1		47.38	2	1925.87	-1.04534	0
sIDVSEAQk	10	1	1	W5PMT0	N-Term(iTRAQ8plex); K9(iTRAQ8plex)	0.903736	10	17.7631	1.04994	10	31.9185	0.739983	10	23.0064	0.826409	10	24.8764	0.746414	10	33.219	47.3	2	1584.89	-7.40051	0
sEQSDLSFSk	17	4	1	A4ZVY8	N-Term(iTRAQ8plex); K10(iTRAQ8plex)	1.31805	17	17.2269	1.11358	17	13.7153	1.45391	17	32.9269	1.93109	17	27.9768	1.78442	17	24.5049	47.3	2	1735.93	-2.86741	0
fSSAETTEMSGk	1	1	1	W5QCV4	N-Term(iTRAQ8plex); K12(iTRAQ8plex)	0.661922	1		0.508177	1		0.663039	1		0.637973	1		1.30516	1		47.15	2	1882.96	-1.55182	0
wLSTSIPESQWQESLAR	1	2	1	W5Q6U0	N-Term(iTRAQ8plex)	1.09467	1		1.43466	1		1.06556	1		0.997912	1		0.865129	1		46.98	2	2322.21	1.55602	0
nADPETTLLAYLR	9	1	1	W5PMT0	N-Term(iTRAQ8plex)	0.882151	9	10.965	0.782833	9	7.67009	0.748432	9	17.8244	0.734837	9	7.12133	0.73573	9	15.1673	46.93	3	1780.97	-2.02014	0
aNQVTDESLESTR	1	1	1	W5QH64	N-Term(iTRAQ8plex)	0.730247	1		0.464303	1		0.433979	1		0.369594	1		0.359408	1		46.87	2	1753.88	-1.60126	0
tGIPIVTSPYQIHFTk	1	1	1	W5NRI1	N-Term(iTRAQ8plex); K16(iTRAQ8plex)	0.543809	1		0.910732	1		1.20517	1		1.0413	1		0.920652	1		46.85	3	2410.39	-2.908	0
vTWIQSSTLk	20	1	1	W5PMT0	N-Term(iTRAQ8plex); K10(iTRAQ8plex)	0.883205	20	10.6401	0.795431	20	12.3529	0.842005	20	8.27476	0.992088	20	12.7052	0.885457	20	11.875	46.65	2	1771.06	0.970227	0
dcGSGVGVIk	2	1	1	W5NSH8	N-Term(iTRAQ8plex); C2(Carbamidomethyl); K10(iTRAQ8plex)	0.831644	2	3.15348	0.782611	2	15.1182	0.769445	2	15.9801	1.33491	2	18.2869	1.0133	2	19.9933	46.47	2	1599.89	-3.58618	0
tDGDGVYTFNSk	2	1	1	W5P0Q4	N-Term(iTRAQ8plex); K12(iTRAQ8plex)	3.00738	2	2.19936	3.83023	2	57.6186	1.69415	2	42.8827	0.949386	2	9.739	0.94976	2	59.7341	46.33	2	1911.99	-3.04309	0
vNVPGSQAQLk	1	1	1	W5PS94	N-Term(iTRAQ8plex); K11(iTRAQ8plex)	0.743976	1		0.701828	1		0.868237	1		1.11695	1		0.917431	1		46.32	2	1749.05	-0.64079	0
qTVAVGVIk	1	9	1	W5PD15	N-Term(iTRAQ8plex); K9(iTRAQ8plex)	0.831815	1		1.1686	1		1.15306	1		0.626176	1		0.642793	1		46.24	2	1522.98	-0.562754	0
eTYGDmADccEk	9	2	2	P14639;W5PWE9	N-Term(iTRAQ8plex); M6(Oxidation); C9(Carbamidomethyl); C10(Carbamidomethyl); K12(iTRAQ8plex)																46.09	2	2102.93	0.143855	0
gccQEEAQFETk	1	1	1	W5PZU1	N-Term(iTRAQ8plex); C2(Carbamidomethyl); C3(Carbamidomethyl); K12(iTRAQ8plex)	0.839719	1		0.902921	1		0.819839	1		0.884308	1		0.912511	1		46.08	3	2095.01	1.39861	0
vYVEELkPTPEGNLEILLQk	53	3	1	P67975	N-Term(iTRAQ8plex); K7(iTRAQ8plex); K20(iTRAQ8plex)	0.795111	53	20.8599	0.821813	53	21.6129	1.16882	53	19.1562	1.68256	53	16.9619	1.65724	53	21.4332	45.97	3	3224.9	1.7769	0
eNINELSk	130	7	3	D2DRB7;G3LUQ4;P04653	N-Term(iTRAQ8plex); K8(iTRAQ8plex)																45.92	2	1554.88	-6.63348	0
aDFTDVTk	38	2	2	P14639;W5PWE9	N-Term(iTRAQ8plex); K8(iTRAQ8plex)																45.83	3	1504.84	-3.63466	0
vLVLDTDYkk	210	3	1	P67975	N-Term(iTRAQ8plex); K9(iTRAQ8plex); K10(iTRAQ8plex)	0.664226	210	12.4682	0.647857	210	17.0237	0.908268	210	11.3321	0.954331	210	12.4603	1.18675	210	11.1025	45.68	2	2106.29	-1.73511	1
vSLVEDHIAEGSVAVR	18	1	1	W5NPT7	N-Term(iTRAQ8plex)	1.28409	18	16.8849	1.04262	18	16.0127	1.11675	18	11.3795	1.0602	18	18.3498	1.26867	18	16.2612	45.65	3	1985.1	-0.314177	0
eGMNIVEAMER	1	3	1	Q864L8	N-Term(iTRAQ8plex)	0.985852	1		1.09215	1		0.844167	1		0.711708	1		0.673753	1		45.56	2	1582.78	-3.45436	0
vDcTANTNTcNk	1	2	1	W5PMM7	N-Term(iTRAQ8plex); C3(Carbamidomethyl); C10(Carbamidomethyl); K12(iTRAQ8plex)	0.623107	1		0.662585	1		0.528391	1		0.644987	1		0.63874	1		45.06	3	2005.98	-2.97652	0
nANTFISPQQR	5	1	1	W5QHS2	N-Term(iTRAQ8plex)	0.941138	5	7.05385	0.615717	5	24.2003	0.342757	5	14.707	0.523826	5	12.2211	0.43054	5	20.3406	44.96	2	1579.85	-0.629826	0
nEEDDMVEMEEER	1	1	1	W5P1C2	N-Term(iTRAQ8plex)	1.51147	1		0.947084	1		1.42515	1		1.67851	1		1.3483	1		44.96	2	1958.82	-0.785543	0
eSASVTcLVk	11	1	1	W5NXW9	N-Term(iTRAQ8plex); C7(Carbamidomethyl); K10(iTRAQ8plex)	0.630711	11	28.6796	0.430981	11	34.6687	0.369009	11	53.9282	0.381712	11	43.5646	0.39582	11	82.8221	44.57	2	1701.97	-0.547326	0
vSPAVFVSR	13	1	1	W5NPT7	N-Term(iTRAQ8plex)	1.00896	13	13.4341	0.776984	13	13.4505	0.863632	13	21.1186	0.880965	13	32.6598	0.744569	13	17.8051	44.31	3	1265.75	-0.502002	0
aGFVcPTPPYQSLAR	4	2	1	Q9MZY2	N-Term(iTRAQ8plex); C5(Carbamidomethyl)	1.79944	4	4.68248	1.44691	4	14.5682	2.04669	4	73.4668	1.26406	4	30.8334	1.58938	4	58.7306	44.31	2	1968.03	0.261541	0
eTYGDMADccEk	23	2	2	P14639;W5PWE9	N-Term(iTRAQ8plex); C9(Carbamidomethyl); C10(Carbamidomethyl); K12(iTRAQ8plex)																44.1	2	2086.93	-0.887808	0
dFLQTENEGNAIDELk	3	1	1	W5PZJ1	N-Term(iTRAQ8plex); K16(iTRAQ8plex)	1.04571	3	3.98088	0.897279	3	12.5292	1.18562	3	8.65595	1.79332	3	9.18343	2.10594	3	16.6783	44.1	3	2444.27	-1.89239	0
aVTEQGAELSNEER	1	1	1	W5Q0Q1	N-Term(iTRAQ8plex)	0.619468	1		0.757294	1		0.533548	1		0.496078	1		0.443897	1		44.07	2	1836.92	-1.4072	0
eNFITFAk	29	1	1	W5PMH6	N-Term(iTRAQ8plex); K8(iTRAQ8plex)	1.32482	29	23.8536	1.13228	29	16.3632	1.80969	29	32.8081	2.23091	29	23.4088	2.18641	29	27.7615	44.05	2	1577.91	-3.35879	0
rNAGPFTPTVNR	9	6	4	E7BQS5;P04654;E7BQS3;E7BQS2	N-Term(iTRAQ8plex)																44.02	3	1633.91	-0.376231	1
vAYSDDGVTWTEYkDPETSk	2	2	1	W5PNP1	N-Term(iTRAQ8plex); K14(iTRAQ8plex); K20(iTRAQ8plex)	0.940824	2	34.8082	0.884721	2	19.1759	0.820711	2	10.2875	0.863787	2	22.3853	0.806515	2	34.4682	43.71	4	3203.65	-1.1136	1
nMAIHPR	130	6	4	E7BQS5;P04654;E7BQS3;E7BQS2	N-Term(iTRAQ8plex)																43.64	3	1142.63	-4.96128	0
iIVTQTMk	334	1	1	P67975	N-Term(iTRAQ8plex); K8(iTRAQ8plex)	0.942191	334	13.7576	0.910822	334	28.0016	1.26984	333	32.9503	1.78624	334	24.1147	1.84418	334	23.9874	43.43	2	1541.95	-2.86031	0
tVTINcPFTSANSQk	10	2	1	W5P9V5	N-Term(iTRAQ8plex); C6(Carbamidomethyl); K15(iTRAQ8plex)	0.740429	10	25.4044	0.778917	10	7.89233	1.00668	10	17.5061	1.21317	10	11.4132	1.16157	10	14.275	43.31	3	2276.21	-2.76164	0
dFLGLSEIk	16	1	1	W5P0U4	N-Term(iTRAQ8plex); K9(iTRAQ8plex)	1.02261	16	10.897	1.06433	16	9.18518	1.23439	16	16.0609	1.31182	16	12.9858	1.23718	16	13.6733	43.29	3	1629.96	-2.18048	0
aLPmHIR	86	2	1	P67975	N-Term(iTRAQ8plex); M4(Oxidation)	0.936372	86	23.2945	0.810833	86	20.9079	1.07638	86	21.5585	1.32514	86	17.559	1.67692	86	13.1085	42.97	3	1157.67	-3.30068	0
iDALNENk	165	3	1	P67975	N-Term(iTRAQ8plex); K8(iTRAQ8plex)	0.899472	165	13.2746	0.913161	165	16.4347	1.22666	165	21.7383	1.81437	165	17.9453	1.83687	165	19.8685	42.93	2	1524.88	-6.00292	0
eGDLTHFNQR	6	1	1	W5PMT0	N-Term(iTRAQ8plex)	1.02924	6	22.057	1.03823	6	25.1655	0.906288	6	25.6277	0.978395	6	30.0717	1.0148	6	38.0166	42.89	3	1520.77	-3.72442	0
sLINDYVk	12	2	2	W5Q0X5;W5Q124	N-Term(iTRAQ8plex); K8(iTRAQ8plex)																42.84	3	1559.92	-0.739681	0
gSQPGNAEGLQk	1	1	1	W5NWM2	N-Term(iTRAQ8plex); K12(iTRAQ8plex)	0.803641	1		1.29138	1		1.71475	1		1.4398	1		1.26968	1		42.72	3	1793.99	-1.29569	0
tESTVEDLk	8	1	1	W5PY10	N-Term(iTRAQ8plex); K9(iTRAQ8plex)	1.52038	8	61.1581	2.08955	8	62.6879	2.44457	8	60.7845	4.08454	8	59.5271	4.11763	8	47.0781	42.67	2	1629.92	1.43135	0
eGNPAHQk	71	5	3	D2DRB7;G3LUQ4;P04653	N-Term(iTRAQ8plex); K8(iTRAQ8plex)																42.61	2	1488.83	-6.70517	0
eNQSVPLESk	3	1	1	W5PY10	N-Term(iTRAQ8plex); K10(iTRAQ8plex)	1.23188	3	21.0202	1.4001	3	10.7881	2.01014	3	7.30204	2.18914	3	4.82774	2.61518	3	19.6537	42.51	2	1738.97	-5.76852	0
tPLPLAGPPR	14	2	2	W5NPT7;Q6RUR7	N-Term(iTRAQ8plex)																42.37	3	1322.81	-2.14041	0
aIVTDGDLPk	3	1	1	W5P559	N-Term(iTRAQ8plex); K10(iTRAQ8plex)	1.36863	3	4.40788	1.19259	3	17.8786	1.23727	3	13.3963	4.28694	3	16.3569	1.26431	3	2.58173	42.29	3	1636.97	-0.170963	0
tPDEEGLFTVR	27	1	1	W5NPT7	N-Term(iTRAQ8plex)	1.05462	27	13.318	0.878043	27	12.2274	0.944545	27	21.4338	0.873739	27	30.1392	0.832736	27	24.9842	42.17	3	1567.83	1.0627	0
vITDPFTk	6	1	1	W5PCT4	N-Term(iTRAQ8plex); K8(iTRAQ8plex)	0.962088	6	3.57861	0.901044	6	3.90301	0.976436	6	7.5092	1.04727	6	6.99906	0.80961	6	23.3081	42.11	2	1528.92	-2.34162	0
fAWPQYLk	261	6	4	E7BQS5;P04654;E7BQS3;E7BQS2	N-Term(iTRAQ8plex); K8(iTRAQ8plex)																42.09	2	1660.96	-3.25942	0
vVEVLAGDGQLYSR	1	1	1	W5Q6U0	N-Term(iTRAQ8plex)	0.773065	1		1.54848	1		0.99094	1		0.73508	1		0.697011	1		42.02	2	1810	-2.15428	0
dVAMkPPSVYVLPPTR	13	1	1	W5NXW9	N-Term(iTRAQ8plex); K5(iTRAQ8plex)	0.559967	13	12.9017	0.395032	13	28.0339	0.356277	13	26.8466	0.426408	13	39.9084	0.448891	13	35.513	41.92	2	2378.38	2.23513	0
tFQDAQQVcTQAGGQLPSPR	1	3	1	Q9XSQ2	N-Term(iTRAQ8plex); C9(Carbamidomethyl)	1.43641	1		1.24243	1		1.67664	1		1.74679	1		2.09829	1		41.87	3	2493.25	0.235748	0
yAMVYGYNAAYDR	2	1	1	W5QHS2	N-Term(iTRAQ8plex)	0.633162	2	8.01623	0.621566	2	26.4609	0.515578	2	8.96092	0.531054	2	9.15651	0.496166	2	11.9321	41.77	3	1860.89	0.0457195	0
qITASSYYk	7	2	1	W5PNP1	N-Term(iTRAQ8plex); K9(iTRAQ8plex)	0.806127	7	15.3165	0.642045	7	24.1957	0.705954	7	18.5665	0.847105	7	30.2106	0.773909	7	26.4878	41.72	2	1668.94	-1.67228	0
aLPMHIR	234	2	1	P67975	N-Term(iTRAQ8plex)	0.862872	234	16.9936	0.773647	234	21.2957	1.00311	234	15.7862	1.28175	234	13.3712	1.54282	234	13.3282	41.64	3	1141.68	-0.850967	0
dDPHAcYATVFDk	20	1	1	W5PWE9	N-Term(iTRAQ8plex); C6(Carbamidomethyl); K13(iTRAQ8plex)	0.908476	20	19.2749	0.821086	20	16.726	1.41692	20	15.2844	1.12627	20	20.2514	0.987175	20	19.1862	41.52	3	2147.06	-2.77401	0
eAQSQLVk	2	1	1	W5NVV6	N-Term(iTRAQ8plex); K8(iTRAQ8plex)	0.86808	2	52.3805	0.915264	2	7.1299	1.03097	2	41.889	1.29307	2	73.3145	1.51658	2	66.7176	41.49	2	1510.9	-2.08505	0
nLLLGQEk	16	1	1	W5NPT7	N-Term(iTRAQ8plex); K8(iTRAQ8plex)	1.13816	16	12.9447	1.02411	16	8.04749	1.24692	16	5.83207	1.20504	16	8.92949	1.16561	16	9.82331	41.49	2	1522.94	-3.68023	0
mPEDcVPTFR	1	1	1	W5PSD8	N-Term(iTRAQ8plex); M1(Oxidation); C5(Carbamidomethyl)	1.52604	1		1.13913	1		1.40639	1		1.10194	1		0.959842	1		41.36	2	1571.74	-8.28015	0
mSAVTGPVPR	5	1	1	W5Q5H8	N-Term(iTRAQ8plex)	1.50929	5	25.9548	1.78493	5	16.5525	1.73152	5	17.0178	1.12533	5	17.6932	1.18438	5	8.39782	41.29	3	1318.74	-1.30674	0
gLPAPIVR	6	2	1	W5PH95	N-Term(iTRAQ8plex)	0.873846	6	16.2322	1.00324	6	29.0149	1.37755	6	31.86	0.532834	6	47.3225	0.827729	6	34.6447	41.28	3	1126.72	-1.46399	0
eGcFVLEGPk	39	2	2	P14639;W5PWE9	N-Term(iTRAQ8plex); C3(Carbamidomethyl); K10(iTRAQ8plex)																41.27	2	1743.95	-3.5842	0
iIPGFMcQGGDFTR	2	3	1	Q864L8	N-Term(iTRAQ8plex); C7(Carbamidomethyl)	0.657795	2	46.2525	0.605117	2	49.773	0.505976	2	65.639	0.459867	2	58.1357	0.476227	2	47.1151	41.2	3	1902.95	0.863114	0
sGWTPAPAcIEIIcDPPR	1	2	1	D6PZY4	N-Term(iTRAQ8plex); C9(Carbamidomethyl); C14(Carbamidomethyl)	0.819939	1		0.858991	1		0.895811	1		0.719353	1		0.739878	1		40.98	3	2344.17	0.434775	0
gPSGSQQDLVk	3	1	1	W5Q6U0	N-Term(iTRAQ8plex); K11(iTRAQ8plex)	0.536534	3	23.4795	1.37094	3	12.5921	0.972382	3	9.45924	0.674494	3	22.0489	0.817136	3	3.19879	40.96	2	1723.98	-1.69665	0
vAIIDTYk	25	2	1	W5Q6N3	N-Term(iTRAQ8plex); K8(iTRAQ8plex)	0.922722	25	11.4375	1.00056	25	11.8566	1.30865	25	11.4712	1.13525	25	14.2888	1.44171	25	14.822	40.8	2	1530.93	-2.90649	0
yIDQEELNk	1	3	1	W5PHW0	N-Term(iTRAQ8plex); K9(iTRAQ8plex)	0.544157	1		0.961605	1		0.612378	1		0.399087	1		0.420509	1		40.69	2	1759.96	-2.6219	0
dQAMEDAk	1	2	1	D2DRB7	N-Term(iTRAQ8plex); K8(iTRAQ8plex)	1.16875	1		0.889446	1		2.00631	1		2.0459	1		2.48888	1		40.63	2	1515.78	-6.34147	0
nANEEEYSIR	9	4	2	E7BQS5;E7BQS2	N-Term(iTRAQ8plex)																40.59	2	1528.75	-3.72488	0
aPQVSTPTLVEISR	2	2	2	P14639;W5PWE9	N-Term(iTRAQ8plex)																40.57	2	1802.03	-1.98833	0
dPPANIQLFQEVPk	6	1	1	W5PMT0	N-Term(iTRAQ8plex); K14(iTRAQ8plex)	0.86216	6	10.5752	0.756407	6	10.2973	0.9277	6	25.7843	0.882248	6	10.3286	0.938146	6	25.6771	40.46	3	2204.25	-2.38455	0
vAGTWHSLAmAASDISLLDAQSAPLR	1	3	1	P67975	N-Term(iTRAQ8plex); M10(Oxidation)	1.52366	1		1.31656	1		1.40696	1		1.29452	1		1.73899	1		40.44	3	3001.57	0.229776	0
aAASFFSAScVPcADQSSFPk	1	1	1	W5PF65	N-Term(iTRAQ8plex); C10(Carbamidomethyl); C13(Carbamidomethyl); K21(iTRAQ8plex)	0.724451	1		0.555479	1		0.742303	1		0.670929	1		0.668996	1		40.33	3	2843.39	-1.40985	0
nIFEVPFQAR	13	1	1	W5PNP1	N-Term(iTRAQ8plex)	0.921743	13	15.2168	0.805343	13	24.556	0.862778	13	65.2695	0.970729	13	47.4482	1.0877	13	47.8342	40.32	3	1524.85	-0.354614	0
rVTGIITQGAR	2	2	1	W5PNP1	N-Term(iTRAQ8plex)	1.30062	2	17.1724	1.15283	2	4.98749	0.895837	2	17.8212	0.942126	2	15.6432	0.925767	2	17.2866	40.27	3	1475.89	-2.99929	1
rPSGVPDR	5	1	1	W5NV14	N-Term(iTRAQ8plex)	0.356449	5	17.225	0.29128	5	38.311	0.367211	5	24.9039	0.414133	5	29.3388	0.416381	5	24.2986	40.18	3	1187.68	0.199181	0
eVPDGLLASSk	14	1	1	A6ZE99	N-Term(iTRAQ8plex); K11(iTRAQ8plex)	1.3428	14	47.7464	1.05927	14	22.7519	1.02801	14	23.2727	1.00783	14	27.8207	0.970764	14	22.3945	40.06	3	1724	-1.53525	0
iGGIGTVPVGR	2	8	1	W5PD15	N-Term(iTRAQ8plex)	0.614546	2	4.93503	1.03312	2	11.714	0.576851	2	14.1741	0.363791	2	4.37034	0.432181	2	11.6247	40.05	3	1329.81	-0.906185	0
lLDEEEATDNDLR	1	1	1	W5Q3T9	N-Term(iTRAQ8plex)	0.805408	1		0.692435	1		0.714148	1		0.684924	1		0.618235	1		40.01	2	1836.91	-0.410649	0
dNccILDER	3	1	1	W5Q5A6	N-Term(iTRAQ8plex); C3(Carbamidomethyl); C4(Carbamidomethyl)	3.02911	3	42.3521	1.72845	3	4.08127	1.51949	3	15.6305	1.08279	3	0.859788	1.08427	3	40.9203	39.93	2	1498.69	-1.0832	0
dAGTIAGLNVMR	2	2	1	W5PTR5	N-Term(iTRAQ8plex)	0.899601	2	37.7175	0.740958	2	2.09359	0.572683	2	6.6944	0.672811	2	28.2205	0.790281	2	21.7376	39.86	3	1521.83	-1.26142	0
aGSAEYVk	7	2	1	W5PNP1	N-Term(iTRAQ8plex); K8(iTRAQ8plex)	0.840199	7	7.1815	0.725657	7	14.7171	0.69328	7	36.1817	0.820869	7	37.3137	0.798425	7	60.1675	39.79	2	1432.82	-4.6021	0
gEAGEMELFASTQNPmk	2	1	1	W5PMT0	N-Term(iTRAQ8plex); M16(Oxidation); K17(iTRAQ8plex)	0.81796	2	5.73553	0.658019	2	5.36831	0.819034	2	2.48444	0.786961	2	10.1355	0.885739	2	13.1535	39.66	3	2464.22	-3.08639	0
dDTGAPITk	1	1	1	W5PCT4	N-Term(iTRAQ8plex); K9(iTRAQ8plex)	1.80579	1		1.07597	1		1.18823	1		1.62919	1		1.02537	1		39.65	2	1525.87	-1.12633	0
aSSImDELFQDR	1	2	1	W5PZI1	N-Term(iTRAQ8plex); M5(Oxidation)	0.774693	1		1.94735	1		0.391911	1		0.412171	1		0.305259	1		39.39	2	1731.85	-3.43627	0
kYNVPQLEIVPk	202	5	3	D2DRB7;G3LUQ4;P04653	N-Term(iTRAQ8plex); K1(iTRAQ8plex); K12(iTRAQ8plex)																39.28	5	2340.43	-4.27734	1
gEEFPSMSESR	8	1	1	W5NPT7	N-Term(iTRAQ8plex)	1.31747	8	11.1814	1.14458	8	2.86614	1.60061	8	4.15153	1.98346	8	14.5798	2.02519	8	3.78256	39.23	2	1559.73	-2.03515	0
dNTVTPVSk	2	1	1	W5QH23	N-Term(iTRAQ8plex); K9(iTRAQ8plex)	1.00829	2	6.59707	0.968713	2	10.9358	1.18667	2	3.86578	1.28604	2	14.5143	1.62719	2	13.8847	39.05	2	1568.91	-0.910285	0
gQEDASSDR	2	1	1	W5NTD9	N-Term(iTRAQ8plex)	0.389481	2	7.68714	1.1445	2	6.66185	0.235543	2	22.2809	0.280799	2	6.98879	0.401138	2	13.2842	38.98	2	1268.59	-5.92883	0
dcQELFEDGER	1	1	1	W5P0U9	N-Term(iTRAQ8plex); C2(Carbamidomethyl)	0.677798	1		0.590837	1		0.72731	1		0.824596	1		0.920292	1		38.93	2	1701.77	2.2221	0
vGDPEELNGIVQALcGSR	1	1	1	W5Q6U0	N-Term(iTRAQ8plex); C15(Carbamidomethyl)	0.859041	1		0.789044	1		0.57169	1		0.701224	1		0.659789	1		38.87	3	2218.12	-11.309	0
vVEGEPSLk	15	1	1	W5P9V5	N-Term(iTRAQ8plex); K9(iTRAQ8plex)	0.704377	15	35.8297	0.6709	15	14.8372	0.825575	15	22.4578	1.13417	15	17.9565	0.990074	15	16.6246	38.76	2	1565.93	-1.29368	0
eTENSYVSLk	1	1	1	W5PD71	N-Term(iTRAQ8plex); K10(iTRAQ8plex)	0.328832	1		0.267234	1		0.300414	1		0.377181	1		0.219042	1		38.6	2	1777.97	-5.10184	0
vGLVAVDk	10	1	1	W5NRI1	N-Term(iTRAQ8plex); K8(iTRAQ8plex)	0.602699	10	24.2992	0.700824	10	26.7349	0.745502	10	10.2296	0.811186	10	8.78633	0.82282	10	10.6582	38.51	2	1408.9	-0.460376	0
gSLIVSGk	2	1	1	W5Q6U0	N-Term(iTRAQ8plex); K8(iTRAQ8plex)	0.669185	2	4.43051	1.21832	2	5.79089	0.92706	2	2.38667	0.741137	2	5.69869	0.761441	2	12.4536	38.28	2	1368.87	-0.60836	0
lTSTPDTSQk	2	2	1	W5P5I0	N-Term(iTRAQ8plex); K10(iTRAQ8plex)	0.828586	2	4.45638	0.881479	2	3.36628	0.755326	2	34.4602	0.603661	2	37.0916	0.473462	2	108.04	38.25	2	1685.95	0.680838	0
acEPGVDYVYk	1	1	1	W5P5T4	N-Term(iTRAQ8plex); C2(Carbamidomethyl); K11(iTRAQ8plex)	0.720629	1		0.94274	1		0.975974	1		1.1021	1		1.09621	1		38.17	2	1909	-1.21105	0
eQEGEEMAEYR	18	1	1	W5NPT7	N-Term(iTRAQ8plex)	1.21301	18	9.52081	1.02169	18	11.4819	1.24469	18	13.5451	1.30328	18	19.3488	1.16445	18	12.3399	38.15	2	1674.75	-4.93429	0
eSQAPALPAQEEIPVPLGG	2	1	1	W5NWM2	N-Term(iTRAQ8plex)	0.57188	2	92.4043	0.819076	2	19.9002	0.912409	2	36.2815	0.655476	2	77.4836	0.508621	2	144	38.04	2	2207.17	-5.3631	0
eQEGEEmAEYR	2	1	1	W5NPT7	N-Term(iTRAQ8plex); M7(Oxidation)	1.12101	2	9.43468	0.928324	2	7.60596	1.24148	2	5.82289	1.31771	2	4.97307	1.20713	2	22.048	37.98	2	1690.75	-4.11823	0
iPLQPNFQADQFQGk	8	1	1	W5PMH6	N-Term(iTRAQ8plex); K15(iTRAQ8plex)	1.40949	8	23.2204	1.15297	8	21.6121	2.03153	8	52.7906	2.4342	8	53.595	2.21753	8	49.1548	37.95	3	2339.29	-3.36287	0
eVNVSPcPTQPck	2	1	1	W5NSH8	N-Term(iTRAQ8plex); C7(Carbamidomethyl); C12(Carbamidomethyl); K13(iTRAQ8plex)	1.03932	2	7.82862	0.842596	2	15.8452	1.14758	2	8.85539	1.07311	2	21.0394	1.0218	2	7.2682	37.91	3	2124.1	-1.3865	0
eLPDPQESIQR	3	1	1	W5PF65	N-Term(iTRAQ8plex)	1.35608	3	45.723	1.58569	3	6.81273	1.443	3	10.4657	0.972749	3	23.5906	0.732146	3	24.2935	37.9	3	1615.86	-2.11105	0
mFAEEDAELMR	1	1	1	W5Q5W1	N-Term(iTRAQ8plex)	0.959956	1		0.827236	1		0.897228	1		0.857683	1		0.894411	1		37.9	2	1645.78	-3.04744	0
gSPAANVGVk	1	1	1	P12303	N-Term(iTRAQ8plex); K10(iTRAQ8plex)	0.467379	1		0.489235	1		0.453997	1		0.506689	1		0.491097	1		37.85	2	1507.9	-2.80703	0
tLLEAVAk	38	1	1	W5PMT0	N-Term(iTRAQ8plex); K8(iTRAQ8plex)	0.87475	38	13.6649	0.8765	38	16.1862	0.691533	38	14.1084	0.796459	38	17.1623	0.727684	38	17.273	37.78	2	1452.92	0.165863	0
tVGPYGETFNk	2	1	1	W5NWM2	N-Term(iTRAQ8plex); K11(iTRAQ8plex)	0.655451	2	9.49302	0.785897	2	21.3505	1.55129	2	13.9637	1.04253	2	17.2162	0.934067	2	14.4368	37.75	3	1821	1.73576	0
tIDmESTEVFTk	13	6	4	E7BQS5;P04654;E7BQS3;E7BQS2	N-Term(iTRAQ8plex); M4(Oxidation); K12(iTRAQ8plex)																37.75	2	2025.06	-2.11577	0
sLAQPLTVPWDPR	1	1	1	W5Q9A2	N-Term(iTRAQ8plex)	1.01385	1		0.677531	1		1.04031	1		0.636474	1		0.968978	1		37.74	2	1784	-0.666991	0
nLENTVk	13	1	1	W5Q3I2	N-Term(iTRAQ8plex); K7(iTRAQ8plex)	1.01925	13	14.7173	1.03027	13	15.3863	1.48449	13	32.564	2.31509	13	33.2089	2.33994	13	30.8571	37.72	2	1425.84	-5.52334	0
dVFLGSFLYEYSR	8	2	2	P14639;W5PWE9	N-Term(iTRAQ8plex)																37.58	2	1899.98	-0.269406	0
lSISETYDLk	6	5	2	I1WXR3;W5PZS7	N-Term(iTRAQ8plex); K10(iTRAQ8plex)																37.56	3	1777.02	0.347723	0
qGFGNIATNAEGk	4	2	1	W5NQ46	N-Term(iTRAQ8plex); K13(iTRAQ8plex)	2.63096	4	52.9746	2.39915	4	44.6399	2.52916	4	49.6337	1.554	4	25.3804	1.23398	4	16.9426	37.55	2	1915.04	-5.75112	0
cVPVVcDSSQESEVR	1	1	1	W5QCV4	N-Term(iTRAQ8plex); C1(Carbamidomethyl); C6(Carbamidomethyl)	0.928222	1		0.671684	1		0.569961	1		0.633231	1		0.647735	1		37.55	2	2054.98	-1.11398	0
rPQDTQYYSPFSSFPR	3	2	1	W5PZI1	N-Term(iTRAQ8plex)	1.27068	3	15.1247	1.66001	3	9.87337	0.898127	3	1.1732	0.840388	3	11.1443	0.86617	3	2.64973	37.54	3	2280.13	-2.41193	0
fGHMEVPSTVSR	9	2	1	Q9MZY2	N-Term(iTRAQ8plex)	1.6698	9	13.5156	1.2791	9	3.84714	1.72769	9	25.3316	1.47604	9	20.7652	1.42916	9	28.1114	37.51	3	1650.85	-2.95363	0
tAVQGLPER	18	1	1	W5PGE9	N-Term(iTRAQ8plex)	0.791282	18	50.13	0.756643	18	44.7132	0.744746	18	28.5284	0.71918	18	31.7391	0.79723	18	25.1479	37.5	2	1274.73	-3.67442	0
yIAPQEAVAAk	9	1	1	W5PZD0	N-Term(iTRAQ8plex); K11(iTRAQ8plex)	1.12539	9	19.1675	1.07906	9	9.01525	1.2925	9	8.70529	2.1348	9	12.68	2.36574	9	22.4871	37.28	3	1769.03	-4.75511	0
ySPTDcISPHk	2	2	1	F5CC79	N-Term(iTRAQ8plex); C6(Carbamidomethyl); K11(iTRAQ8plex)	1.06286	2	0.822577	0.864829	2	6.64476	1.18052	2	7.72523	1.09605	2	0.485455	1.17615	2	3.20702	37.26	3	1913	-4.55279	0
yAmVYGYNAAYDR	1	1	1	W5QHS2	N-Term(iTRAQ8plex); M3(Oxidation)	0.658799	1		0.423791	1		0.227888	1		0.213116	1		0.188834	1		37.13	2	1876.88	-4.45756	0
mLDTSTLLk	18	2	1	W5PZI1	N-Term(iTRAQ8plex); K9(iTRAQ8plex)	1.03866	18	18.1762	3.37723	18	33.4926	1.09894	18	16.6662	1.0394	18	19.2727	0.854299	18	21.5974	37.08	2	1629.96	-5.81249	0
tITLEVEPSDTIENVk	4	7	1	P0CG55	N-Term(iTRAQ8plex); K16(iTRAQ8plex)	0.652536	4	8.81696	0.64935	4	5.05772	0.772628	4	7.83016	0.779285	4	17.437	0.877238	4	26.9055	37.08	3	2396.34	0.970613	0
gAVTGSVEk	5	1	1	A6ZE99	N-Term(iTRAQ8plex); K9(iTRAQ8plex)	0.926619	5	1.8981	0.870404	5	27.7704	0.810765	5	12.0785	0.852373	5	10.9093	0.896249	5	8.65313	37.02	3	1455.86	-4.69941	0
gVGGAQAPEIDR	1	2	1	W5PQH0	N-Term(iTRAQ8plex)	0.64754	1		0.406001	1		0.348321	1		0.257503	1		0.443927	1		36.97	2	1473.79	-2.18679	0
aAAQEQYSAAMAR	2	1	1	W5NRG7	N-Term(iTRAQ8plex)	2.3269	2	20.7598	1.88755	2	15.5098	1.01375	2	19.9959	0.867887	2	14.2971	0.734322	2	1.03799	36.88	2	1671.84	0.685649	0
tVmENFVAFVDk	13	2	2	P14639;W5PWE9	N-Term(iTRAQ8plex); M3(Oxidation); K12(iTRAQ8plex)																36.88	2	2024.1	-0.850297	0
fDDENFILk	1	8	1	Q864L8	N-Term(iTRAQ8plex); K9(iTRAQ8plex)	0.883527	1		1.2274	1		1.15912	1		1.32624	1		1.12956	1		36.8	2	1748.96	-3.13978	0
lMELGHk	44	1	1	W5Q3I2	N-Term(iTRAQ8plex); K7(iTRAQ8plex)	1.08335	44	20.0285	0.965495	44	21.1189	1.58724	44	22.8268	2.25609	44	31.9719	2.39198	44	24.7708	36.76	4	1435.86	0.40554	0
dDQNPHSR	18	2	2	W5QD52;P09462	N-Term(iTRAQ8plex)																36.74	3	1272.62	-1.07444	0
gYLDYDEVDDNR	2	1	1	P68116	N-Term(iTRAQ8plex)	1.02241	2	64.6567	2.0539	2	82.0836	1.94382	2	86.3385	1.617	2	55.2156	1.11622	2	29.5023	36.7	2	1777.81	-5.95481	0
lSINTQNk	3	1	1	W5NRI1	N-Term(iTRAQ8plex); K8(iTRAQ8plex)	0.788226	3	4.34657	0.77471	3	24.8746	0.785611	3	22.4375	0.953082	3	28.4588	1.05829	3	29.5154	36.67	2	1525.91	-5.12136	0
dTETcYTYDR	1	1	1	W5PPQ8	N-Term(iTRAQ8plex); C5(Carbamidomethyl)	0.715912	1		0.681885	1		0.836629	1		1.04236	1		1.08858	1		36.65	2	1627.72	-0.923506	0
tVTNAEGHTETTk	2	1	1	W5Q5H8	N-Term(iTRAQ8plex); K13(iTRAQ8plex)	2.03005	2	2.64481	2.80968	2	0.0574559	2.90294	2	2.33917	1.95722	2	6.26238	1.41515	2	22.2364	36.6	3	1997.07	-5.38871	0
gPGGVWAAk	9	4	2	W5PJR5;W5PJG0	N-Term(iTRAQ8plex); K9(iTRAQ8plex)																36.55	2	1450.85	-6.20738	0
scPEAIDEIFR	1	2	1	W5PFL8	N-Term(iTRAQ8plex); C2(Carbamidomethyl)	1.22473	1		1.06184	1		0.922413	1		1.55835	1		1.26756	1		36.36	2	1640.82	-2.37834	0
yLGPEYLQAIANVR	2	1	1	W5PFC9	N-Term(iTRAQ8plex)	1.10534	2	27.1551	0.95944	2	45.1798	1.11083	2	12.7226	0.987633	2	9.22145	0.999322	2	2.58339	36.35	2	1911.05	-5.0068	0
icSQYAAYGk	1	2	1	W5PTG9	N-Term(iTRAQ8plex); C2(Carbamidomethyl); K10(iTRAQ8plex)	0.617631	1		1.32305	1		1.6018	1		1.89532	1		0.597707	1		36.34	2	1768.94	-4.82817	0
mcLDYPVTk	1	2	1	W5PRX0	N-Term(iTRAQ8plex); C2(Carbamidomethyl); K9(iTRAQ8plex)	0.780801	1		1.14328	1		1.50772	1		1.89065	1		1.59222	1		36.3	2	1734.94	2.33254	0
dFGHIQYVAAYR	3	2	1	W5PNP1	N-Term(iTRAQ8plex)	0.776156	3	1.90723	0.501278	3	2.97876	0.525591	3	1.21714	0.563375	3	9.44362	0.567202	3	1.88773	36.22	3	1743.91	-0.419898	0
rSPALGAANR	4	2	1	Q9MZY2	N-Term(iTRAQ8plex)	1.54493	4	11.7619	1.90166	4	11.8427	2.19593	4	9.09411	1.58007	4	23.0018	2.08281	4	16.4183	36.21	3	1316.77	0.774608	1
vPDVLVADPPTAGLSVSGR	1	2	1	W5Q302	N-Term(iTRAQ8plex)	0.988302	1		0.620584	1		0.916112	1		0.985405	1		1.2315	1		36.2	3	2154.2	-5.11055	0
vAAAITk	4	5	1	C6ZP47	N-Term(iTRAQ8plex); K7(iTRAQ8plex)	1.32743	2	6.55841	0.205211	2	47.29	0.13444	2	81.626	0.307957	2	3.77819	0.400032	2	0.850187	36.08	3	1281.84	1.0435	0
eDQTEYLEER	1	3	1	W5PHW0	N-Term(iTRAQ8plex)	0.596812	1		1.07417	1		0.857772	1		0.504709	1		0.673353	1		36.04	2	1615.77	-1.51417	0
dIcEAQVNSLGPSITk	2	4	3	W5P5T4;W5NPK5;O46544	N-Term(iTRAQ8plex); C3(Carbamidomethyl); K16(iTRAQ8plex)																35.95	3	2340.26	-4.15545	0
sQPTcLPVcGQPSR	4	1	1	W5QH23	N-Term(iTRAQ8plex); C5(Carbamidomethyl); C9(Carbamidomethyl)	1.19001	4	29.3269	1.12394	4	23.5885	1.19987	4	4.6897	1.12615	4	14.8735	1.43026	4	19.4902	35.79	2	1890.94	-1.66488	0
sLSVIPGETASIScR	2	1	1	W5QI15	N-Term(iTRAQ8plex); C14(Carbamidomethyl)	0.532234	2	115.313	0.306496	2	105.3	0.300466	2	68.188	0.332386	2	32.8733	0.225987	2	81.4736	35.79	2	1881	-0.880164	0
tSTADYASFk	3	1	1	W5Q5A6	N-Term(iTRAQ8plex); K10(iTRAQ8plex)	1.86287	3	17.2078	3.13259	3	31.202	3.12611	3	42.9955	1.87916	3	2.45556	1.58835	3	18.6651	35.74	2	1698.91	-0.898845	0
iQPVAWHNR	8	1	1	W5PNP1	N-Term(iTRAQ8plex)	1.05917	8	18.1166	0.769427	8	14.1238	0.751229	8	36.3976	0.830298	8	16.5013	0.852393	8	12.8742	35.72	3	1424.81	-0.0717403	0
sLcEMAEk	6	1	1	A6ZE99	N-Term(iTRAQ8plex); C3(Carbamidomethyl); K8(iTRAQ8plex)	0.761744	6	15.2427	0.823497	6	18.0175	0.818714	6	40.2364	0.833705	6	49.2693	0.915709	6	55.3259	35.68	2	1575.82	-5.14431	0
nIEDALNQLFR	1	1	1	W5PU70	N-Term(iTRAQ8plex)	1.51045	1		2.26169	1		2.31437	1		2.19266	1		2.47326	1		35.42	2	1636.9	3.2705	0
sYELPDGQVITIGNER	1	11	1	P60713	N-Term(iTRAQ8plex)	0.443272	1		0.777426	1		0.522408	1		0.382747	1		0.477882	1		35.42	2	2095.09	-5.65823	0
tNAIPYVR	90	6	4	E7BQS5;P04654;E7BQS3;E7BQS2	N-Term(iTRAQ8plex)																35.35	3	1237.72	-0.0130021	0
sVASIGGNIITASPISDLNPVFMASGTk	2	1	1	W5PMT0	N-Term(iTRAQ8plex); K28(iTRAQ8plex)	0.878863	2	31.6691	0.91852	2	16.4692	1.47597	2	25.8425	1.365	2	65.6355	1.52573	2	59.086	35.28	3	3355.85	1.79947	0
dGAPcVFGGTVYR	1	2	1	W5PXV3	N-Term(iTRAQ8plex); C5(Carbamidomethyl)	0.164268	1		0.0610575	1		0.0614458	1		0.0763776	1		0.0599672	1		35.25	2	1702.86	1.77998	0
tVLGELGINR	2	5	2	I1WXR3;W5PZS7	N-Term(iTRAQ8plex)																35.15	3	1375.82	0.360928	0
eIPLSPmGEDSASGDIETLHSk	2	1	1	Q6RUR7	N-Term(iTRAQ8plex); M7(Oxidation); K22(iTRAQ8plex)	0.841713	2	9.19419	0.648399	2	19.5353	0.74303	2	24.1791	0.733003	2	7.42085	0.721641	2	18.1363	35.11	3	2937.5	0.329123	0
yVEcSALTQk	2	2	1	M4WED3	N-Term(iTRAQ8plex); C4(Carbamidomethyl); K10(iTRAQ8plex)	0.613522	2	20.2683	0.57137	2	2.82201	0.638216	2	7.72673	0.547777	2	7.49481	0.607003	2	1.70793	35.03	3	1806.98	-2.22658	0
dTFADASQR	2	2	1	W5PJZ2	N-Term(iTRAQ8plex)	0.86261	2	3.03842	1.00794	2	24.853	1.96998	2	37.2127	1.63986	2	33.6071	1.30676	2	35.5022	34.77	2	1314.66	-1.35021	0
qGLMPVLESLk	5	1	1	W5NX51	N-Term(iTRAQ8plex); K11(iTRAQ8plex)	1.10431	5	11.8498	1.10819	5	3.0916	1.42069	5	16.9002	1.1009	5	2.40213	1.08695	5	4.47783	34.7	3	1823.09	-3.09989	0
ncELFEk	25	2	2	P14639;W5PWE9	N-Term(iTRAQ8plex); C2(Carbamidomethyl); K7(iTRAQ8plex)																34.68	2	1547.83	-4.83723	0
nHLNFLk	45	1	1	E7BQS5	N-Term(iTRAQ8plex); K7(iTRAQ8plex)	2.48233	45	44.1091	2.95255	45	48.0994	2.57969	45	44.2249	7.53853	45	60.9537	3.5289	45	50.962	34.66	3	1493.9	-2.76548	0
tPWIQVNLLR	3	2	1	W5PNP1	N-Term(iTRAQ8plex)	1.04984	3	3.19891	0.886168	3	15.56	1.02067	3	4.58366	1.13677	3	1.89253	1.05579	3	8.41166	34.6	3	1543.92	-0.822831	0
sIVTLDGGk	8	3	1	W5NU39	N-Term(iTRAQ8plex); K9(iTRAQ8plex)	1.07056	8	11.8081	1.90757	8	23.0994	1.63402	8	26.3118	1.51834	8	10.7764	1.62688	8	11.0664	34.59	3	1497.91	-1.31705	0
qDENYEEAIVHLk	1	1	1	W5NPT7	N-Term(iTRAQ8plex); K13(iTRAQ8plex)	1.32393	1		1.12282	1		1.57943	1		1.87248	1		1.8809	1		34.52	3	2196.19	6.94421	0
vNHVTLTQPk	11	4	1	A4ZVY8	N-Term(iTRAQ8plex); K10(iTRAQ8plex)	1.00565	11	12.4183	0.959526	11	19.6948	1.21733	11	14.4796	1.36502	11	14.6254	1.38176	11	16.8167	34.45	2	1745.05	-2.63824	0
lDQWLcEk	87	2	2	W5QD52;P09462	N-Term(iTRAQ8plex); C6(Carbamidomethyl); K8(iTRAQ8plex)																34.42	2	1699.93	-2.17792	0
vPSHAVVAR	5	2	2	W5PFC9;W5PF65	N-Term(iTRAQ8plex)																34.34	3	1239.75	-1.79664	0
lSPLAQELR	2	1	1	W5NX51	N-Term(iTRAQ8plex)	1.1919	2	5.31126	1.09598	2	13.2463	1.40843	2	3.76776	0.77709	2	12.8356	0.917739	2	0.326607	34.26	3	1330.79	-3.65073	0
dScMGTLVVk	4	1	1	W5NRI1	N-Term(iTRAQ8plex); C3(Carbamidomethyl); K10(iTRAQ8plex)	0.807157	4	14.147	0.951181	4	12.3257	1.052	4	12.9425	1.12906	4	5.82837	1.1519	4	16.5753	34.24	2	1717.94	-1.74853	0
iESQENSk	3	2	1	Q9XSY9	N-Term(iTRAQ8plex); K8(iTRAQ8plex)	2.41335	3	29.6234	2.44759	3	30.6698	2.99351	3	9.58929	5.59388	3	52.4733	4.16505	3	22.2254	34.1	2	1542.85	-4.93612	0
aVFPSIVGRPR	1	7	1	P60713	N-Term(iTRAQ8plex)	0.400372	1		0.509541	1		0.27536	1		0.160396	1		0.1965	1		34.09	3	1502.91	0.278639	0
dVTIADcGk	3	2	1	Q5TIK9	N-Term(iTRAQ8plex); C7(Carbamidomethyl); K9(iTRAQ8plex)	1.02423	3	17.095	0.754363	3	5.60151	0.908765	3	2.69612	1.16189	3	5.2613	1.03	3	23.3275	33.83	3	1586.87	-1.14749	0
iFTDAADLSGVTGTR	2	2	1	W5Q0X5	N-Term(iTRAQ8plex)	1.59203	2	40.6952	1.51621	2	12.8189	1.61911	2	8.06582	1.26681	2	26.7742	1.3322	2	38.1579	33.79	2	1827.98	1.43527	0
eGGQTAPASTR	1	2	1	F2YQ13	N-Term(iTRAQ8plex)	1.97474	1		0.599887	1		1.06425	1		0.87672	1		1.01062	1		33.74	2	1378.72	-0.719466	0
nADEEEYSIR	2	1	1	P04654	N-Term(iTRAQ8plex)	3.47033	2	1.94873	2.07223	2	7.73181	2.16265	2	10.7202	3.12927	2	13.2675	1.82671	2	12.8418	33.72	2	1529.73	-2.77223	0
iSQYYQk	165	6	4	E7BQS5;P04654;E7BQS3;E7BQS2	N-Term(iTRAQ8plex); K7(iTRAQ8plex)																33.72	2	1537.88	-3.78458	0
aAVAADAk	3	1	1	W5PWM0	N-Term(iTRAQ8plex); K8(iTRAQ8plex)	0.735258	3	15.4519	0.622752	3	27.336	0.59788	3	29.847	0.659116	3	6.4351	0.601886	3	74.276	33.7	2	1324.81	0.545046	0
fPLGPVTSTTR	1	1	1	W5P101	N-Term(iTRAQ8plex)	0.936227	1		1.19512	1		1.43643	1		0.914118	1		0.936414	1		33.65	3	1479.84	-1.6823	0
dIMLATGk	3	1	1	W5Q6U0	N-Term(iTRAQ8plex); K8(iTRAQ8plex)	0.770099	3	6.06564	1.40642	3	10.6574	1.11713	3	8.89994	1.01164	3	9.26757	0.962528	3	12.4548	33.64	3	1456.86	-0.524168	0
rPSGIPAR	6	3	1	W5PSP9	N-Term(iTRAQ8plex)	0.627479	6	35.9001	0.341675	6	75.6147	0.455938	6	33.0977	0.376192	6	56.9124	0.677089	6	15.7372	33.52	3	1157.71	-0.192907	0
aTLGATEVk	1	2	1	W5NU23	N-Term(iTRAQ8plex); K9(iTRAQ8plex)	0.733634	1		0.616845	1		0.662273	1		0.759638	1		1.12313	1		33.45	2	1497.91	-2.59161	0
vELLYNPAFcSLATAk	2	3	2	W5P5T4;W5NPK5	N-Term(iTRAQ8plex); C10(Carbamidomethyl); K16(iTRAQ8plex)																33.38	3	2405.34	3.08962	0
gFcGLSQPk	4	2	1	Q9MZY2	N-Term(iTRAQ8plex); C3(Carbamidomethyl); K9(iTRAQ8plex)	1.44251	4	23.3206	1.62697	4	19.8841	2.98183	4	29.0054	1.88417	4	23.669	1.88311	4	3.56728	33.36	2	1601.88	-6.86049	0
lcVLHEk	40	2	2	P14639;W5PWE9	N-Term(iTRAQ8plex); C2(Carbamidomethyl); K7(iTRAQ8plex)																33.33	3	1506.89	-0.613688	0
vQELQDk	5	1	1	W5NX51	N-Term(iTRAQ8plex); K7(iTRAQ8plex)	1.12071	5	12.5936	1.36441	5	23.5254	1.69617	5	24.4728	1.29495	5	4.98052	1.46649	5	11.7068	33.29	2	1467.86	-0.34137	0
sLGLTDDHIIFPVPIDR	5	1	1	W5PMH6	N-Term(iTRAQ8plex)	1.25968	5	16.3504	1.0755	5	19.9664	1.05881	5	30.2332	1.2063	5	14.5846	1.33549	5	35.7842	33.27	3	2212.22	-2.3686	0
lEGFSVPR	8	1	1	W5PMT0	N-Term(iTRAQ8plex)	0.944352	8	33.5548	0.899095	8	32.2864	0.623618	8	47.2936	0.679784	8	47.7289	0.540358	8	60.6516	33.26	3	1208.69	-1.747	0
lVVLGSGGVGk	1	2	1	W5NSD5	N-Term(iTRAQ8plex); K11(iTRAQ8plex)	1.02888	1		0.995366	1		1.02795	1		0.939243	1		0.986556	1		33.24	3	1594.01	-1.09511	0
lcGAILGGPk	2	2	1	S5FR89	N-Term(iTRAQ8plex); C2(Carbamidomethyl); K10(iTRAQ8plex)	1.06185	2	70.8665	1.55975	2	28.0138	1.05868	2	10.3101	1.19793	2	29.2098	1.11597	2	21.3354	33.13	3	1593.97	2.89206	0
gSELVVAGk	1	1	1	W5NRG7	N-Term(iTRAQ8plex); K9(iTRAQ8plex)	1.68244	1		1.61708	1		1.56503	1		1.27397	1		1.28068	1		33.07	2	1467.9	-0.273902	0
eDTVGRPLPHLAAAMQASGEAVYcDDIPR	1	1	1	W5PMT0	N-Term(iTRAQ8plex); C24(Carbamidomethyl)	0.709072	1		0.943521	1		1.01848	1		0.922858	1		1.35975	1		33.07	4	3443.7	0.369599	0
iTPSYVAFTPEGER	1	1	1	W5PTR5	N-Term(iTRAQ8plex)	0.928651	1		0.816721	1		0.637123	1		0.594089	1		0.634923	1		33.04	2	1870.99	-0.0621487	0
qQLAPYSDDLR	6	1	1	W5NX51	N-Term(iTRAQ8plex)	1.22291	6	3.99536	1.17625	6	17.4072	1.376	6	22.0485	0.998215	6	36.5231	1.26442	6	6.5163	33.03	2	1609.85	-1.49097	0
lSPDAIPGNWASR	2	1	1	W5Q6U0	N-Term(iTRAQ8plex)	0.787073	2	15.6494	1.29746	2	13.0272	0.915271	2	11.2777	0.69645	2	1.98285	0.725742	2	14.7629	32.94	3	1687.91	-0.624062	0
tYDSYLGDDYVR	1	1	1	W5PF65	N-Term(iTRAQ8plex)	1.26234	1		1.45785	1		1.84465	1		1.15295	1		0.832066	1		32.93	2	1770.85	0.000667229	0
nFDDYMk	3	2	1	W5NU39	N-Term(iTRAQ8plex); K7(iTRAQ8plex)	1.52448	3	4.11738	2.35174	3	6.92896	3.12981	3	21.4464	2.99062	3	11.5851	3.10558	3	0.112592	32.92	2	1540.79	-4.88032	0
eGREQEGEEMAEYR	3	1	1	W5NPT7	N-Term(iTRAQ8plex)	0.86338	3	12.1988	1.0822	3	10.9	0.659298	3	39.2586	0.515937	3	59.3751	0.553708	3	59.5184	32.89	2	2016.92	-2.77999	1
vDYGFQVk	2	2	1	W5NUX8	N-Term(iTRAQ8plex); K8(iTRAQ8plex)	0.930162	2	1.4279	1.0945	2	4.50484	1.14918	2	6.64254	0.90432	2	7.97708	0.685706	2	10.1028	32.85	2	1563.89	-4.77152	0
dDSPDLPk	5	2	2	P14639;W5PWE9	N-Term(iTRAQ8plex); K8(iTRAQ8plex)																32.74	2	1494.81	-8.93198	0
lSSPAVITDEVIPAcLPSPNYVVADk	2	2	1	W5P3R3	N-Term(iTRAQ8plex); C15(Carbamidomethyl); K26(iTRAQ8plex)	0.817231	2	38.1532	0.98224	2	79.0703	1.06916	2	19.9088	0.968064	2	19.7506	1.03685	2	25.5012	32.72	3	3363.82	-2.94011	0
gWEEGVAQMSVGQR	1	1	1	W5QB61	N-Term(iTRAQ8plex)	2.12823	1		1.84849	1		0.994437	1		0.685541	1		0.70341	1		32.68	3	1837.91	-1.79167	0
aDQFANEWGR	7	4	2	W5PJR5;P42819	N-Term(iTRAQ8plex)																32.61	2	1497.73	-3.10659	0
lNNELLAk	4	3	2	I1WXR3;W5PZS7	N-Term(iTRAQ8plex); K8(iTRAQ8plex)																32.52	2	1522.94	-3.43977	0
gDVAFVk	2	2	2	W5PFC9;W5PF65	N-Term(iTRAQ8plex); K7(iTRAQ8plex)																32.49	2	1343.81	-0.509794	0
aYLEEEcPGTLQR	1	1	1	W5Q9A2	N-Term(iTRAQ8plex); C7(Carbamidomethyl)	1.24014	1		0.854289	1		0.812503	1		0.720648	1		0.708754	1		32.49	2	1869.93	-1.59081	0
qcTNEFSVQNR	2	1	1	W5PZD0	N-Term(iTRAQ8plex); C2(Carbamidomethyl)	1.31227	2	16.4227	1.36966	2	6.81121	1.38315	2	11.3445	2.90407	2	3.55014	2.96159	2	14.4607	32.32	2	1686.81	-2.72567	0
lESDVSTQmEYcR	2	2	1	W5NQ46	N-Term(iTRAQ8plex); M9(Oxidation); C12(Carbamidomethyl)	1.77985	2	4.89422	2.29667	2	25.2712	2.22673	2	9.69897	1.2315	2	1.72579	1.07453	2	7.92198	32.23	2	1937.89	-0.856505	0
fWWENPGVFTEk	2	2	1	Q9MZY2	N-Term(iTRAQ8plex); K12(iTRAQ8plex)	1.35262	2	24.7821	1.50101	2	4.48315	2.91497	2	19.1127	1.73726	2	10.7297	1.75379	2	16.2441	32.22	3	2148.14	-0.680041	0
mGGGFGGk	9	1	1	W5PMT0	N-Term(iTRAQ8plex); K8(iTRAQ8plex)	0.877956	9	7.59541	0.851636	9	30.1056	0.874937	9	37.8517	0.929935	9	53.9422	0.812883	9	30.1398	32.2	3	1318.74	-0.177955	0
aALTIDEk	4	5	2	I1WXR3;W5PZS7	N-Term(iTRAQ8plex); K8(iTRAQ8plex)																32.1	2	1468.88	-1.85353	0
amAAEAEASR	1	1	1	W5P601	N-Term(iTRAQ8plex); M2(Oxidation)	0.615913	1		0.679132	1		0.745722	1		0.582803	1		0.63089	1		31.99	2	1326.66	-1.87276	0
qLEQVIAINLLPSR	1	1	1	W5Q5H8	N-Term(iTRAQ8plex)	0.625235	1		0.757249	1		0.79912	1		0.530206	1		0.576954	1		31.99	2	1898.14	-0.299631	0
sAEcPGPAQk	2	1	1	W5QH54	N-Term(iTRAQ8plex); C4(Carbamidomethyl); K10(iTRAQ8plex)	0.631337	2	41.3732	0.642217	2	29.8514	1.12034	2	34.8978	1.15606	2	42.5687	1.05383	2	40.6594	31.91	2	1652.89	-0.10283	0
sSLLDILAAR	2	2	1	Q009B1	N-Term(iTRAQ8plex)	1.35147	2	0.292431	1.16411	2	0.679079	1.04177	2	12.2449	1.04248	2	17.4327	1.27707	2	9.88567	31.87	2	1362.82	-3.13357	0
eGMLSQGGVk	1	1	1	W5QH04	N-Term(iTRAQ8plex); K10(iTRAQ8plex)	1	1		0.681143	1		0.527341	1		0.441892	1		0.443878	1		31.77	2	1613.91	-1.75897	0
eEGSVSSGTk	1	1	1	W5Q5H8	N-Term(iTRAQ8plex); K10(iTRAQ8plex)	1.70703	1		2.39731	1		2.56487	1		1.40127	1		1.2467	1		31.76	2	1588.86	-4.56071	0
lDPTYTSATLLFQk	9	1	1	W5PMT0	N-Term(iTRAQ8plex); K14(iTRAQ8plex)	0.903848	9	10.3381	0.949039	9	14.344	1.00449	9	14.9315	1.10479	9	26.2121	0.971429	9	9.92971	31.68	3	2206.25	-2.93362	0
tLSDYNIQk	2	10	1	P0CG55	N-Term(iTRAQ8plex); K9(iTRAQ8plex)	0.699242	2	13.7472	0.592273	2	15.9635	0.582401	2	5.84548	0.612991	2	5.50525	0.522911	2	8.91073	31.62	2	1689.97	1.45711	0
vIAAEGEMNASR	1	1	1	W5P601	N-Term(iTRAQ8plex)	0.647481	1		0.625261	1		0.531458	1		0.644932	1		0.455558	1		31.6	2	1551.81	-0.519045	0
hQQTITIPAR	6	3	2	W5P5T4;W5NPK5	N-Term(iTRAQ8plex)																31.58	3	1468.85	-0.967904	0
hLVDEPQNLIk	23	2	2	P14639;W5PWE9	N-Term(iTRAQ8plex); K11(iTRAQ8plex)																31.51	3	1914.11	-7.86304	0
tQLLNVcMNAR	1	1	1	W5P256	N-Term(iTRAQ8plex); C7(Carbamidomethyl)	0.761582	1		0.518781	1		0.430915	1		0.26874	1		0.266485	1		31.32	2	1623.86	-2.26852	0
iIVTQTmk	119	1	1	P67975	N-Term(iTRAQ8plex); M7(Oxidation); K8(iTRAQ8plex)	1.04488	119	21.5824	0.980213	119	25.3607	1.24617	119	21.202	1.63957	119	18.7659	1.7787	119	20.0778	31.26	2	1557.94	-3.17129	0
gPGPDSLMATLYSR	1	1	1	Q9XSM0	N-Term(iTRAQ8plex)	1.16194	1		0.771841	1		0.463578	1		0.375384	1		0.462239	1		31.25	2	1768.91	-4.1357	0
mWVTGVVTQGASR	2	2	1	W5PNP1	N-Term(iTRAQ8plex); M1(Oxidation)	1.59391	2	6.64941	1.01615	2	26.5268	1.00597	2	3.85846	1.02052	2	26.1388	0.784909	2	29.1589	31.19	2	1711.91	-2.72156	0
eVTQVVk	2	1	1	W5Q695	N-Term(iTRAQ8plex); K7(iTRAQ8plex)	0.891781	2	21.1113	0.610306	2	56.406	0.503414	2	73.4566	0.774242	2	53.3142	0.739536	2	66.2122	31.03	2	1410.87	-7.20979	0
lSFVTVDSNLR	1	1	1	W5NSA6	N-Term(iTRAQ8plex)	1.59535	1		1.41782	1		1.18929	1		0.753056	1		0.642271	1		31.03	2	1554.87	-4.72416	0
dVIGcLNVk	2	1	1	W5NUH1	N-Term(iTRAQ8plex); C5(Carbamidomethyl); K9(iTRAQ8plex)	1.16271	2	91.4072	0.647331	2	52.6649	0.735135	2	26.0368	0.838962	2	37.7963	0.67791	2	2.45494	30.91	2	1625.95	0.433084	0
eQILAALEk	11	1	1	W5PAJ2	N-Term(iTRAQ8plex); K9(iTRAQ8plex)	1.05663	11	5.72193	0.968566	11	20.0545	1.17691	11	14.2511	1.15695	11	7.9611	1.34007	11	11.171	30.83	3	1622.99	-2.15206	0
gVVDSEDLPLNISR	2	3	1	W5PHW0	N-Term(iTRAQ8plex)	0.711416	1		0.65367	1		0.468102	1		0.254004	1		0.291006	1		30.82	2	1817.99	-1.99503	0
eYQTIADk	6	1	1	W5P7S6	N-Term(iTRAQ8plex); K8(iTRAQ8plex)	1.70212	6	23.3896	2.20815	6	6.92739	1.88409	6	21.9891	0.962107	6	11.267	0.898378	6	12.2205	30.79	2	1575.87	-6.74848	0
sQVDTQAQQLR	2	1	1	W5NWM2	N-Term(iTRAQ8plex)	1.43596	2	32.1555	1.4246	2	83.3347	1.27164	2	0.166313	1.00402	2	24.2276	0.965178	2	32.4281	30.74	3	1577.85	-1.71391	0
vLFQPGSTQVk	23	1	1	W5PMT0	N-Term(iTRAQ8plex); K11(iTRAQ8plex)	0.985403	23	17.709	0.836802	23	16.9903	0.821561	23	19.2113	0.885934	23	14.988	0.809119	23	15.1839	30.63	3	1812.09	0.834437	0
gILFVGSGVSGGEDGAR	1	2	1	P00349	N-Term(iTRAQ8plex)	1.04956	1		1.43325	1		1.31108	1		1.43964	1		1.50135	1		30.61	2	1881.99	-3.51921	0
vQPYLDEFQk	9	1	1	W5NX51	N-Term(iTRAQ8plex); K10(iTRAQ8plex)	1.23079	9	16.7107	1.34775	9	7.00636	1.82332	9	16.2449	1.47687	9	21.0645	1.59201	9	15.2476	30.6	3	1875.05	-1.18623	0
eTAEEVk	2	4	1	D3G9G3	N-Term(iTRAQ8plex); K7(iTRAQ8plex)	0.77721	2	3.44496	1.71291	2	4.27152	0.483531	2	46.7878	0.488616	2	11.6291	0.55957	2	26.2751	30.59	2	1413.79	-12.476	0
gSELQTQAk	2	1	1	W5PJ97	N-Term(iTRAQ8plex); K9(iTRAQ8plex)	0.844136	2	4.51465	0.546287	2	1.80805	0.771345	2	57.2229	0.559284	2	19.3474	0.796593	2	26.3309	30.59	2	1569.9	-4.33785	0
dcQDVANk	4	1	1	W5Q5A6	N-Term(iTRAQ8plex); C2(Carbamidomethyl); K8(iTRAQ8plex)	1.72904	4	3.18897	2.65505	4	30.416	2.8379	4	41.0974	1.44736	4	29.7407	1.3512	4	16.4562	30.56	2	1557.8	-6.51947	0
eLEGILLPSDR	1	1	1	W5P6E0	N-Term(iTRAQ8plex)	1.02237	1		1.0096	1		1.23605	1		1.45815	1		1.19825	1		30.48	2	1545.87	-5.49225	0
dYQELmNTk	1	1	1	W5Q611	N-Term(iTRAQ8plex); M6(Oxidation); K9(iTRAQ8plex)	1.28811	1		1.18868	1		1.12206	1		1.3402	1		2.35711	1		30.46	2	1765.92	-1.85499	0
qFQFIQVAGQLGDk	12	2	1	W5PNP1	N-Term(iTRAQ8plex); K14(iTRAQ8plex)	0.933434	12	18.6515	1.0147	12	21.4888	0.845278	12	13.0514	0.971289	12	14.2201	0.954704	12	21.5124	30.44	3	2187.24	-0.198506	0
dSADGFLk	3	1	1	W5PF65	N-Term(iTRAQ8plex); K8(iTRAQ8plex)	1.15591	3	13.6616	1.27223	3	1.59819	1.75785	3	7.17281	0.755676	3	9.80852	0.508259	3	16.3107	30.37	2	1460.81	-6.05704	0
eLEIDDSASESVLDQVk	1	1	1	W5P8F9	N-Term(iTRAQ8plex); K17(iTRAQ8plex)	1.00734	1		0.756417	1		0.967461	1		1.13371	1		0.903937	1		30.37	3	2485.31	-1.39937	0
vcNPIITk	1	1	1	W5NPN4	N-Term(iTRAQ8plex); C2(Carbamidomethyl); K8(iTRAQ8plex)	0.745866	1		0.538323	1		0.559077	1		0.492306	1		0.40693	1		30.17	2	1552.94	5.19077	0
qQLDYGIYVINQAGESMFNR	1	2	1	F5CC79	N-Term(iTRAQ8plex)	0.987295	1		1.02179	1		1.2386	1		1.50912	1		1.60532	1		30.16	3	2650.33	0.511671	0
kENINELSk	82	5	3	D2DRB7;G3LUQ4;P04653	N-Term(iTRAQ8plex); K1(iTRAQ8plex); K9(iTRAQ8plex)																30.1	3	1987.19	-4.97009	1
lYDQLLQSYQQk	10	2	1	W5PZI1	N-Term(iTRAQ8plex); K12(iTRAQ8plex)	1.14933	10	14.7531	2.01807	10	16.6674	0.950442	10	17.3038	1.11396	10	13.4333	1.12494	10	14.8933	30.05	3	2135.19	-2.87234	0
eVWEELDGLDPNR	2	1	1	W5PS94	N-Term(iTRAQ8plex)	0.998014	2	7.88824	0.740292	2	1.13311	0.856087	2	51.9467	0.87765	2	84.3768	0.873606	2	82.5495	29.95	3	1875.94	0.514565	0
mTITDQVNcPESM	1	1	1	W5QGP4	N-Term(iTRAQ8plex); C9(Carbamidomethyl)	1.07714	1		1.11266	1		1.21708	1		0.868335	1		0.967043	1		29.92	2	1829.85	3.65995	0
mQPTGEPGk	1	1	1	W5P559	N-Term(iTRAQ8plex); K9(iTRAQ8plex)	1.40635	1		1.30895	1		1.29342	1		3.28168	1		1.62486	1		29.89	3	1552.87	2.86344	0
lVGPEEALTPGEAR	1	1	1	W5Q0C0	N-Term(iTRAQ8plex)	0.849291	1		0.600222	1		0.74886	1		0.698724	1		0.720532	1		29.88	2	1742.95	-5.77131	0
sAPSVTLFPPSk	8	1	1	W5PSQ7	N-Term(iTRAQ8plex); K12(iTRAQ8plex)	0.751083	8	5.78016	0.630709	8	22.5673	0.769916	8	25.303	0.889683	8	20.5789	1.07899	8	18.3369	29.79	3	1839.08	-1.48746	0
vLGPFcGEk	3	2	1	W5QH23	N-Term(iTRAQ8plex); C6(Carbamidomethyl); K9(iTRAQ8plex)	0.981871	3	9.76013	0.983211	3	5.34879	1.45333	3	0.795432	1.27197	3	5.3276	1.64163	3	0.0845693	29.76	2	1614.9	-7.12256	0
sSSEESAEVAPEEVk	3	6	4	E7BQS5;P04654;E7BQS3;E7BQS2	N-Term(iTRAQ8plex); K15(iTRAQ8plex)																29.76	3	2186.12	-2.4794	0
yIQkEDVPSER	102	5	3	D2DRB7;G3LUQ4;P04653	N-Term(iTRAQ8plex); K4(iTRAQ8plex)																29.7	2	1972.09	-3.83593	1
mYTSNYELk	10	1	1	W5PMH6	N-Term(iTRAQ8plex); K9(iTRAQ8plex)	1.74896	10	33.1349	1.48069	10	26.3637	2.42646	10	48.8172	3.48651	10	54.6567	2.6732	10	54.4103	29.69	2	1756.94	-1.94103	0
yGAEPATPVDPTTAIHLR	5	1	1	W5Q6U0	N-Term(iTRAQ8plex)	1.00518	5	80.2932	0.765099	5	43.4529	0.623193	5	43.3105	0.570914	5	63.4475	1.04524	5	50.2623	29.65	3	2213.19	1.885	0
iPEVQVYSR	8	5	1	A4ZVY8	N-Term(iTRAQ8plex)	1.00782	8	18.632	0.932446	8	14.9144	0.98289	8	9.18209	0.975557	8	19.7424	1.03842	8	18.2616	29.62	3	1394.79	-3.21812	0
iSLPFVNSSVSSLTVPSSNIR	3	1	1	W5P8F9	N-Term(iTRAQ8plex)	0.917468	3	6.37004	0.91668	3	6.43821	1.35243	3	22.5215	1.28915	3	10.3048	1.06997	3	2.05371	29.58	3	2508.39	-1.41733	0
nFEEVAFDEk	1	1	1	W5Q9H2	N-Term(iTRAQ8plex); K10(iTRAQ8plex)	1.15208	1		1.27302	1		0.902581	1		1.1949	1		1.08462	1		29.55	3	1835.96	-1.52659	0
vLPVPQk	371	3	2	P11839;R4R2H5	N-Term(iTRAQ8plex); K7(iTRAQ8plex)																29.52	2	1388.9	-4.00287	0
sVVSGSINTVLGSR	8	1	1	A6ZE99	N-Term(iTRAQ8plex)	1.08749	8	9.45456	1.06599	8	3.80717	0.951868	8	13.2179	1.1746	8	25.4803	1.20841	8	15.5449	29.49	2	1679.96	-0.649866	0
qEPGENSEILATLk	2	1	1	W5PDJ6	N-Term(iTRAQ8plex); K14(iTRAQ8plex)	1.00082	2	22.6236	1.02271	2	11.6652	0.901799	2	13.0193	0.974276	2	9.24799	0.950201	2	17.2586	29.49	3	2137.19	-1.1621	0
sELLVDQYLPLTk	1	1	1	A6ZE99	N-Term(iTRAQ8plex); K13(iTRAQ8plex)	1.12492	1		0.938362	1		1.17811	1		1.51105	1		1.35435	1		29.36	3	2127.24	-5.10294	0
vSFEGcTGLPR	1	1	1	W5NZU3	N-Term(iTRAQ8plex); C6(Carbamidomethyl)	0.906798	1		0.722334	1		0.778827	1		0.839861	1		1.1131	1		29.36	2	1526.79	-4.34	0
gVSTYLIPPTPLELYVNk	1	1	1	W5PGT9	N-Term(iTRAQ8plex); K18(iTRAQ8plex)	0.360854	1		0.384509	1		0.515489	1		0.54843	1		0.238639	1		29.34	3	2612.51	-0.617752	0
sLEDQVEVLR	1	1	1	W5QAL0	N-Term(iTRAQ8plex)	0.312038	1		0.387686	1		0.233462	1		0.251204	1		0.24052	1		29.28	2	1491.84	2.30288	0
aLNYEAk	1	1	1	W5PD71	N-Term(iTRAQ8plex); K7(iTRAQ8plex)	1.15856	1		0.913888	1		0.980619	1		1.05631	1		1.0202	1		29.23	2	1416.82	-5.56865	0
qGVQVLVSTR	1	1	1	W5Q6U0	N-Term(iTRAQ8plex)	1.04914	1		1.81293	1		0.949714	1		0.694362	1		0.659987	1		29.21	2	1390.83	-0.9025	0
aDIALLk	4	3	1	W5P3R3	N-Term(iTRAQ8plex); K7(iTRAQ8plex)	0.902009	2	1.20844	1.02787	2	17.879	1.366	2	25.6777	0.921903	2	24.5913	1.0092	2	25.9272	29.2	2	1351.88	0.14165	0
aFLDccEYIAR	3	2	2	W5NXP6;W5NRH2	N-Term(iTRAQ8plex); C5(Carbamidomethyl); C6(Carbamidomethyl)																29.15	2	1721.82	-2.63945	0
aGFAGDDAPR	4	7	1	P60713	N-Term(iTRAQ8plex)	0.505577	4	9.80581	0.895719	4	9.91041	0.674373	4	7.85797	0.855783	4	13.3241	0.485429	4	40.3109	29.12	2	1280.65	-1.22132	0
gAAPPPPLQNSSELR	1	2	1	F5CC79	N-Term(iTRAQ8plex)	1.41411	1		1.13857	1		1.45973	1		1.85253	1		2.14384	1		28.99	2	1838.01	0.836466	0
iLWESASLLR	4	3	3	W5P5T4;W5NPK5;O46544	N-Term(iTRAQ8plex)																28.95	2	1491.88	-2.11849	0
gSFLLGSPAAALSTLPVGAk	1	1	1	Q6IEB0	N-Term(iTRAQ8plex); K20(iTRAQ8plex)	1.38497	1		1.59282	1		2.73642	1		3.23281	1		2.23081	1		28.82	3	2465.46	0.835267	0
lPLSLLk	79	1	1	W5PSM5	N-Term(iTRAQ8plex); K7(iTRAQ8plex)	1.02953	79	11.2732	1.06516	79	14.9979	1.76779	79	15.0082	2.85576	79	11.2248	2.97719	79	13.2334	28.81	2	1391.94	-3.58385	0
tSQGLETQQR	4	1	1	W5NRI1	N-Term(iTRAQ8plex)	0.951735	4	21.2313	1.00253	4	6.23314	0.938259	4	9.78464	0.931771	4	8.84475	0.878584	4	6.56491	28.8	2	1451.77	-2.12345	0
iFPGNMDNNSHk	2	1	1	W5PNP1	N-Term(iTRAQ8plex); K12(iTRAQ8plex)	1.08787	2	1.44716	0.967318	2	3.72783	0.874289	2	13.9017	1.28906	2	1.17682	1.13941	2	6.09961	28.76	3	1982.03	-5.29289	0
tNLPSNTAFR	13	2	1	W5PMT0	N-Term(iTRAQ8plex)	0.969772	13	7.82729	0.918819	13	9.11261	0.727057	13	14.6956	0.790984	13	10.0723	0.707115	13	14.9433	28.75	2	1424.78	-0.254556	0
eAcSVPVcGQDR	1	1	1	C8BKD1	N-Term(iTRAQ8plex); C3(Carbamidomethyl); C8(Carbamidomethyl)	0.730588	1		0.46271	1		0.591131	1		0.372696	1		0.486527	1		28.71	2	1681.79	-1.66727	0
iVTDLTk	67	2	2	P14639;W5PWE9	N-Term(iTRAQ8plex); K7(iTRAQ8plex)																28.67	2	1397.88	-2.20422	0
aMAAEAEASR	1	1	1	W5P601	N-Term(iTRAQ8plex)	0.524382	1		0.452392	1		0.603933	1		0.523934	1		0.609921	1		28.66	2	1310.66	-4.84398	0
tVDVPck	6	1	1	W5PGE9	N-Term(iTRAQ8plex); C6(Carbamidomethyl); K7(iTRAQ8plex)	0.521274	6	11.3706	0.457896	6	9.53313	0.519021	6	9.25948	0.632473	6	19.2705	0.754939	6	17.0734	28.66	2	1426.82	0.0727101	0
aTDEQLk	11	2	2	P14639;W5PWE9	N-Term(iTRAQ8plex); K7(iTRAQ8plex)																28.64	2	1412.81	-6.25575	0
gNYDAAQR	6	6	3	W5PJR5;W5PJG0;P42819	N-Term(iTRAQ8plex)																28.62	2	1198.61	-5.15005	0
lELLLQk	11	2	1	W5PWT5	N-Term(iTRAQ8plex); K7(iTRAQ8plex)	0.796832	11	28.3726	0.667232	11	20.5849	1.14079	11	19.2789	1.10079	11	10.0084	1.201	11	8.74957	28.52	2	1464.96	-3.58729	0
sVQLMEk	5	1	1	W5NRH2	N-Term(iTRAQ8plex); K7(iTRAQ8plex)	0.952583	5	20.678	1.13328	5	5.8599	1.34353	5	8.43475	1.36811	5	22.2607	1.42701	5	11.664	28.5	2	1442.85	-3.01265	0
qTQEALIk	1	1	1	W5NRG7	N-Term(iTRAQ8plex); K8(iTRAQ8plex)	1.80504	1		1.68867	1		1.2183	1		1.11493	1		0.822656	1		28.48	2	1538.93	-1.20702	0
vVEESELAR	3	1	1	W5PID9	N-Term(iTRAQ8plex)	1.90531	3	3.28723	1.32631	3	5.51164	1.58067	3	4.70776	1.86819	3	4.00296	1.5955	3	18.2604	28.47	2	1335.74	-1.69609	0
gLcIIPTk	11	1	1	W5PMT0	N-Term(iTRAQ8plex); C3(Carbamidomethyl); K8(iTRAQ8plex)	0.809885	11	7.05298	1.02325	11	57.0945	0.783567	11	13.5428	0.93372	11	8.15554	0.821355	11	19.6761	28.46	3	1509.93	-1.7567	0
tLLEGEESR	1	1	1	W5Q611	N-Term(iTRAQ8plex)	1.35154	1		1.02463	1		1.41116	1		1.51391	1		2.03172	1		28.45	2	1337.72	-3.25382	0
sAAENEALTQLATAQNk	1	3	1	Q9XSQ2	N-Term(iTRAQ8plex); K17(iTRAQ8plex)	1.22256	1		1.05065	1		1.4285	1		1.43754	1		1.45582	1		28.32	3	2368.29	-1.70114	0
nGQPESEDkYGTTTSQLDADGSYFLYSR	1	1	1	W5PH95	N-Term(iTRAQ8plex); K9(iTRAQ8plex)	0.186257	1		0.131453	1		0.185844	1		0.146388	1		0.166	1		28.3	3	3737.81	1.12597	1
aDIGcTPGSGR	5	1	1	W5NRI1	N-Term(iTRAQ8plex); C5(Carbamidomethyl)	0.660162	5	4.68506	0.844534	5	14.7096	2.31909	5	17.2451	1.16146	5	30.9067	1.19492	5	7.04996	28.29	2	1394.7	-1.40507	0
tSEATELVk	2	1	1	W5Q5A6	N-Term(iTRAQ8plex); K9(iTRAQ8plex)	1.91951	2	13.1919	2.55002	2	7.20803	2.45692	2	6.1302	1.32014	2	1.13575	1.17716	2	4.20756	28.17	3	1585.92	-3.71856	0
eLTEFAk	56	3	2	P14639;W5PWE9	N-Term(iTRAQ8plex); K7(iTRAQ8plex)																28.08	2	1445.84	-3.311	0
dYVAQFEASALGk	3	1	1	W5NX51	N-Term(iTRAQ8plex); K13(iTRAQ8plex)	0.939749	3	8.58062	1.11309	3	23.8528	1.26903	3	13.0287	1.18975	3	23.7494	1.05215	3	17.7168	28.08	3	2007.09	-6.51225	0
vATPMNAEENR	1	3	1	B0BL71	N-Term(iTRAQ8plex)	0.871832	1		1.0026	1		0.631772	1		0.496052	1		0.387807	1		28.04	2	1535.78	1.02481	0
lVAALYk	7	1	1	Q29524	N-Term(iTRAQ8plex); K7(iTRAQ8plex)	1.41915	7	47.165	1.3101	7	42.3956	1.55648	7	36.0104	2.4756	7	37.3858	2.33877	7	46.6151	27.88	2	1385.89	-3.09775	0
ccTESLVNR	12	2	2	P14639;W5PWE9	N-Term(iTRAQ8plex); C1(Carbamidomethyl); C2(Carbamidomethyl)																27.86	3	1442.71	1.32083	0
lTVLGQPk	124	1	1	W5PSQ7	N-Term(iTRAQ8plex); K8(iTRAQ8plex)	0.31307	124	46.695	0.245553	124	62.8366	0.303249	124	50.4278	0.282172	124	67.2551	0.311039	124	58.8779	27.8	2	1463.94	-3.3299	0
lVGQDVAk	4	1	1	Q29524	N-Term(iTRAQ8plex); K8(iTRAQ8plex)	1.63849	4	15.3825	1.08278	4	31.4175	1.69337	4	42.5178	2.35094	4	36.777	1.98277	4	44.474	27.76	2	1437.89	-0.144682	0
dVTLYEk	2	1	1	W5P3R3	N-Term(iTRAQ8plex); K7(iTRAQ8plex)	0.908358	2	19.6573	0.910369	2	3.09951	1.10803	2	2.37683	0.803704	2	19.8572	0.762596	2	39.1004	27.64	2	1475.86	-0.797518	0
gVFVLNk	9	1	1	W5NRI1	N-Term(iTRAQ8plex); K7(iTRAQ8plex)	1.02917	9	8.22034	1.11708	9	8.75253	1.26314	9	6.57257	1.37259	9	12.7913	1.45963	9	10.2666	27.57	2	1384.88	0.0762773	0
vPcFQAGDSR	5	2	1	Q9MZY2	N-Term(iTRAQ8plex); C3(Carbamidomethyl)	1.51934	5	15.8196	1.47312	5	32.3489	2.16507	5	10.6049	1.46908	5	33.4705	1.46173	5	23.782	27.55	2	1440.72	0.603806	0
wENGEcAQk	4	3	1	P67975	N-Term(iTRAQ8plex); C6(Carbamidomethyl); K9(iTRAQ8plex)	1.39267	4	52.3726	1.23061	4	22.4879	1.36785	4	47.1691	3.12957	4	51.6851	2.57405	4	66.949	27.5	3	1729.87	-3.69719	0
lPILNQPTNQVVANAk	2	1	1	A6ZE99	N-Term(iTRAQ8plex); K16(iTRAQ8plex)	1.02096	2	12.6603	0.921067	2	4.84622	0.85297	2	0.524617	0.913343	2	0.490312	1.00752	2	8.37843	27.43	4	2328.38	-1.19907	0
aPDFVFYAPR	1	5	2	W5PUV9;W5P2V0	N-Term(iTRAQ8plex)																27.41	2	1486.8	-1.82184	0
sLPTALVk	19	1	1	W5QHZ5	N-Term(iTRAQ8plex); K8(iTRAQ8plex)	0.204579	19	26.7253	0.178839	19	37.6668	0.181283	19	21.8173	0.238818	19	16.5535	0.167263	19	37.7048	27.37	2	1436.93	0.540194	0
dQHPYLk	1	1	1	A6ZE99	N-Term(iTRAQ8plex); K7(iTRAQ8plex)	0.607312	1		0.54517	1		0.529591	1		0.5045	1		0.498715	1		27.37	2	1508.87	-0.35125	0
dIGPQLPEcEEDVScPEAPk	1	1	1	W5P0Q4	N-Term(iTRAQ8plex); C9(Carbamidomethyl); C15(Carbamidomethyl); K20(iTRAQ8plex)	2.05399	1		2.51364	1		2.11199	1		1.01066	1		0.70392	1		27.35	3	2878.41	0.211933	0
vDGALcTEk	2	1	1	W5QAB1	N-Term(iTRAQ8plex); C6(Carbamidomethyl); K9(iTRAQ8plex)	0.976577	2	3.12637	1.4983	2	22.9694	1.44954	2	28.0715	0.607285	2	22.2956	0.443211	2	31.933	27.3	2	1600.88	0.151622	0
eAAEVLTADMDAER	1	2	1	W5P5I0	N-Term(iTRAQ8plex)	0.893823	1		0.8498	1		0.826475	1		0.799429	1		0.844969	1		27.25	2	1824.9	0.611834	0
gYLTPNYEVk	5	1	1	W5PLB7	N-Term(iTRAQ8plex); K10(iTRAQ8plex)	0.489748	5	41.2879	0.418776	5	46.3523	0.372145	5	50.8147	0.364667	5	70.9826	0.363814	5	28.368	27.23	3	1792.01	-0.786913	0
dGALELAR	2	1	1	W5NXP6	N-Term(iTRAQ8plex)	2.39506	2	0.255576	2.60339	2	10.1891	1.49893	2	19.49	1.53757	2	5.36682	1.51699	2	2.82124	27.17	2	1148.66	-1.45199	0
sQIHDIVLVGGSTR	1	1	1	W5NPN4	N-Term(iTRAQ8plex)	0.88193	1		0.648818	1		0.588357	1		0.692676	1		0.618899	1		27.04	3	1786.01	0.235872	0
vDEVGAEALGR	1	9	1	P02075	N-Term(iTRAQ8plex)	1.67522	1		0.401	1		0.433853	1		0.609314	1		0.794513	1		26.94	2	1419.77	-3.33738	0
lVIVGDGAcGk	1	3	1	C5IJ99	N-Term(iTRAQ8plex); C9(Carbamidomethyl); K11(iTRAQ8plex)	0.785403	1		2.07078	1		1.08629	1		1.15064	1		1.08342	1		26.89	2	1696.98	-3.48162	0
tLVEGLk	6	2	1	W5PFL8	N-Term(iTRAQ8plex); K7(iTRAQ8plex)	0.728887	6	12.3126	0.716588	6	7.07884	0.748352	6	18.993	0.783792	6	20.3924	0.998563	6	40.832	26.85	2	1367.87	-4.52758	0
tAEHFQEAVAESR	1	2	1	W5P7W0	N-Term(iTRAQ8plex)	1.65611	1		1.57715	1		1.14971	1		1.30877	1		1.1049	1		26.84	3	1778.89	-1.69596	0
eLIDQYDVQR	1	8	1	H9A6H7	N-Term(iTRAQ8plex)	1.03372	1		0.366091	1		0.213266	1		0.168325	1		0.164833	1		26.8	2	1582.84	1.05117	0
gLcAIAQAESLR	1	1	1	W5PPH6	N-Term(iTRAQ8plex); C3(Carbamidomethyl)	0.661938	1		0.934541	1		0.513046	1		0.3491	1		0.435769	1		26.72	2	1592.87	-2.91765	0
gLQAVLk	11	2	1	Q9MZY2	N-Term(iTRAQ8plex); K7(iTRAQ8plex)	1.84964	11	8.34591	2.03254	11	14.4385	3.81064	11	26.9238	2.40992	11	18.2829	2.57938	11	26.4414	26.68	2	1336.87	-1.74719	0
tVDQHQk	46	6	4	E7BQS5;P04654;E7BQS3;E7BQS2	N-Term(iTRAQ8plex); K7(iTRAQ8plex)																26.68	2	1463.83	-5.88819	0
iLNVPLck	8	1	1	W5P256	N-Term(iTRAQ8plex); C7(Carbamidomethyl); K8(iTRAQ8plex)	0.812885	8	7.46019	0.89665	8	10.0175	0.652203	8	5.46911	0.697057	8	16.6461	0.616471	8	6.30109	26.64	3	1564.97	0.492848	0
lINEYVk	6	1	1	W5PHP7	N-Term(iTRAQ8plex); K7(iTRAQ8plex)	1.10355	6	15.4479	1.06684	6	3.23973	1.25758	6	8.92201	1.11055	6	24.2871	1.15082	6	23.4585	26.62	2	1486.9	-3.91251	0
qDGQFSVLFTk	4	2	1	P29701	N-Term(iTRAQ8plex); K11(iTRAQ8plex)	1.24726	4	16.7238	1.25267	4	9.78892	1.6496	4	1.53258	1.57227	4	5.03423	1.49781	4	7.86453	26.59	3	1878.05	-3.28864	0
mLTAEEk	2	8	1	P02075	N-Term(iTRAQ8plex); K7(iTRAQ8plex)	1.44488	2	6.90432	0.434325	2	15.154	0.347468	2	119.983	0.451689	2	99.0155	0.666804	2	111.713	26.47	2	1429.82	-1.32296	0
eASVQEIPVSR	2	2	1	W5P3R3	N-Term(iTRAQ8plex)	0.914213	2	33.2328	1.2011	2	14.4602	1.10872	2	17.0984	0.646943	2	22.9627	0.771282	2	13.1534	26.43	2	1518.84	-1.37828	0
hQPQEFPTYVEPTNDEIcEAFR	2	2	1	W5PTG9	N-Term(iTRAQ8plex); C18(Carbamidomethyl)	1.18477	2	7.38608	0.876775	2	15.8787	1.21573	2	20.6613	0.883306	2	6.53906	0.701245	2	53.0303	26.38	3	3011.4	-4.43779	0
lkPEPDTLcAEFk	26	2	2	P14639;W5PWE9	N-Term(iTRAQ8plex); K2(iTRAQ8plex); C9(Carbamidomethyl); K13(iTRAQ8plex)																26.36	3	2460.4	1.37395	0
lcMAALk	4	2	1	W5PTG9	N-Term(iTRAQ8plex); C2(Carbamidomethyl); K7(iTRAQ8plex)	0.434798	4	126.668	0.462864	4	101.452	0.647929	4	109.291	0.544599	4	79.1574	0.668013	4	107.229	26.2	2	1414.84	-1.45371	0
dYQELMNTk	3	1	1	W5Q611	N-Term(iTRAQ8plex); K9(iTRAQ8plex)	1.35351	3	1.15612	0.81349	3	3.98042	1.55628	3	28.9438	1.70465	3	7.46836	2.14047	3	9.65295	26.2	3	1749.93	-0.320995	0
mLFNQQELFGR	2	1	1	W5PFC9	N-Term(iTRAQ8plex)	1.04721	2	19.9772	0.891077	2	0.742464	1.14694	2	9.44331	1.16887	2	1.17946	1.15378	2	7.85335	26.19	2	1686.89	-1.00883	0
gYSFTTTAER	1	8	1	P60713	N-Term(iTRAQ8plex)	0.697346	1		1.15225	1		0.630267	1		0.430408	1		0.65658	1		26.11	2	1436.73	-2.78565	0
aSDDGEYR	11	1	1	W5NPT7	N-Term(iTRAQ8plex)	0.938813	11	14.1982	0.862209	11	15.1437	1.13208	11	40.3015	0.969647	11	15.0857	1.13071	11	25.8749	26.06	2	1216.57	-2.61431	0
eAQGGATk	3	1	1	W5PCT4	N-Term(iTRAQ8plex); K8(iTRAQ8plex)	1.13109	3	2.47008	1.05046	3	7.97476	1.06211	3	2.12339	1.257	3	0.496174	0.556536	3	6.51107	26.04	2	1369.79	-2.83195	0
sVEDcAAk	1	1	1	W5P3R3	N-Term(iTRAQ8plex); C5(Carbamidomethyl); K8(iTRAQ8plex)	0.88541	1		1.0906	1		1.5503	1		1.14525	1		1.12318	1		25.94	2	1487.8	-1.5023	0
gEEFPSmSESR	4	1	1	W5NPT7	N-Term(iTRAQ8plex); M7(Oxidation)	1.57789	4	35.591	1.24964	4	19.42	1.30955	4	30.6535	1.77448	4	21.0373	1.64061	4	32.3842	25.87	2	1575.72	-1.49883	0
nEcFLNHk	2	2	2	P14639;W5PWE9	N-Term(iTRAQ8plex); C3(Carbamidomethyl); K8(iTRAQ8plex)																25.75	2	1669.89	-1.94661	0
lQAANAEDIk	2	1	1	W5PS94	N-Term(iTRAQ8plex); K10(iTRAQ8plex)	0.762855	2	13.0771	1.04231	2	12.5105	1.08338	2	5.30062	1.10837	2	8.34102	0.887236	2	5.90827	25.74	3	1680.98	0.764228	0
vLQSDLVMNVYR	1	1	1	W5Q6U0	N-Term(iTRAQ8plex)	0.725653	1		1.25863	1		0.945373	1		0.787881	1		0.680048	1		25.72	2	1740.96	-3.33549	0
lDSPATPEk	5	2	1	W5PMT0	N-Term(iTRAQ8plex); K9(iTRAQ8plex)	0.762548	5	3.77055	0.688771	5	21.0695	0.854041	5	9.14383	0.810896	5	18.0105	0.797479	5	44.4189	25.54	2	1565.89	-8.69121	0
eDEFFSAFk	19	1	1	W5PMT0	N-Term(iTRAQ8plex); K9(iTRAQ8plex)	1.03388	19	20.5217	0.76848	19	11.6424	0.742302	19	8.69614	0.840252	19	10.447	0.79512	19	5.23266	25.54	3	1727.91	-0.967017	0
nPDVNPEALEAFk	2	1	1	W5NV32	N-Term(iTRAQ8plex); K13(iTRAQ8plex)	1.22279	2	13.8092	0.864274	2	20.1272	0.997731	2	19.9405	1.57813	2	11.8562	1.29472	2	6.86083	25.44	3	2052.12	0.116648	0
vFTPEELEAEIGR	1	1	1	W5Q411	N-Term(iTRAQ8plex)	0.942645	1		0.564132	1		0.68434	1		0.837277	1		0.912744	1		25.4	2	1793.95	-2.15151	0
aLPmHIQLAFNPTQLEGQcHV	3	1	1	Q9XSC0	N-Term(iTRAQ8plex); M4(Oxidation); C19(Carbamidomethyl)	1.09919	3	18.2986	1.38103	3	38.274	1.24634	3	19.5625	3.15617	3	0.167452	1.67651	3	8.73271	25.37	3	2724.39	0.517004	0
vLSLSQPk	3	1	1	R4R2H5	N-Term(iTRAQ8plex); K8(iTRAQ8plex)	1.01385	3	15.9464	1.13385	3	0.622145	1.33741	3	2.62005	1.56765	3	2.65345	2.29825	3	19.747	25.35	2	1479.93	-4.96856	0
vQAELDETk	1	1	1	W5Q2V0	N-Term(iTRAQ8plex); K9(iTRAQ8plex)	0.98547	1		0.819819	1		0.853489	1		0.913056	1		0.968023	1		25.35	2	1640.93	-0.362903	0
gEAGEMELFASTQNPMk	1	1	1	W5PMT0	N-Term(iTRAQ8plex); K17(iTRAQ8plex)	0.908163	1		1.07409	1		0.838931	1		0.947539	1		0.918354	1		25.2	3	2448.24	0.0767376	0
aGYTLVk	2	1	1	W5QAB1	N-Term(iTRAQ8plex); K7(iTRAQ8plex)	1.28116	2	5.95632	1.49369	2	3.9285	2.03084	2	6.63136	0.787705	2	17.1321	0.697986	2	8.83289	25.19	2	1359.84	-5.1938	0
tQVEDAFR	1	2	1	C7DLN1	N-Term(iTRAQ8plex)	0.72111	1		1.62389	1		1.03079	1		0.723649	1		0.69655	1		25.18	2	1269.67	-2.95795	0
qFLSSSTTISR	1	1	1	W5Q5H8	N-Term(iTRAQ8plex)	0.855459	1		0.946105	1		0.771281	1		0.467219	1		0.365911	1		25.08	2	1530.84	-4.30483	0
vGLHEVEVk	1	3	2	W5P5T4;W5NPK5	N-Term(iTRAQ8plex); K9(iTRAQ8plex)																25.04	3	1617.97	-4.27113	0
eFLDVIk	2	1	1	W5P7S6	N-Term(iTRAQ8plex); K7(iTRAQ8plex)	1.56087	2	19.7937	1.55653	2	41.1708	1.57367	2	27.5474	0.893796	2	3.41202	0.794267	2	5.90216	24.95	2	1471.89	-3.19531	0
kISQYYQk	31	6	4	E7BQS5;P04654;E7BQS3;E7BQS2	N-Term(iTRAQ8plex); K1(iTRAQ8plex); K8(iTRAQ8plex)																24.95	3	1970.18	-3.94015	1
aDALVGk	1	1	1	W5NRI1	N-Term(iTRAQ8plex); K7(iTRAQ8plex)	0.962845	1		0.905376	1		0.921697	1		1.10434	1		1.18047	1		24.91	2	1281.8	0.0564468	0
dLIVPNDVYR	1	2	1	W5PQH0	N-Term(iTRAQ8plex)	0.674142	1		0.432994	1		0.367801	1		0.358393	1		0.524321	1		24.89	2	1507.84	-0.573739	0
tALSSEAPTTR	3	2	1	Q9MZY2	N-Term(iTRAQ8plex)	1.78032	3	31.1602	2.2775	3	23.0444	2.21636	3	67.1647	1.40829	3	30.7282	1.54815	3	16.128	24.88	2	1437.78	-3.32475	0
lRPLVEQSQSR	1	2	1	Q7M2U8	N-Term(iTRAQ8plex)	0.679831	1		1.35043	1		0.304979	1		0.268931	1		0.298192	1		24.86	3	1616.94	-1.10677	0
aSDADLNWNNLk	6	1	1	W5PF65	N-Term(iTRAQ8plex); K12(iTRAQ8plex)	1.23795	6	5.94162	1.33186	6	4.37149	1.69	6	16.1902	1.37627	6	5.17214	1.3616	6	10.2022	24.84	3	1969.06	-1.757	0
gcDVVVIPAGVPR	1	1	1	W5PW05	N-Term(iTRAQ8plex); C2(Carbamidomethyl)	1.50859	1		1.06334	1		0.65559	1		0.363613	1		0.40425	1		24.83	2	1642.92	-5.60715	0
tGTVLLEVR	1	1	1	W5Q6U0	N-Term(iTRAQ8plex)	0.659491	1		2.02769	1		1.35946	1		0.710087	1		0.764014	1		24.76	2	1291.78	-3.39216	0
gGVASGFk	1	2	1	F2YQ13	N-Term(iTRAQ8plex); K8(iTRAQ8plex)	1.03835	1		0.985571	1		1.37396	1		1.57704	1		1.81257	1		24.73	2	1330.79	-4.5401	0
lGMLSSEGTck	2	1	1	W5Q6U0	N-Term(iTRAQ8plex); C10(Carbamidomethyl); K11(iTRAQ8plex)	0.96994	2	50.37	1.56185	2	38.2543	0.908643	2	11.1619	0.867482	2	17.5358	0.762154	2	4.0594	24.61	2	1790.96	-1.34905	0
kEEQDQFk	2	1	1	W5PMH6	N-Term(iTRAQ8plex); K1(iTRAQ8plex); K8(iTRAQ8plex)	1.55701	2	1.43138	1.12812	2	11.1332	2.22742	2	5.38951	3.14239	2	0.990149	2.93691	2	1.06937	24.6	2	1964.12	-1.47209	1
fYYVDDPDGLk	8	1	1	W5NRI1	N-Term(iTRAQ8plex); K11(iTRAQ8plex)	0.914665	8	17.6518	1.10031	8	10.1333	1.22338	8	6.69437	1.23587	8	8.79526	1.19682	8	4.14001	24.58	3	1940.02	-2.52415	0
iEENVEELR	2	1	1	W5NWM2	N-Term(iTRAQ8plex)	0.878656	2	8.54549	0.944147	2	23.4683	1.21383	2	15.6259	1.00162	2	17.0885	0.872075	2	9.79299	24.48	2	1434.77	-4.76016	0
tLIYNVNk	5	3	1	W5PSP9	N-Term(iTRAQ8plex); K8(iTRAQ8plex)	0.286337	5	18.9479	0.310249	5	49.0123	0.487052	5	15.5115	0.289202	5	32.6908	0.367899	5	13.1397	24.46	3	1572.96	-0.0438684	0
lSQETEALGR	2	1	1	W5PS94	N-Term(iTRAQ8plex)	0.817964	2	24.0742	0.624262	2	28.109	0.737407	2	33.4728	0.884445	2	40.4005	1.10677	2	6.94481	24.32	2	1407.77	-1.44396	0
dVEELSk	1	1	1	W5QAB1	N-Term(iTRAQ8plex); K7(iTRAQ8plex)	1.72139	1		1.09395	1		1.59055	1		1.10526	1		1.16404	1		24.32	2	1427.81	-6.21539	0
fWTFPEVLR	3	1	1	W5NXW9	N-Term(iTRAQ8plex)	0.600911	3	33.4442	1.2289	3	98.7577	0.623053	3	40.9525	0.462525	3	58.2051	0.255238	3	3.69192	24.22	3	1498.84	-0.277454	0
sGSDEVQVk	4	1	1	W5P5T4	N-Term(iTRAQ8plex); K9(iTRAQ8plex)	0.729904	4	7.7698	0.941226	4	13.1761	1.02879	4	10.7605	1.05157	4	11.1209	1.04943	4	11.7863	24.21	2	1556.87	-2.79715	0
aEDVVLEHR	1	1	1	W5P3T2	N-Term(iTRAQ8plex)	1.24689	1		1.30926	1		1.16322	1		1.44748	1		1.76077	1		24.11	3	1371.75	-0.704397	0
tkIPAVFk	32	3	1	P67975	N-Term(iTRAQ8plex); K2(iTRAQ8plex); K8(iTRAQ8plex)	0.504094	32	16.5381	0.448276	32	20.8352	0.522463	32	16.1015	0.326546	32	32.2641	0.550203	32	21.768	24.11	4	1816.18	-1.9875	1
vFTTVGSAEk	1	1	1	W5Q6U0	N-Term(iTRAQ8plex); K10(iTRAQ8plex)	0.711756	1		2.21474	1		2.86488	1		1.15592	1		1.18386	1		24.07	3	1646.95	-2.70578	0
lVEQQNPk	4	2	1	F5CC79	N-Term(iTRAQ8plex); K8(iTRAQ8plex)	0.750443	4	3.67737	0.788104	4	17.7336	1.00161	4	9.01523	0.887068	4	25.1847	0.840429	4	28.4031	24.05	2	1563.93	0.0542565	0
mLGVPVNR	4	1	1	W5PMT0	N-Term(iTRAQ8plex)	1.01457	4	11.3183	0.835278	4	5.00012	0.801477	4	7.52205	0.904538	4	8.14425	0.83163	4	1.14019	24.02	2	1189.7	-0.695413	0
dLcETVk	3	3	3	W5P5T4;W5NPK5;O46544	N-Term(iTRAQ8plex); C3(Carbamidomethyl); K7(iTRAQ8plex)																23.95	2	1472.81	-6.21968	0
tVSTEcAk	1	1	1	W5PGT9	N-Term(iTRAQ8plex); C6(Carbamidomethyl); K8(iTRAQ8plex)	0.245129	1		0.111281	1		0.163788	1		0.175826	1		0.130868	1		23.83	2	1503.83	-1.51289	0
tHkGEEFPSMSESR	2	1	1	W5NPT7	N-Term(iTRAQ8plex); K3(iTRAQ8plex)	0.896293	2	16.464	1.01403	2	35.498	0.932133	2	24.6004	0.851693	2	19.204	0.821518	2	22.547	23.75	4	2230.13	-1.73585	1
aAQVTIk	1	1	1	W5NSA6	N-Term(iTRAQ8plex); K7(iTRAQ8plex)	1.3308	1		1.55666	1		1.71307	1		1.19623	1		1.16935	1		23.7	2	1338.85	-7.22408	0
fFTFHADIcTLPDTEk	1	2	2	P14639;W5PWE9	N-Term(iTRAQ8plex); C9(Carbamidomethyl); K16(iTRAQ8plex)																23.69	4	2550.3	-5.02058	0
tDWAIGVcR	8	1	1	W5NPT7	N-Term(iTRAQ8plex); C8(Carbamidomethyl)	1.07357	8	14.511	1.00555	8	18.2712	1.05712	8	16.435	1.04205	8	26.6085	0.936665	8	21.6279	23.63	2	1381.72	-2.19926	0
mVQEAEk	3	5	2	W5PG95;W5NPN4	N-Term(iTRAQ8plex); K7(iTRAQ8plex)																23.58	2	1442.81	-3.68746	0
lScHFPck	1	1	1	W5P9V5	N-Term(iTRAQ8plex); C3(Carbamidomethyl); C7(Carbamidomethyl); K8(iTRAQ8plex)	0.756135	1		0.934616	1		0.997719	1		1.33926	1		1.23189	1		23.57	3	1656.88	-2.51925	0
mSAVTGPVPR	1	1	1	W5Q5H8	N-Term(iTRAQ8plex); M1(Oxidation)	2.10907	1		2.787	1		2.54827	1		1.38733	1		1.1946	1		23.53	2	1334.74	-1.38103	0
lPPNVVEESAR	1	1	1	W5NSA6	N-Term(iTRAQ8plex)	1.36593	1		1.42591	1		1.26901	1		0.813298	1		0.690939	1		23.51	2	1514.84	-2.4051	0
iEANQGSR	2	1	1	W5NRI1	N-Term(iTRAQ8plex)	0.904418	2	1.51777	0.995845	2	18.5795	1.01928	2	21.0513	1.15536	2	5.10244	1.24392	2	31.9421	23.43	2	1178.64	-0.731169	0
mPEDcVPTFR	3	1	1	W5PSD8	N-Term(iTRAQ8plex); C5(Carbamidomethyl)	1.31159	3	7.01502	0.979416	3	10.6495	1.03341	3	3.987	0.808544	3	0.129725	0.941383	3	0.992364	23.42	3	1555.75	-1.67748	0
fQDANVLLTFR	1	2	1	W5PSA3	N-Term(iTRAQ8plex)	0.829304	1		0.757536	1		0.703007	1		1.39359	1		1.28287	1		23.31	2	1627.91	-2.27724	0
gEAGEmELFASTQNPmk	4	1	1	W5PMT0	N-Term(iTRAQ8plex); M6(Oxidation); M16(Oxidation); K17(iTRAQ8plex)	1.19171	4	4.20073	1.51712	4	12.1486	1.20656	4	7.99876	1.37473	4	8.24785	1.20999	4	7.80563	23.19	3	2480.22	-1.18852	0
iHDAQDk	5	1	1	A6ZE99	N-Term(iTRAQ8plex); K7(iTRAQ8plex)	1.10524	5	7.83849	0.937023	5	4.62812	1.05059	5	4.7077	1.21988	5	9.67462	1.17638	5	15.4717	23.16	3	1434.81	-4.68387	0
aTEGEGSEQk	1	2	1	P32262	N-Term(iTRAQ8plex); K10(iTRAQ8plex)	1.02006	1		1.11362	1		1.7099	1		1.31271	1		1.27964	1		23.07	3	1643.86	-4.28094	0
acGVcPLWEk	1	1	1	W5PH81	N-Term(iTRAQ8plex); C2(Carbamidomethyl); C5(Carbamidomethyl); K10(iTRAQ8plex)	1.46965	1		1.13346	1		1.17174	1		1.16681	1		1.04454	1		23.04	3	1827.97	-0.69795	0
eELDTNk	2	1	1	W5PSQ7	N-Term(iTRAQ8plex); K7(iTRAQ8plex)	0.58786	2	18.4545	0.541504	2	9.97497	0.645085	2	8.41696	0.905289	2	11.113	1.26768	2	7.53847	22.91	2	1456.8	-5.70548	0
gIVGSFEELcR	1	1	1	W5PCL4	N-Term(iTRAQ8plex); C10(Carbamidomethyl)	1.47703	1		1.43531	1		1.34772	1		1.58728	1		1.40028	1		22.85	2	1570.82	-1.17162	0
lDQQVEDFR	1	1	1	W5NWM2	N-Term(iTRAQ8plex)	1.05425	1		1.04417	1		1.43358	1		1.19627	1		1	1		22.73	2	1453.75	-6.16734	0
iFADADLSGITGTR	2	1	1	W5PHI7	N-Term(iTRAQ8plex)	0.850258	2	2.47195	1.12691	2	6.44772	1.18202	2	0.703502	0.796463	2	3.85213	0.840609	2	14.308	22.69	2	1740.95	1.81482	0
sGVSLAALk	2	2	1	W5NS65	N-Term(iTRAQ8plex); K9(iTRAQ8plex)	1.04643	2	4.838	1.13966	2	3.40694	0.674858	2	15.1442	0.599133	2	0.391445	0.804372	2	2.40223	22.61	2	1453.91	-5.55091	0
qPQNQNPk	10	1	1	W5Q3I2	N-Term(iTRAQ8plex); K8(iTRAQ8plex)	1.01865	10	11.3506	0.775148	10	39.0341	1.13046	10	37.4756	1.83006	10	56.9849	1.95613	10	38.6556	22.53	2	1561.89	-3.59433	0
sAAENEAVTQLVR	1	1	1	W5NUD7	N-Term(iTRAQ8plex)	2.14656	1		1.50487	1		2.27065	1		1.4159	1		2.22274	1		22.53	2	1691.92	-1.58141	0
tPEVDNEALEkFDk	9	3	1	P67975	N-Term(iTRAQ8plex); K11(iTRAQ8plex); K14(iTRAQ8plex)	0.313497	9	16.8723	0.282498	9	16.4536	0.183429	9	39.1642	0.137538	9	45.3209	0.17518	9	22.4286	22.53	4	2547.4	-1.18549	1
dGNTLTYYR	1	1	1	W5PID9	N-Term(iTRAQ8plex)	1.71	1		1.70891	1		1.78592	1		2.19215	1		2.13557	1		22.43	2	1406.72	-1.39839	0
lSSATLASSPNR	2	1	1	W5PV41	N-Term(iTRAQ8plex)	1.81829	2	57.8662	2.04996	2	5.94274	2.09288	2	54.0513	1.5716	2	87.7604	1.42607	2	84.4411	22.3	2	1507.83	-3.49373	0
gDVFTHYTck	5	2	1	W5PNP1	N-Term(iTRAQ8plex); C9(Carbamidomethyl); K10(iTRAQ8plex)	0.909196	5	5.92861	0.923614	5	22.1271	0.785452	5	16.5927	0.873268	5	6.19647	0.848515	5	10.3515	22.26	3	1835.95	-1.54609	0
eTLQQMAEVTR	1	1	1	W5QAL0	N-Term(iTRAQ8plex)	0.486259	1		0.508172	1		0.447036	1		0.540039	1		0.742616	1		22.24	2	1609.85	-2.23186	0
tcEEcLk	1	2	1	W5PRX0	N-Term(iTRAQ8plex); C2(Carbamidomethyl); C5(Carbamidomethyl); K7(iTRAQ8plex)	1.87931	1		2.17892	1		2.61025	1		3.40276	1		3.2308	1		22.06	2	1547.8	-4.09069	0
vTMQNLNDR	1	6	1	W5Q6L8	N-Term(iTRAQ8plex)	2.36706	1		2.46666	1		2.10869	1		2.19182	1		3.33209	1		21.98	2	1394.73	-1.22931	0
nVDTNQDR	1	1	1	W5PS94	N-Term(iTRAQ8plex)	0.96672	1		0.595676	1		0.677763	1		0.931308	1		0.78484	1		21.97	2	1265.63	-6.10941	0
gEGFLck	1	2	1	W5P5I0	N-Term(iTRAQ8plex); C6(Carbamidomethyl); K7(iTRAQ8plex)	0.680998	1		0.5739	1		0.473349	1		0.421033	1		0.285068	1		21.9	2	1418.78	-7.35097	0
gSLFFNPk	15	3	1	W5PZI1	N-Term(iTRAQ8plex); K8(iTRAQ8plex)	1.04878	15	9.31521	1.84304	15	25.7194	0.916323	15	27.906	0.930728	15	8.36702	1.01074	15	19.9825	21.75	3	1517.89	-3.65351	0
dVSSLDGTQR	1	1	1	W5Q6U0	N-Term(iTRAQ8plex)	0.848479	1		1.5669	1		1.1094	1		1.07646	1		1.08158	1		21.71	2	1381.72	-2.06207	0
eYVLPSFEVQLEPEEk	1	1	1	W5NRI1	N-Term(iTRAQ8plex); K16(iTRAQ8plex)	0.608205	1		0.528312	1		0.59876	1		0.68805	1		0.682402	1		21.7	3	2544.37	0.678597	0
gTEATcTR	1	2	1	D6PZY4	N-Term(iTRAQ8plex); C6(Carbamidomethyl)	1.5342	1		1.42374	1		1.77377	1		1.23191	1		0.750297	1		21.65	2	1199.6	0.987075	0
eQQcVIMGESSk	1	1	1	W5P3R3	N-Term(iTRAQ8plex); C4(Carbamidomethyl); K12(iTRAQ8plex)	0.919205	1		0.92158	1		1.3472	1		1.06284	1		1.0353	1		21.62	2	2004.04	1.34829	0
eQGQNLAR	1	2	1	W5NSD5	N-Term(iTRAQ8plex)	1.25082	1		0.96911	1		1.09459	1		1.11437	1		1.04148	1		21.39	2	1219.67	2.44633	0
sHcIAEVDk	1	2	2	P14639;W5PWE9	N-Term(iTRAQ8plex); C3(Carbamidomethyl); K9(iTRAQ8plex)																21.39	3	1666.9	-3.19477	0
tVYVSDDTR	1	1	1	W5NZU3	N-Term(iTRAQ8plex)	0.91359	1		0.763704	1		1.05113	1		0.868968	1		1.05383	1		21.29	2	1359.71	-0.385014	0
tVGWNVPVGYLVESGR	1	1	1	W5QGM9	N-Term(iTRAQ8plex)	0.754858	1		0.841959	1		0.56903	1		0.501508	1		0.407739	1		21.23	2	2037.1	-2.77025	0
lLDNWDTLASTLSk	1	1	1	W5NX51	N-Term(iTRAQ8plex); K14(iTRAQ8plex)	1.21117	1		1.08047	1		1.13631	1		1.20246	1		1.37311	1		21.22	3	2185.23	0.0630747	0
eTGWPFcADEDWGEk	1	1	1	W5Q5H8	N-Term(iTRAQ8plex); C7(Carbamidomethyl); K15(iTRAQ8plex)	1.54934	1		1.68498	1		1.98466	1		1.40548	1		1.41616	1		21.05	3	2435.15	2.08504	0
vAcTVPSEcEk	2	1	1	P53791	N-Term(iTRAQ8plex); C3(Carbamidomethyl); C9(Carbamidomethyl); K11(iTRAQ8plex)	1.02932	2	23.8848	1.2595	2	21.9691	1.37672	2	0.0113518	1.36674	2	5.10296	1.36671	2	10.2011	20.87	3	1887.98	1.16132	0
dFVPNSVSFSWk	4	1	1	W5NXW9	N-Term(iTRAQ8plex); K12(iTRAQ8plex)	0.534565	4	10.8377	0.439885	4	9.47735	0.463192	4	10.8991	0.507706	4	33.6273	0.556402	4	34.6368	20.76	3	2021.09	-1.1888	0
eDALNDTR	1	2	1	W5PZI1	N-Term(iTRAQ8plex)	1.63015	1		5.05607	1		1.54991	1		1.59856	1		2.39852	1		20.67	2	1237.63	0.29158	0
hAVSEGTk	1	20	1	W5PUF2	N-Term(iTRAQ8plex); K8(iTRAQ8plex)	1.03813	1		0.919499	1		0.416057	1		0.404736	1		0.63083	1		20.63	3	1436.83	-1.3176	0
vkETMVPk	51	2	1	P11839	N-Term(iTRAQ8plex); K2(iTRAQ8plex); K8(iTRAQ8plex)	0.975858	51	14.4101	0.975721	51	16.7436	1.73336	51	13.442	1.1878	51	15.124	2.01155	51	13.1151	20.54	2	1844.14	-2.93349	1
vEISYTPSDGSPk	1	1	1	W5QCD6	N-Term(iTRAQ8plex); K13(iTRAQ8plex)	1.60626	1		2.22225	1		0.814428	1		0.842917	1		0.822935	1		20.48	3	1988.07	-5.97974	0
sYLSMVGSccTSPNPTAcFLk	1	2	1	W5PTG9	N-Term(iTRAQ8plex); C9(Carbamidomethyl); C10(Carbamidomethyl); C18(Carbamidomethyl); K21(iTRAQ8plex)	1.04575	1		0.827358	1		1.20337	1		1.03032	1		1.2247	1		20.48	3	2988.46	0.603943	0
tVEAcNLPIVR	1	1	1	W5P812	N-Term(iTRAQ8plex); C5(Carbamidomethyl)	0.890063	1		1.0898	1		1.20882	1		0.776715	1		0.534996	1		20.47	2	1575.88	-0.588637	0
vGQYSGDLR	1	1	1	W5NRH2	N-Term(iTRAQ8plex)	0.865127	1		0.900595	1		1.05003	1		1.41911	1		1.14076	1		20.35	2	1298.7	-1.89696	0
vIAAEGEmNASR	1	1	1	W5P601	N-Term(iTRAQ8plex); M8(Oxidation)	0.711718	1		0.728076	1		0.550955	1		0.656406	1		0.598201	1		20.31	2	1567.8	-1.39698	0
aIGGTLPQR	1	1	1	W5Q6U0	N-Term(iTRAQ8plex)	0.86722	1		1.45171	1		1.08374	1		0.847257	1		0.852221	1		20.11	2	1216.73	-3.96073	0
aQYEEIAQR	1	4	1	W5Q6B8	N-Term(iTRAQ8plex)	3.30042	1		1.9941	1		1.75285	1		1.97038	1		3.02786	1		20.1	2	1411.74	-3.00702	0
eLQEMSTEGSk	3	3	1	W5PZI1	N-Term(iTRAQ8plex); K11(iTRAQ8plex)	1.28841	3	1.23534	2.64824	3	12.0814	1.86264	3	30.5644	2.10781	3	41.5887	1.90455	3	47.1644	20.02	2	1846.97	0.466796	0
fPQLNETSFANSR	2	2	1	W5Q6U0	N-Term(iTRAQ8plex)	1.05773	2	12.3365	1.30407	2	38.685	0.84014	2	38.6308	0.866843	2	54.4382	0.818443	2	49.3932	19.99	3	1814.93	-1.63033	0
qHVDPDTTGGNDGYcNLMMQR	1	1	1	W5PTS4	N-Term(iTRAQ8plex); C15(Carbamidomethyl)	1.60546	1		0.814759	1		0.943888	1		0.945167	1		1.16123	1		19.98	3	2713.2	-1.92683	0
lEGTPQcSLR	2	1	1	W5PSD8	N-Term(iTRAQ8plex); C7(Carbamidomethyl)	1.46913	2	19.7994	1.13567	2	12.6056	1.27133	2	16.5049	1.16409	2	5.47073	0.969718	2	19.0127	19.93	2	1464.78	0.333717	0
eIPLSPMGEDSASGDIETLHSk	2	1	1	Q6RUR7	N-Term(iTRAQ8plex); K22(iTRAQ8plex)	0.91575	2	6.36255	0.693652	2	4.03489	1.02263	2	11.7391	1.13958	2	22.2266	1.00056	2	27.274	19.93	3	2921.51	2.68515	0
vGITSINk	2	1	1	W5Q124	N-Term(iTRAQ8plex); K8(iTRAQ8plex)	1.68358	2	10.5163	1.93574	2	0.828812	1.89341	2	2.65176	1.32434	2	4.04728	1.24722	2	13.5975	19.75	2	1439.9	-0.833111	0
wYTVGVAGNAIk	3	1	1	W5PMH6	N-Term(iTRAQ8plex); K12(iTRAQ8plex)	2.2286	3	3.01607	1.88835	3	19.2629	1.92121	3	1.28158	1.95846	3	4.99478	1.91214	3	7.77655	19.74	3	1887.1	2.59356	0
eYTDASFSNQk	1	3	1	Q9XT27	N-Term(iTRAQ8plex); K11(iTRAQ8plex)	1.12619	1		1.0564	1		1.54952	1		1.21947	1		1.08639	1		19.69	2	1897.98	2.29111	0
vPAHAVVVR	1	1	1	W5QGM9	N-Term(iTRAQ8plex)	0.404266	1		0.968321	1		1.2556	1		0.458013	1		0.758689	1		19.66	3	1251.78	-1.59475	0
vYPTVNcQSPGR	1	2	1	W5QH45	N-Term(iTRAQ8plex); C7(Carbamidomethyl)	1.34865	1		1.60893	1		1.73409	1		1.738	1		1.09617	1		19.6	2	1681.86	-0.239414	0
eYFYSPDPLYk	1	1	1	W5PZD0	N-Term(iTRAQ8plex); K11(iTRAQ8plex)	1.01832	1		1.11224	1		1.36951	1		1.29652	1		1.30322	1		19.49	3	2030.06	-8.75311	0
sDAQPSVFLFkPSEEQLR	3	1	1	W5QHZ5	N-Term(iTRAQ8plex); K11(iTRAQ8plex)	0.170038	3	73.8516	0.133054	3	103.311	0.183487	3	185.134	0.216547	3	91.712	0.160658	3	120.325	19.49	3	2686.47	0.267909	0
fTTLcVTcVPENckPWSLR	2	2	1	W5PMT0	N-Term(iTRAQ8plex); C5(Carbamidomethyl); C8(Carbamidomethyl); C13(Carbamidomethyl); K14(iTRAQ8plex)	0.852965	2	15.8312	0.704132	2	25.9172	0.567099	2	13.9189	0.45938	2	20.6839	0.4973	2	18.9031	19.45	4	2976.53	-3.25741	0
iTVDDkHYQk	14	6	3	E7BQS5;P04654;E7BQS3	N-Term(iTRAQ8plex); K6(iTRAQ8plex); K10(iTRAQ8plex)																19.39	2	2159.26	-1.53877	1
mAADcAQELR	1	1	1	W5QCV4	N-Term(iTRAQ8plex); C5(Carbamidomethyl)	1.24329	1		0.581328	1		0.637949	1		0.593614	1		0.577437	1		19.23	2	1468.72	-1.40855	0
hVVPNEVVVQR	1	2	1	F2YQ13	N-Term(iTRAQ8plex)	1.84109	1		2.28923	1		2.11916	1		2.02362	1		1.73972	1		19.21	3	1579.92	-0.345769	0
dPSGFSPEVQk	1	1	1	W5NZ47	N-Term(iTRAQ8plex); K11(iTRAQ8plex)	1.1241	1		2.0822	1		1.78806	1		1.51547	1		1.63503	1		19.11	3	1798.98	-1.65352	0
iSGLIYEETR	1	10	1	W5QGB5	N-Term(iTRAQ8plex)	1.67885	1		1.302	1		0.775717	1		0.810885	1		0.90088	1		18.98	2	1484.82	-3.70751	0
vLPScDLAR	1	1	1	W5QCV4	N-Term(iTRAQ8plex); C5(Carbamidomethyl)	1.16199	1		0.63776	1		0.708625	1		0.72447	1		0.670925	1		18.96	2	1334.74	-1.5557	0
sAPSVTLFPPSkEELDTNk	21	1	1	W5PSQ7	N-Term(iTRAQ8plex); K12(iTRAQ8plex); K19(iTRAQ8plex)	0.435312	21	17.5979	0.340301	21	13.0249	0.485386	21	23.253	0.475853	21	23.1176	0.664828	21	24.8625	18.95	4	2972.67	-0.822706	1
ccAADDkEGcFVLEGPk	2	2	2	P14639;W5PWE9	N-Term(iTRAQ8plex); C1(Carbamidomethyl); C2(Carbamidomethyl); K7(iTRAQ8plex); C10(Carbamidomethyl); K17(iTRAQ8plex)																18.87	4	2868.43	-5.05091	1
qTFGEAIk	1	2	1	Q9MZS8	N-Term(iTRAQ8plex); K8(iTRAQ8plex)	0.724322	1		0.539128	1		0.57764	1		0.550572	1		0.572883	1		18.67	2	1501.87	-7.55949	0
gAQGVILVYDVTR	1	1	1	W5Q3W4	N-Term(iTRAQ8plex)	1.25544	1		1.24668	1		1.96098	1		2.55301	1		3.28059	1		18.66	2	1694.97	-3.325	0
dAAGGPGAPADPGRPAGHSGSSk	2	1	1	W5P9V5	N-Term(iTRAQ8plex); K23(iTRAQ8plex)	1.13096	2	19.9637	0.824217	2	10.3781	1.27239	2	19.4868	1.66957	2	14.4707	1.74271	2	12.4394	18.57	4	2625.35	-4.19302	0
nEcFLNHkDDSPDLPk	4	2	2	P14639;W5PWE9	N-Term(iTRAQ8plex); C3(Carbamidomethyl); K8(iTRAQ8plex); K16(iTRAQ8plex)																18.21	4	2841.48	-5.11873	1
vEEQGSQIR	1	2	1	Q7M2U8	N-Term(iTRAQ8plex)	0.634029	1		0.460576	1		0.408763	1		0.624332	1		0.600717	1		18.16	2	1349.73	-2.50099	0
sPALGAANR	1	2	1	Q9MZY2	N-Term(iTRAQ8plex)	2.01458	1		1.8585	1		3.80612	1		1.78117	1		2.19744	1		18.15	2	1160.66	-5.2228	0
dGDAcQSR	1	1	1	W5Q1W8	N-Term(iTRAQ8plex); C5(Carbamidomethyl)	0.936589	1		0.67934	1		0.95698	1		0.942072	1		0.917441	1		18.07	2	1212.56	-1.9493	0
eNLQFSAALR	1	2	1	Q009B1	N-Term(iTRAQ8plex)	1.44382	1		1.07477	1		0.926728	1		0.810787	1		1.00948	1		18.04	2	1452.81	0.465268	0
vDAEVWk	6	1	1	W5PGE9	N-Term(iTRAQ8plex); K7(iTRAQ8plex)	1.02808	6	23.2865	0.882532	6	25.5864	0.726158	6	25.3705	0.823134	6	24.9687	0.98675	6	14.0992	18.03	2	1454.84	-4.19547	0
eTTLAANQFLAYASR	1	1	1	W5PS45	N-Term(iTRAQ8plex)	1.14544	1		0.956725	1		1.25066	1		1.23843	1		1.5638	1		17.92	2	1960.04	-3.45921	0
aLETHTYFER	2	1	1	W5NXW9	N-Term(iTRAQ8plex)	0.640341	2	51.118	0.537219	2	19.3372	0.543198	2	29.4571	0.57298	2	50.0245	0.684087	2	35.5656	17.81	3	1570.81	-3.13186	0
nLEENYcR	2	1	1	W5P3R3	N-Term(iTRAQ8plex); C7(Carbamidomethyl)	1.0173	2	16.1877	0.9338	2	13.4024	1.28397	2	7.32149	0.937641	2	2.75146	0.929547	2	1.76072	17.72	2	1401.67	-2.81386	0
lNPHWDGEk	2	2	1	Q9MZY2	N-Term(iTRAQ8plex); K9(iTRAQ8plex)	1.10625	2	40.2905	1.15574	2	35.033	1.64205	2	47.6003	1.41424	2	47.7498	1.42996	2	48.9519	17.72	3	1703.92	-4.59793	0
lcTTScEEVIR	1	1	1	E7BQS3	N-Term(iTRAQ8plex); C2(Carbamidomethyl); C6(Carbamidomethyl)	1.70917	1		1.60814	1		0.636971	1		1.09592	1		0.738781	1		17.51	2	1671.83	-1.61526	0
aTFDAISk	1	2	1	W5Q3H4	N-Term(iTRAQ8plex); K8(iTRAQ8plex)	0.359351	1		0.515216	1		0.366435	1		0.279926	1		0.217509	1		17.33	2	1460.85	-3.88637	0
dMNYVSPIIR	1	1	1	W5P6F4	N-Term(iTRAQ8plex)	1.18009	1		0.916587	1		1.0662	1		0.884165	1		0.628415	1		17.27	2	1511.81	-5.08542	0
iDQDELSk	19	1	1	W5P737	N-Term(iTRAQ8plex); K8(iTRAQ8plex)	1.48662	19	13.1218	1.33637	19	38.2296	2.13247	19	24.4748	2.59133	19	35.8238	2.93748	19	35.4358	16.74	2	1555.87	-2.4782	0
dTGLGLSPTASLR	1	1	1	W5NSA6	N-Term(iTRAQ8plex)	1.04601	1		1.25234	1		0.993657	1		1.66999	1		1.62672	1		16.68	2	1591.89	-4.32804	0
lEDcSPQR	2	1	1	W5NW65	N-Term(iTRAQ8plex); C4(Carbamidomethyl)	1.03705	2	77.8147	1.15385	2	92.5493	1.41975	2	114.255	1.84752	2	130.345	1.51971	2	117.55	16.43	2	1308.65	-2.85359	0
sEDLYLYLGER	1	3	1	Q9XT27	N-Term(iTRAQ8plex)	0.980412	1		0.912814	1		1.1456	1		0.742866	1		0.689726	1		16.36	2	1661.87	-0.513747	0
vLPSATLEAEQPR	1	1	1	W5NQP5	N-Term(iTRAQ8plex)	2.72111	1		1.93735	1		1.99646	1		2.36834	1		2.20229	1		16.29	2	1714.96	-0.707348	0
vVIAcEGNPEVPVHFDk	2	1	1	W5PTS4	N-Term(iTRAQ8plex); C5(Carbamidomethyl); K17(iTRAQ8plex)	1.42806	2	11.5042	0.948261	2	8.864	1.37312	2	44.2347	1.13416	2	9.85706	1.37572	2	16.5279	16.28	4	2518.35	-2.20355	0
dVScVNPPQVENAIIQNQk	1	2	1	D6PZY4	N-Term(iTRAQ8plex); C4(Carbamidomethyl); K19(iTRAQ8plex)	1.39337	1		1.01104	1		1.38695	1		1.15892	1		1.317	1		16.19	3	2761.46	-5.57084	0
lYDDRNEPVLR	1	1	1	W5PY10	N-Term(iTRAQ8plex)	2.1925	1		2.08943	1		2.45213	1		1.97279	1		2.36767	1		16.05	3	1693.92	0.500504	1
sSELVSANR	1	2	1	P32262	N-Term(iTRAQ8plex)	1.47729	1		1.5674	1		2.30524	1		1.78536	1		2.06262	1		15.91	2	1266.69	-3.62025	0
gAEEQLVPR	1	1	1	W5P101	N-Term(iTRAQ8plex)	0.948525	1		1.1402	1		1.24269	1		1.01005	1		1.14227	1		15.88	2	1302.73	0.959978	0
tITGDcNNR	5	2	1	Q9MZY2	N-Term(iTRAQ8plex); C6(Carbamidomethyl)	1.48063	5	37.5077	2.50083	5	46.3875	2.5745	5	34.1769	1.73701	5	52.3479	1.68044	5	35.7453	15.81	2	1354.67	-0.583923	0
tSGLITcLk	2	1	1	D6PZY4	N-Term(iTRAQ8plex); C7(Carbamidomethyl); K9(iTRAQ8plex)	0.938401	2	10.3148	1.52446	2	34.5768	1.81653	2	30.7124	1.4899	2	31.1688	1.00075	2	3.8825	15.77	3	1600.95	-1.19494	0
gTVTDFPGFNER	1	1	1	W5PZM9	N-Term(iTRAQ8plex)	0.747933	1		0.945131	1		0.800484	1		0.336609	1		0.374276	1		15.72	2	1643.83	-3.23934	0
wcAISPPEGSk	1	5	1	D3G9G3	N-Term(iTRAQ8plex); C2(Carbamidomethyl); K11(iTRAQ8plex)	1.04364	1		1.80784	1		0.657678	1		0.719262	1		0.789047	1		15.69	3	1839.98	-4.57163	0
iWckDDQNPHSR	2	2	2	W5QD52;P09462	N-Term(iTRAQ8plex); C3(Carbamidomethyl); K4(iTRAQ8plex)																15.63	4	2164.11	-2.14195	1
eGTTAELVk	2	1	1	W5P0U4	N-Term(iTRAQ8plex); K9(iTRAQ8plex)	1.31938	2	11.7994	0.886155	2	10.275	1.21479	2	12.7661	1.50971	2	5.31857	1.63045	2	11.2189	15.47	2	1555.91	-3.82028	0
dTQSIIFLGR	1	1	1	W5NXP3	N-Term(iTRAQ8plex)	0.991866	1		1.23422	1		1.13934	1		0.603189	1		1.23893	1		15.22	2	1453.83	-4.07897	0
hPHPHLSFmAIPPk	12	5	1	P02669	N-Term(iTRAQ8plex); M9(Oxidation); K14(iTRAQ8plex)	1.2591	12	12.6882	1.08788	12	11.8841	1.4056	12	6.89548	1.47624	12	14.1359	1.7311	12	18.4123	14.99	5	2233.25	-2.49495	0
gVLFASGQNLAR	1	1	1	W5NZQ2	N-Term(iTRAQ8plex)	1.17011	1		1.09796	1		0.665622	1		0.511457	1		0.625755	1		14.86	2	1536.88	-2.68025	0
tEDTIEFTcR	1	1	1	B5B304	N-Term(iTRAQ8plex); C9(Carbamidomethyl)	1.42245	1		0.666742	1		1.02565	1		0.791101	1		0.694358	1		14.85	2	1575.76	-3.66285	0
sAVEDEGLk	1	3	1	W5PG95	N-Term(iTRAQ8plex); K9(iTRAQ8plex)	0.748638	1		1.10545	1		0.864401	1		0.841778	1		0.595033	1		14.83	2	1555.88	-1.54314	0
qDGSVDFGR	1	2	1	W5NQ46	N-Term(iTRAQ8plex)	1.73709	1		1.75138	1		1.68287	1		1.38448	1		1.35833	1		14.82	2	1284.65	-2.37878	0
yYTYMIMNk	1	1	1	W5NRI1	N-Term(iTRAQ8plex); K9(iTRAQ8plex)	0.901276	1		1.18629	1		1.41829	1		1.46256	1		1.35339	1		14.79	3	1834.96	-4.43531	0
aMkPWTQPk	82	6	4	E7BQS5;P04654;E7BQS3;E7BQS2	N-Term(iTRAQ8plex); K3(iTRAQ8plex); K9(iTRAQ8plex)																14.54	3	1999.19	-1.3134	0
tQIEQTNEER	9	2	1	W5PZI1	N-Term(iTRAQ8plex)	1.05201	9	21.019	2.98771	9	19.2462	0.783474	9	2.69591	0.533019	9	10.9133	0.417228	9	20.5937	14.52	2	1551.79	-3.44043	0
vSLSATGFYR	3	2	1	W5PMT0	N-Term(iTRAQ8plex)	0.984153	3	10.0908	0.810372	3	6.18017	0.879794	3	9.13005	1.03282	3	2.04676	1.10166	3	2.32138	14.41	2	1404.78	-0.799942	0
yAFQEALNSAGEk	2	1	1	P50413	N-Term(iTRAQ8plex); K13(iTRAQ8plex)	1.06108	2	27.4656	1.29984	2	29.631	1.27491	2	39.4471	1.52044	2	36.4499	1.33291	2	42.4418	14.41	3	2036.09	-2.45603	0
aYQQALcR	3	1	1	A6ZE99	N-Term(iTRAQ8plex); C7(Carbamidomethyl)	1.19717	3	0.247031	1.15238	3	11.8526	1.13767	3	8.63418	1.441	3	33.5255	1.5755	3	28.392	14.1	2	1313.69	-1.01613	0
aLTEDVYQPR	1	1	1	W5NSA6	N-Term(iTRAQ8plex)	1.26831	1		1.06833	1		1.01052	1		0.795282	1		0.905086	1		14.1	2	1495.8	-2.1202	0
eccDkPVLEk	3	2	2	P14639;W5PWE9	N-Term(iTRAQ8plex); C2(Carbamidomethyl); C3(Carbamidomethyl); K5(iTRAQ8plex); K10(iTRAQ8plex)																14.01	2	2190.19	-3.8535	0
lLVVYPWTQR	1	14	1	P02075	N-Term(iTRAQ8plex)	0.909502	1		0.230303	1		0.232818	1		0.287275	1		0.379367	1		14.01	2	1578.93	-1.40143	0
dGGIDPLVR	4	2	1	Q9MZY2	N-Term(iTRAQ8plex)	1.81739	4	23.6848	1.69259	4	49.4048	2.92233	4	39.9079	2.1623	4	22.0539	1.99545	4	31.0144	13.98	2	1245.71	-4.11127	0
yTPVEAIEk	1	1	1	W5PID9	N-Term(iTRAQ8plex); K9(iTRAQ8plex)	1.60595	1		1.77743	1		2.73867	1		2.96851	1		2.67407	1		13.72	3	1657.96	-1.64453	0
lFEAEAQDLFR	1	1	1	W5QGX7	N-Term(iTRAQ8plex)	1.01287	1		0.954239	1		1.12375	1		0.911867	1		0.953359	1		13.56	2	1642.87	-1.60796	0
tTVVLAPLGDDFR	1	1	1	W5QC34	N-Term(iTRAQ8plex)	0.565936	1		0.469643	1		0.511738	1		0.502887	1		0.494859	1		13.51	2	1707.95	-4.02686	0
hPHPHLSFMAIPPk	18	5	1	P02669	N-Term(iTRAQ8plex); K14(iTRAQ8plex)	1.08836	18	25.4977	1.14061	18	22.3684	1.4745	18	16.4241	1.71109	18	13.0313	2.1158	18	18.6661	13.45	5	2217.25	-1.46175	0
cGLGISSR	2	1	1	W5P9V5	N-Term(iTRAQ8plex); C1(Carbamidomethyl)	1.09055	2	6.25018	1.1482	2	35.8806	1.02762	2	23.6356	1.49125	2	34.9262	1.82537	2	123.128	13.43	2	1153.63	-1.11259	0
aGLYGLPR	2	1	1	W5Q6U0	N-Term(iTRAQ8plex)	1.00924	2	7.21249	1.40851	2	3.20137	0.939459	2	17.965	0.674741	2	23.9994	0.853541	2	22.1485	13.25	2	1150.68	-3.25828	0
gSmILDIcTk	1	2	2	W5P5T4;W5NPK5	N-Term(iTRAQ8plex); M3(Oxidation); C8(Carbamidomethyl); K10(iTRAQ8plex)																13.22	2	1761.97	0.11355	0
eEELYAcQR	1	1	1	W5PAC0	N-Term(iTRAQ8plex); C7(Carbamidomethyl)	0.649626	1		1.14014	1		1.23412	1		1.67969	1		1.02951	1		12.81	2	1501.73	0.983681	0
aLWTGALTPGR	1	1	1	W5P101	N-Term(iTRAQ8plex)	0.913788	1		0.886314	1		1.34082	1		0.726748	1		0.907892	1		12.62	2	1446.84	0.332251	0
vTVEVIPR	1	2	1	C8BKD1	N-Term(iTRAQ8plex)	0.77299	1		0.596279	1		0.843732	1		0.725406	1		0.564198	1		12.56	2	1216.76	-0.0508765	0
ccAkPESER	4	2	2	P14639;W5PWE9	N-Term(iTRAQ8plex); C1(Carbamidomethyl); C2(Carbamidomethyl); K4(iTRAQ8plex)																12.54	2	1744.88	-6.69618	0
yIETDPANR	1	2	1	F2YQ13	N-Term(iTRAQ8plex)	1.95287	1		0.867082	1		1.23008	1		1.06889	1		1.16078	1		11.92	2	1382.72	-1.17227	0
cGLVPVMAENR	1	4	1	D3G9G3	N-Term(iTRAQ8plex); C1(Carbamidomethyl)	1.05769	1		1.71709	1		0.631351	1		0.827694	1		0.715657	1		11.91	2	1549.81	-2.51743	0
fDSWPcVMGR	3	1	1	W5NPT7	N-Term(iTRAQ8plex); C6(Carbamidomethyl)	1.12558	3	2.08358	1.05696	3	14.957	1.26665	3	5.01264	1.21285	3	8.9608	1.32364	3	18.9915	11.58	2	1558.74	-0.819524	0
dVAmkPPSVYVLPPTR	2	1	1	W5NXW9	N-Term(iTRAQ8plex); M4(Oxidation); K5(iTRAQ8plex)	0.666817	2	20.433	0.662737	2	26.1169	0.440764	2	5.63624	0.408087	2	40.3751	0.472059	2	20.0306	11.1	3	2394.37	-1.04031	0
eLQQAVLQMEQR	1	1	1	W5PS94	N-Term(iTRAQ8plex)	1.17319	1		1.25341	1		1.02924	1		1.03787	1		0.851745	1		10.92	2	1776.94	-9.94186	0
fLDDDLTDDIMcVk	3	1	1	P09462	N-Term(iTRAQ8plex); C12(Carbamidomethyl); K14(iTRAQ8plex)	1.13646	3	20.8902	1.17919	3	39.5925	1.19637	3	3.05133	1.46383	3	60.7725	1.69009	3	11.0407	10.87	3	2308.16	-4.12231	0
aTVIFEGER	1	1	1	W5Q268	N-Term(iTRAQ8plex)	0.941969	1		0.841011	1		1.02047	1		0.979631	1		0.962997	1		10.81	2	1325.73	-3.83661	0
vTEGGEPYR	1	2	1	W5Q302	N-Term(iTRAQ8plex)	0.934502	1		0.826354	1		1.03026	1		1.15897	1		1.55026	1		10.41	2	1311.68	-1.51448	0
tQGLVGTESLR	1	1	1	W5QC31	N-Term(iTRAQ8plex)	1.6784	1		1.05246	1		1.14448	1		1.34677	1		1.50595	1		10.28	2	1464.83	-2.54666	0
lTEEEkNHLNFLk	7	1	1	E7BQS5	N-Term(iTRAQ8plex); K6(iTRAQ8plex); K13(iTRAQ8plex)	1.4334	7	3.2879	1.46612	7	10.5007	1.68498	7	18.7962	1.89701	7	11.9434	1.52163	7	18.0364	10.27	4	2527.45	-5.8919	1
dSTLIMQLLR	2	16	2	H9CJU6;W5Q0Q1	N-Term(iTRAQ8plex)																10.26	2	1493.86	-2.91541	0
kNcELFEk	6	2	2	P14639;W5PWE9	N-Term(iTRAQ8plex); K1(iTRAQ8plex); C3(Carbamidomethyl); K8(iTRAQ8plex)																10.2	3	1980.13	-0.385211	1
dScmGTLVVk	1	1	1	W5NRI1	N-Term(iTRAQ8plex); C3(Carbamidomethyl); M4(Oxidation); K10(iTRAQ8plex)	1.01609	1		0.965813	1		1.0581	1		0.905622	1		0.891149	1		10.04	3	1733.94	-0.954743	0
eLSDQIQR	1	2	1	W5P2V0	N-Term(iTRAQ8plex)	0.86191	1		1.0954	1		0.880811	1		0.836573	1		0.942112	1		9.87	2	1292.71	-2.71686	0
yESELFLR	2	1	1	W5PMT0	N-Term(iTRAQ8plex)	1.03847	2	0.105784	0.923371	2	5.38865	0.845652	2	2.35286	1.18271	2	5.35081	0.780421	2	8.5227	9.73	2	1360.74	-4.34329	0
gQQDVEGYR	1	2	1	W5NUX8	N-Term(iTRAQ8plex)	1.33311	1		2.0286	1		1.92325	1		1.53876	1		1.26747	1		9.61	2	1355.69	0.183955	0
dTQSIIFLGk	2	3	3	W5Q0X5;W5Q124;W5PHI7	N-Term(iTRAQ8plex); K10(iTRAQ8plex)																9.49	3	1730.03	-2.05455	0
hPHPHLSFMAIPPkk	2	5	1	P02669	N-Term(iTRAQ8plex); K14(iTRAQ8plex); K15(iTRAQ8plex)	0.869145	2	6.6331	0.753274	2	0.892027	1.00135	2	1.95626	0.638275	2	29.2268	1.04797	2	7.82865	9.19	5	2649.55	-3.09163	1
lGENLQLk	1	3	1	W5QCD6	N-Term(iTRAQ8plex); K8(iTRAQ8plex)	0.698792	1		1.14258	1		0.744965	1		0.707843	1		0.699874	1		8.84	2	1522.94	-0.714509	0
yNGVFQEccQAEDk	1	2	2	P14639;W5PWE9	N-Term(iTRAQ8plex); C8(Carbamidomethyl); C9(Carbamidomethyl); K14(iTRAQ8plex)																8.74	3	2356.09	-10.7296	0
tVSYTEQk	1	2	1	W5PMM7	N-Term(iTRAQ8plex); K8(iTRAQ8plex)	0.563932	1		0.504989	1		0.332296	1		0.345749	1		0.292012	1		8.56	2	1563.88	0.309257	0
eQLSTSEENSkk	7	6	4	E7BQS5;P04654;E7BQS3;E7BQS2	N-Term(iTRAQ8plex); K11(iTRAQ8plex); K12(iTRAQ8plex)																8.41	3	2292.26	-7.01689	1
hkEMPFPk	2	2	1	P11839	N-Term(iTRAQ8plex); K2(iTRAQ8plex); K8(iTRAQ8plex)	0.321905	2	46.9534	0.294796	2	10.3648	0.265471	2	19.3054	0.262097	2	21.5772	0.215299	2	21.3418	8.11	4	1926.14	-0.274314	1
eLAEDGYSGVEVR	1	1	1	W5PPH6	N-Term(iTRAQ8plex)	0.68715	1		0.514486	1		0.349007	1		0.472143	1		0.355838	1		7.68	2	1727.86	-8.88865	0
aMVQQLDALR	1	1	1	W5NWM2	N-Term(iTRAQ8plex)	0.769913	1		0.858654	1		2.61349	1		1.15769	1		0.950068	1		7.56	2	1448.82	-1.67237	0
eIGSSGSk	1	1	1	W5Q5H8	N-Term(iTRAQ8plex); K8(iTRAQ8plex)	2.16955	1		2.47351	1		4.42519	1		1.82391	1		1.48941	1		7.33	2	1372.78	-6.75744	0
eVDPAHPALR	1	1	1	W5PE92	N-Term(iTRAQ8plex)	1.5384	1		1.79061	1		1.54791	1		1.66228	1		1.96894	1		7.23	3	1408.79	0.0770769	0
sLGVGFATR	3	1	1	W5NU39	N-Term(iTRAQ8plex)	1.04497	3	23.1447	1.1205	3	12.8225	1.18141	3	5.48111	1.11852	3	5.2275	1.24585	3	0.22498	7.02	2	1211.7	-2.2144	0
aALQEASTQAk	1	1	1	W5PCV9	N-Term(iTRAQ8plex); K11(iTRAQ8plex)	1.27514	1		1.11954	1		0.898084	1		1.21111	1		0.605913	1		6.7	3	1726	0.510881	0
aGGVFTPGAAFSR	1	1	1	W5P0V6	N-Term(iTRAQ8plex)	0.466792	1		0.464625	1		1.17742	1		0.702038	1		0.94197	1		6.46	2	1541.83	-3.01837	0
dVSEVVTPR	1	2	1	A5YBU9	N-Term(iTRAQ8plex)	1.91108	1		1.11161	1		1.51005	1		1.37899	1		1.39371	1		5.99	2	1305.73	-3.36276	0
dIIcQIAYAR	1	8	1	W5PDJ7	N-Term(iTRAQ8plex); C4(Carbamidomethyl)	0.633416	1		0.969799	1		0.638751	1		0.453367	1		1.10756	1		5.24	2	1526.83	0.301785	0
fHPDTDDAPVPAPAGDQk	1	1	1	W5PS94	N-Term(iTRAQ8plex); K18(iTRAQ8plex)	1.41897	1		1.29499	1		1.76408	1		2.04528	1		1.7138	1		4.45	4	2486.28	-0.298171	0
mDPAEEDTNVYTEk	1	1	1	W5P408	N-Term(iTRAQ8plex); K14(iTRAQ8plex)	2.02007	1		1.4759	1		1.78702	1		1.54944	1		1.30329	1		4.26	3	2250.1	-2.94126	0
lkEccDkPVLEk	1	2	2	P14639;W5PWE9	N-Term(iTRAQ8plex); K2(iTRAQ8plex); C4(Carbamidomethyl); C5(Carbamidomethyl); K7(iTRAQ8plex); K12(iTRAQ8plex)																3.2	4	2735.58	-1.75658	1
lENEIQTYR	3	1	1	W5Q160	N-Term(iTRAQ8plex)	1.85463	3	3.2689	1.32084	3	2.34432	1.79257	3	5.07535	1.77242	3	4.53084	2.25606	3	4.01829	2.76	2	1469.79	-3.0475	0
vELLGc	4	1	1	W5PNP1	N-Term(iTRAQ8plex); C6(Carbamidomethyl)	0.860412	4	18.6941	0.69009	4	17.6508	0.670692	4	15.9491	0.879852	4	27.2108	0.837602	4	24.1126	46.3	2	994.554	-0.914852	0
nmAIHPR	26	6	4	E7BQS5;P04654;E7BQS3;E7BQS2	N-Term(iTRAQ8plex); M2(Oxidation)																38.19	3	1158.63	-0.635681	0
iHPVQER	12	4	2	W5PMT0;W5Q4K3	N-Term(iTRAQ8plex)																37.57	3	1182.69	-0.258811	0
iIALDGDTk	2	1	1	W5Q5G8	N-Term(iTRAQ8plex); K9(iTRAQ8plex)	0.626077	2	0.6844	0.934114	2	1.34302	0.765592	2	9.88059	0.572775	2	20.4595	0.742194	2	2.67468	36.83	2	1553.94	1.053	0
sLcEmAEk	2	1	1	A6ZE99	N-Term(iTRAQ8plex); C3(Carbamidomethyl); M5(Oxidation); K8(iTRAQ8plex)	0.834248	2	0.817467	0.664768	2	6.89987	0.569329	2	28.9192	0.526103	2	13.3636	0.550751	2	13.4759	34.59	2	1591.83	2.31955	0
gAcLLPk	15	2	2	P14639;W5PWE9	N-Term(iTRAQ8plex); C3(Carbamidomethyl); K7(iTRAQ8plex)																34.2	3	1366.83	-0.738603	0
yLYEVAR	19	2	2	P14639;W5PWE9	N-Term(iTRAQ8plex)																29.05	3	1217.68	-3.13371	0
eDVPSER	25	5	3	D2DRB7;G3LUQ4;P04653	N-Term(iTRAQ8plex)																28.94	2	1135.59	-1.86625	0
iVLVDNk	3	1	1	W5PPQ8	N-Term(iTRAQ8plex); K7(iTRAQ8plex)	0.489539	3	35.5483	0.665381	3	23.4477	0.605033	3	2.9358	0.637486	3	4.96148	0.813909	3	0.870741	28.79	2	1408.9	-1.49299	0
iLIDALQk	2	2	1	W5NT95	N-Term(iTRAQ8plex); K8(iTRAQ8plex)	0.63582	2	8.60779	0.81675	2	28.0012	0.842276	2	27.0441	0.809757	2	50.6463	1.20636	2	29.3584	28.73	3	1521.98	-3.39213	0
lmELGHk	9	1	1	W5Q3I2	N-Term(iTRAQ8plex); M2(Oxidation); K7(iTRAQ8plex)	1.01349	9	10.5664	0.677346	9	21.4611	0.823123	9	38.9934	1.35043	9	21.385	1.42083	9	38.8009	28.4	3	1451.85	-0.92179	0
eLALcYGGmADR	2	1	1	W5PMT0	N-Term(iTRAQ8plex); C5(Carbamidomethyl); M9(Oxidation)	0.815354	2	56.1259	0.616701	2	94.2158	0.419424	2	37.4582	0.401232	2	45.3572	0.401479	2	52.4751	28.24	3	1675.81	2.03157	0
iDELEPR	2	2	1	W5Q302	N-Term(iTRAQ8plex)	0.781019	2	10.8029	0.745283	2	16.3667	0.740812	2	2.81461	0.745437	2	7.25916	0.890845	2	12.6046	27.97	2	1175.65	-2.99842	0
vLGVPLck	6	1	1	W5P1W2	N-Term(iTRAQ8plex); C7(Carbamidomethyl); K8(iTRAQ8plex)	1.06263	6	5.86179	1.1211	6	26.5881	1.10762	6	14.6292	1.02733	6	12.9197	0.806363	6	3.48783	26.98	3	1493.93	-3.30328	0
vHLPDSER	3	1	1	W5P408	N-Term(iTRAQ8plex)	1.70842	3	3.06814	2.07753	3	57.9947	1.56482	3	68.8526	1.33528	3	2.01036	1.45405	3	20.6578	26.86	3	1256.69	-1.46038	0
sMSAFQITTcTHR	1	1	1	W5PTZ8	N-Term(iTRAQ8plex); C10(Carbamidomethyl)	1.62235	1		1.7055	1		1.36363	1		1.02424	1		1.71701	1		26.77	3	1843.92	8.09111	0
aAQPVDSAk	2	1	1	W5P1C2	N-Term(iTRAQ8plex); K9(iTRAQ8plex)	1.169	2	33.6743	1.27784	2	18.2443	1.3393	2	50.3881	1.59244	2	73.2496	1.81004	2	65.8618	26.33	2	1494.88	1.839	0
iPAVFk	152	3	1	P67975	N-Term(iTRAQ8plex); K6(iTRAQ8plex)	1.11827	152	9.75195	1.04511	152	29.9825	1.65556	152	37.101	2.8921	152	27.045	3.02021	152	30.9215	26.32	3	1282.83	-3.00337	0
mQDLEAk	1	6	5	W5NXP3;W5Q0X5;W5Q124;W5PHI7;W5PHP7	N-Term(iTRAQ8plex); K7(iTRAQ8plex)																25.93	2	1442.8	-6.39488	0
vDLEDYk	3	1	1	W5Q5H8	N-Term(iTRAQ8plex); K7(iTRAQ8plex)	1.65452	3	11.9598	1.42581	3	6.95328	1.63477	3	9.01003	1.26077	3	17.0764	1.32084	3	0.00518896	25.45	2	1489.83	-5.22931	0
iEDSFSVk	1	2	1	P32262	N-Term(iTRAQ8plex); K8(iTRAQ8plex)	0.938265	1		1.0781	1		1.24636	1		1.0726	1		1.09336	1		25.01	3	1532.87	-3.42163	0
nGQPESEDk	3	1	1	W5PH95	N-Term(iTRAQ8plex); K9(iTRAQ8plex)	0.545569	3	14.8509	0.383638	3	4.62173	0.63553	3	1.08202	0.740729	3	13.3955	0.910196	3	58.0165	24.6	3	1611.84	-4.04078	0
dSQEEEk	1	2	1	F2YQ13	N-Term(iTRAQ8plex); K7(iTRAQ8plex)	0.885415	1		1.06193	1		2.03847	1		1.88561	1		1.77549	1		24.03	2	1472.77	0.218186	0
qEGVFAk	1	2	1	W5Q6U0	N-Term(iTRAQ8plex); K7(iTRAQ8plex)	0.784605	1		1.70644	1		1.28227	1		1.26955	1		1.55036	1		23.57	2	1386.81	-6.17983	0
lLNVGFk	3	2	1	F5CC79	N-Term(iTRAQ8plex); K7(iTRAQ8plex)	0.804356	3	0.640171	0.828182	3	36.3348	1.2367	3	6.8676	1.04046	3	50.058	1.24212	3	4.07981	23.46	3	1398.89	-1.84992	0
vAYSNDGR	4	2	1	W5PNP1	N-Term(iTRAQ8plex)	0.92231	4	8.37912	0.760301	4	4.50512	0.687368	4	14.4031	0.865907	4	9.9924	0.769792	4	16.2118	23.43	2	1185.62	-0.667202	0
nEQVEIR	2	2	1	W5P5T4	N-Term(iTRAQ8plex)	0.90177	2	11.0189	1.22903	2	4.70647	1.19456	2	6.68767	1.17299	2	9.04617	1.1234	2	0.323296	23.29	2	1191.66	-3.60339	0
gVLEQLR	16	1	1	W5PMT0	N-Term(iTRAQ8plex)	1.01121	16	17.3574	1.06267	16	16.7255	1.11294	16	11.5669	1.06492	16	24.8625	0.921328	16	27.9499	22.15	2	1118.68	-0.774584	0
aLPVSLADGR	1	1	1	W5P8R7	N-Term(iTRAQ8plex)	0.665885	1		0.767788	1		0.496443	1		0.462334	1		0.524544	1		21.65	2	1302.76	-3.0792	0
yDccQk	1	1	1	W5Q927	N-Term(iTRAQ8plex); C3(Carbamidomethyl); C4(Carbamidomethyl); K6(iTRAQ8plex)	0.522682	1		0.466674	1		0.557552	1		0.55855	1		0.430942	1		21.16	2	1481.73	-0.823243	0
nQLVDMk	1	1	1	W5Q5H8	N-Term(iTRAQ8plex); K7(iTRAQ8plex)	1.98734	1		2.92391	1		2.69027	1		1.80424	1		1.62846	1		20.76	2	1455.84	-5.50861	0
aNPTASk	2	2	1	W5Q5J5	N-Term(iTRAQ8plex); K7(iTRAQ8plex)	1	2	5.81443	0.786222	2	4.81195	0.714964	2	14.9494	0.530241	2	29.0916	0.551643	2	20.788	20.59	2	1296.76	-6.54341	0
sEQEELQDk	3	1	1	W5Q4T2	N-Term(iTRAQ8plex); K9(iTRAQ8plex)	1.13106	3	15.4848	1.16347	3	6.07619	1.98528	3	13.2476	1.79487	3	12.889	2.19116	3	14.3626	20.37	2	1713.91	-1.63503	0
tAAALLDQFYEk	1	1	1	W5NQQ0	N-Term(iTRAQ8plex); K12(iTRAQ8plex)	1.47937	1		1.58106	1		2.00224	1		2.7534	1		2.6676	1		20.15	2	1978.09	-8.48479	0
aTGNEcPk	2	2	1	W5QH23	N-Term(iTRAQ8plex); C6(Carbamidomethyl); K8(iTRAQ8plex)	0.870993	2	5.64899	0.882821	2	6.78118	1.29807	2	13.5459	1.59064	2	18.6864	1.92296	2	21.1785	20.14	2	1484.79	-5.92051	0
lIEELk	56	7	2	W5P6E0;W5NPT7	N-Term(iTRAQ8plex); K6(iTRAQ8plex)																20.02	2	1352.86	-1.57374	0
qEEGIVLk	1	1	1	W5PDM2	N-Term(iTRAQ8plex); K8(iTRAQ8plex)	1.30584	1		1.50581	1		7.1418	1		2.01385	1		2.64366	1		19.89	2	1523.92	-0.961712	0
amkPWTQPk	9	6	4	E7BQS5;P04654;E7BQS3;E7BQS2	N-Term(iTRAQ8plex); M2(Oxidation); K3(iTRAQ8plex); K9(iTRAQ8plex)																19.83	2	2015.18	-4.5882	0
hNTIPDk	1	2	1	W5PNP1	N-Term(iTRAQ8plex); K7(iTRAQ8plex)	0.918927	1		0.801048	1		1.0533	1		1.10177	1		0.890372	1		19.23	2	1432.83	-3.06822	0
gIVPLAk	1	2	1	W5PMM7	N-Term(iTRAQ8plex); K7(iTRAQ8plex)	0.393152	1		0.421513	1		0.352378	1		0.334936	1		0.371184	1		19.01	2	1305.87	0.230038	0
aTEAGLk	2	2	0		N-Term(iTRAQ8plex); K7(iTRAQ8plex)																18.31	2	1297.79	-0.0667826	0
qNTLPSk	3	3	1	Q9XSY9	N-Term(iTRAQ8plex); K7(iTRAQ8plex)	2.20429	3	26.1835	1.47261	3	0.883767	1.73752	3	78.8367	5.28596	3	107.205	3.47314	3	102.226	18.09	2	1395.84	-3.05439	0
eAAEMGk	1	10	1	W5PD15	N-Term(iTRAQ8plex); K7(iTRAQ8plex)	0.540751	1		0.888031	1		0.62877	1		0.493123	1		0.52468	1		17.98	2	1343.74	-4.55756	0
ecVPNSNER	1	3	1	W5PF65	N-Term(iTRAQ8plex); C2(Carbamidomethyl)	0.886171	1		1.1669	1		1.41364	1		0.852361	1		0.628047	1		17.84	2	1408.68	-1.91245	0
eAGQGAk	10	1	1	W5PJR5	N-Term(iTRAQ8plex); K7(iTRAQ8plex)	1.44401	10	10.8729	2.2855	10	14.7248	1.21331	10	19.7604	1.80763	10	34.7138	1.90272	10	41.7325	17.66	2	1268.73	-6.9451	0
aEFQGVLEk	2	2	1	W5NUX8	N-Term(iTRAQ8plex); K9(iTRAQ8plex)	0.751964	2	27.6573	1.03912	2	53.0021	1.00867	2	0.322551	0.934931	2	0.468306	0.91639	2	5.56437	17.64	3	1628.94	-3.22223	0
sMPEQTGEk	1	2	1	W5PMC5	N-Term(iTRAQ8plex); K9(iTRAQ8plex)	0.700951	1		1.10588	1		1.04454	1		0.988905	1		0.975354	1		17.54	3	1614.86	-3.34637	0
vSPVTVTALGGGDLELR	1	1	1	W5P559	N-Term(iTRAQ8plex)	1.5604	1		1.19244	1		1.13585	1		2.60139	1		1.53617	1		17.54	2	1988.13	-1.7439	0
dAcGPLQk	1	1	1	W5P7S6	N-Term(iTRAQ8plex); C3(Carbamidomethyl); K8(iTRAQ8plex)	1.77509	1		2.0394	1		2.12945	1		1.28291	1		1.56312	1		17.49	2	1496.83	-3.43502	0
aPNHAVVSR	3	1	1	W5PF65	N-Term(iTRAQ8plex)	1.34229	3	28.347	1.27335	3	5.04586	1.44777	3	8.56735	1.2832	3	0.481152	0.87433	3	21.4551	17.27	2	1254.72	-0.833999	0
vVLVLAGR	1	1	1	W5PHP6	N-Term(iTRAQ8plex)	0.479524	1		0.974427	1		0.539059	1		0.397221	1		0.458927	1		17.23	2	1130.75	-1.97689	0
nTEISFk	2	5	1	W5NU39	N-Term(iTRAQ8plex); K7(iTRAQ8plex)	1.36436	2	17.3479	2.15329	2	12.7251	1.66347	2	7.28889	1.62913	2	3.24389	1.59916	2	11.6776	16.72	2	1446.83	-5.41851	0
sEGVAIDPAR	1	1	1	W5PSD8	N-Term(iTRAQ8plex)	1.07978	1		1.09869	1		1.53225	1		1.79049	1		1.88924	1		16.39	2	1318.73	-1.12374	0
gNQQSPR	2	2	1	W5QDG7	N-Term(iTRAQ8plex)	0.69325	2	22.2117	0.867107	2	11.1357	0.730046	2	15.2339	0.954066	2	11.7576	0.608732	2	33.498	16.22	2	1090.59	-1.28399	0
vAIIIPFR	2	2	1	F5CC79	N-Term(iTRAQ8plex)	0.866069	2	11.9131	0.754615	2	26.3356	0.970278	2	18.9367	0.813166	2	19.961	0.853991	2	17.0078	16	2	1232.8	-1.97311	0
sDFSDEER	1	2	1	W5QH23	N-Term(iTRAQ8plex)	0.756631	1		0.764886	1		0.850166	1		0.934158	1		1.07202	1		15.43	2	1288.59	-2.20095	0
mVQVASR	2	2	1	W5PMT0	N-Term(iTRAQ8plex)	1.0635	2	6.29694	0.89534	2	12.639	0.852089	2	20.7759	0.863064	2	39.8501	0.882374	2	38.7497	15.33	2	1094.63	-2.29544	0
dYFMPcPNR	2	1	1	W5QAB1	N-Term(iTRAQ8plex); C6(Carbamidomethyl)	0.935952	2	1.70274	0.762453	2	2.38688	1.01714	2	5.5601	0.675392	2	4.54199	0.640607	2	3.40892	15.28	2	1503.7	-0.698021	0
eNAALVAR	1	1	1	W5PRG8	N-Term(iTRAQ8plex)	1.55823	1		1.36283	1		1.19091	1		1.13456	1		1.19182	1		14.7	2	1147.67	-3.78347	0
dPLTITVR	2	1	1	W5NRI1	N-Term(iTRAQ8plex)	0.697599	2	2.98898	0.700528	2	21.5592	0.74728	2	27.5556	0.812154	2	19.7884	0.741645	2	40.9773	14.26	2	1218.74	-0.0606017	0
fDPVEGk	4	1	1	W5QAB1	N-Term(iTRAQ8plex); K7(iTRAQ8plex)	1.02549	4	9.52588	1.2216	4	9.50793	1.47107	4	3.15665	0.773459	4	4.25676	0.649725	4	9.39308	13.95	2	1399.8	-4.82243	0
vMPIcLPSk	1	1	1	W5P0Q4	N-Term(iTRAQ8plex); C5(Carbamidomethyl); K9(iTRAQ8plex)	2.6425	1		1.68904	1		1.73113	1		1.30812	1		1.23539	1		13.45	3	1652.96	-5.63141	0
iccEkDER	5	1	1	P02669	N-Term(iTRAQ8plex); C2(Carbamidomethyl); C3(Carbamidomethyl); K5(iTRAQ8plex)	1.09665	5	14.3433	1.02271	5	8.06295	1.40574	5	6.88475	1.20115	5	10.2079	1.62198	5	13.9258	13.25	2	1717.88	-1.23805	1
vYQWEDPDPk	1	1	1	W5Q6U0	N-Term(iTRAQ8plex); K10(iTRAQ8plex)	1.83035	1		2.26124	1		2.19511	1		0.838743	1		0.801803	1		13.06	2	1884.99	-1.19034	0
aVDPTVSk	2	1	1	W5PZJ1	N-Term(iTRAQ8plex); K8(iTRAQ8plex)	1.06718	2	0.873375	1.83474	2	61.2238	1.50093	2	19.7648	3.01755	2	10.9872	3.94764	2	5.98269	12.95	3	1424.85	-5.23626	0
eVVDPTk	4	2	1	P29701	N-Term(iTRAQ8plex); K7(iTRAQ8plex)	0.692724	4	2.23232	0.842047	4	16.1891	1.16584	4	9.22707	0.813822	4	8.62827	1.05937	4	30.857	12.68	2	1395.83	-0.438296	0
ccAADDk	3	2	2	P14639;W5PWE9	N-Term(iTRAQ8plex); C1(Carbamidomethyl); C2(Carbamidomethyl); K7(iTRAQ8plex)																12.46	2	1447.71	-3.23252	0
tPIVGQPSVPGGPVHLcPGR	1	2	1	P29701	N-Term(iTRAQ8plex); C17(Carbamidomethyl)	1.07363	1		1.19965	1		1.23148	1		1.3064	1		1.33285	1		12.35	4	2329.28	0.831625	0
fAAATGATPIAGR	1	3	1	A6YRY8	N-Term(iTRAQ8plex)	1.33538	1		1.3908	1		0.878397	1		0.685865	1		0.76045	1		12.08	2	1507.85	-3.91255	0
vLDELTLAR	1	6	1	W5Q6L8	N-Term(iTRAQ8plex)	1.00906	1		1.3341	1		0.891844	1		0.896684	1		1.26632	1		11.89	2	1333.79	-3.33927	0
dSLFNYQk	1	1	1	W5Q5H8	N-Term(iTRAQ8plex); K8(iTRAQ8plex)	1.61782	1		2.55493	1		2.2627	1		2.31771	1		1.79447	1		11.44	3	1622.9	0.102429	0
eLQAAQAR	1	2	1	Q7M2U8	N-Term(iTRAQ8plex)	0.934255	1		0.645228	1		0.542272	1		0.555669	1		0.446992	1		11.42	2	1190.67	-6.88608	0
aAAALEAk	1	3	1	W5NQG4	N-Term(iTRAQ8plex); K8(iTRAQ8plex)	0.919273	1		1.28317	1		1.24251	1		1.00123	1		1.21549	1		11.18	2	1352.83	-3.74417	0
eGTQATYk	1	2	1	D6PZY4	N-Term(iTRAQ8plex); K8(iTRAQ8plex)	1.02673	1		1.01673	1		1.2876	1		1.09765	1		0.807402	1		10.9	2	1505.84	-4.6305	0
dLDLQSNHPmPETk	2	1	1	W5PNC9	N-Term(iTRAQ8plex); M10(Oxidation); K14(iTRAQ8plex)	1.73202	2	43.4237	1.5417	2	30.7102	2.64031	2	14.9501	3.34031	2	61.9959	3.22714	2	69.4163	10.8	3	2249.16	-4.57353	0
eLSSFIQk	1	2	1	W5PTG9	N-Term(iTRAQ8plex); K8(iTRAQ8plex)	0.807995	1		0.927006	1		1.40859	1		1.58777	1		1.82916	1		10.43	2	1559.92	-2.34168	0
ecEEIIR	3	2	1	W5NQ46	N-Term(iTRAQ8plex); C2(Carbamidomethyl)	1.67681	3	20.1499	2.00206	3	5.43777	2.15315	3	5.75809	1.20179	3	13.3406	1.144	3	2.39185	10.32	2	1252.65	-3.9865	0
aVVGVVAGGGR	1	1	1	W5PSW9	N-Term(iTRAQ8plex)	0.936809	1		0.843288	1		0.555455	1		0.459082	1		0.594115	1		9.57	2	1245.76	-2.07146	0
lPLQDVYk	3	8	1	W5PD15	N-Term(iTRAQ8plex); K8(iTRAQ8plex)	0.73848	3	2.12326	1.2778	3	25.0342	0.569641	3	6.83609	0.418387	3	21.0317	0.544155	3	2.27757	9.24	3	1583.96	-0.69816	0
eIAEAYLGk	1	1	1	W5NPN4	N-Term(iTRAQ8plex); K9(iTRAQ8plex)	1.49378	1		0.873456	1		0.944973	1		1.2032	1		1.3665	1		9.21	3	1601.94	-0.352332	0
tDASDVkPc	1	1	1	W5Q268	N-Term(iTRAQ8plex); K7(iTRAQ8plex); C9(Carbamidomethyl)	1.18049	1		0.912936	1		1.25441	1		1.09756	1		0.842323	1		8.85	2	1600.84	-1.21279	0
lPELVDFR	1	1	1	W5PCL4	N-Term(iTRAQ8plex)	0.941242	1		0.743635	1		0.848743	1		1.6408	1		1.48728	1		7.5	2	1292.75	-1.68946	0
sNDAYQSR	2	2	1	K4P494	N-Term(iTRAQ8plex)	0.651899	2	27.3367	0.862457	2	21.8421	0.982258	2	23.8752	0.995525	2	36.7407	1.22289	2	25.7303	7.33	2	1244.62	-0.919829	0
kNVHNANQk	1	1	1	A6ZE99	N-Term(iTRAQ8plex); K1(iTRAQ8plex); K9(iTRAQ8plex)	0.784867	1		1.18905	1		1.0972	1		0.896165	1		0.821083	1		7.15	4	1965.17	-4.34891	1
vFcTSSLk	1	1	1	W5P0W4	N-Term(iTRAQ8plex); C3(Carbamidomethyl); K8(iTRAQ8plex)	0.958749	1		0.976094	1		1.36939	1		1.53865	1		1.89937	1		6.93	2	1549.89	-0.517053	0
eVEISIPASFFPR	1	1	1	W5NPT7	N-Term(iTRAQ8plex)	1.36841	1		1.00189	1		1.04142	1		1.58757	1		2.2656	1		6.92	2	1795.99	-0.322958	0
vkETmVPk	16	2	1	P11839	N-Term(iTRAQ8plex); K2(iTRAQ8plex); M5(Oxidation); K8(iTRAQ8plex)	0.937636	16	20.5505	0.985991	16	10.1971	1.69149	16	20.3957	1.17261	16	18.3149	1.92675	16	15.7223	6.75	4	1860.14	-0.517166	1
tITMLDEQGEQLk	1	1	1	W5QH64	N-Term(iTRAQ8plex); K13(iTRAQ8plex)	0.985687	1		0.946061	1		1.13981	1		1.09912	1		0.999361	1		6.26	3	2114.16	-2.73961	0
gQVcVVTGASR	1	1	1	W5QCV4	N-Term(iTRAQ8plex); C4(Carbamidomethyl)	0.825612	1		0.905356	1		0.932413	1		1.06706	1		0.980836	1		6.07	2	1437.78	1.71664	0
tPGPGAQSALR	1	2	1	W5P3D6	N-Term(iTRAQ8plex)	0.753672	1		1.0351	1		0.556741	1		0.418728	1		0.478588	1		5.69	2	1358.76	-8.40409	0
hkEmPFPk	2	2	1	P11839	N-Term(iTRAQ8plex); K2(iTRAQ8plex); M4(Oxidation); K8(iTRAQ8plex)	1.09356	2	14.734	0.839043	2	0.704396	0.953488	2	41.2988	0.921274	2	21.401	1.2023	2	40.7569	4.56	4	1942.12	-5.51054	1
tVFDEAIR	1	3	1	W5NVC9	N-Term(iTRAQ8plex)	1.14455	1		0.65401	1		0.624146	1		0.547712	1		0.528881	1		4.32	2	1254.69	-6.28307	0
tSALEcIR	1	4	1	D3G9G3	N-Term(iTRAQ8plex); C6(Carbamidomethyl)	1.10329	1		1.6509	1		0.877228	1		0.860617	1		1.10134	1		4.29	2	1253.68	-3.11789	0
dSALGFVR	1	4	1	D3G9G3	N-Term(iTRAQ8plex)	0.872583	1		2.12566	1		2.05568	1		0.854737	1		0.841291	1		4.25	2	1168.66	-4.10275	0
eNINNPSk	1	1	1	W5PYA9	N-Term(iTRAQ8plex); K8(iTRAQ8plex)	1.48179	1		1.81752	1		0.748337	1		1.03633	1		0.622871	1		2.88	2	1523.86	-0.704002	0
dYAGVFTDAGLTFk	1	1	1	W5NRI1	N-Term(iTRAQ8plex); K14(iTRAQ8plex)	1.2516	1		0.944074	1		1.2046	1		1.29145	1		1.62026	1		1.72	3	2113.14	-1.24627	0
gPFPIL	6	1	1	R4R2H5	N-Term(iTRAQ8plex)	0.615668	6	9.99239	0.475006	6	26.0134	0.305989	6	31.141	0.48644	6	31.0473	0.451759	6	38.0426	41.03	2	947.586	-0.765277	0
iTMPLW	16	5	2	D2DRB7;P04653	N-Term(iTRAQ8plex)																38	2	1064.61	-2.51452	0
gSDPVLk	1	1	1	W5PZU1	N-Term(iTRAQ8plex); K7(iTRAQ8plex)	0.881128	1		0.741628	1		1.13813	1		1.39263	1		1.42003	1		27.97	2	1323.8	-6.17035	0
vAQQGIk	1	1	1	W5Q6U0	N-Term(iTRAQ8plex); K7(iTRAQ8plex)	0.654403	1		1.4252	1		1.12396	1		0.898815	1		0.894573	1		27.05	2	1351.84	-9.51039	0
aLcSEk	16	2	2	W5QD52;P09462	N-Term(iTRAQ8plex); C3(Carbamidomethyl); K6(iTRAQ8plex)																26.93	2	1315.75	-0.246181	0
sDNSGENR	1	2	1	W5QH23	N-Term(iTRAQ8plex)	1.01933	1		0.777123	1		0.926169	1		1.3652	1		1.54627	1		25.96	2	1182.56	-1.98509	0
dHSPDVLSAQVR	1	1	1	W5NRG7	N-Term(iTRAQ8plex)	0.907471	1		4.08775	1		0.585841	1		0.604128	1		0.683924	1		25.46	3	1627.88	4.84116	0
iIGGSLDAk	1	1	1	W5P0Q4	N-Term(iTRAQ8plex); K9(iTRAQ8plex)	1.95003	1		2.6304	1		1.61014	1		1.07798	1		1.1795	1		25.32	2	1481.91	-2.75939	0
mLDTSTLLk	1	2	1	W5PZI1	N-Term(iTRAQ8plex); M1(Oxidation); K9(iTRAQ8plex)	1.14106	1		3.27765	1		1.20469	1		1.06577	1		0.870753	1		25.2	2	1645.96	-1.70248	0
aQHTDNk	3	3	1	W5PMT0	N-Term(iTRAQ8plex); K7(iTRAQ8plex)	0.898319	3	0.866824	0.61947	3	1.45368	0.649839	3	5.80669	0.766967	3	7.10528	0.837745	3	2.40009	25.12	3	1421.79	-5.26777	0
nYQEAk	10	2	2	P14639;W5PWE9	N-Term(iTRAQ8plex); K6(iTRAQ8plex)																24.78	2	1360.76	-2.8466	0
lMNVFLk	3	1	1	W5NXP6	N-Term(iTRAQ8plex); K7(iTRAQ8plex)	1.06011	3	3.68947	1.11151	3	10.9724	1.14111	3	4.96532	1.15554	3	2.51361	1.29674	3	30.9311	24.59	3	1472.91	-1.02298	0
mYTSNYELk	1	1	1	W5PMH6	N-Term(iTRAQ8plex); M1(Oxidation); K9(iTRAQ8plex)	1.22053	1		1.66346	1		2.40274	1		3.53284	1		2.31376	1		24.54	2	1772.92	-6.83572	0
qYGFck	3	2	1	P29701	N-Term(iTRAQ8plex); C5(Carbamidomethyl); K6(iTRAQ8plex)	0.701544	3	0.694812	0.892616	3	1.55151	1.4343	3	2.07994	0.96747	3	4.44293	0.882372	3	9.25597	24.15	3	1410.76	-0.764895	0
lQQLEDk	2	3	2	I1WXR3;W5PZS7	N-Term(iTRAQ8plex); K7(iTRAQ8plex)																23.92	3	1481.87	-4.7506	0
eDIISk	22	2	1	W5Q3I2	N-Term(iTRAQ8plex); K6(iTRAQ8plex)	1.6735	11	22.0261	1.33922	11	13.7242	1.61041	11	15.7115	3.17714	11	17.1189	4.14513	11	16.0784	23.35	2	1312.78	-7.52486	0
aAHGVk	6	1	1	W5PMT0	N-Term(iTRAQ8plex); K6(iTRAQ8plex)	0.866967	6	7.80303	0.673937	6	11.3387	0.615287	6	6.62533	0.661043	6	7.83375	0.647704	6	11.5346	22.82	2	1190.74	-2.10385	0
dLTDYLMk	3	12	1	P60713	N-Term(iTRAQ8plex); K8(iTRAQ8plex)	0.733614	3	11.1326	1.36107	3	3.08971	0.967961	3	28.9539	0.74177	3	10.7645	0.983036	3	23.5564	22.81	3	1606.89	-4.63613	0
lPENVVVk	1	1	1	Q7M371	N-Term(iTRAQ8plex); K8(iTRAQ8plex)	1.08881	1		1.73274	1		2.47624	1		1.43856	1		1.55352	1		22.58	3	1505.95	2.07643	0
fVPPGSTk	3	1	1	W5P0U4	N-Term(iTRAQ8plex); K8(iTRAQ8plex)	1.26261	3	6.33012	1.35091	3	7.92875	1.60723	3	9.76665	1.74352	3	14.6984	1.7762	3	0.716767	22.15	2	1440.86	-4.0515	0
dFMIQGGDFTR	1	3	1	Q5TIK9	N-Term(iTRAQ8plex)	1.0613	1		0.674757	1		0.64956	1		0.824198	1		0.740708	1		21.64	2	1590.79	1.32629	0
tQSFVAk	2	1	1	W5PMT0	N-Term(iTRAQ8plex); K7(iTRAQ8plex)	0.895716	2	3.95051	1.0059	2	0.0466627	0.920625	2	2.05425	1.0777	2	1.34197	0.862517	2	5.72612	21.53	2	1388.83	-3.54482	0
sANSPDGk	1	2	1	W5PN88	N-Term(iTRAQ8plex); K8(iTRAQ8plex)	0.543714	1		1.09153	1		0.850627	1		0.569912	1		0.671976	1		21.26	2	1383.76	-3.25306	0
lVHVQk	3	4	1	W5NU39	N-Term(iTRAQ8plex); K6(iTRAQ8plex)	1.40665	3	21.8237	2.08428	3	9.32512	2.15652	3	7.81516	1.97347	3	14.58	2.31268	3	0.941211	21.23	2	1331.86	-2.7085	0
rEDDIAk	3	1	1	W5PMT0	N-Term(iTRAQ8plex); K7(iTRAQ8plex)	0.828108	3	8.02681	0.999501	3	19.3407	0.716686	3	0.700851	0.770544	3	1.57037	0.741567	3	7.43201	20.79	3	1454.84	-3.47626	1
sTVELFk	2	1	1	W5NY46	N-Term(iTRAQ8plex); K7(iTRAQ8plex)	1.06112	2	6.79814	1.34627	2	2.80621	1.20755	2	24.6828	0.800659	2	11.5492	0.891137	2	1.80159	20.75	3	1431.86	-1.50444	0
aLYASk	6	4	2	P00349;W5PMT0	N-Term(iTRAQ8plex); K6(iTRAQ8plex)																20.56	2	1260.77	-2.8428	0
qVTESAPDSSTAPL	1	1	1	W5PJA0	N-Term(iTRAQ8plex)	1.26292	1		1.38765	1		1.08275	1		0.875585	1		2.09159	1		20.37	2	1706.86	-6.65328	0
aHVETLR	7	1	1	W5NX51	N-Term(iTRAQ8plex)	1.29177	7	7.58379	1.22485	7	10.6791	1.60778	7	11.9759	1.74819	7	21.8027	1.79783	7	21.8704	20.34	3	1129.66	0.566238	0
iLEPTLk	7	2	1	W5PTG9	N-Term(iTRAQ8plex); K7(iTRAQ8plex)	0.825321	7	25.1229	0.869524	7	22.2322	1.23866	7	4.67333	0.924569	7	35.2184	0.905508	7	32.4421	20.27	2	1421.91	-4.32238	0
eGmNIVEAMER	2	3	1	Q864L8	N-Term(iTRAQ8plex); M3(Oxidation)	1.17306	2	3.88947	0.819254	2	52.6333	0.777225	2	44.434	0.561464	2	73.3198	0.560761	2	66.9748	20.23	2	1598.78	-1.61358	0
tAVQAAk	1	2	1	W5P3T2	N-Term(iTRAQ8plex); K7(iTRAQ8plex)	0.71789	1		0.4207	1		0.56086	1		0.690855	1		0.755613	1		19.94	2	1296.81	1.07139	0
lTEEEk	28	6	4	E7BQS5;P04654;E7BQS3;E7BQS2	N-Term(iTRAQ8plex); K6(iTRAQ8plex)																19.68	2	1356.78	-3.0241	0
lVPIIcR	2	2	1	W5PNP1	N-Term(iTRAQ8plex); C6(Carbamidomethyl)	0.972269	2	7.06736	0.634105	2	16.0479	0.656704	2	8.8874	0.695905	2	1.45006	0.699998	2	7.49831	19.23	3	1174.73	-0.838655	0
eQLSAPVAGTPR	4	1	1	W5QDQ1	N-Term(iTRAQ8plex)	2.0316	4	15.9305	1.53123	4	12.4074	2.13948	4	27.636	2.48921	4	39.6457	2.74406	4	39.6769	18.9	2	1529.86	-2.24528	0
iTVYDk	50	1	1	E7BQS2	N-Term(iTRAQ8plex); K6(iTRAQ8plex)	1.91348	50	15.9461	1.74278	50	23.5187	2.50324	50	22.8223	4.95899	50	24.2862	2.7778	50	18.5192	18.55	2	1346.81	-1.96346	0
lLcGLLTER	1	2	1	Q30DR4	N-Term(iTRAQ8plex); C3(Carbamidomethyl)	0.901266	1		1.46009	1		1.0785	1		0.845179	1		1.02774	1		18.49	2	1378.8	-1.84411	0
vGTQFIR	1	2	1	Q009B1	N-Term(iTRAQ8plex)	1.49106	1		1.66596	1		1.40961	1		1.06273	1		1.21584	1		18.25	2	1124.67	-2.55164	0
lMNQNk	1	2	1	Q9MZY2	N-Term(iTRAQ8plex); K6(iTRAQ8plex)	2.31038	1		3.11784	1		6.10974	1		3.56245	1		3.31324	1		18.13	2	1355.79	-1.3603	0
aTEQLk	2	1	1	W5NX51	N-Term(iTRAQ8plex); K6(iTRAQ8plex)	1.25967	2	10.6479	1.24531	2	8.32748	1.93101	2	6.51919	1.23085	2	3.4344	1.42576	2	2.96565	18.11	2	1297.78	-7.01956	0
tTQASk	12	1	1	W5PSQ7	N-Term(iTRAQ8plex); K6(iTRAQ8plex)	0.241164	12	19.7031	0.202232	12	31.0663	0.315618	12	57.8969	0.202519	12	39.0781	0.236321	12	35.4053	18.06	2	1243.74	-2.25069	0
iQSTPVk	1	1	1	W5QFH5	N-Term(iTRAQ8plex); K7(iTRAQ8plex)	1.19932	1		2.60415	1		2.12131	1		1.7439	1		1.80551	1		17.54	2	1380.86	-3.42468	0
lmLIHEk	1	1	1	W5PAY2	N-Term(iTRAQ8plex); M2(Oxidation); K7(iTRAQ8plex)	0.917926	1		1.01486	1		1.87995	1		1.23492	1		1.37269	1		17.43	4	1507.89	-15.575	0
lPDVQLPTNk	2	2	1	W5PTG9	N-Term(iTRAQ8plex); K10(iTRAQ8plex)	0.830093	2	84.2623	0.716784	2	54.3817	0.811698	2	48.045	0.646395	2	54.8417	0.795587	2	61.3997	17.06	3	1733.03	-4.21995	0
iIVPLNSR	1	1	1	W5PPQ8	N-Term(iTRAQ8plex)	0.511631	1		0.38589	1		0.301694	1		0.389077	1		0.414072	1		16.75	2	1215.77	0.359926	0
hTVQTENR	3	1	1	W5NZY6	N-Term(iTRAQ8plex)	1.18768	3	46.7292	0.897262	3	174.047	0.977504	3	60.0564	1.20256	3	3.98633	1.48079	3	29.9407	16.69	3	1288.69	-3.82554	0
gDSVSHR	3	1	1	W5Q5H8	N-Term(iTRAQ8plex)	1.13225	3	139.781	1.45424	3	62.0688	1.52802	3	94.119	0.764073	3	89.2649	0.865338	3	28.3459	16.65	2	1061.56	-3.6767	0
kLLAEk	84	9	1	P67975	N-Term(iTRAQ8plex); K1(iTRAQ8plex); K6(iTRAQ8plex)	0.621048	28	14.6251	0.566673	28	18.9678	0.731874	28	14.8036	0.820559	28	13.1071	1.09191	28	13.6666	16.63	4	1614.07	-3.2045	1
nPEPELLVR	1	2	1	W5Q302	N-Term(iTRAQ8plex)	1.24785	1		0.898242	1		1.63677	1		1.58496	1		1.89623	1		16.53	2	1370.79	-0.6745	0
aVLYNYR	3	1	1	W5NPK5	N-Term(iTRAQ8plex)	0.77417	3	16.5683	0.915683	3	5.12275	0.946046	3	8.23789	0.888062	3	12.9951	0.930825	3	6.39516	16.2	2	1202.68	0.826934	0
aSGIPDR	2	2	1	W5PSQ7	N-Term(iTRAQ8plex)	0.268112	2	17.6741	0.198337	2	25.1917	0.296693	2	44.3427	0.234616	2	47.8096	0.288377	2	37.4804	16.03	2	1019.58	-1.86496	0
eVDIGIPDATGR	1	1	1	W5PRJ4	N-Term(iTRAQ8plex)	0.603518	1		0.750231	1		0.589569	1		0.542025	1		0.50098	1		15.95	2	1546.84	0.345999	0
gNAEQSR	1	2	1	P32262	N-Term(iTRAQ8plex)	1.30087	1		1.27511	1		1.82523	1		1.32698	1		1.20429	1		15.84	2	1065.56	-1.30121	0
tPcTVTcNIPVVSGk	1	2	1	W5NQ46	N-Term(iTRAQ8plex); C3(Carbamidomethyl); C7(Carbamidomethyl); K15(iTRAQ8plex)	1.76615	1		2.18255	1		2.67366	1		2.37159	1		1.9477	1		15.64	2	2241.22	-1.04177	0
lLDSLPEDTR	1	2	1	W5PJZ2	N-Term(iTRAQ8plex)	0.851028	1		1.07483	1		2.28318	1		1.44007	1		0.938913	1		15.36	2	1462.8	-0.947873	0
vTAPGATR	1	3	1	Q8HY29	N-Term(iTRAQ8plex)	0.656074	1		0.887251	1		0.986771	1		0.941045	1		1.42754	1		15.04	2	1076.63	-2.32251	0
eAFTSGR	5	1	1	W5NPT7	N-Term(iTRAQ8plex)	1.02803	5	14.1924	0.981723	5	11.7508	0.813571	5	20.6604	0.984027	5	23.1831	0.927086	5	38.8376	14.89	2	1071.57	-3.51772	0
mVQVASR	2	2	1	W5PMT0	N-Term(iTRAQ8plex); M1(Oxidation)	0.93476	2	15.0571	0.803964	2	16.6139	0.681319	2	5.23867	0.694129	2	3.48627	0.632272	2	2.11397	14.68	2	1110.62	0.00799269	0
aDIEEIk	1	1	1	W5P1C2	N-Term(iTRAQ8plex); K7(iTRAQ8plex)	1.36096	1		1.15217	1		1.41585	1		1.77949	1		1.85522	1		14.12	2	1425.83	-5.95879	0
qQLEEVR	1	2	1	Q7M2U8	N-Term(iTRAQ8plex)	0.633479	1		0.569377	1		0.598369	1		0.779728	1		0.767028	1		14.11	2	1205.68	-1.55731	0
eIQTAVR	1	19	1	W5PUF2	N-Term(iTRAQ8plex)	1.20875	1		1.2651	1		0.710808	1		0.463496	1		0.919898	1		13.96	2	1120.66	-2.63565	0
lLIYYATR	1	1	1	W5QHZ8	N-Term(iTRAQ8plex)	0.210606	1		0.204415	1		0.104285	1		0.120884	1		0.0787854	1		13.61	2	1316.79	-0.433013	0
sLPcDIck	1	1	1	W5PAJ2	N-Term(iTRAQ8plex); C4(Carbamidomethyl); C7(Carbamidomethyl); K8(iTRAQ8plex)	0.936996	1		0.689783	1		1.20155	1		0.892014	1		1.08906	1		13.42	2	1600.86	-4.38245	0
vLPVILPPMPQR	2	3	1	Q49JI4	N-Term(iTRAQ8plex)	1.62368	2	1.90083	1.60032	2	11.8313	1.16175	2	54.1955	1.52478	2	51.3911	1.48832	2	59.1596	13.22	3	1664.01	-6.08796	0
aQDFQGR	3	1	1	W5P9V5	N-Term(iTRAQ8plex)	0.708002	3	26.0156	0.781576	3	0.877496	1.03936	3	4.92029	1.25797	3	42.3806	1.15689	3	19.1897	13.1	2	1125.59	-3.08705	0
gLcLScR	4	3	1	Q29524	N-Term(iTRAQ8plex); C3(Carbamidomethyl); C6(Carbamidomethyl)	1.47903	2	7.21967	0.848441	2	11.2335	1.19265	2	4.16876	1.65241	2	4.0269	1.56536	2	3.39208	13.07	2	1169.6	-3.79488	0
cTATDVk	2	1	1	W5PZD0	N-Term(iTRAQ8plex); C1(Carbamidomethyl); K7(iTRAQ8plex)	1.14648	2	16.7839	1.17232	2	4.06709	1.26372	2	20.4652	2.09402	2	13.5763	2.32382	2	2.98397	13	2	1402.78	-4.35479	0
gLFIIDDk	1	2	1	W5NUE3	N-Term(iTRAQ8plex); K8(iTRAQ8plex)	0.56983	1		2.2726	1		0.581717	1		0.457463	1		0.557528	1		12.62	3	1528.91	-4.29311	0
vEIIANDQGNR	1	8	3	W5PG95;W5NPN4;W5PTR5	N-Term(iTRAQ8plex)																12.42	2	1532.83	-4.24667	0
sEITELR	1	1	1	W5Q160	N-Term(iTRAQ8plex)	1.96693	1		1.18131	1		1.47524	1		1.60005	1		2.09563	1		12.4	2	1151.66	-0.296338	0
aYQAIQR	1	1	1	W5Q6U0	N-Term(iTRAQ8plex)	1.18043	1		1.54926	1		0.922595	1		0.773889	1		1.00801	1		12.19	2	1153.66	-4.21319	0
yQLSVSk	1	2	1	W5NQ46	N-Term(iTRAQ8plex); K7(iTRAQ8plex)	0.647755	1		0.639304	1		0.722676	1		0.543107	1		0.482971	1		12.15	2	1432.86	-2.72286	0
nTTIPTk	1	4	1	W5NPN4	N-Term(iTRAQ8plex); K7(iTRAQ8plex)	0.739095	1		0.805181	1		0.636402	1		0.514897	1		0.622734	1		12.05	2	1382.85	1.86807	0
aTVEDEk	1	2	1	W5NPN4	N-Term(iTRAQ8plex); K7(iTRAQ8plex)	0.77735	1		0.906244	1		1.03381	1		0.967722	1		0.915597	1		11.97	2	1399.78	-8.13549	0
sSQYYAR	5	1	1	W5PMT0	N-Term(iTRAQ8plex)	0.881093	5	8.85297	0.826446	5	24.2436	0.815033	5	8.66162	0.879241	5	32.266	0.758784	5	47.3912	11.71	2	1178.6	-9.38769	0
nEPNPQR	2	2	1	F5CC79	N-Term(iTRAQ8plex)	1.1483	2	0.38663	0.980714	2	8.47519	1.22968	2	4.61936e-05	1.26369	2	3.24386	1.26	2	9.08001	11.43	2	1158.61	-4.13698	0
lIGDAAk	1	8	3	W5PG95;W5NPN4;W5PTR5	N-Term(iTRAQ8plex); K7(iTRAQ8plex)																11.09	2	1295.81	-3.3548	0
gAMTGAk	3	1	1	A6ZE99	N-Term(iTRAQ8plex); K7(iTRAQ8plex)	0.80153	3	3.9789	0.59148	3	5.12833	0.671498	3	3.74713	0.719076	3	7.74697	0.743809	3	4.43223	10.81	2	1243.72	-3.99345	0
tkLTEEEk	7	6	4	E7BQS5;P04654;E7BQS3;E7BQS2	N-Term(iTRAQ8plex); K2(iTRAQ8plex); K8(iTRAQ8plex)																10.66	4	1890.13	-2.24299	1
vPGTSASATLTGLTR	1	2	1	W5QDG7	N-Term(iTRAQ8plex)	1.01703	1		0.935639	1		1.03114	1		1.22609	1		0.884198	1		10.56	2	1735.98	-2.93491	0
qAVEEPR	3	1	1	W5PWM0	N-Term(iTRAQ8plex)	0.994221	3	10.3357	0.610766	3	14.1751	0.604044	3	51.8663	0.58652	3	17.5783	0.613224	3	3.78462	9.82	2	1132.62	-5.5151	0
lTEEEkNR	4	5	3	P04654;E7BQS3;E7BQS2	N-Term(iTRAQ8plex); K6(iTRAQ8plex)																9.7	2	1626.93	-0.125278	1
tcRPEEEcR	1	1	1	W5PSD8	N-Term(iTRAQ8plex); C2(Carbamidomethyl); C8(Carbamidomethyl)	1.43873	1		2.40682	1		0.837383	1		0.772123	1		0.855988	1		9.29	3	1540.71	-3.96106	0
tLNPEYLGQDGVQR	4	1	1	W5NPK5	N-Term(iTRAQ8plex)	1.26497	4	12.6929	1.19104	4	4.56699	1.53285	4	20.4552	1.35953	4	7.01409	1.77372	4	11.2116	9.28	2	1893.99	-2.63792	0
gTLVQTk	1	3	1	W5NS65	N-Term(iTRAQ8plex); K7(iTRAQ8plex)	1.47066	1		1.47705	1		1.43074	1		0.946777	1		1.44282	1		8.22	2	1354.85	-0.949216	0
sVTGGYVYR	1	2	1	W5PV41	N-Term(iTRAQ8plex)	1.17268	1		0.982316	1		1.41756	1		1.48066	1		1.38934	1		7.52	2	1305.7	-5.57455	0
iTGPITVk	1	1	1	W5QAR8	N-Term(iTRAQ8plex); K8(iTRAQ8plex)	0.617333	1		0.953515	1		1.42604	1		2.4399	1		1.61199	1		7.05	3	1436.93	0.552074	0
gGcEAIVDTGTSLmVGPVDEVR	1	1	1	Q9MZS8	N-Term(iTRAQ8plex); C3(Carbamidomethyl); M14(Oxidation)	0.919867	1		0.966271	1		1.0515	1		1.26677	1		1.24704	1		5.94	3	2582.29	5.82955	0
sAISkPk	1	1	1	W5NXW9	N-Term(iTRAQ8plex); K5(iTRAQ8plex); K7(iTRAQ8plex)	0.520658	1		0.388791	1		0.387009	1		0.375042	1		0.427609	1		4.61	2	1643.06	-1.9719	0
iSHELDSVSSEVN	1	2	1	Q9XSY9	N-Term(iTRAQ8plex)	1.3487	1		0.960757	1		1.30164	1		1.29315	1		2.14134	1		4.52	2	1719.86	-3.55142	0
lESDVSTQMEYcR	1	2	1	W5NQ46	N-Term(iTRAQ8plex); C12(Carbamidomethyl)	1.86824	1		2.39261	1		2.54968	1		2.24953	1		2.44748	1		4.42	2	1921.89	-2.30267	0
aGALcLSR	1	1	1	W5NSA6	N-Term(iTRAQ8plex); C5(Carbamidomethyl)	2.05525	1		2.06684	1		1.01502	1		0.741235	1		0.7127	1		3.09	2	1151.65	-4.49602	0
gLLLDTSR	2	4	1	B2LSM6	N-Term(iTRAQ8plex)	1.01984	1		0.744728	1		1.05797	1		1.12465	1		1.35941	1		2.48	2	1178.7	-2.09151	0
yGVSGYPTLk	1	2	1	W5PMM7	N-Term(iTRAQ8plex); K10(iTRAQ8plex)	0.904023	1		0.702515	1		0.833954	1		0.684435	1		0.814757	1		2.47	3	1692.98	0.673289	0
sLHTLFGDELck	1	2	2	P14639;W5PWE9	N-Term(iTRAQ8plex); C11(Carbamidomethyl); K12(iTRAQ8plex)																1.8	4	2028.1	-0.392928	0
iTVDIGTPS	1	2	1	F5CC79	N-Term(iTRAQ8plex)	1.33787	1		0.922285	1		1.07886	1		1.09017	1		1.10217	1		50.43	2	1206.68	-4.09726	0
aQHPEAk	4	1	1	W5PMT0	N-Term(iTRAQ8plex); K7(iTRAQ8plex)	1.06655	4	22.434	0.932823	4	40.1707	0.760047	4	15.9139	0.857793	4	20.475	1.25028	4	41.1194	28.89	2	1388.8	-8.02508	0
aQYDELAQk	2	2	1	W5P2K5	N-Term(iTRAQ8plex); K9(iTRAQ8plex)	1.4023	2	16.6113	1.33644	2	13.9482	1.68239	2	16.6075	1.63654	2	15.3965	2.54031	2	14.5669	27.82	3	1673.93	-1.64881	0
iTVDDk	33	6	3	E7BQS5;P04654;E7BQS3	N-Term(iTRAQ8plex); K6(iTRAQ8plex)																24.14	3	1298.77	-6.91574	0
gVcQQGTR	1	1	1	W5PE92	N-Term(iTRAQ8plex); C3(Carbamidomethyl)	1.25249	1		0.789759	1		1.15405	1		1.22754	1		1.17984	1		23.8	2	1209.63	0.989158	0
eMPFPk	100	2	1	P11839	N-Term(iTRAQ8plex); K6(iTRAQ8plex)	1.35318	100	13.1635	1.40722	100	38.3273	2.70586	100	42.6552	3.36908	100	42.6176	4.43273	100	44.0145	21.91	2	1356.78	-1.7287	0
vFTVDHk	2	1	1	W5NRI1	N-Term(iTRAQ8plex); K7(iTRAQ8plex)	0.955339	2	3.6272	0.88723	2	11.2797	0.920602	2	10.2097	1.03006	2	7.64921	1.05188	2	10.3419	21.91	3	1453.86	-4.46585	0
eVLSDPEMR	1	1	1	W5NVV6	N-Term(iTRAQ8plex)	0.94527	1		0.705307	1		0.869302	1		0.954094	1		1.28786	1		20.36	2	1379.71	-1.75523	0
gLDIQk	49	3	1	P67975	N-Term(iTRAQ8plex); K6(iTRAQ8plex)	0.891187	49	8.50117	0.846131	49	18.9473	1.25478	49	25.4862	1.87446	49	17.1459	2.07307	49	21.2317	20.15	2	1281.79	-6.79262	0
vDIGLIk	2	1	1	W5P0Q4	N-Term(iTRAQ8plex); K7(iTRAQ8plex)	1.57491	2	18.3059	2.65316	2	47.2781	1.45498	2	54.5589	0.864842	2	50.6238	0.693289	2	20.4262	18.8	3	1365.89	-1.92113	0
vLASSAR	7	2	2	P14639;W5PWE9	N-Term(iTRAQ8plex)																18.58	2	1007.61	-0.678651	0
fYSFEk	4	1	1	W5P9V5	N-Term(iTRAQ8plex); K6(iTRAQ8plex)	0.669414	4	6.62475	0.693722	4	15.5291	0.836778	4	13.4072	1.13905	4	6.8404	0.962904	4	6.68653	18.01	2	1428.79	-3.54202	0
aSSSGATR	1	2	1	F2YQ13	N-Term(iTRAQ8plex)	0.657216	1		0.657966	1		0.918523	1		0.79132	1		0.89116	1		16.35	2	1040.56	1.02409	0
iLFLPk	13	1	1	W5P9V5	N-Term(iTRAQ8plex); K6(iTRAQ8plex)	0.595534	13	13.5207	0.543017	13	10.3641	0.727469	13	12.6394	0.977312	13	16.524	0.901517	13	11.4954	16.23	2	1338.89	-2.48639	0
aVEHIQk	1	1	1	W5NWM2	N-Term(iTRAQ8plex); K7(iTRAQ8plex)	1.09946	1		1.09918	1		1.65742	1		1.59824	1		1.4168	1		16.01	3	1432.87	-3.32091	0
cASIQk	2	2	2	P14639;W5PWE9	N-Term(iTRAQ8plex); C1(Carbamidomethyl); K6(iTRAQ8plex)																15.94	2	1314.76	-3.30176	0
ccEDGMR	1	1	1	W5NRH2	N-Term(iTRAQ8plex); C1(Carbamidomethyl); C2(Carbamidomethyl)	1.39447	1		1.56978	1		1.11	1		1.74478	1		1.38181	1		15.88	2	1231.52	2.27017	0
eTMVPk	57	2	1	P11839	N-Term(iTRAQ8plex); K6(iTRAQ8plex)	1.71318	57	23.5339	1.54935	57	22.2707	2.54032	57	36.0334	4.35362	57	20.014	4.9557	57	27.8712	15.37	2	1312.77	-2.27973	0
fLcQQk	2	1	1	W5P9V5	N-Term(iTRAQ8plex); C3(Carbamidomethyl); K6(iTRAQ8plex)	0.751636	2	19.1205	0.81549	2	20.7333	0.91703	2	32.9457	1.30153	2	37.6973	1.15327	2	31.7853	14.97	2	1431.82	-5.7521	0
iTFYQDGk	1	2	1	W5PK06	N-Term(iTRAQ8plex); K8(iTRAQ8plex)	0.37148	1		0.284835	1		0.334578	1		0.319165	1		0.346667	1		14.6	3	1579.89	-0.46689	0
aGIALNDNFVk	1	1	1	W5P448	N-Term(iTRAQ8plex); K11(iTRAQ8plex)	0.60375	1		0.86854	1		0.890547	1		1.13034	1		1.12577	1		14.54	2	1770.02	-9.03244	0
vDPVNFk	2	5	1	C6ZP47	N-Term(iTRAQ8plex); K7(iTRAQ8plex)	1.26465	2	11.4963	0.631812	2	83.5987	0.674453	2	61.8385	0.759577	2	46.5542	0.930449	2	24.9958	14.5	3	1426.85	0.322758	0
aFSINFR	3	5	2	I1WXR3;W5PZS7	N-Term(iTRAQ8plex)																14.43	2	1158.66	0.705431	0
dIFQEIYDk	1	2	1	W5QCD6	N-Term(iTRAQ8plex); K9(iTRAQ8plex)	1.31961	1		1.91772	1		1.7938	1		2.25172	1		1.67234	1		13.13	3	1778.97	-4.80474	0
lDLLEDR	1	2	1	W5Q302	N-Term(iTRAQ8plex)	1.09469	1		0.933046	1		0.822646	1		0.81844	1		1.16796	1		12.96	2	1177.67	-4.05106	0
eVPcASVk	1	1	1	W5PH81	N-Term(iTRAQ8plex); C4(Carbamidomethyl); K8(iTRAQ8plex)	0.76582	1		0.816404	1		0.917116	1		0.880816	1		0.734503	1		12.78	2	1497.85	-1.97525	0
eYGSQk	2	1	1	W5NVX6	N-Term(iTRAQ8plex); K6(iTRAQ8plex)	0.74668	2	1.29066	0.599339	2	27.0788	0.82401	2	32.1168	1.10185	2	48.9765	0.73892	2	26.4497	10.98	2	1319.74	-1.77911	0
lESDVPDLR	1	1	1	W5Q5H8	N-Term(iTRAQ8plex)	1.36204	1		1.45439	1		2.65058	1		2.24781	1		1.53223	1		10.84	2	1347.74	-2.85846	0
vLQTTPGSPIR	1	1	1	W5PH95	N-Term(iTRAQ8plex)	1.43602	1		0.414877	1		0.441491	1		0.412761	1		0.285838	1		9.28	2	1472.86	-6.07356	0
nIVEILR	4	1	1	W5Q5H8	N-Term(iTRAQ8plex)	1.55426	4	13.4972	1.75021	4	18.7248	1.87735	4	19.3803	1.19968	4	20.1875	1.72571	4	21.941	8.67	2	1160.73	-1.86281	0
sSMFQNR	1	2	1	W5Q6N3	N-Term(iTRAQ8plex)	1.4013	1		1.34238	1		1.3511	1		1.18062	1		1.45852	1		8.11	2	1173.6	-2.81589	0
dAPcLLk	2	1	1	W5P6E0	N-Term(iTRAQ8plex); C4(Carbamidomethyl); K7(iTRAQ8plex)	1.59305	2	17.5994	1.18597	2	7.18503	1.32811	2	0.242191	1.60696	2	3.45628	1.81643	2	15.8674	7.87	2	1424.84	-0.604185	0
dISLADYk	1	1	1	W5NUE3	N-Term(iTRAQ8plex); K8(iTRAQ8plex)	0.538734	1		0.510595	1		0.561473	1		0.481103	1		0.630401	1		7.02	3	1532.87	-7.47653	0
lFQPTHk	1	2	1	Q9MZY2	N-Term(iTRAQ8plex); K7(iTRAQ8plex)	1.37448	1		1.51072	1		2.18218	1		1.60896	1		1.88167	1		6.12	3	1478.89	-0.313757	0
lHTDVPSR	1	1	1	W5QHZ8	N-Term(iTRAQ8plex)	0.80395	1		0.736021	1		1.29763	1		0.801835	1		0.804469	1		5.87	3	1228.69	-0.288081	0
lGSLSTk	3	1	1	A6ZE99	N-Term(iTRAQ8plex); K7(iTRAQ8plex)	1.22497	3	2.65408	1.13024	3	0.204312	1.24098	3	2.54614	1.68373	3	2.1286	1.88191	3	5.19404	5.83	2	1313.82	-2.14049	0
lYImcMANLEELQSTDSLDcLER	6	1	1	W5Q9B6	N-Term(iTRAQ8plex); M4(Oxidation); C5(Carbamidomethyl); C20(Carbamidomethyl)	1.04334	6	17.6677	1.01104	6	10.4411	1.37475	6	8.44243	1.67941	6	24.2832	1.61514	6	21.5956	4.98	4	3124.46	0.849958	0
gGSTRPPcR	1	1	1	W5PTZ8	N-Term(iTRAQ8plex); C8(Carbamidomethyl)	1.62735	1		1.96415	1		3.139	1		3.04	1		4.97859	1		4.07	3	1291.68	-2.63531	0
vSIRPALEPVk	1	2	2	W5P5T4;W5NPK5	N-Term(iTRAQ8plex); K11(iTRAQ8plex)																3.71	3	1817.14	-2.33773	0
kAQDFQGR	2	1	1	W5P9V5	N-Term(iTRAQ8plex); K1(iTRAQ8plex)	0.457467	2	12.5879	0.47485	2	9.05759	0.582837	2	1.20397	0.726706	2	3.56544	0.671496	2	2.71061	3.5	2	1557.89	-3.19447	1
tVkPSEcS	4	1	1	W5PSQ7	N-Term(iTRAQ8plex); K3(iTRAQ8plex); C7(Carbamidomethyl)	0.206263	4	14.9802	0.120983	4	45.7548	0.181108	4	28.3775	0.121172	4	26.0202	0.139773	4	39.7705	3.22	2	1515.83	-1.25932	0
tATSPVGVQPILNENTFcVGLSk	1	1	1	W5P0Q4	N-Term(iTRAQ8plex); C18(Carbamidomethyl); K23(iTRAQ8plex)	1.08086	1		0.851221	1		0.783361	1		0.908537	1		0.715571	1		0.72	3	3040.64	-5.65769	0
dAPSPVDAAFR	2	1	1	W5QAB1	N-Term(iTRAQ8plex)	3.87046	2	4.89087	2.05441	2	7.31152	1.75148	2	27.5144	1.24632	2	12.1801	0.790602	2	23.9255	32.62	2	1449.76	-4.31332	0
tGPLGPGk	1	1	1	W5NXZ8	N-Term(iTRAQ8plex); K8(iTRAQ8plex)	2.28458	1		3.38167	1		4.35501	1		11.4049	1		10.4106	1		30.36	2	1334.82	-5.93561	0
aPVDAFk	1	4	1	D3G9G3	N-Term(iTRAQ8plex); K7(iTRAQ8plex)	0.830229	1		2.77886	1		0.455131	1		0.454005	1		0.508568	1		25.83	2	1355.81	-5.09708	0
gESAGLVTATGR	1	1	1	W5NRG7	N-Term(iTRAQ8plex)	1.5745	1		1.79762	1		0.798742	1		0.808613	1		0.73487	1		24.73	2	1422.78	-1.37508	0
aVLEAk	1	1	1	W5PDJ6	N-Term(iTRAQ8plex); K6(iTRAQ8plex)	0.799903	1		0.622855	1		1.04787	1		1.24264	1		1.03094	1		20.73	2	1238.79	-4.01352	0
qLFDQVVk	1	3	1	W5PUV9	N-Term(iTRAQ8plex); K8(iTRAQ8plex)	0.63234	1		0.904212	1		0.659131	1		0.552187	1		0.549114	1		17.32	3	1584.95	-1.32695	0
dANSAk	2	1	1	W5P9V5	N-Term(iTRAQ8plex); K6(iTRAQ8plex)	0.572593	2	4.86884	0.712731	2	7.65083	0.902414	2	0.256208	1.3805	2	8.33998	1.3313	2	6.155	16.88	2	1213.69	-3.96268	0
hYAHTDcPGHADYVk	1	1	1	W5NWF7	N-Term(iTRAQ8plex); C7(Carbamidomethyl); K15(iTRAQ8plex)	1.44016	1		1.50446	1		1.38702	1		1.94848	1		2.02137	1		13.69	4	2379.19	7.23889	0
lAEQAER	2	11	2	H9CJU6;W5Q0Q1	N-Term(iTRAQ8plex)																13.16	2	1120.62	-1.65263	0
iTDPLLk	1	1	1	W5PJG0	N-Term(iTRAQ8plex); K7(iTRAQ8plex)	1.90632	1		0.615086	1		0.483368	1		0.672058	1		0.500267	1		12.05	2	1407.9	-3.3939	0
nAASFk	4	1	1	A6ZE99	N-Term(iTRAQ8plex); K6(iTRAQ8plex)	0.948671	4	6.92143	0.994309	4	21.3562	1.01099	4	9.85382	0.958031	4	4.95255	1.01217	4	14.5816	10.48	2	1245.74	-3.34358	0
dLPQAQR	1	1	1	W5QAB1	N-Term(iTRAQ8plex)	0.953673	1		1.0933	1		1.59069	1		0.900823	1		1.08486	1		9.71	2	1131.64	-1.84238	0
tGTDVYR	1	1	1	W5Q6N3	N-Term(iTRAQ8plex)	1.48412	1		1.67199	1		2.05492	1		1.64019	1		2.1258	1		9.6	2	1115.59	-4.87036	0
lYImcmANLEELQSTDSLDcLER	1	1	1	W5Q9B6	N-Term(iTRAQ8plex); M4(Oxidation); C5(Carbamidomethyl); M6(Oxidation); C20(Carbamidomethyl)	1.34474	1		0.509195	1		1.25537	1		2.12395	1		1.7873	1		7.7	2	3140.45	-1.91896	0
gIEILNk	1	1	1	W5NTW3	N-Term(iTRAQ8plex); K7(iTRAQ8plex)	0.914769	1		1.04507	1		1.35659	1		1.44239	1		1.33986	1		6.45	2	1394.88	-0.264884	0
mVTSELR	1	2	1	Q9MZY2	N-Term(iTRAQ8plex); M1(Oxidation)	1.27308	1		1.30579	1		1.50434	1		0.945846	1		0.967085	1		5.87	2	1155.63	-1.34483	0
fYLTVLk	1	1	1	W5PMT0	N-Term(iTRAQ8plex); K7(iTRAQ8plex)	1.00828	1		1.03314	1		1.1995	1		1.29948	1		1.3404	1		5.65	3	1491.93	-3.75938	0
mIYASSk	1	4	1	W5Q9P7	N-Term(iTRAQ8plex); K7(iTRAQ8plex)	0.753429	1		1.1137	1		0.859466	1		0.841047	1		1.0186	1		5.36	2	1407.8	-9.40283	0
tLTELNk	1	1	1	W5QH64	N-Term(iTRAQ8plex); K7(iTRAQ8plex)	1.21724	1		1.22966	1		1.28723	1		1.15233	1		1.14655	1		3.7	2	1426.87	-4.2461	0
fGSDDEGk	1	2	1	Q9GK30	N-Term(iTRAQ8plex); K8(iTRAQ8plex)	1.92019	1		1.21139	1		1.70186	1		1.74934	1		3.10028	1		3.66	2	1462.76	-3.21769	0
lNELSk	1	1	1	W5PWS5	N-Term(iTRAQ8plex); K6(iTRAQ8plex)	1.38753	1		1.46345	1		2.01011	1		2.23743	1		2.7366	1		21.11	2	1311.8	-5.00944	0
lIPETLk	1	1	1	W5PHP7	N-Term(iTRAQ8plex); K7(iTRAQ8plex)	1.57293	1		1.78347	1		2.59005	1		1.68713	1		1.64544	1		20.98	2	1421.92	-1.57519	0
qANTEER	1	2	1	F2YQ13	N-Term(iTRAQ8plex)	0.70665	1		0.733658	1		0.980445	1		0.939838	1		1.01869	1		20.86	2	1151.59	-2.508	0
iVDLVk	1	4	2	I1WXR3;W5PZS7	N-Term(iTRAQ8plex); K6(iTRAQ8plex)																18.5	2	1294.85	-1.56014	0
lLLQDTDR	1	1	1	W5NRG7	N-Term(iTRAQ8plex)	1.89281	1		1.63321	1		1.62204	1		1.11922	1		1.00877	1		16.95	2	1277.73	-4.83275	0
aTVVFk	1	3	1	A0A059VBM8	N-Term(iTRAQ8plex); K6(iTRAQ8plex)	0.764447	1		0.55462	1		0.552668	1		0.813312	1		0.516401	1		16.26	2	1272.81	0.618593	0
dADEAk	1	1	1	W5PZS7	N-Term(iTRAQ8plex); K6(iTRAQ8plex)	0.956621	1		0.697497	1		0.668474	1		1.60084	1		0.170944	1		14.91	2	1256.69	-3.01905	0
lIPETLTR	1	2	1	W5NXP3	N-Term(iTRAQ8plex)	1.0272	1		1.18408	1		1.58079	1		0.856837	1		0.997388	1		14.88	3	1246.77	-1.13818	0
qSPELMk	1	1	1	W5P6E0	N-Term(iTRAQ8plex); K7(iTRAQ8plex)	0.71514	1		0.722856	1		0.883191	1		1.00841	1		0.996812	1		13.88	2	1440.83	-0.542567	0
dSNTLTk	1	1	1	W5Q5H8	N-Term(iTRAQ8plex); K7(iTRAQ8plex)	1.78333	1		2.46254	1		2.43317	1		1.76533	1		1.49388	1		13.19	2	1386.8	-5.90775	0
rPTGVPDR	1	1	1	W5NX95	N-Term(iTRAQ8plex)	0.53534	1		0.580558	1		0.681553	1		0.570351	1		0.540426	1		13.1	3	1201.69	-3.40471	0
iTSIVk	1	3	1	W5Q1W2	N-Term(iTRAQ8plex); K6(iTRAQ8plex)	0.807915	1		0.814769	1		1.13381	1		1.31641	1		1.13314	1		12.17	2	1268.83	-5.41282	0
lkDVPPk	2	1	1	W5PMT0	N-Term(iTRAQ8plex); K2(iTRAQ8plex); K7(iTRAQ8plex)	0.81201	2	40.632	0.708195	2	45.0663	0.66526	2	20.7691	0.619329	2	16.7793	0.648161	2	17.6359	11.21	3	1709.11	-0.453407	1
dNIPEGR	2	1	1	W5NRI1	N-Term(iTRAQ8plex)	0.79273	2	19.0616	1.00668	2	4.72973	1.00616	2	4.6504	1.20895	2	10.1206	1.39128	2	8.41057	10.9	2	1104.59	-1.63135	0
dISYLYR	2	1	1	W5P1W2	N-Term(iTRAQ8plex)	1.32712	2	4.22171	1.24061	2	3.02516	1.47412	2	8.04305	1.23114	2	2.57132	1.2214	2	10.9638	10.6	2	1233.68	-1.72686	0
iLVTGSIGGLMALPFNAVYcASk	1	1	1	W5NVZ9	N-Term(iTRAQ8plex); C20(Carbamidomethyl); K23(iTRAQ8plex)																10.44	2	2990.67	-0.173184	0
dVPDHk	2	4	3	W5P5T4;W5NPK5;O46544	N-Term(iTRAQ8plex); K6(iTRAQ8plex)																10.17	2	1318.75	-2.0648	0
iAGEASR	1	19	1	W5PUF2	N-Term(iTRAQ8plex)	1.1925	1		1.27639	1		0.945973	1		0.863617	1		1.16348	1		8.77	2	1007.58	-2.25063	0
nAcVDk	4	2	1	W5PMT0	N-Term(iTRAQ8plex); C3(Carbamidomethyl); K6(iTRAQ8plex)	0.856067	4	4.36197	1.18022	4	39.665	0.715535	4	40.3351	0.775116	4	35.3627	0.627485	4	41.4438	8.75	2	1314.73	-2.37104	0
aVLGEVk	1	1	1	W5Q0L1	N-Term(iTRAQ8plex); K7(iTRAQ8plex)	1.43819	1		1.0385	1		0.719129	1		0.688933	1		0.958578	1		7.23	3	1323.84	-3.86189	0
gGNEESTk	1	3	1	G8FRI7	N-Term(iTRAQ8plex); K8(iTRAQ8plex)	0.564526	1		0.759046	1		0.843106	1		0.679927	1		0.636685	1		7.12	2	1429.77	-3.39532	0
vcDVQAGVR	1	1	1	W5P8R7	N-Term(iTRAQ8plex); C2(Carbamidomethyl)	0.405504	1		0.407404	1		0.316982	1		0.499401	1		0.419204	1		6.84	2	1307.7	-2.30462	0
aLAAAGYDVEk	1	1	1	W5NS65	N-Term(iTRAQ8plex); K11(iTRAQ8plex)	0.993924	1		2.95607	1		1.57046	1		1.64933	1		1.74284	1		5.7	3	1715.98	0.790467	0
yLQFcLGWFANPIYAGDYPQVMk	1	1	1	W5QA36	N-Term(iTRAQ8plex); C5(Carbamidomethyl); K23(iTRAQ8plex)	1.46792	1		0.278535	1		0.273046	1		0.219402	1		0.281854	1		3.93	4	3389.72	-3.84544	0
gTDFNLNELk	1	1	1	W5PF65	N-Term(iTRAQ8plex); K10(iTRAQ8plex)	1.10347	1		1.18278	1		1.55633	1		0.975579	1		0.865954	1		21.73	2	1758.98	-1.24039	0
aADESER	1	7	1	W5QI04	N-Term(iTRAQ8plex)	1.04811	1		1.53805	1		1	1		0.835227	1		0.975635	1		20.57	2	1081.54	0.818645	0
sTTPPk	1	1	1	W5PFM6	N-Term(iTRAQ8plex); K6(iTRAQ8plex)	0.312433	1		0.252129	1		0.367833	1		0.302825	1		0.327263	1		17.39	2	1238.75	-3.50232	0
tISALk	1	1	1	W5PMT0	N-Term(iTRAQ8plex); K6(iTRAQ8plex)	0.830016	1		0.939226	1		0.985403	1		1.04617	1		0.83972	1		16.92	2	1240.8	-4.90452	0
aPmPELVPk	2	1	1	W5PSA9	N-Term(iTRAQ8plex); M3(Oxidation); K9(iTRAQ8plex)	0.954099	2	40.3909	0.809961	2	26.9419	0.83029	2	27.0677	1.13678	2	44.6243	1.27508	2	6.68462	16.54	2	1605.93	-9.62601	0
vIQELGLDk	1	2	1	Q009B1	N-Term(iTRAQ8plex); K9(iTRAQ8plex)	0.805471	1		1.32094	1		1.16551	1		1.10672	1		1.24589	1		14.88	3	1622.99	0.442795	0
eAIIck	1	2	1	W5QCD6	N-Term(iTRAQ8plex); C5(Carbamidomethyl); K6(iTRAQ8plex)	0.777743	1		1.62697	1		1.16067	1		1.39521	1		1.39849	1		14.43	2	1341.8	-4.5456	0
yPLYTk	2	2	1	F5CC79	N-Term(iTRAQ8plex); K6(iTRAQ8plex)	0.823668	2	4.77585	0.865087	2	7.44277	1.28557	2	7.74073	1.3669	2	7.49917	1.36004	2	10.1893	13.65	3	1392.83	-5.08424	0
qQSTck	1	1	1	W5Q5H8	N-Term(iTRAQ8plex); C5(Carbamidomethyl); K6(iTRAQ8plex)	2.34423	1		3.15014	1		2.97103	1		1.36194	1		1.02917	1		13.58	2	1359.75	-4.33207	0
iLYSQcGDVMR	1	2	1	B0FZM4	N-Term(iTRAQ8plex); C6(Carbamidomethyl)	0.991108	1		1.17539	1		0.638128	1		0.481363	1		0.582958	1		13.01	2	1645.83	0.230336	0
yMAQGk	1	2	1	C7DLN1	N-Term(iTRAQ8plex); K6(iTRAQ8plex)	0.614292	1		1.77985	1		1.24664	1		0.84745	1		0.884425	1		12.59	2	1305.74	-7.0797	0
vVPEGIR	1	1	1	W5NPK5	N-Term(iTRAQ8plex)	0.997264	1		0.981685	1		0.919442	1		0.917865	1		0.960984	1		11.44	2	1073.66	-0.602376	0
eLASLGk	1	2	1	W5PTG9	N-Term(iTRAQ8plex); K7(iTRAQ8plex)	1.22684	1		1.455	1		1.87346	1		1.97065	1		1.53664	1		9.02	3	1325.82	-4.25645	0
iVVLGIWDYIENk	1	1	1	W5NTK7	N-Term(iTRAQ8plex); K13(iTRAQ8plex)	0.734942	1		4.41225	1		2.01646	1		1.3087	1		1.15322	1		7.96	2	2170.27	0.787293	0
hVVFGk	1	7	2	Q864L8;Q5TIK9	N-Term(iTRAQ8plex); K6(iTRAQ8plex)																5.85	3	1294.8	-3.41297	0
gYDIAQISR	1	2	1	W5NTD9	N-Term(iTRAQ8plex)	0.829037	1		1.26625	1		0.763618	1		1.0422	1		1.10769	1		5.5	2	1326.73	-2.72265	0
mLLFTEVTR	1	2	1	W5PE22	N-Term(iTRAQ8plex)	1.10042	1		1.00409	1		1.06134	1		1.20061	1		1.16002	1		5.25	2	1413.8	-2.05412	0
vLmLTLQNDPPSLETGVQDk	1	1	1	W5NSJ5	N-Term(iTRAQ8plex); M3(Oxidation); K20(iTRAQ8plex)	1.03241	1		0.264727	1		0.131241	1		0.309377	1		0.249457	1		4.57	2	2822.53	-5.03099	0
yLLPFLSLQImDFLLcLLTLLGSYIELPAYLk	1	2	1	W5NVL1	N-Term(iTRAQ8plex); M11(Oxidation); C16(Carbamidomethyl); K32(iTRAQ8plex)	1.11082	1		3.14699	1		3.98207	1		5.40836	1		5.78944	1		2.23	4	4398.51	2.07119	0
iLVGSLEkNEFITLAHVNPQSFPAPk	1	2	1	W5Q524	N-Term(iTRAQ8plex); K8(iTRAQ8plex); K26(iTRAQ8plex)	0.333579	1		0.527008	1		0.508151	1		0.608147	1		1.64403	1		0.13	4	3762.17	-0.503036	1
aYGTIVk	1	1	0		N-Term(iTRAQ8plex); K7(iTRAQ8plex)																25.11	2	1359.84	-5.1938	0
aVPEAEGPQR	1	1	1	W5PFC9	N-Term(iTRAQ8plex)	1.95301	1		0.661708	1		0.770435	1		0.771309	1		0.72981	1		25.09	2	1357.73	-4.44436	0
aSVIIR	1	1	1	W5NPT7	N-Term(iTRAQ8plex)	1.06589	1		0.788477	1		1.04069	1		0.973007	1		1.07895	1		23.46	2	962.628	-1.68992	0
vIPVTPR	1	1	1	W5P979	N-Term(iTRAQ8plex)	0.90765	1		0.905859	1		0.714288	1		0.84285	1		1.26612	1		21.9	2	1085.68	-14.7655	0
nIILEEGk	1	2	1	W5Q9P7	N-Term(iTRAQ8plex); K8(iTRAQ8plex)	1.26913	1		1.35946	1		1.64777	1		1.34366	1		1.27987	1		21.56	2	1523.92	-0.961712	0
aAPPPk	1	1	1	W5Q4D0	N-Term(iTRAQ8plex); K6(iTRAQ8plex)	0.399956	1		0.426646	1		0.336382	1		0.29255	1		0.334568	1		21.08	2	1188.75	-5.79449	0
aVcDDR	1	1	1	W5PTZ8	N-Term(iTRAQ8plex); C3(Carbamidomethyl)	1.81536	1		3.39868	1		5.99176	1		5.82337	1		10.4758	1		20.25	2	1039.51	0.152635	0
lDNWGk	1	2	1	W5PNP1	N-Term(iTRAQ8plex); K6(iTRAQ8plex)	0.842489	1		0.613213	1		0.635866	1		0.750713	1		0.653154	1		19.63	2	1340.78	-0.656299	0
vTmQNLNDR	1	6	1	W5Q6L8	N-Term(iTRAQ8plex); M3(Oxidation)	1.38344	1		1.36082	1		1.44751	1		1.61286	1		2.40956	1		18.87	2	1410.73	-1.85082	0
sEIAHR	2	2	2	P14639;W5PWE9	N-Term(iTRAQ8plex)																18.73	2	1016.58	-3.62621	0
fVGDGGVR	1	1	1	W5PSD8	N-Term(iTRAQ8plex)	1.19319	1		1.10704	1		1.21488	1		0.88525	1		0.90124	1		15.36	2	1110.62	-1.13882	0
aYSDMR	1	3	2	P42819;W5PJG0	N-Term(iTRAQ8plex)																15.18	2	1046.52	-1.07252	0
tTLLYk	2	9	1	W5NUV2	N-Term(iTRAQ8plex); K6(iTRAQ8plex)	0.990693	1		1.04226	1		0.902215	1		1.12615	1		0.938328	1		15.03	2	1346.85	1.84096	0
tEVLVk	1	1	1	W5PSD8	N-Term(iTRAQ8plex); K6(iTRAQ8plex)	0.872562	1		0.682075	1		0.856271	1		0.79633	1		0.746759	1		14.64	2	1296.83	-4.01435	0
iPVSFEk	1	1	1	W5QGP4	N-Term(iTRAQ8plex); K7(iTRAQ8plex)	0.675752	1		0.685545	1		0.658362	1		0.430749	1		0.543061	1		14.02	3	1427.87	1.63765	0
sGVTcQk	1	1	1	W5P3R3	N-Term(iTRAQ8plex); C5(Carbamidomethyl); K7(iTRAQ8plex)	0.960012	1		1.20292	1		1.48854	1		1.21693	1		1.29063	1		13.8	2	1387.77	-7.54239	0
lHDNPALk	1	2	1	B3F206	N-Term(iTRAQ8plex); K8(iTRAQ8plex)	0.328453	1		0.339034	1		0.421585	1		0.311918	1		0.374567	1		12.8	2	1515.9	-7.50572	0
aWSVAR	1	2	2	P14639;W5PWE9	N-Term(iTRAQ8plex)																12.5	2	993.576	-2.06405	0
fGDEPVTk	1	2	1	W5PM94	N-Term(iTRAQ8plex); K8(iTRAQ8plex)	0.509162	1		0.63974	1		0.530409	1		0.536604	1		0.590704	1		11.11	2	1500.85	-3.00075	0
yFVPPSER	1	1	1	D6PZY4	N-Term(iTRAQ8plex)	1.34777	1		1.10631	1		1.30553	1		1.15219	1		1.05868	1		9.79	2	1298.7	-0.292652	0
dIPAALPAAR	1	1	1	W5PBZ7	N-Term(iTRAQ8plex)	1.78953	1		0.994588	1		1.54963	1		1.18575	1		1.12314	1		9.3	2	1298.77	-2.02634	0
dVVLLEQGR	1	1	1	W5P673	N-Term(iTRAQ8plex)	0.380086	1		0.296089	1		0.202491	1		0.207077	1		0.253716	1		8.73	2	1332.78	-0.674981	0
tQSTFk	1	5	1	W5NU39	N-Term(iTRAQ8plex); K6(iTRAQ8plex)	1.64234	1		2.65939	1		2.7678	1		2.67618	1		2.60847	1		7.01	2	1319.76	-9.92843	0
dAEEAk	1	5	1	I1WXR3	N-Term(iTRAQ8plex); K6(iTRAQ8plex)	1.0189	1		1.04155	1		2.04631	1		1.38189	1		1.66217	1		6.49	2	1270.71	-3.58182	0
tYDSEFLVSk	1	1	1	W5PHP7	N-Term(iTRAQ8plex); K10(iTRAQ8plex)	2.2485	1		1.26407	1		1.31473	1		1.65131	1		1.51462	1		4.81	3	1796.99	-0.952962	0
eGNLAIQQAGkNMSAk	1	1	1	W5P7E7	N-Term(iTRAQ8plex); K11(iTRAQ8plex); K16(iTRAQ8plex)	1.09183	1		1.11683	1		1.48558	1		1.40349	1		1.72307	1		2.57	4	2572.46	-0.171562	1
lVASmPLFANADPNFVTAmLTk	1	1	1	W5PG78	N-Term(iTRAQ8plex); M5(Oxidation); M19(Oxidation); K22(iTRAQ8plex)	1.57047	1		1.23768	1		1.30059	1		0.912713	1		1.05659	1		2.47	4	2991.61	-0.35007	0
dLEEVR	1	1	1	W5NX51	N-Term(iTRAQ8plex)	1.77977	1		1.68105	1		2.54812	1		1.76034	1		1.90663	1		24.57	2	1064.59	-1.07567	0
eQLSLR	1	1	1	W5NXW9	N-Term(iTRAQ8plex)	0.469197	1		0.249912	1		0.212075	1		0.173639	1		0.230475	1		23.71	2	1049.62	-2.2224	0
lPEGDLGk	1	2	1	C8BKE6	N-Term(iTRAQ8plex); K8(iTRAQ8plex)	0.850399	1		1.02151	1		0.947432	1		0.861516	1		0.985333	1		20.79	2	1436.85	-6.33705	0
emPFPk	5	2	1	P11839	N-Term(iTRAQ8plex); M2(Oxidation); K6(iTRAQ8plex)	1.40045	5	5.83104	1.73392	5	12.1398	2.96748	5	10.4097	4.02465	5	10.3135	5.0285	5	1.91797	19.66	3	1372.76	-8.37369	0
gSVIQk	1	2	1	P29701	N-Term(iTRAQ8plex); K6(iTRAQ8plex)	0.748369	1		0.81969	1		1.34686	1		0.947916	1		0.879784	1		18.75	2	1239.78	-7.26014	0
lETEEk	1	1	0		N-Term(iTRAQ8plex); K6(iTRAQ8plex)																18.57	2	1356.78	-4.91349	0
gSFPWQAk	1	1	1	W5P0Q4	N-Term(iTRAQ8plex); K8(iTRAQ8plex)	1.18169	1		1.61826	1		1.34782	1		1.07185	1		1.21389	1		16.88	3	1528.86	-5.87354	0
mLGVPVNR	1	1	1	W5PMT0	N-Term(iTRAQ8plex); M1(Oxidation)	0.762733	1		1.32082	1		0.748155	1		0.811796	1		0.686845	1		16.32	2	1205.7	-0.619738	0
dQYScR	2	4	1	A4ZVY8	N-Term(iTRAQ8plex); C5(Carbamidomethyl)	1.06372	2	6.50515	0.973161	2	13.3003	1.1362	2	30.4488	1.36321	2	32.9362	1.32188	2	22.8116	15.77	2	1132.53	-1.11414	0
lDLAGR	3	15	1	P60713	N-Term(iTRAQ8plex)	0.631514	1		1.24389	1		0.670557	1		0.416161	1		0.53626	1		15.05	2	948.576	-2.20014	0
mQIFVk	1	7	1	P0CG55	N-Term(iTRAQ8plex); K6(iTRAQ8plex)	0.708732	1		0.581574	1		0.850633	1		1.09359	1		1.01802	1		14.53	3	1373.84	-2.27435	0
vLVIPk	2	3	1	W5Q4K3	N-Term(iTRAQ8plex); K6(iTRAQ8plex)	1.12537	1		1.88397	1		2.10766	1		3.13573	1		2.88366	1		14.33	3	1276.88	-1.7855	0
vLPPSSLcQLSSAR	1	2	1	W5PRX0	N-Term(iTRAQ8plex); C8(Carbamidomethyl)	1.23441	1		1.43516	1		1.28377	1		1.51412	1		1.37037	1		14.12	2	1819	-1.22713	0
lIIQLDk	2	3	1	W5PCT4	N-Term(iTRAQ8plex); K7(iTRAQ8plex)	0.983183	2	14.4311	1.35446	2	18.7708	0.977038	2	23.3156	0.864184	2	59.0603	0.863876	2	71.7317	12.4	3	1450.94	-1.48965	0
aLDQLGIPAYNHTDk	1	1	1	W5PP98	N-Term(iTRAQ8plex); K15(iTRAQ8plex)	1.17861	1		1.27337	1		1.12981	1		1.32224	1		1.87395	1		11.54	3	2264.21	-18.3284	0
dGDmVILLQk	1	1	1	W5Q629	N-Term(iTRAQ8plex); M4(Oxidation); K10(iTRAQ8plex)	1.06165	1		0.691516	1		0.953835	1		1.95096	1		2.20901	1		10.45	3	1756.01	-1.80933	0
nSVLLIk	1	1	1	W5QAB1	N-Term(iTRAQ8plex); K7(iTRAQ8plex)	1.0346	1		1.11446	1		1.47437	1		1.46703	1		1.3179	1		7.93	2	1394.92	-1.31719	0
aFSMDEHNAALR	1	1	1	W5PS44	N-Term(iTRAQ8plex)	0.79305	1		1.00212	1		0.746839	1		0.879335	1		1.03492	1		4.34	3	1665.83	-1.48113	0
sSETSAFVk	1	2	1	W5PBM7	N-Term(iTRAQ8plex); K9(iTRAQ8plex)	0.667676	1		0.698393	1		0.826899	1		0.751122	1		0.726498	1		3.15	3	1563.88	0.678149	0
fDSWPcVmGR	1	1	1	W5NPT7	N-Term(iTRAQ8plex); C6(Carbamidomethyl); M8(Oxidation)	0.894114	1		0.804628	1		0.855879	1		0.887013	1		0.875569	1		1.65	2	1574.74	-2.00061	0
lSAGSPk	1	1	1	W5PF70	N-Term(iTRAQ8plex); K7(iTRAQ8plex)	3.19409	1		1.25009	1		4.05444	1		4.30553	1		4.5831	1		0.57	2	1267.78	-0.974474	0
aLLYLcGGDD	1	1	1	A2SW69	N-Term(iTRAQ8plex); C6(Carbamidomethyl)	1.32125	1		1.61673	1		1.18137	1		1.73593	1		1.82596	1		24.79	2	1400.7	-2.21488	0
sLLEDIR	2	3	1	W5NQ46	N-Term(iTRAQ8plex)	1.53127	1		1.57027	1		1.50947	1		1.16019	1		1.14849	1		18.24	2	1149.68	-2.09148	0
tTMPLW	1	2	1	G3LUQ4	N-Term(iTRAQ8plex)	3.96651	1		1.24432	1		0.650191	1		7.01057	1		0.672417	1		17.11	2	1052.57	-1.48712	0
lDLDHk	1	2	1	Q9XSY9	N-Term(iTRAQ8plex); K6(iTRAQ8plex)	2.466	1		2.29545	1		3.50675	1		11.8666	1		8.22721	1		16.54	3	1348.8	-3.12516	0
gAAPGk	1	2	1	W5NUN9	N-Term(iTRAQ8plex); K6(iTRAQ8plex)	0.267327	1		0.174824	1		0.202291	1		0.202961	1		0.234636	1		15.04	3	1108.69	-1.78577	0
iTYEck	1	2	1	D6PZY4	N-Term(iTRAQ8plex); C5(Carbamidomethyl); K6(iTRAQ8plex)	1.05852	1		1.17664	1		1.40043	1		1.06634	1		0.689385	1		13.73	2	1421.78	-6.13782	0
eTASLR	1	2	1	W5NX51	N-Term(iTRAQ8plex)	1.7128	1		1.81195	1		2.40285	1		1.28947	1		1.52115	1		13.29	2	980.567	-0.46088	0
lTEESEk	1	2	1	W5P3X8	N-Term(iTRAQ8plex); K7(iTRAQ8plex)	1.03591	1		0.807361	1		1.18123	1		0.86874	1		2.69046	1		10.74	2	1443.8	-8.28584	0
eELLMHLWR	1	1	1	W5P3H7	N-Term(iTRAQ8plex)	1.84434	1		1.75863	1		2.90288	1		2.57623	1		3.09533	1		9.71	2	1530.84	-0.372313	0
sLAPYAQDVQGk	1	1	1	W5NWM2	N-Term(iTRAQ8plex); K12(iTRAQ8plex)	1.26922	1		1.59881	1		1.37378	1		1.36095	1		1.24032	1		7.57	3	1885.06	-3.57401	0
vALSALk	1	2	1	B2MVW5	N-Term(iTRAQ8plex); K7(iTRAQ8plex)	0.905053	1		0.988889	1		1.35632	1		1.27154	1		1.39974	1		6.78	3	1309.87	0.84321	0
lLVNFDPk	1	1	1	W5Q293	N-Term(iTRAQ8plex); K8(iTRAQ8plex)	1.15761	1		0.69851	1		0.746253	1		0.769836	1		1.93588	1		6.44	3	1553.95	-0.521101	0
dFDTVPPVVR	1	4	3	W5P5T4;W5NPK5;O46544	N-Term(iTRAQ8plex)																5	2	1448.81	1.41855	0
aSGSWQTSPPQAkPPk	1	1	1	W5Q4D0	N-Term(iTRAQ8plex); K13(iTRAQ8plex); K16(iTRAQ8plex)	3.16998	1					1.90938	1		3.38505	1		4.48391	1		4.62	5	2579.47	-0.452604	0
lLYEkELYNILQGGVGIPQIR	1	1	1	W5P6W8	N-Term(iTRAQ8plex); K5(iTRAQ8plex)	1.46468	1		1.76081	1		2.77161	1		3.03995	1		4.3191	1		1.77	2	3024.77	-1.41045	1
yPDAVATWLkPDPSQk	1	3	1	Q9XSY9	N-Term(iTRAQ8plex); K10(iTRAQ8plex); K16(iTRAQ8plex)	1.33083	1		1.04869	1		0.996414	1		1.93452	1		1.71021	1		1.71	4	2728.54	-0.137668	0
