# Supplementary material for: Exploration of ovine milk whey proteome during postnatal development using an iTRAQ approach
Source: PeerJ. 2020 Oct 8;8:e10105. doi: 10.7717/peerj.10105 (PMC7548079; doi:10.7717/peerj.10105)
Supplement: Supplemental Information 3 [file peerj-08-10105-s003.xlsx]

## Sheet: Sheet1
Accession	Description	Coverage	# Proteins	# Unique Peptides	# Peptides	# PSMs	3d/0d	3d/0d Count	3d/0d Variability [%]	7d/0d	7d/0d Count	7d/0d Variability [%]	14d/0d	14d/0d Count	14d/0d Variability [%]	28d/0d	28d/0d Count	28d/0d Variability [%]	56d/0d	56d/0d Count	56d/0d Variability [%]	# AAs	MW [kDa]	calc. pI
P11839	Beta-casein OS=Ovis aries GN=CSN2 PE=1 SV=3 - [CASB_SHEEP]	37.84	30	3	8	1876	1.25274	922	20.3278	1.22529	922	19.9037	1.90511	922	25.8852	2.40784	922	26.8857	2.67482	922	29.7858	222	24.8592	5.35107
P67975	Beta-lactoglobulin OS=Ovis aries musimon GN=LGB PE=1 SV=1 - [LACB_OVIMU]	94.44	55	6	15	2237	0.907837	902	16.5001	0.869917	899	28.5043	1.10403	899	30.4496	1.59223	902	28.1321	1.68872	902	28.5018	162	18.1394	5.37646
D2DRB7	Alpha-s1-casein variant OS=Ovis aries GN=CSN1S1 PE=2 SV=1 - [D2DRB7_SHEEP]	66.5	19	2	15	2049	1.43013	405	21.6721	1.38673	405	34.9993	1.71095	405	43.8417	2.11357	405	41.7794	1.91664	405	31.1872	206	23.47	6.20166
B2YKY6	Beta-lactoglobulin (Fragment) OS=Capra hircus GN=BLG PE=4 SV=1 - [B2YKY6_CAPHI]	69.01	4	1	5	1002	0.964697	4	15.5459	1.01394	4	28.2043	0.939258	4	49.4581	1.20485	4	39.0398	1.38755	4	32.0738	71	8.19318	5.09717
P04653	Alpha-S1-casein OS=Ovis aries GN=CSN1S1 PE=1 SV=3 - [CASA1_SHEEP]	67.76	19	2	15	1662	2.96919	20	51.9761	1.28083	20	18.7965	0.776134	20	33.8983	1.40979	20	24.4524	1.0558	20	37.7023	214	24.2904	5.42725
Q8MIH4	Alpha s1 casein OS=Capra hircus GN=csn1S1 PE=4 SV=1 - [Q8MIH4_CAPHI]	50.47	15	1	12	1634	1.43711	1		0.977522	1		0.682144	1		1.0086	1		0.920613	1		214	24.2613	5.41455
E7BQS5	Alpha-s2-casein OS=Ovis aries GN=CSN1S2 PE=2 SV=1 - [E7BQS5_SHEEP]	69.51	13	3	21	1375	2.61859	50	48.1523	2.89899	50	41.2813	2.36687	50	43.2979	5.98112	50	73.1953	3.26732	50	56.8894	223	26.2953	7.86963
P04654	Alpha-S2-casein OS=Ovis aries GN=CSN1S2 PE=2 SV=1 - [CASA2_SHEEP]	67.26	16	1	20	1330	3.4038	2	1.94873	2.03825	2	7.73181	1.98405	2	10.7202	2.97211	2	13.2675	1.73625	2	12.8418	223	26.3153	7.85498
D7NJ85	Beta-casein OS=Bubalus bubalis GN=CSN2 PE=2 SV=2 - [D7NJ85_BUBBU]	25.45	22	2	7	955	1.23075	5	46.1709	1.47225	5	45.5485	1.36166	5	56.1677	1.14501	5	40.2517	1.3012	5	79.1381	224	25.1043	5.35107
Q9TSI0	Beta-casein OS=Bubalus bubalis GN=CSN2 PE=2 SV=1 - [CASB_BUBBU]	25.45	22	1	6	958	1.35723	8	29.9108	3.04587	8	137.555	1.42925	8	47.4745	1.70126	8	47.9609	1.55689	8	60.3247	224	25.0903	5.35107
G5E5H7	Uncharacterized protein OS=Bos taurus GN=PAEP PE=3 SV=1 - [G5E5H7_BOVIN]	57.3	51	3	11	1276	0.804813	71	21.7108	0.827576	71	32.6936	1.2133	71	36.4243	1.56725	71	29.1195	1.61605	71	33.0922	178	19.8983	5.021
E7BQS3	Alpha-s2-casein OS=Ovis aries GN=CSN1S2 PE=2 SV=1 - [E7BQS3_SHEEP]	62.78	16	1	19	1209	1.6764	1		1.58177	1		0.584366	1		1.04088	1		0.702198	1		223	26.3443	8.17725
R4R2H5	Beta-casein (Fragment) OS=Ovis aries PE=4 SV=1 - [R4R2H5_SHEEP]	88.89	4	2	4	625	0.994417	3	15.9464	1.11526	3	0.622145	1.22696	3	2.62005	1.48891	3	2.65345	2.18444	3	19.747	45	4.97483	9.70068
P00712	Alpha-lactalbumin OS=Capra hircus GN=LALBA PE=1 SV=1 - [LALBA_CAPHI]	41.55	9	6	7	437	1.41588	369	22.8918	1.25369	368	22.6723	1.68608	369	26.3941	2.18506	369	30.7027	1.42922	369	20.6159	142	16.244	5.30029
D2SZC1	K-casein (Fragment) OS=Ovis orientalis isphahanica GN=CSN3 PE=4 SV=1 - [D2SZC1_9CETA]	33.33	81	1	6	756	1.09208	87	17.0833	1.03746	87	25.3704	1.35068	87	31.0889	1.48704	87	27.7674	1.81412	87	37.1832	162	17.9744	6.52197
D2SZE3	K-casein (Fragment) OS=Ovis vignei GN=CSN3 PE=4 SV=1 - [D2SZE3_OVIVI]	38.27	125	2	8	749	1.08245	26	23.019	0.919738	26	22.9072	1.1014	26	30.5665	1.17648	26	21.8188	1.47473	26	36.3962	162	18.0138	6.15088
P02669	Kappa-casein OS=Ovis aries GN=CSN3 PE=1 SV=2 - [CASK_SHEEP]	32.29	81	1	6	521	1.07563	1		1.09556	1		2.15176	1		1.78987	1		2.16418	1		192	21.4248	6.16357
D2SZA9	K-casein (Fragment) OS=Ovis orientalis gmelini GN=CSN3 PE=4 SV=1 - [D2SZA9_9CETA]	33.33	87	1	7	535	1.52226	13	25.1577	1.38191	13	34.1263	1.8362	13	19.3903	1.8774	13	38.8346	2.04855	13	39.9581	162	18.0368	6.52197
P14639	Serum albumin OS=Ovis aries GN=ALB PE=1 SV=1 - [ALBU_SHEEP]	57.99	17	20	39	732	0.943547	333	17.6303	1.07521	333	26.714	1.56628	333	24.647	1.12595	333	28.2159	1.23445	333	27.9362	607	69.1433	6.15088
Q69EZ6	CSCN1 OS=Capra hircus PE=2 SV=1 - [Q69EZ6_CAPHI]	39.91	14	1	9	748	3.56977	2	11.2322	1.40567	2	4.50941	0.808507	2	31.8913	1.60527	2	12.2729	1.05926	2	11.9563	213	24.0921	5.14795
D2SZE0	K-casein (Fragment) OS=Ovis vignei cycloceros GN=CSN3 PE=4 SV=1 - [D2SZE0_OVIVI]	35.19	45	1	5	332	1.11655	1		1.25766	1		1.74555	1		1.46853	1		1.41745	1		162	17.9599	5.78271
X2GM95	Serum albumin (Fragment) OS=Cervus nippon PE=2 SV=1 - [X2GM95_CERNI]	27.79	5	2	16	381	0.913569	21	18.2262	0.810442	21	17.8171	1.3018	21	24.5318	1.07747	21	19.9569	0.933651	21	20.0507	583	66.1067	5.66846
W5PH95	Uncharacterized protein (Fragment) OS=Ovis aries PE=4 SV=1 - [W5PH95_SHEEP]	13.58	2	5	6	185	0.339419	181	73.1467	0.269874	181	85.0205	0.350399	181	75.5989	0.305789	181	92.0793	0.311997	181	72.5368	464	50.4284	6.60986
P02769	Serum albumin OS=Bos taurus GN=ALB PE=1 SV=4 - [ALBU_BOVIN]	26.69	7	1	16	302	0.967735	1		1.65191	1		0.793787	1		0.849332	1		1.09996	1		607	69.2484	6.17627
W5PSQ7	Uncharacterized protein OS=Ovis aries PE=4 SV=1 - [W5PSQ7_SHEEP]	32.77	6	7	8	274	0.325117	273	56.0612	0.273145	273	58.0944	0.329364	273	57.2603	0.291584	273	73.6695	0.328223	273	74.933	235	25.1364	6.17627
L8HPF5	Ig gamma-1 chain C region (Fragment) OS=Bos mutus GN=M91_07836 PE=4 SV=1 - [L8HPF5_9CETA]	11.88	1	1	1	122	0.355677	122	51.8196	0.344905	122	72.9124	0.292863	122	53.9133	0.272652	122	78.7342	0.323077	122	75.6894	101	11.3608	6.29053
Q28417	Kappa-casein (Fragment) OS=Giraffa camelopardalis GN=CSN3 PE=2 SV=1 - [CASK_GIRCA]	12.42	27	1	2	306	1.32068	117	30.4067	1.33461	117	43.8645	1.6244	117	39.9123	2.59783	117	50.813	2.47668	117	45.9933	153	17.0849	9.53955
W5PMT0	Uncharacterized protein OS=Ovis aries GN=XDH PE=4 SV=1 - [W5PMT0_SHEEP]	31.08	30	22	37	261	0.89778	177	15.9254	0.80838	177	19.404	0.721559	177	20.5496	0.816455	177	20.2177	0.777516	177	22.1378	1329	146.531	7.79639
W5P9V5	Uncharacterized protein OS=Ovis aries GN=PIGR PE=4 SV=1 - [W5P9V5_SHEEP]	25.45	7	7	14	116	0.761313	81	33.5978	0.71119	81	28.5984	0.796851	81	25.1044	1.11844	81	17.3513	1.01425	81	20.5229	782	85.4237	7.75244
A0SWQ7	Kappa casein (Fragment) OS=Capra hircus GN=CSN3 PE=4 SV=1 - [A0SWQ7_CAPHI]	30.5	109	2	6	347	1.09384	103	21.2302	0.980116	103	18.083	1.19301	103	29.7954	1.26223	103	30.7915	1.48876	103	35.7377	141	15.904	7.89893
W5NXW9	Uncharacterized protein OS=Ovis aries GN=IGHM PE=4 SV=1 - [W5NXW9_SHEEP]	28.95	4	10	10	64	0.583127	64	26.4071	0.450241	64	42.8108	0.387051	64	55.7943	0.395172	64	64.4551	0.416498	64	60.6519	456	49.8654	5.68115
P50420	Kappa-casein OS=Capricornis sumatraensis GN=CSN3 PE=2 SV=1 - [CASK_CAPSU]	28.13	81	1	5	245	1.02118	23	23.4934	1.05624	23	19.6945	1.36465	23	43.4768	1.40847	23	28.096	1.42894	23	36.1654	192	21.4998	5.80811
Q9N258	Kappa-casein (Fragment) OS=Bos taurus x Bos indicus GN=CSN3 PE=4 SV=1 - [Q9N258_9CETA]	15.63	12	1	3	195	1.35384	2	5.77904	1.32143	2	45.4699	1.63945	2	53.0732	2.52054	2	114.903	2.48829	2	105.516	160	17.8521	7.37158
G8FPL3	Kappa-casein (Fragment) OS=Nanger dama GN=KCAS PE=4 SV=1 - [G8FPL3_NANDA]	31.11	12	1	2	190	0.837811	1		3.34885	1		1.34422	1		0.90584	1		0.9003	1		90	10.6504	9.48096
B6CXY7	Kappa casein (Fragment) OS=Bos indicus GN=CSN3 PE=4 SV=1 - [B6CXY7_BOSIN]	26.88	67	1	4	221	1.14361	1		0.897687	1		1.42221	1		1.63269	1		1.89532	1		160	17.8581	7.37158
Q95MX4	Kappa-casein (Fragment) OS=Oreotragus oreotragus PE=4 SV=1 - [Q95MX4_OREOR]	31.11	12	1	2	191	1.21096	2	19.3162	1.54696	2	27.2079	1.53819	2	94.9547	1.23599	2	18.081	1.49419	2	28.7296	90	10.4252	9.12939
A5JSS7	Glycosylation-dependent cell adhesion molecule-1 OS=Capra hircus GN=GLYCAM1 PE=2 SV=1 - [A5JSS7_CAPHI]	30.52	8	6	6	210	1.04188	207	13.7049	0.989269	207	19.9255	1.46227	207	25.5486	2.40483	207	26.2391	2.43236	207	30.623	154	17.015	5.35107
W5NPT7	Uncharacterized protein OS=Ovis aries GN=BTN1A1 PE=4 SV=1 - [W5NPT7_SHEEP]	30.04	45	14	17	155	1.12417	123	18.9404	0.98597	123	19.2062	1.0075	123	24.2615	1.04511	123	31.2834	1.05164	123	29.1185	526	59.1708	5.21143
W5PNP1	Uncharacterized protein OS=Ovis aries GN=MFGE8 PE=4 SV=1 - [W5PNP1_SHEEP]	45.83	9	6	19	118	0.889265	37	18.9353	0.787913	37	31.158	0.716804	37	21.7356	0.843829	37	23.9246	0.845108	37	28.377	432	48.3286	7.31299
A6ZE99	Perilipin OS=Ovis aries GN=ADFP PE=2 SV=1 - [A6ZE99_SHEEP]	43.78	19	7	17	82	1.03771	43	26.5266	0.921659	43	22.5728	0.834237	43	28.5079	0.853077	43	34.9066	0.825426	43	34.2342	450	49.2762	8.03076
A6QNW3	PIGR protein OS=Bos taurus GN=PIGR PE=2 SV=1 - [A6QNW3_BOVIN]	12.02	10	1	8	38	0.873393	3	9.95253	0.750442	3	53.3473	1.0569	3	24.8938	2.12897	3	34.7691	1.86888	3	31.1627	757	82.4552	7.28369
W5PZI1	Clusterin OS=Ovis aries GN=LOC101113728 PE=3 SV=1 - [W5PZI1_SHEEP]	29.16	13	11	11	80	1.0404	80	15.1058	2.36867	80	39.0606	0.898673	80	29.2891	0.977872	80	28.1647	0.921053	80	24.3092	439	50.9842	6.07471
S9Y4T1	Xanthine dehydrogenase/oxidase OS=Camelus ferus GN=CB1_000655011 PE=4 SV=1 - [S9Y4T1_9CETA]	12.7	5	1	16	79	0.847553	3	0.179493	1.29772	3	32.0681	1.15948	3	13.2724	1.12164	3	8.6256	0.998356	3	5.57684	1370	150.099	7.94287
G5CC03	Milk fat globule EGF factor 8 protein (Fragment) OS=Capra hircus PE=2 SV=1 - [G5CC03_CAPHI]	37.44	9	1	14	83	0.918873	2	13.0319	0.517972	2	22.0146	0.499193	2	13.8766	0.583788	2	14.5713	0.562776	2	29.206	398	44.6158	7.48877
A0FI82	Lipoprotein lipase OS=Capra hircus GN=LPL PE=2 SV=1 - [A0FI82_CAPHI]	13.6	24	6	6	34	1.45252	33	27.0316	1.09723	33	19.9727	1.41255	33	22.7548	1.95191	33	26.506	1.76427	33	23.8431	478	53.558	8.36768
Q9XSY9	Osteopontin OS=Ovis aries GN=SPP1 PE=2 SV=1 - [OSTP_SHEEP]	13.31	14	4	4	25	1.95375	25	36.0612	1.83835	25	33.8473	2.53094	25	43.2247	4.87068	25	68.7338	3.71327	25	52.9706	278	31.0335	4.53857
B5B3R8	Alpha S1 casein OS=Bos taurus GN=CSN1S1 PE=2 SV=1 - [B5B3R8_BOVIN]	7.94	3	1	2	48	0.825885	3	11.0476	0.960719	3	8.68469	1.64092	3	13.9048	2.10266	3	13.0884	2.31856	3	7.18567	214	24.4274	5.09717
W5PJR5	Serum amyloid A protein OS=Ovis aries GN=LOC101121216 PE=3 SV=1 - [W5PJR5_SHEEP]	31.29	28	2	5	49	1.24205	34	14.9353	2.15433	34	23.9058	1.13897	34	22.8689	1.66785	34	26.6939	2.3282	34	29.9817	147	15.9439	9.70068
Q2UVX4	Complement C3 OS=Bos taurus GN=C3 PE=1 SV=2 - [CO3_BOVIN]	16.5	11	5	26	83	0.76287	11	30.3506	1.04616	11	23.6855	1.04687	11	16.8432	1.0975	11	11.1028	1.04193	11	19.9673	1661	187.135	6.84424
Q9MZY2	Airway lactoperoxidase OS=Ovis aries PE=1 SV=1 - [Q9MZY2_SHEEP]	21.35	11	15	15	57	1.70067	53	21.8055	1.48648	53	27.2145	2.13312	53	46.2554	1.57493	53	23.1041	1.76262	53	42.4101	712	80.4361	8.68994
P00761	Trypsin OS=Sus scrofa PE=1 SV=1 - [TRYP_PIG]	16.45	3	3	3	47	1.37609	47	20.3902	1.42837	47	21.3976	1.98791	47	36.4861	2.6121	47	43.6738	2.36981	47	37.5067	231	24.3938	7.18115
W5PPQ8	Uncharacterized protein OS=Ovis aries GN=JCHAIN PE=4 SV=1 - [W5PPQ8_SHEEP]	45.91	2	6	6	17	0.574336	17	40.4609	0.572615	17	44.7675	0.632628	17	63.5338	0.614809	17	80.4293	0.778162	17	54.7075	159	18.1321	6.93213
S9XDK9	Complement C3-like protein OS=Camelus ferus GN=CB1_000320023 PE=4 SV=1 - [S9XDK9_9CETA]	4.49	2	1	9	39	0.728376	7	17.3309	0.747498	7	17.608	0.762443	7	13.9248	0.832615	7	9.58537	0.735858	7	28.5371	2360	264.478	7.03467
W5Q5H8	Fibrinogen alpha chain OS=Ovis aries GN=FGA PE=4 SV=1 - [W5Q5H8_SHEEP]	19.09	4	15	15	34	1.6047	34	23.2765	1.89296	34	40.1081	1.75984	34	34.1751	1.28153	34	30.959	1.18809	34	20.0829	812	89.2178	6.26514
L8HKR7	Ig gamma-3 chain C region (Fragment) OS=Bos mutus GN=M91_08147 PE=4 SV=1 - [L8HKR7_9CETA]	8.16	2	1	2	57	0.285896	53	68.8178	0.229086	53	101.041	0.244456	53	76.4164	0.23379	53	88.9587	0.250094	53	88.5172	294	33.2588	7.73779
Q95114	Lactadherin OS=Bos taurus GN=MFGE8 PE=1 SV=2 - [MFGM_BOVIN]	20.14	12	1	9	51	0.940726	4	11.5307	0.957138	4	15.4349	0.754046	4	9.11181	0.922074	4	2.90992	0.946277	4	10.3587	427	47.38	7.15186
Q69B46	Alpha lactalbumin (Fragment) OS=Balaenoptera edeni GN=LALBA PE=3 SV=1 - [Q69B46_BALED]	20.35	20	2	4	81	1.66407	5	19.1452	1.58461	5	43.5417	2.21439	5	76.8595	1.75202	5	23.624	1.40041	5	32.3576	113	12.7932	5.17334
W5Q6U0	Uncharacterized protein OS=Ovis aries GN=FASN PE=4 SV=1 - [W5Q6U0_SHEEP]	11.55	13	5	23	36	0.91143	10	42.065	1.11159	10	60.1217	0.832348	10	57.3707	0.823915	10	38.3611	0.782436	10	26.015	2372	256.571	6.50732
L8I632	Perilipin-2 (Fragment) OS=Bos mutus GN=M91_03563 PE=4 SV=1 - [L8I632_9CETA]	30	20	1	11	40	1.14724	1		0.874911	1		0.909704	1		0.718584	1		0.932241	1		440	48.2528	8.55811
Q06B57	Fatty acid synthase OS=Capra hircus GN=FASN PE=2 SV=2 - [Q06B57_CAPHI]	9.07	12	3	21	29	0.707287	3	2.54715	1.48354	3	10.9835	0.843501	3	15.4399	0.768151	3	16.6004	0.750251	3	18.701	2514	273.676	6.43018
O46544	Complement component C3 (Fragment) OS=Ovis aries GN=C3 PE=2 SV=1 - [O46544_SHEEP]	19.2	6	1	5	14	0.784062	5	13.9117	0.802603	5	13.8904	0.85182	5	3.91797	0.936414	5	6.02799	0.866738	5	15.5862	349	39.6545	6.55127
Q2TJL6	Butyrophilin (Fragment) OS=Bos indicus PE=4 SV=1 - [Q2TJL6_BOSIN]	43.85	7	2	4	25	0.878282	5	3.18111	0.701094	5	8.07964	0.866993	5	11.8601	0.933348	5	37.2564	0.787317	5	2.45417	130	14.1431	5.16064
W5NX51	Uncharacterized protein OS=Ovis aries GN=APOA1 PE=4 SV=1 - [W5NX51_SHEEP]	37.45	12	10	10	35	1.20719	35	14.2996	1.1581	35	14.6825	1.46914	35	20.2205	1.14227	35	30.5952	1.32753	35	35.694	259	29.5135	6.20166
W5P0U4	Uncharacterized protein OS=Ovis aries GN=MUC1 PE=4 SV=1 - [W5P0U4_SHEEP]	4.42	4	3	3	19	1.01419	19	15.937	1.04607	19	16.919	1.15221	19	16.6306	1.30567	19	12.6966	1.21681	19	13.5097	588	58.6119	7.07861
W5PMH6	Uncharacterized protein (Fragment) OS=Ovis aries GN=LCN2 PE=3 SV=1 - [W5PMH6_SHEEP]	34.5	3	6	6	52	1.39527	52	29.0742	1.1524	52	20.9206	1.75333	52	30.0496	2.11869	52	35.8812	2.0724	52	35.9173	200	23.073	9.51025
A4ZVY6	Beta-2-microglobulin OS=Ovis aries PE=2 SV=1 - [A4ZVY6_SHEEP]	24.58	15	3	3	36	1.07612	36	25.641	1.01694	36	20.3125	1.13553	36	26.5772	1.43916	36	40.4578	1.41342	36	34.3024	118	13.6019	6.15088
W5NRI1	Uncharacterized protein OS=Ovis aries GN=LOC101113831 PE=4 SV=1 - [W5NRI1_SHEEP]	22.06	1	3	15	50	0.896208	11	17.3343	1.07009	11	11.2504	1.10511	11	4.39594	1.1731	11	8.09243	1.14472	11	7.47444	680	74.9562	8.63135
S9WUY9	Keratin, type I cytoskeletal 28 OS=Camelus ferus GN=CB1_000879003 PE=3 SV=1 - [S9WUY9_9CETA]	9.08	24	5	6	8	1.72193	6	49.9697	1.1768	6	28.8076	1.49793	6	51.8206	1.62738	6	62.7145	2.17233	6	81.2869	903	98.1531	4.95752
W5PFC9	Uncharacterized protein (Fragment) OS=Ovis aries GN=LOC101117129 PE=4 SV=1 - [W5PFC9_SHEEP]	9.65	23	4	6	14	1.01006	8	19.9772	0.813233	8	16.5527	1.01383	8	14.2569	1.02966	8	11.6807	0.973701	8	16.3163	705	77.8879	6.60986
W5PF65	Uncharacterized protein OS=Ovis aries GN=TF PE=3 SV=1 - [W5PF65_SHEEP]	17.05	23	8	10	23	1.2016	17	15.147	1.25247	17	13.0527	1.32821	17	29.3778	0.923895	17	43.2761	0.695891	17	50.3417	704	77.2905	6.81494
S9Y2X0	Platelet glycoprotein 4 OS=Camelus ferus GN=CB1_001093001 PE=4 SV=1 - [S9Y2X0_9CETA]	2.32	9	1	1	25	0.905034	25	11.4375	0.98415	25	11.8566	1.20057	25	11.4712	1.07823	25	14.2888	1.37032	25	14.822	345	38.399	7.95752
W5NPK5	Uncharacterized protein OS=Ovis aries GN=LOC443475 PE=4 SV=1 - [W5NPK5_SHEEP]	20.37	6	2	11	30	1.07823	4	21.0386	1.13599	4	4.56699	1.21664	4	17.0225	1.29029	4	21.6229	1.49323	4	29.7994	653	73.6313	7.54736
P19120	Heat shock cognate 71 kDa protein OS=Bos taurus GN=HSPA8 PE=1 SV=2 - [HSP7C_BOVIN]	14	29	6	8	11	0.812118	8	17.273	0.790965	8	14.3168	0.811892	8	52.9958	0.777611	8	53.7379	0.721304	8	51.5139	650	71.1964	5.51611
W5PY10	Uncharacterized protein (Fragment) OS=Ovis aries GN=MUC15 PE=4 SV=1 - [W5PY10_SHEEP]	8.77	5	3	3	12	1.49123	12	55.9159	1.69572	12	47.6623	2.07015	12	42.6648	2.69473	12	57.073	2.90642	12	41.98	342	37.2257	5.87158
A2P2I3	VH region (Fragment) OS=Ovis aries GN=VH PE=2 SV=1 - [A2P2I3_SHEEP]	7.04	1	1	1	9	0.522224	9	32.5942	0.650067	9	18.6111	0.540626	9	12.931	0.739068	9	15.3827	0.656451	9	7.0797	142	15.0516	8.77783
W5PID9	Uncharacterized protein OS=Ovis aries GN=C9 PE=4 SV=1 - [W5PID9_SHEEP]	11.68	5	5	5	8	1.52523	8	33.9687	1.28056	8	34.6674	1.4273	8	37.048	1.79126	8	42.2116	1.50524	8	21.3595	548	61.9005	5.99854
W5PZD0	Uncharacterized protein OS=Ovis aries GN=LOC101110099 PE=4 SV=1 - [W5PZD0_SHEEP]	29.73	1	3	3	12	1.12814	12	17.03	1.08213	12	11.9976	1.22057	12	10.6208	2.11581	12	23.2524	2.36068	12	24.6627	111	12.5618	9.12939
A1E0X2	Beta-actin (Fragment) OS=Lagenorhynchus acutus PE=2 SV=1 - [A1E0X2_LAGAC]	23.9	79	7	7	11	0.518109	11	35.6514	0.928345	11	30.2417	0.578216	11	36.3603	0.655314	11	50.8645	0.552546	11	57.5167	364	40.6062	5.85889
W5QHZ5	Uncharacterized protein OS=Ovis aries PE=4 SV=1 - [W5QHZ5_SHEEP]	19.01	1	3	3	22	0.219073	22	40.725	0.178292	22	50.2634	0.190702	22	38.7656	0.231895	22	21.5163	0.175184	22	55.3356	242	26.6444	8.29443
W5P5I0	Uncharacterized protein OS=Ovis aries GN=CFI PE=3 SV=1 - [W5P5I0_SHEEP]	9.23	7	5	5	7	0.856864	6	18.3355	0.867025	6	5.0502	0.676304	6	31.095	0.66661	6	20.6094	0.516057	6	90.0701	607	67.2224	7.69385
W5PLB7	Peptidoglycan-recognition protein OS=Ovis aries GN=PGLYRP1 PE=3 SV=1 - [W5PLB7_SHEEP]	10.73	4	2	2	13	0.494013	13	29.9723	0.411909	13	46.3523	0.26797	13	49.7937	0.253429	13	65.792	0.272566	13	60.2745	205	22.6175	9.31982
W5NUX8	Uncharacterized protein OS=Ovis aries PE=4 SV=1 - [W5NUX8_SHEEP]	3.56	5	3	5	7	1.3198	4	2.18818	1.35345	4	7.79595	1.35343	4	20.0933	1.33047	4	25.3296	0.933128	4	38.3046	1544	169.263	8.29443
T0MKA5	Erythrocyte band 7 integral membrane protein-like protein OS=Camelus ferus GN=CB1_001603004 PE=4 SV=1 - [T0MKA5_9CETA]	19.52	7	3	3	6	0.662525	6	10.7482	0.688531	6	11.3213	0.579105	6	22.7245	0.617967	6	23.6543	0.574122	6	5.128	210	23.0581	5.46533
W5PTS4	Uncharacterized protein OS=Ovis aries GN=RNASE4 PE=3 SV=1 - [W5PTS4_SHEEP]	33.33	7	3	3	8	1.40312	8	14.4888	1.51315	8	35.4965	1.97983	8	23.4338	2.08561	8	43.7543	2.41507	8	51.4398	147	16.8413	9.01221
G5E604	Uncharacterized protein (Fragment) OS=Bos taurus PE=1 SV=1 - [G5E604_BOVIN]	13.08	1	1	1	7	0.3269	7	25.2081	0.199234	7	14.2808	0.229077	7	25.2208	0.206726	7	30.6067	0.222167	7	30.2718	107	11.0513	7.98682
S5FR89	Cathepsin B OS=Ovis aries GN=CTSB PE=2 SV=1 - [S5FR89_SHEEP]	7.76	3	2	2	5	0.96341	5	22.2952	0.918634	5	75.9101	0.771009	5	32.867	0.863269	5	49.7226	0.920009	5	39.7255	335	36.7572	6.02393
C6ZP46	I alpha globin OS=Ammotragus lervia GN=HBAI PE=3 SV=1 - [C6ZP46_AMMLE]	20.42	54	3	3	5	1.69622	3	36.0356	0.38033	3	141.776	0.421527	3	35.2342	0.535124	3	40.8595	0.749072	3	41.7403	142	15.1689	8.67529
Q1RMN8	Immunoglobulin light chain, lambda gene cluster OS=Bos taurus GN=IGL@ PE=2 SV=1 - [Q1RMN8_BOVIN]	9.4	5	1	2	7	0.412342	6	22.6458	0.282994	6	34.7225	0.354388	6	45.2385	0.404139	6	32.4509	0.365475	6	52.1646	234	24.521	7.62061
P84482	Fibrinogen alpha chain (Fragment) OS=Ammotragus lervia GN=FGA PE=1 SV=1 - [FIBA_AMMLE]	100	1	1	1	2	0.912647	2	37.5842	2.23078	2	11.429	1.45475	2	28.0905	0.931219	2	36.3774	0.754067	2	174.502	19	1.84683	3.95459
C0LSL0	Heart fatty acid-binding protein OS=Bos taurus GN=H-FABP PE=2 SV=1 - [C0LSL0_BOVIN]	38.35	37	6	6	21	1.22186	19	18.1575	1.92539	19	27.3104	1.44403	19	15.5663	1.49641	19	25.2797	1.52484	19	42.1659	133	14.7836	7.34229
I1WXR3	Alpha-1-antitrypsin transcript variant 1 OS=Ovis aries GN=SERPINA1 PE=2 SV=1 - [I1WXR3_SHEEP]	10.34	7	5	5	16	0.927622	16	10.7972	1.00302	16	25.1122	1.22183	16	22.7439	1.17307	16	21.5613	1.05244	16	19.1028	416	45.9977	6.20166
Q7M2U8	Apolipoprotein E OS=Ovis aries GN=APOE PE=2 SV=1 - [APOE_SHEEP]	15.51	8	3	4	5	0.611732	4	17.4245	0.652914	4	94.0049	0.305389	4	25.0354	0.251238	4	27.4972	0.265007	4	36.3885	316	36.1927	5.68115
W5Q5A6	Uncharacterized protein OS=Ovis aries GN=FGG PE=4 SV=1 - [W5Q5A6_SHEEP]	8.29	7	4	4	11	1.82716	11	17.2078	2.633	11	23.627	2.34907	11	47.2205	1.26348	11	32.169	1.15107	11	41.8932	434	49.2477	6.12549
W5NWM2	Uncharacterized protein OS=Ovis aries GN=APOA4 PE=4 SV=1 - [W5NWM2_SHEEP]	23.78	5	4	8	12	0.86666	6	31.2468	0.888852	6	21.1587	1.16662	6	29.8209	1.04263	6	24.2276	0.944535	6	32.4281	370	41.4545	5.75732
W5PTG9	Uncharacterized protein OS=Ovis aries GN=GC PE=4 SV=1 - [W5PTG9_SHEEP]	18.74	9	7	7	14	0.804444	14	40.572	0.822716	14	26.0626	1.09382	14	14.0109	0.877434	14	17.3652	0.847299	14	53.8576	475	53.17	5.42725
A7E3V7	Guanine nucleotide-binding protein, beta-1 subunit (Fragment) OS=Bos taurus GN=GNB1 PE=2 SV=1 - [A7E3V7_BOVIN]	3.56	4	1	1	3	0.67369	3	8.52457	0.674349	3	10.6748	0.762232	3	8.48149	0.757772	3	2.57255	0.62732	3	7.27197	337	37.0059	6.17627
W5PTZ8	Uncharacterized protein OS=Ovis aries GN=LOC101114959 PE=3 SV=1 - [W5PTZ8_SHEEP]	29.25	1	4	4	11	1.36696	11	23.3713	1.57589	11	30.9038	1.51626	11	29.0976	1.64374	11	50.5213	2.24838	11	50.3142	147	17.0255	9.37842
W5PU70	Uncharacterized protein OS=Ovis aries GN=MUC16 PE=4 SV=1 - [W5PU70_SHEEP]	0.82	4	3	3	4	1.35953	4	32.9801	1.80223	4	20.8158	1.91984	4	10.9169	1.94661	4	8.89293	2.39095	4	4.4279	4781	503.155	5.49072
P19035	Apolipoprotein C-III OS=Bos taurus GN=APOC3 PE=1 SV=2 - [APOC3_BOVIN]	16.67	3	1	1	2	0.657522	2	9.80646	0.960234	2	86.9973	0.775882	2	11.5725	0.621791	2	10.5614	0.667667	2	16.6888	96	10.6854	5.10986
P42819	Serum amyloid A protein OS=Ovis aries GN=SAA1 PE=1 SV=1 - [SAA_SHEEP]	26.79	6	1	3	17	1.5602	7	17.2106	1.21513	7	38.3044	0.906588	7	10.3199	1.22574	7	6.41314	1.17976	7	42.7719	112	12.6801	6.56592
Q29411	Chitinase-3-like protein 1 OS=Sus scrofa GN=CHI3L1 PE=1 SV=2 - [CH3L1_PIG]	6.27	6	2	2	5	0.447149	5	31.7779	1.17741	5	26.7221	0.279138	5	65.7854	0.285649	5	17.2859	0.416851	5	26.9219	383	42.7727	8.80713
E9NRZ3	Beta-1,4-galactosyltransferase I OS=Capra hircus GN=B4GALT1 PE=2 SV=1 - [E9NRZ3_CAPHI]	21.14	8	4	8	14	0.859894	8	26.8094	0.872868	8	15.7788	1.01754	8	16.781	1.02174	8	28.2892	1.06759	8	35.3915	402	44.7299	9.0708
W5QHS2	Matrix Gla protein OS=Ovis aries GN=MGP PE=3 SV=1 - [W5QHS2_SHEEP]	23.3	4	2	2	8	0.835083	8	29.5176	0.60509	8	25.2041	0.328522	8	58.2348	0.485738	8	13.0375	0.422036	8	26.2889	103	12.2232	9.14404
G3N2D7	Uncharacterized protein OS=Bos taurus GN=IGLL1 PE=4 SV=1 - [G3N2D7_BOVIN]	12.93	1	1	1	3	0.315781	3	35.7031	0.261173	3	16.6538	0.284704	3	48.8146	0.252477	3	6.44181	0.177332	3	13.947	116	12.1048	4.77979
W5PSD8	Uncharacterized protein OS=Ovis aries GN=GP2 PE=4 SV=1 - [W5PSD8_SHEEP]	10.13	5	5	5	10	1.2766	10	9.26893	1.07545	10	17.3799	1.16987	10	29.5936	0.97673	10	34.6784	0.900983	10	16.8363	533	58.9942	4.85596
F1MVS9	Uncharacterized protein OS=Bos taurus GN=MASP1 PE=3 SV=1 - [F1MVS9_BOVIN]	8.79	12	7	7	14	0.963143	14	10.7261	0.956956	14	22.0891	1.07782	14	19.8069	1.13922	14	23.3744	1.40601	14	16.8533	728	81.2464	5.14795
Q864L8	Peptidyl-prolyl cis-trans isomerase (Fragment) OS=Ovis aries PE=2 SV=1 - [Q864L8_SHEEP]	30.36	28	3	3	5	0.86828	5	16.0602	1.07424	5	17.4406	0.774451	5	30.9005	0.675964	5	31.1536	0.64039	5	34.6349	112	12.1769	8.30908
Q9XSC0	Beta-lactoglobulin C (Fragment) OS=Ovis aries GN=LGB PE=4 SV=1 - [Q9XSC0_SHEEP]	77.78	1	1	1	17	1.13467	17	26.159	1.35694	17	59.3746	1.34363	17	20.2653	3.32526	17	29.6501	1.59349	17	26.1357	27	3.04857	7.34229
Q9XT27	Ceruloplasmin OS=Ovis aries GN=CP PE=2 SV=1 - [CERU_SHEEP]	5.06	8	4	4	4	1.14022	4	15.0661	1.0612	4	14.0211	1.22231	4	36.7556	0.916596	4	30.8612	0.901789	4	17.6651	1048	119.05	5.80811
W5PJZ2	Uncharacterized protein OS=Ovis aries GN=SERPING1 PE=3 SV=1 - [W5PJZ2_SHEEP]	6.88	5	3	3	4	0.83181	4	3.03842	0.94265	4	24.853	1.72314	4	37.2127	1.30709	4	33.6071	0.937329	4	39.163	509	55.6626	6.82959
W5PCT4	Uncharacterized protein OS=Ovis aries GN=SLC34A2 PE=4 SV=1 - [W5PCT4_SHEEP]	3.34	9	3	3	10	0.961107	10	5.6515	0.898324	10	6.14123	0.955212	10	9.54301	1.0427	10	20.0207	0.76952	10	33.2745	749	81.6557	7.94287
C8BKD1	Prothrombin OS=Ovis aries GN=F2 PE=2 SV=1 - [C8BKD1_SHEEP]	6.26	3	3	3	4	0.805275	4	13.1748	0.729241	4	48.8471	0.853791	4	29.4373	0.688922	4	0.223161	0.568829	4	12.4405	623	70.0045	6.60986
W5PGE9	Uncharacterized protein (Fragment) OS=Ovis aries PE=4 SV=1 - [W5PGE9_SHEEP]	6.53	1	2	3	20	0.663381	18	53.8329	0.713878	18	53.513	0.648044	18	28.8745	0.618925	18	22.7826	0.717276	18	15.6451	352	37.7128	5.21143
E1BED8	Elongation factor 1-alpha (Fragment) OS=Bos taurus PE=3 SV=2 - [E1BED8_BOVIN]	7.9	41	4	4	5	0.623155	5	20.3891	1.09943	5	20.0363	0.576842	5	14.7208	0.355852	5	8.75321	0.498699	5	17.2957	443	47.9158	8.5874
W5PD71	Pentaxin OS=Ovis aries GN=CRP PE=3 SV=1 - [W5PD71_SHEEP]	16.07	2	3	3	3	1.09062	3	6.09563	0.8908	3	1.34263	0.606755	3	63.7442	0.693698	3	59.0641	0.690896	3	53.6042	224	25.2588	6.771
Q30DP5	Trefoil factor 3 (Fragment) OS=Ovis aries GN=TFF3 PE=2 SV=1 - [Q30DP5_SHEEP]	36.36	4	1	1	3	1.58581	3	2.76943	1.20269	3	61.6831	0.842676	3	23.9289	1.10443	3	30.5575	0.659703	3	1.77318	44	4.65499	4.61475
W5PCL4	Uncharacterized protein OS=Ovis aries GN=ACSL1 PE=4 SV=1 - [W5PCL4_SHEEP]	5.72	5	4	4	4	1.1488	4	34.356	1.09779	4	27.7696	1.00323	4	29.4063	1.51033	4	2.45863	1.30502	4	7.39376	734	81.8701	7.63525
Q7M323	Plasminogen (Fragment) OS=Capra hircus GN=PLG PE=1 SV=1 - [PLMN_CAPHI]	21.95	1	1	2	2	1	1		0.834338	1		0.970658	1		0.86561	1		0.90639	1		123	13.8994	6.72705
W5PWM0	Uncharacterized protein OS=Ovis aries PE=4 SV=1 - [W5PWM0_SHEEP]	4.77	7	3	3	7	0.79989	7	19.2411	0.612541	7	26.3793	0.566351	7	24.8358	0.626014	7	17.4311	0.582858	7	68.5908	503	53.7236	7.50342
P18203	Peptidyl-prolyl cis-trans isomerase FKBP1A OS=Bos taurus GN=FKBP1A PE=1 SV=2 - [FKB1A_BOVIN]	25	8	2	2	2	1.51349	2	50.5085	1.46067	2	33.3346	0.887631	2	4.06748	0.755316	2	22.2793	0.778393	2	22.8366	108	11.9021	8.14795
A0A088QFM6	Heat shock protein 90kDa alpha OS=Bos mutus grunniens PE=2 SV=1 - [A0A088QFM6_BOSMU]	4.57	30	3	3	3	0.558952	2	6.85492	0.999666	2	8.2202	0.664907	2	25.3759	0.426262	2	17.5386	0.50577	2	35.991	722	83.3111	5.05908
P61585	Transforming protein RhoA OS=Bos taurus GN=RHOA PE=1 SV=1 - [RHOA_BOVIN]	14.51	12	2	2	3	0.789589	3	3.65901	1.05528	3	22.1814	0.807007	3	27.7644	1.09092	3	0.262165	0.957428	3	10.8311	193	21.7541	6.1001
W5Q0X5	Uncharacterized protein OS=Ovis aries GN=LOC101115576 PE=3 SV=1 - [W5Q0X5_SHEEP]	14.34	20	1	4	11	1.56152	2	40.6952	1.49135	2	12.8189	1.48539	2	8.06582	1.20319	2	26.7742	1.26623	2	38.1579	279	31.7686	5.94775
W5Q124	Uncharacterized protein OS=Ovis aries GN=LOC101119509 PE=3 SV=1 - [W5Q124_SHEEP]	7.91	20	1	4	11	1.6513	2	10.5163	1.904	2	0.828812	1.73704	2	2.65176	1.25783	2	4.04728	1.18546	2	13.5975	417	46.5723	5.73193
W5P256	Uncharacterized protein OS=Ovis aries GN=FOLR1 PE=4 SV=1 - [W5P256_SHEEP]	7.39	3	2	2	6	0.773153	6	11.41	0.833309	6	8.98249	0.593873	6	10.1569	0.620383	6	21.7297	0.575233	6	21.0383	257	29.8293	7.48877
A6QPX7	FGB protein (Fragment) OS=Bos taurus GN=FGB PE=2 SV=1 - [A6QPX7_BOVIN]	19.39	9	6	6	13	1.73229	13	15.0888	1.96923	13	19.1637	1.97533	13	25.4601	1.28169	13	20.8193	1.08735	13	23.1007	330	37.9071	6.68311
K8FK38	Heat Shock Protein 70 (Fragment) OS=Bos taurus GN=HSP70 PE=3 SV=1 - [K8FK38_BOVIN]	6.78	64	2	4	5	0.864575	2	24.576	1.01881	2	9.67238	0.742442	2	9.79288	0.6934	2	21.347	0.646069	2	19.9235	634	69.3779	6.59521
W5NSH8	Uncharacterized protein OS=Ovis aries GN=NPC2 PE=4 SV=1 - [W5NSH8_SHEEP]	15.44	4	2	2	4	0.89765	4	14.2649	0.796813	4	15.1182	0.882793	4	26.5638	1.14706	4	18.2869	0.971203	4	12.963	149	16.4314	7.98682
W5NRG7	Uncharacterized protein OS=Ovis aries GN=ITIH4 PE=4 SV=1 - [W5NRG7_SHEEP]	5.89	9	5	5	6	1.77044	5	20.4686	1.76815	5	9.28992	0.813755	5	41.2049	0.768003	5	25.095	0.69848	5	1.14856	917	101.751	6.40479
W5P3R3	Plasminogen OS=Ovis aries GN=LPA PE=3 SV=1 - [W5P3R3_SHEEP]	9.68	13	6	7	12	0.901584	9	21.4727	0.914355	9	14.0806	1.12037	9	14.6331	0.871613	9	22.0288	0.873088	9	12.8668	816	91.1215	7.26904
W5P559	Uncharacterized protein OS=Ovis aries GN=OBP2B PE=4 SV=1 - [W5P559_SHEEP]	25.17	1	2	3	4	1.38289	3	15.1204	1.17303	3	0.0183342	1.04205	3	10.4604	4.07164	3	16.3569	1.33196	3	13.6821	143	15.4421	8.89502
A2AXH8	Alpha-1 acid glycoprotein (Fragment) OS=Capra hircus GN=AGP PE=2 SV=1 - [A2AXH8_CAPHI]	13.94	9	3	3	7	1.74106	7	12.4533	2.10796	7	7.85409	1.92782	7	10.4161	0.868665	7	5.60896	0.851363	7	20.5646	165	19.1734	5.61768
L8HQV0	Dehydrogenase/reductase SDR family member 1 OS=Bos mutus GN=M91_13225 PE=4 SV=1 - [L8HQV0_9CETA]	18.27	5	5	5	5	0.910428	5	34.2463	0.627303	5	13.8008	0.608281	5	9.88217	0.605933	5	10.7152	0.637702	5	22.5257	312	34.0013	8.36768
F1MX50	Uncharacterized protein OS=Bos taurus GN=CREG1 PE=4 SV=1 - [F1MX50_BOVIN]	8.14	5	2	2	2	1.45545	2	7.25667	1.40019	2	6.46713	1.27951	2	23.744	1.05861	2	2.63367	1.16003	2	3.52123	221	23.9432	7.34229
F1RIP6	Uncharacterized protein OS=Sus scrofa GN=NUCB1 PE=1 SV=2 - [F1RIP6_PIG]	17.94	6	7	7	9	0.928239	9	32.6776	0.73374	9	38.4491	0.944244	9	25.6279	0.995216	9	17.6137	0.872002	9	23.4564	457	53.1698	5.10986
W5QAB1	Uncharacterized protein OS=Ovis aries GN=HPX PE=4 SV=1 - [W5QAB1_SHEEP]	10.87	3	6	6	12	1.0867	12	26.6465	1.31305	12	26.9242	1.39909	12	36.5993	0.705484	12	17.2589	0.632963	12	12.5196	460	51.8996	7.02002
A5PK49	IGL@ protein OS=Bos taurus GN=IGL@ PE=2 SV=1 - [A5PK49_BOVIN]	6.84	7	1	2	6	0.349616	5	17.225	0.286504	5	38.311	0.336885	5	24.9039	0.393334	5	29.3388	0.395762	5	24.2986	234	24.5772	7.62061
F1N3Q7	Apolipoprotein A-IV OS=Bos taurus GN=APOA4 PE=4 SV=1 - [F1N3Q7_BOVIN]	12.89	7	1	5	7	0.716709	1		0.458811	1		0.549734	1		0.510927	1		0.59396	1		380	42.9634	5.40186
Q69B57	Alpha lactalbumin (Fragment) OS=Balaenoptera physalus GN=LALBA PE=3 SV=1 - [Q69B57_BALPH]	20.91	19	1	2	6	1.50789	4	13.147	1.2099	4	21.6839	1.85351	4	35.5172	2.42326	4	26.4914	1.96205	4	7.2011	110	12.48	5.021
W5PZJ1	Uncharacterized protein OS=Ovis aries GN=SCGB2A2 PE=4 SV=1 - [W5PZJ1_SHEEP]	28.57	2	2	2	5	1.04057	5	1.83996	1.037	5	26.1514	1.2056	5	15.3467	2.00063	5	33.9434	2.64405	5	48.4466	84	9.41774	4.65283
W5P1C2	Uncharacterized protein OS=Ovis aries GN=NUCB2 PE=4 SV=1 - [W5P1C2_SHEEP]	6.58	5	3	3	3	1.43025	3	5.32353	1.13328	3	29.6854	1.30745	3	0.970986	1.69012	3	8.67793	1.76335	3	50.095	441	52.4374	5.14795
L8J3H9	14-3-3 protein zeta/delta (Fragment) OS=Bos mutus GN=M91_19634 PE=4 SV=1 - [L8J3H9_9CETA]	10.43	43	1	2	3	0.616878	1		0.896541	1		0.574276	1		0.418384	1		0.440234	1		230	26.1672	5.05908
L8I0I4	Palmitoyl-protein thioesterase 1 (Fragment) OS=Bos mutus GN=M91_08520 PE=4 SV=1 - [L8I0I4_9CETA]	5.64	6	1	1	1	0.707912	1		0.456618	1		0.582281	1		0.594917	1		0.570989	1		266	29.9942	6.85889
E1BH06	Uncharacterized protein OS=Bos taurus GN=C4A PE=1 SV=2 - [E1BH06_BOVIN]	2.13	3	2	4	5	0.813858	2	12.67	1.16035	2	15.1594	1.22937	2	13.6832	1.20398	2	20.3613	0.736887	2	41.9275	1741	192.644	7.43018
S9Y209	Selenoprotein OS=Camelus ferus GN=CB1_001121006 PE=4 SV=1 - [S9Y209_9CETA]	15.32	8	2	2	2	0.843685	2	3.56949	0.804892	2	14.6658	0.886189	2	24.6814	1.054	2	34.6428	1.08196	2	33.6836	124	13.6267	4.55127
A5A758	Keratin 1 (Fragment) OS=Sus scrofa GN=KRT1 PE=2 SV=1 - [A5A758_PIG]	5.72	21	2	4	8	1.03346	3	5.67233	0.611191	3	2.01679	0.93683	3	3.17213	1.04123	3	7.19512	1.46664	3	6.98784	629	65.1589	8.14795
L8I3C7	Uncharacterized protein (Fragment) OS=Bos mutus GN=M91_00905 PE=3 SV=1 - [L8I3C7_9CETA]	23.15	6	2	2	2	0.91981	2	45.2458	1.11797	2	4.06426	0.871973	2	14.0604	0.863134	2	12.5774	0.814945	2	19.2856	108	12.0463	9.46631
W5P0Q4	Uncharacterized protein OS=Ovis aries GN=LOC101102413 PE=3 SV=1 - [W5P0Q4_SHEEP]	11.54	13	2	4	5	2.9063	3	4.40031	2.62546	3	8.92161	1.93757	3	8.41719	0.959902	3	0.443296	0.669064	3	10.861	416	46.2164	8.29443
Q865C5	Ubiquitin OS=Camelus dromedarius PE=3 SV=2 - [UBIQ_CAMDR]	32.89	26	2	2	6	0.645896	6	10.1795	0.638703	6	5.30418	0.67241	6	18.003	0.658601	6	18.4335	0.69603	6	45.4471	76	8.55962	7.25439
E1BGX8	Uncharacterized protein OS=Bos taurus GN=HHIPL2 PE=4 SV=1 - [E1BGX8_BOVIN]	4.7	9	3	3	4	1.2974	4	12.2569	1.71662	4	24.2027	1.33216	4	10.1953	1.28674	4	34.3174	1.27427	4	35.8248	724	81.1271	9.31982
I3LGQ1	Uncharacterized protein (Fragment) OS=Sus scrofa PE=1 SV=1 - [I3LGQ1_PIG]	5.22	5	1	1	1	0.808619	1		0.520294	1		0.345133	1		0.312013	1		0.223799	1		249	28.6249	5.90967
Q9XSQ2	Surfactant protein D (Fragment) OS=Ovis aries GN=sp-D PE=2 SV=1 - [Q9XSQ2_SHEEP]	36.63	5	2	2	2	1.29977	2	11.9925	1.12379	2	12.4769	1.41979	2	11.9148	1.50506	2	14.5197	1.66123	2	27.6037	101	10.8642	4.88135
L8I2N6	Synaptosomal-associated protein (Fragment) OS=Bos mutus GN=M91_00958 PE=3 SV=1 - [L8I2N6_9CETA]	15.57	4	2	2	2	0.832144	2	22.5134	0.651899	2	56.658	0.645232	2	81.8092	0.60535	2	95.9561	0.569638	2	88.1258	167	18.1898	4.729
A0N0S6	Kappa-casein (Fragment) OS=Bubalus bubalis PE=4 SV=1 - [A0N0S6_BUBBU]	12.12	2	1	1	7	0.549243	7	14.6543	0.628943	7	20.4982	0.711611	7	24.0103	0.804884	7	34.3859	0.957382	7	28.6122	66	6.98454	4.14502
F1SE74	Uncharacterized protein OS=Sus scrofa GN=B4GALT1 PE=1 SV=1 - [F1SE74_PIG]	12.72	3	1	5	7	1.37493	1		0.879777	1		0.782461	1		0.673264	1		0.864443	1		401	44.3034	8.6167
W5NRH2	Uncharacterized protein OS=Ovis aries GN=LOC101103133 PE=4 SV=1 - [W5NRH2_SHEEP]	21.43	1	2	3	10	0.939101	4	27.2459	0.923104	4	8.24617	0.890627	4	6.43128	0.854308	4	29.6457	0.989145	4	29.6353	126	14.6482	6.97607
L8I2G1	Cell division control protein 42-like protein (Fragment) OS=Bos mutus GN=M91_02258 PE=3 SV=1 - [L8I2G1_9CETA]	5.88	8	1	1	2	0.601761	2	20.2683	0.562001	2	2.82201	0.585508	2	7.72673	0.520266	2	7.49481	0.576945	2	1.70793	170	18.986	6.02393
W5P8F9	Uncharacterized protein OS=Ovis aries PE=4 SV=1 - [W5P8F9_SHEEP]	14.96	1	2	2	4	0.942924	4	10.1349	0.882303	4	14.3178	1.15107	4	22.5229	1.18269	4	9.54655	1.00997	4	12.549	254	28.1301	4.98291
F5CV66	Glucose regulated protein 78 (Fragment) OS=Camelus dromedarius PE=2 SV=1 - [F5CV66_CAMDR]	9.14	31	2	3	4	0.91085	3	32.5763	0.739172	3	4.18855	0.549627	3	9.14105	0.564252	3	9.25239	0.649806	3	10.9978	405	44.6262	6.1001
Q5TIK9	Putative cyclophilin B (Fragment) OS=Ovis aries GN=cyclophilin B PE=2 SV=1 - [Q5TIK9_SHEEP]	17.7	11	2	2	4	1.02261	4	11.1568	0.728119	4	8.28125	0.826169	4	5.32662	1.08414	4	15.9933	0.856524	4	24.811	113	12.4503	8.11865
W5Q9A2	Uncharacterized protein (Fragment) OS=Ovis aries GN=AZGP1 PE=3 SV=1 - [W5Q9A2_SHEEP]	8.31	1	2	2	2	1.09981	2	15.0188	0.748319	2	17.3121	0.843449	2	18.4764	0.643241	2	9.22694	0.787678	2	23.4979	313	35.3945	6.02393
Q3SZI4	14-3-3 protein theta OS=Bos taurus GN=YWHAQ PE=2 SV=1 - [1433T_BOVIN]	9.8	39	1	2	3	0.607593	1		0.744877	1		0.489485	1		0.471164	1		0.421916	1		245	27.7468	4.77979
W5PQH0	Uncharacterized protein OS=Ovis aries GN=ANPEP PE=4 SV=1 - [W5PQH0_SHEEP]	2.35	3	2	2	2	0.648042	2	2.98509	0.412405	2	4.77444	0.328369	2	4.03576	0.288531	2	24.8801	0.458562	2	12.3857	936	105.997	5.50342
T0MIA6	Gelsolin isoform 32 OS=Camelus ferus GN=CB1_001603005 PE=4 SV=1 - [T0MIA6_9CETA]	6.51	8	5	5	5	1.35613	4	50.4885	1.00626	4	44.3054	1.53534	4	32.9687	1.63783	4	18.6424	1.67049	4	3.04158	707	77.7541	6.62451
W5PSP9	Uncharacterized protein (Fragment) OS=Ovis aries PE=4 SV=1 - [W5PSP9_SHEEP]	12.6	4	2	2	10	0.42821	10	70.2275	0.301496	10	58.7034	0.418284	10	33.7315	0.289742	10	47.5153	0.396452	10	39.7133	127	12.9723	7.97217
L8I378	DnaJ-like protein subfamily C member 3 (Fragment) OS=Bos mutus GN=M91_06952 PE=4 SV=1 - [L8I378_9CETA]	3.56	6	2	2	3	0.927149	3	37.8714	0.85804	3	14.3142	0.79751	3	15.0027	0.906177	3	20.7308	1.22408	3	37.6862	477	54.7767	5.92236
W5PMM7	Protein disulfide-isomerase (Fragment) OS=Ovis aries GN=PDIA3 PE=3 SV=1 - [W5PMM7_SHEEP]	8.24	5	4	4	4	0.581418	4	35.1578	0.56896	4	24.8436	0.395865	4	35.4237	0.448516	4	51.5884	0.462808	4	63.2653	449	50.8777	6.99072
A1L555	Prosaposin OS=Bos taurus GN=PSAP PE=2 SV=1 - [A1L555_BOVIN]	3.24	6	2	2	8	1.02169	8	21.2871	0.802349	8	22.0614	1.07909	8	11.7415	1	8	18.0763	1.2266	8	16.4009	525	58.1288	5.24951
Q7M2Q9	Rho protein GDP-dissociation inhibitor (Fragments) OS=Bos taurus PE=1 SV=1 - [Q7M2Q9_BOVIN]	22.22	5	1	1	1	1.54474	1		1.39356	1		1.16275	1		1.3456	1		1.76443	1		72	8.07298	4.53857
L8IR26	Folate receptor alpha OS=Bos mutus GN=M91_03529 PE=4 SV=1 - [L8IR26_9CETA]	6.22	3	2	2	7	1.05203	7	8.89963	1.18088	7	20.5191	1.02688	7	15.703	1.01027	7	15.5335	0.779667	7	5.57021	241	27.8851	7.86963
B6D985	Haptoglobin OS=Cervus elaphus GN=HP PE=2 SV=1 - [HPT_CEREL]	6.75	12	1	3	4	1.93783	2	47.7312	2.57739	2	52.1521	1.22664	2	10.4009	0.756072	2	21.3397	0.589793	2	31.4161	400	44.6615	7.56201
F1RRD6	Uncharacterized protein OS=Sus scrofa GN=PDCD6IP PE=1 SV=2 - [F1RRD6_PIG]	1.68	4	1	1	1	0.789969	1		0.681081	1		0.655169	1		0.650525	1		0.587621	1		772	85.1975	6.16357
O97719	Alpha lactalbumin (Fragment) OS=Megaptera novaeangliae GN=LALBA PE=3 SV=1 - [O97719_MEGNO]	8.99	2	1	1	1	1.77702	1		1.26253	1		1.80523	1		1.44767	1		1.15395	1		89	10.0917	4.80518
E3VL24	Angiopoietin-like protein 4 (Fragment) OS=Capra hircus PE=2 SV=1 - [E3VL24_CAPHI]	3.85	2	1	1	1	0.664805	1		0.581149	1		0.667245	1		0.783182	1		0.874721	1		286	32.5954	9.37842
Q2KJF1	Alpha-1B-glycoprotein OS=Bos taurus GN=A1BG PE=1 SV=1 - [A1BG_BOVIN]	8.95	2	4	4	4	0.924292	4	2.76628	1.1482	4	4.24475	1.27319	4	6.56713	0.912628	4	15.9431	0.983019	4	17.1478	503	53.5203	5.42725
W5Q5W1	Uncharacterized protein OS=Ovis aries GN=SIL1 PE=4 SV=1 - [W5Q5W1_SHEEP]	2.36	1	1	1	1	0.941554	1		0.813672	1		0.823129	1		0.814608	1		0.850122	1		467	53.0634	5.66846
O46375	Transthyretin OS=Bos taurus GN=TTR PE=1 SV=1 - [TTHY_BOVIN]	6.8	3	1	1	1	0.45842	1		0.481213	1		0.416503	1		0.481242	1		0.466779	1		147	15.717	6.30322
L8HNW4	Ig lambda chain V-II region MGC (Fragment) OS=Bos mutus GN=M91_02599 PE=4 SV=1 - [L8HNW4_9CETA]	5.93	1	1	1	5	0.446094	5	42.1591	0.323122	5	11.732	0.287398	5	11.8522	0.337841	5	20.1968	0.455881	5	9.58928	135	13.9398	7.95752
D6PZY4	Factor H (Fragment) OS=Ovis aries GN=fH PE=2 SV=1 - [D6PZY4_SHEEP]	6.3	6	6	6	7	1.00705	7	34.2932	1.08817	7	13.9968	1.2724	7	11.0531	1.10071	7	8.06541	0.926621	7	28.5031	1111	125.295	6.7124
Q6PT94	Transketolase (Fragment) OS=Bos taurus GN=TKT PE=4 SV=1 - [Q6PT94_BOVIN]	10.47	9	1	1	2	0.614075	2	0.6844	0.918797	2	1.34302	0.702365	2	9.88059	0.544009	2	20.4595	0.705442	2	2.67468	86	9.55077	5.87158
P68117	Fibrinogen beta chain (Fragment) OS=Capra hircus GN=FGB PE=1 SV=1 - [FIBB_CAPHI]	60	1	1	1	2	1.00281	2	64.6567	2.02022	2	82.0836	1.78329	2	86.3385	1.53579	2	55.2156	1.06094	2	29.5023	20	2.33712	4.43701
W5QI15	Uncharacterized protein OS=Ovis aries PE=4 SV=1 - [W5QI15_SHEEP]	11.72	1	1	1	2	0.522031	2	115.313	0.301471	2	105.3	0.275652	2	68.188	0.315693	2	32.8733	0.214796	2	81.4736	128	13.9491	9.29053
L8J0I1	Renin receptor (Fragment) OS=Bos mutus GN=M91_17207 PE=4 SV=1 - [L8J0I1_9CETA]	2.37	5	1	1	2	0.623632	2	8.60779	0.803358	2	28.0012	0.772716	2	27.0441	0.769089	2	50.6463	1.14662	2	29.3584	337	37.9616	5.70654
W5PFL8	Tetraspanin (Fragment) OS=Ovis aries GN=CD9 PE=3 SV=1 - [W5PFL8_SHEEP]	8.22	3	2	2	3	0.66853	3	27.0581	0.707884	3	5.94534	0.7151	3	12.1259	0.762872	3	7.26685	0.785436	3	21.2739	219	24.2623	5.37646
W5NSA6	Uncharacterized protein OS=Ovis aries GN=A2M PE=4 SV=1 - [W5NSA6_SHEEP]	3.52	10	5	5	5	1.30529	5	7.13905	1.39458	5	13.9169	1.09107	5	24.5077	0.772452	5	11.4469	0.860268	5	41.6851	1477	164.116	6.02393
W5PJG0	Serum amyloid A protein OS=Ovis aries GN=LOC105601867 PE=3 SV=1 - [W5PJG0_SHEEP]	18.46	9	1	3	12	1.76235	2	8.78938	0.48948	2	32.2053	0.412316	2	10.8235	0.569959	2	16.9098	0.433025	2	13.9381	130	14.4692	8.67529
W5PXV3	Uncharacterized protein (Fragment) OS=Ovis aries GN=CTGF PE=4 SV=1 - [W5PXV3_SHEEP]	5.12	5	1	1	1	0.161119	1		0.0600564	1		0.0563712	1		0.0725417	1		0.0569977	1		254	28.1912	8.00146
Q155X5	Beta casein (Fragment) OS=Bos indicus PE=4 SV=1 - [Q155X5_BOSIN]	37.78	14	1	3	197	1.30997	1		0.949765	1		1.03231	1		1.5414	1		1.76842	1		45	5.16362	6.52197
Q28034	Glucosidase 2 subunit beta OS=Bos taurus GN=PRKCSH PE=2 SV=1 - [GLU2B_BOVIN]	3.94	4	2	2	2	0.38206	2	33.7949	0.436582	2	20.2649	0.296377	2	51.0881	0.349822	2	61.6249	0.4017	2	100.529	533	60.1131	4.44971
J9UHS4	Beta-casein (Fragment) OS=Bos taurus GN=CSN2 PE=4 SV=1 - [J9UHS4_BOVIN]	18.18	15	1	3	203	1.42248	7	23.3099	1.80368	7	26.5859	2.38083	7	26.8204	4.55569	7	27.3527	4.46492	7	29.4433	77	8.66551	6.78564
A5PKD8	Insulin-like growth factor-binding protein-like 1 OS=Bos taurus GN=IGFBPL1 PE=2 SV=1 - [IBPL1_BOVIN]	6.2	1	1	1	1	0.813562	1		0.523084	1		0.711153	1		0.807946	1		0.907237	1		274	28.6543	7.91357
F1S715	Uncharacterized protein OS=Sus scrofa GN=FUCA2 PE=1 SV=1 - [F1S715_PIG]	1.93	3	1	1	1	0.719571	1		0.60673	1		0.607578	1		0.721487	1		1.06751	1		467	53.912	6.31592
L8IG34	Pituitary tumor-transforming 1 protein-interacting protein OS=Bos mutus GN=M91_03258 PE=4 SV=1 - [L8IG34_9CETA]	9.14	4	2	2	2	1.18813	2	72.6624	1.55245	2	50.6753	1.81998	2	42.429	2.40904	2	45.7147	2.15576	2	56.2783	175	19.7769	8.80713
F1MK50	Uncharacterized protein OS=Bos taurus GN=OBP2B PE=4 SV=1 - [F1MK50_BOVIN]	12.36	3	1	2	3	1.19935	2	13.8092	0.850103	2	20.1272	0.915332	2	19.9405	1.49887	2	11.8562	1.23061	2	6.86083	178	19.7922	7.37158
L8HQH4	Alpha-2-HS-glycoprotein OS=Bos mutus GN=M91_05077 PE=4 SV=1 - [L8HQH4_9CETA]	13.93	7	5	5	10	0.863658	10	38.2729	1.14177	10	27.2884	1.2136	10	31.969	0.985851	10	52.6598	1.22021	10	25.5764	359	38.3473	5.49072
W5Q302	Uncharacterized protein OS=Ovis aries GN=GANAB PE=3 SV=1 - [W5Q302_SHEEP]	5.06	8	4	4	5	0.916588	5	15.9281	0.812805	5	12.4146	0.840454	5	29.2749	0.935916	5	35.1453	1.17052	5	36.5984	869	98.7642	5.89697
E1B991	Uncharacterized protein OS=Bos taurus GN=KRT2 PE=1 SV=2 - [E1B991_BOVIN]	2.92	18	1	2	2	2.31994	1		1.79454	1		1.84541	1		2.60946	1		3.76066	1		617	64.2946	8.67529
L8HU38	Uncharacterized protein (Fragment) OS=Bos mutus GN=M91_13462 PE=4 SV=1 - [L8HU38_9CETA]	6.67	1	1	1	8	0.409361	8	28.0769	0.398383	8	11.0291	0.538156	8	27.475	0.379539	8	19.3847	0.458035	8	25.5367	120	12.367	7.97217
I3L9V2	Uncharacterized protein OS=Sus scrofa GN=VAT1 PE=1 SV=1 - [I3L9V2_PIG]	3	2	1	1	1	0.881902	1		1.18378	1		0.907144	1		1.0597	1		1.3348	1		400	42.66	6.18896
W5QH04	Amine oxidase [flavin-containing] OS=Ovis aries GN=LOC101103614 PE=3 SV=1 - [W5QH04_SHEEP]	1.93	1	1	1	1	0.980831	1		0.669974	1		0.48379	1		0.419699	1		0.421898	1		518	57.9728	8.71924
P0DML7	Apolipoprotein E OS=Balaenoptera acutorostrata scammoni GN=APOE PE=3 SV=1 - [APOE_BALAS]	7.67	3	1	2	3	0.673965	2	43.3732	0.381858	2	44.5691	0.292663	2	83.2594	0.391809	2	86.0468	0.3442	2	93.2298	313	35.8695	5.43994
Q9XSM0	Prostaglandin-H2 D-isomerase OS=Ovis aries GN=PTGDS PE=1 SV=1 - [PTGDS_SHEEP]	7.33	1	1	1	1	1.13967	1		0.759185	1		0.425293	1		0.356531	1		0.43935	1		191	21.1696	6.55127
A5D7H9	Transporter OS=Bos taurus GN=SLC6A14 PE=2 SV=1 - [A5D7H9_BOVIN]	1.09	4	1	1	1	0.759774	1		0.855709	1		0.719306	1		1.03041	1		1.05565	1		640	71.98	8.11865
G3N3U3	Uncharacterized protein (Fragment) OS=Bos taurus GN=CIDEA PE=4 SV=1 - [G3N3U3_BOVIN]	8.26	7	1	1	2	1.14042	2	91.4072	0.636717	2	52.6649	0.674423	2	26.0368	0.796827	2	37.7963	0.644341	2	2.45494	109	12.2724	9.92041
Q4GZT4	ATP-binding cassette sub-family G member 2 OS=Bos taurus GN=ABCG2 PE=3 SV=2 - [ABCG2_BOVIN]	4.12	16	3	3	4	1.37146	4	5.04936	1.14502	4	6.26454	0.955732	4	14.8549	0.94303	4	17.4327	1.14563	4	9.88567	655	72.6779	8.66064
Q8HYW4	Sushi repeat containing protein (Fragment) OS=Bos taurus GN=etx1 PE=2 SV=1 - [Q8HYW4_BOVIN]	8.89	9	1	1	1																135	14.9984	8.74854
Q7YRR7	Apolipoprotein A2 (Fragment) OS=Sus scrofa GN=APOA2 PE=4 SV=1 - [Q7YRR7_PIG]	52.94	6	1	1	2	0.827954	2	4.51465	0.53733	2	1.80805	0.707642	2	57.2229	0.531196	2	19.3474	0.757148	2	26.3309	17	1.92898	8.66064
D3G9G3	Lactoferrin OS=Ovis aries GN=LF PE=3 SV=1 - [D3G9G3_SHEEP]	5.23	22	4	4	4	1.0305	4	4.12178	1.71135	4	3.8189	0.591163	4	24.7486	0.732825	4	13.3597	0.714246	4	32.7895	708	77.2324	8.01611
S9X3E6	Protein OS-9 OS=Camelus ferus GN=CB1_000607017 PE=4 SV=1 - [S9X3E6_9CETA]	2.92	39	1	2	13	1.00277	1		0.993044	1		1.13397	1		1.38492	1		1.13892	1		583	66.0727	5.2749
F1MS32	Apolipoprotein D OS=Bos taurus GN=APOD PE=4 SV=2 - [F1MS32_BOVIN]	6.88	4	1	1	1	1.05649	1		1.09441	1		1.11657	1		0.824726	1		0.919156	1		189	21.3868	5.04639
I3LF84	Uncharacterized protein OS=Sus scrofa GN=RAP1A PE=1 SV=1 - [I3LF84_PIG]	13.87	5	2	2	2	1.11269	2	14.5559	0.966046	2	1.98187	0.973144	2	4.6586	0.971685	2	12.7249	0.963455	2	4.01817	137	15.494	8.22119
S9WX05	Uncharacterized protein OS=Camelus ferus GN=CB1_000606063 PE=3 SV=1 - [S9WX05_9CETA]	3.92	18	2	4	7	1.15824	2	9.59204	0.962557	2	2.06298	1.18198	2	20.0375	1.38501	2	42.515	1.86762	2	44.2144	1072	116.723	6.25244
A1XEA5	Keratin 18 (Fragment) OS=Bos taurus GN=KRT18 PE=2 SV=1 - [A1XEA5_BOVIN]	10.98	9	1	1	1	1.23057	1		1.19704	1		1.38094	1		1.40189	1		2.18969	1		82	9.18652	4.41162
C6EVT4	E-cadherin OS=Sus scrofa PE=2 SV=1 - [C6EVT4_PIG]	2.27	7	2	2	2	0.89274	2	0.553142	0.730553	2	4.13025	0.830067	2	22.5036	0.811386	2	2.52597	1.02943	2	4.05795	883	97.6769	4.86865
F1MLW8	Uncharacterized protein OS=Bos taurus PE=4 SV=2 - [F1MLW8_BOVIN]	7.73	2	2	2	5	0.367884	5	13.55	0.481013	5	61.6865	0.334586	5	141.408	0.26463	5	129.428	0.383324	5	73.4498	233	24.6082	5.90967
L8IBW5	Ezrin (Fragment) OS=Bos mutus GN=M91_06270 PE=4 SV=1 - [L8IBW5_9CETA]	4.49	19	3	3	3	0.680067	3	13.7215	0.936454	3	7.65678	0.659024	3	12.8076	0.524454	3	26.0548	0.895461	3	10.2027	579	68.5394	6.30322
Q7M364	Antithrombin III OS=Sus scrofa domesticus PE=1 SV=1 - [Q7M364_PIG]	6.26	10	3	3	3	1.00051	3	12.4402	1.09536	3	4.808	1.56868	3	46.5566	1.24678	3	30.6331	1.21628	3	23.6455	431	48.9061	5.99854
L8ISW4	6-phosphogluconate dehydrogenase, decarboxylating (Fragment) OS=Bos mutus GN=M91_12838 PE=3 SV=1 - [L8ISW4_9CETA]	4.78	7	1	2	3	1.02944	1		1.40975	1		1.2028	1		1.36734	1		1.42701	1		481	52.8688	7.26904
Q862D8	Similar to S3 ribosomal protein (Fragment) OS=Bos taurus PE=2 SV=1 - [Q862D8_BOVIN]	17.24	8	2	2	2	0.661498	2	2.77165	0.682034	2	46.504	0.388204	2	29.1527	0.385597	2	22.6649	0.374281	2	15.1066	145	16.0718	9.99365
Q8MHZ7	Beta-lactoglobulin (Fragment) OS=Bubalus bubalis GN=bLG PE=4 SV=1 - [Q8MHZ7_BUBBU]	91.18	1	3	3	11	0.777253	11	25.5608	0.690034	11	38.0657	0.826211	11	23.7703	0.945785	11	25.4934	1.10935	11	29.438	34	3.93588	4.61475
W5Q6L8	Uncharacterized protein OS=Ovis aries GN=KRT14 PE=3 SV=1 - [W5Q6L8_SHEEP]	4.13	38	1	2	3	0.989712	1		1.31223	1		0.81819	1		0.85165	1		1.20361	1		436	48.6051	5.26221
Q2TBX4	Heat shock 70 kDa protein 13 OS=Bos taurus GN=HSPA13 PE=2 SV=1 - [HSP13_BOVIN]	2.76	2	1	1	1	0.924575	1		0.554882	1		0.627823	1		0.795227	1		0.867547	1		471	51.8879	5.30029
E1BG25	Uncharacterized protein OS=Bos taurus GN=MFI2 PE=3 SV=1 - [E1BG25_BOVIN]	3.38	7	2	2	2	0.541827	2	48.8851	0.888127	2	10.3936	0.775459	2	64.0992	0.455198	2	6.73275	0.528648	2	48.5818	739	80.6425	5.8208
F1SSG1	Uncharacterized protein OS=Sus scrofa GN=YKT6 PE=1 SV=1 - [F1SSG1_PIG]	4.55	4	1	1	1	0.966579	1		0.806377	1		0.783002	1		0.8672	1		0.920088	1		198	22.3364	6.78564
Q6UN62	Beta-casein variant A2' (Fragment) OS=Bos indicus PE=4 SV=1 - [Q6UN62_BOSIN]	35.94	14	1	3	200	1.17298	4	8.32016	1.16338	4	15.5385	1.46474	4	17.1659	1.77572	4	4.87874	1.82046	4	12.3647	64	7.07474	7.23975
L8HP94	Ig alpha-1 chain C region (Fragment) OS=Bos mutus GN=M91_08149 PE=4 SV=1 - [L8HP94_9CETA]	9.48	3	1	2	3	0.758057	1		0.808098	1		1.35956	1		1.24309	1		1.59807	1		348	36.7733	6.3667
F1S073	Annexin OS=Sus scrofa GN=ANXA2 PE=1 SV=2 - [F1S073_PIG]	2.95	6	1	1	1	1.29592	1		1.59022	1		1.0838	1		1.64875	1		1.73554	1		339	38.5548	7.31299
W5PGT9	Uncharacterized protein OS=Ovis aries GN=IGHE PE=4 SV=1 - [W5PGT9_SHEEP]	7.01	1	2	2	2	0.291714	2	29.2642	0.203462	2	115.22	0.266573	2	102.924	0.294934	2	101.797	0.16797	2	46.8366	371	41.8799	7.40088
S9W922	Coiled-coil domain-containing protein 168 OS=Camelus ferus GN=CB1_060782063 PE=4 SV=1 - [S9W922_9CETA]	0.17	1	1	1	1	1.39904	1		1.22074	1		1.90169	1		2.66364	1		2.85517	1		6369	716.726	8.99756
G3MXW7	Interferon regulatory factor 6 (Fragment) OS=Bos taurus GN=IRF6 PE=4 SV=1 - [G3MXW7_BOVIN]	1.29	1	1	1	4	1.24523	4	17.9079	1.07979	4	3.76041	1.30051	4	5.93149	1.61635	4	10.6757	1.74984	4	9.81761	544	61.597	5.73193
W5PSA3	Uncharacterized protein OS=Ovis aries GN=TCN1 PE=4 SV=1 - [W5PSA3_SHEEP]	2.58	2	1	1	1	0.813407	1		0.745115	1		0.644948	1		1.3236	1		1.21935	1		427	47.6073	8.36768
W5PHI7	Uncharacterized protein OS=Ovis aries GN=LOC101116892 PE=3 SV=1 - [W5PHI7_SHEEP]	15.27	5	1	3	5	0.833959	2	2.47195	1.10844	2	6.44772	1.0844	2	0.703502	0.756463	2	3.85213	0.798983	2	14.308	203	22.7268	5.09717
Q7M371	Plasma proteinase inhibitor (Fragment) OS=Ovis aries PE=1 SV=1 - [Q7M371_SHEEP]	40	2	1	1	1	1.06794	1		1.70432	1		2.27173	1		1.36631	1		1.4766	1		20	2.23816	4.61475
L8HN27	Fetuin-B OS=Bos mutus GN=M91_05078 PE=4 SV=1 - [L8HN27_9CETA]	2.58	3	1	1	2	0.619234	2	41.3732	0.631687	2	29.8514	1.02782	2	34.8978	1.098	2	42.5687	1.00165	2	40.6594	387	42.6321	5.77002
Q6YLM3	Kappa casein (Fragment) OS=Hippotragus niger PE=4 SV=1 - [Q6YLM3_HIPNI]	32.84	42	1	4	36	0.93128	3	4.39954	0.788806	3	8.22657	1.1796	3	7.01297	1.12447	3	2.07637	1.3362	3	3.92102	134	14.8104	5.70654
A5PK72	Putative uncharacterized protein OS=Bos taurus PE=2 SV=1 - [A5PK72_BOVIN]	6.78	5	1	2	3	0.522937	2	38.7016	0.384795	2	5.08063	0.343475	2	14.0724	0.291249	2	24.0413	0.391888	2	21.8167	236	24.7901	7.98682
L8II39	Elongation factor 2 (Fragment) OS=Bos mutus GN=M91_12003 PE=4 SV=1 - [L8II39_9CETA]	0.93	4	1	1	1	0.533291	1		1.07364	1		0.780377	1		0.541289	1		0.638701	1		858	95.304	6.82959
F1SFA1	Uncharacterized protein (Fragment) OS=Sus scrofa GN=PON1 PE=1 SV=2 - [F1SFA1_PIG]	2.98	6	1	1	1	0.994188	1		1.34949	1		0.940228	1		0.70364	1		0.857364	1		235	26.7596	5.56689
A6QQ28	Histone H2B OS=Bos taurus GN=H2B PE=2 SV=1 - [A6QQ28_BOVIN]	11.94	105	1	1	1	1.01823	1		0.904422	1		0.381696	1		0.384409	1		0.599593	1		67	7.3909	9.87646
W5Q5J5	Uncharacterized protein OS=Ovis aries GN=LOC101110855 PE=4 SV=1 - [W5Q5J5_SHEEP]	3.45	2	1	1	1	1.02003	1		0.748648	1		0.593335	1		0.41553	1		0.456406	1		203	22.6331	10.1548
L8HZM7	Tropomyosin alpha-1 chain (Fragment) OS=Bos mutus GN=M91_02037 PE=4 SV=1 - [L8HZM7_9CETA]	11.29	34	1	1	1	1.02802	1		1.51284	1		0.917414	1		0.79328	1		0.927324	1		62	7.20774	5.03369
P09954	Carboxypeptidase A1 OS=Sus scrofa GN=CPA1 PE=1 SV=2 - [CBPA1_PIG]	1.91	1	1	1	1	0.883046	1		0.99139	1		2.48349	1		2.00361	1		2.30389	1		419	47.2057	5.30029
Q0QEQ3	Isocitrate dehydrogenase 1 (Fragment) OS=Balaenoptera physalus GN=IDH1 PE=2 SV=1 - [Q0QEQ3_BALPH]	6.03	9	2	2	2	1.42799	2	14.6497	2.03053	2	10.958	1.10887	2	63.9242	1.30849	2	83.6578	1.11504	2	56.4147	365	41.0215	6.93213
W5P812	Uncharacterized protein OS=Ovis aries GN=AMBP PE=4 SV=1 - [W5P812_SHEEP]	3.13	1	1	1	1	0.873001	1		1.07193	1		1.10899	1		0.737707	1		0.508504	1		352	39.2033	7.40088
Q4VS17	FGFBP (Fragment) OS=Bos taurus PE=4 SV=1 - [Q4VS17_BOVIN]	7.48	3	1	1	1	1.28081	1		1.48112	1		6.55199	1		1.91271	1		2.51275	1		107	11.9281	8.96826
W5NR66	Uncharacterized protein OS=Ovis aries GN=EHMT1 PE=4 SV=1 - [W5NR66_SHEEP]	0.76	4	1	1	2	0.872249	2	21.3003	0.94268	2	26.2757	1.03316	2	3.76376	1.82929	2	3.83343	1.848	2	23.0135	1177	126.92	6.25244
L8IXF1	Retinol-binding protein 4 (Fragment) OS=Bos mutus GN=M91_12383 PE=4 SV=1 - [L8IXF1_9CETA]	6.67	5	1	1	1	1.10255	1		2.04806	1		1.64039	1		1.43936	1		1.55406	1		165	18.8601	5.22412
L8IW82	Ras-related protein Rab-18 (Fragment) OS=Bos mutus GN=M91_05545 PE=3 SV=1 - [L8IW82_9CETA]	7.47	3	1	1	1	1.23137	1		1.22623	1		1.79903	1		2.42479	1		3.11814	1		174	19.6428	5.18604
S9XJH6	Zinc finger protein 512B-like protein OS=Camelus ferus GN=CB1_000220025 PE=4 SV=1 - [S9XJH6_9CETA]	1.4	1	2	2	5	1.21415	5	9.01886	1.31668	5	23.3765	1.53763	5	13.2497	1.61741	5	3.22744	1.85147	5	9.59761	1071	116.882	9.78857
Q5C9G9	Kappa casein (Fragment) OS=Budorcas taxicolor GN=Kcas PE=4 SV=1 - [Q5C9G9_BUDTA]	24.63	38	1	3	34	0.964763	3	9.95579	0.905445	3	8.03764	0.899549	3	14.9681	0.988206	3	23.0594	1.35451	3	19.2432	134	14.6824	6.12549
P80933	Pregnancy-associated glycoprotein 62 (Fragment) OS=Capra hircus GN=PAG62 PE=1 SV=1 - [PAG62_CAPHI]	48.15	1	1	1	2	1.05824	2	38.9148	1.19078	2	11.6388	1.42672	2	14.1331	1.72677	2	0.183253	2.02966	2	33.0079	27	3.00453	8.99756
S9X1J5	Uncharacterized protein OS=Camelus ferus GN=CB1_000472026 PE=4 SV=1 - [S9X1J5_9CETA]	11.94	8	1	1	1	0.352462	1		0.506768	1		0.336172	1		0.265867	1		0.206738	1		67	7.51465	6.50732
W5P737	Uncharacterized protein (Fragment) OS=Ovis aries GN=BPIFB3 PE=4 SV=1 - [W5P737_SHEEP]	1.68	1	1	1	3	1.35113	3	1.54162	1.20967	3	7.17617	1.74009	3	13.8485	2.20483	3	21.1284	2.50918	3	24.8984	476	49.9106	6.80029
W5PSA9	Uncharacterized protein (Fragment) OS=Ovis aries GN=VPS13A PE=4 SV=1 - [W5PSA9_SHEEP]	0.38	2	1	1	1	1.21636	1		0.952415	1		0.911353	1		1.43923	1		1.26777	1		2394	273.04	6.11279
B8Y9T0	Cumulus cell-specific fibronectin 1 transcript variant OS=Bos taurus GN=FN1 PE=1 SV=1 - [B8Y9T0_BOVIN]	0.97	15	2	2	2	0.764831	2	40.9607	0.853396	2	11.2247	0.756336	2	34.1051	0.98744	2	24.8244	0.624695	2	46.1934	2268	248.974	5.63037
I3LD43	Uncharacterized protein OS=Sus scrofa GN=LOC100627689 PE=1 SV=1 - [I3LD43_PIG]	5.11	5	1	1	1	1.14768	1		1.07996	1		0.610651	1		0.48577	1		0.594769	1		235	25.4671	7.03467
Q6B826	Histone H4 (Fragment) OS=Bos indicus PE=3 SV=1 - [Q6B826_BOSIN]	23.26	37	1	1	1	1.64667	1		1.28065	1		0.711653	1		0.77016	1		0.85627	1		43	4.91284	10.9165
I3LUR7	Uncharacterized protein OS=Sus scrofa GN=COL6A3 PE=1 SV=1 - [I3LUR7_PIG]	0.28	1	1	1	1	1.59876	1		1.62622	1		1.06794	1		1.06111	1		1.20408	1		3170	342.18	6.66846
Q53DY7	Histone H1.3-like protein (Fragment) OS=Sus scrofa PE=2 SV=1 - [Q53DY7_PIG]	7.03	15	1	1	2	1.02637	2	4.838	1.12097	2	3.40694	0.619124	2	15.1442	0.569044	2	0.391445	0.764541	2	2.40223	128	12.8233	10.5796
I3LDA5	Uncharacterized protein (Fragment) OS=Sus scrofa GN=EHD4 PE=1 SV=1 - [I3LDA5_PIG]	2.96	4	1	1	1	0.993451	1		0.938592	1		1.03094	1		0.866071	1		0.906151	1		371	42.2248	5.98584
I3LV27	Uncharacterized protein OS=Sus scrofa GN=LAMA3 PE=4 SV=1 - [I3LV27_PIG]	0.42	2	1	1	2	1.08972	2	12.6492	0.65069	2	4.74955	0.70502	2	22.7148	1.77102	2	16.4713	2.5517	2	16.9102	1668	184.24	7.89893
A5J2A8	Thioredoxin (Fragment) OS=Sus scrofa GN=TRX PE=4 SV=1 - [A5J2A8_PIG]	30.23	5	1	1	2	1.04074	2	27.4656	1.27852	2	29.631	1.16962	2	39.4471	1.44408	2	36.4499	1.2669	2	42.4418	43	4.87643	8.00146
Q29231	Potential laminin-binding protein (Fragment) OS=Sus scrofa PE=2 SV=1 - [Q29231_PIG]	11.71	10	1	1	1	1.30979	1		1.36799	1		0.805854	1		0.651419	1		0.722794	1		111	12.1094	9.40771
Q95276	60S ribosomal protein L5 (Fragment) OS=Sus scrofa GN=RPL5 PE=2 SV=3 - [RL5_PIG]	8	15	1	1	1	0.621274	1		0.953897	1		0.585999	1		0.430598	1		1.05271	1		125	14.6588	10.1694
I3LFI0	Uncharacterized protein (Fragment) OS=Sus scrofa GN=RAC1 PE=1 SV=1 - [I3LFI0_PIG]	4.82	12	1	1	1	1.12261	1		0.643286	1		0.5726	1		0.520205	1		0.502692	1		166	18.6867	8.60205
K7GQ66	Uncharacterized protein OS=Sus scrofa GN=RPL8 PE=1 SV=1 - [K7GQ66_PIG]	7.48	11	1	1	1	0.918851	1		0.829461	1		0.509582	1		0.436026	1		0.564695	1		147	16.0419	11.8979
F1RZT2	Uncharacterized protein OS=Sus scrofa GN=PFDN6 PE=1 SV=1 - [F1RZT2_PIG]	4.65	6	1	1	2	0.52819	2	17.274	0.49297	2	23.2401	0.870883	2	102.722	0.644516	2	30.7059	0.710838	2	69.8367	129	14.5878	8.88037
F1SA97	Uncharacterized protein OS=Sus scrofa GN=LOC102161010 PE=1 SV=2 - [F1SA97_PIG]	1.81	4	1	1	8	0.916431	1		0.831596	1		0.995629	1		1.14225	1		1.44406	1		553	62.3515	5.96045
F1SL73	Uncharacterized protein OS=Sus scrofa GN=LOC100738230 PE=4 SV=2 - [F1SL73_PIG]	2.3	7	1	1	6	0.786663	6	5.31685	0.646317	6	8.41541	1.07471	6	12.3213	1.06408	6	6.77381	1.16256	6	9.49129	305	35.9532	6.02393
W5NXP3	Uncharacterized protein OS=Ovis aries GN=LOC101111083 PE=3 SV=1 - [W5NXP3_SHEEP]	12.2	1	2	3	3	0.990031	2	2.59561	1.18907	2	3.07529	1.2312	2	24.6377	0.682807	2	26.4676	1.05657	2	16.1805	205	22.7368	4.85596
P02075	Hemoglobin subunit beta OS=Ovis aries GN=HBB PE=1 SV=2 - [HBB_SHEEP]	19.31	65	1	3	3	1.35277	1		0.385919	1		0.168597	1		0.245652	1		0.345384	1		145	16.0633	7.29834
W5PZM9	Annexin OS=Ovis aries GN=ANXA5 PE=3 SV=1 - [W5PZM9_SHEEP]	3.54	1	1	1	1	0.733596	1		0.929634	1		0.734375	1		0.319704	1		0.355742	1		339	38.0635	4.98291
W5P3D6	Uncharacterized protein (Fragment) OS=Ovis aries PE=4 SV=1 - [W5P3D6_SHEEP]	8.09	7	1	1	1	0.739224	1		1.01812	1		0.510762	1		0.397698	1		0.454889	1		136	14.6624	9.01221
W5NWF7	Elongation factor Tu (Fragment) OS=Ovis aries GN=TUFM PE=3 SV=1 - [W5NWF7_SHEEP]	3.62	5	1	1	1	1.41256	1		1.47979	1		1.27247	1		1.85062	1		1.92128	1		414	45.4276	6.53662
W5PNC9	Uncharacterized protein OS=Ovis aries GN=AIM1 PE=4 SV=1 - [W5PNC9_SHEEP]	0.86	1	1	1	1	2.24851	1		1.85677	1		2.67776	1		4.66082	1		4.68239	1		1623	178.258	5.71924
Q9MZS8	Cathepsin D (Fragment) OS=Ovis aries GN=CTSD PE=1 SV=1 - [CATD_SHEEP]	8.22	7	2	2	2	0.800613	2	17.8565	0.70993	2	45.3585	0.714989	2	46.6876	0.793192	2	68.1589	0.803373	2	62.8041	365	39.7889	6.97607
A5YBU9	Complement factor B OS=Ovis aries GN=CFB PE=3 SV=1 - [A5YBU9_SHEEP]	1.18	5	1	1	1	1.87444	1		1.09339	1		1.38534	1		1.30974	1		1.3247	1		761	85.319	7.86963
W5Q268	Uncharacterized protein OS=Ovis aries GN=APOH PE=4 SV=1 - [W5Q268_SHEEP]	5.22	2	2	2	2	1.03429	2	16.8501	0.861869	2	6.0888	1.03797	2	15.3908	0.984843	2	8.44107	0.856043	2	9.94956	345	38.1306	8.07471
W5PS45	Alpha-mannosidase (Fragment) OS=Ovis aries GN=MAN2B1 PE=3 SV=1 - [W5PS45_SHEEP]	1.5	1	1	1	1	1.12348	1		0.941037	1		1.14738	1		1.17623	1		1.48636	1		1003	113.308	8.22119
W5P6F4	Uncharacterized protein OS=Ovis aries GN=C5 PE=4 SV=1 - [W5P6F4_SHEEP]	0.6	1	1	1	1	1.15747	1		0.901558	1		0.978151	1		0.83976	1		0.597297	1		1680	188.813	6.65381
W5NUN9	Uncharacterized protein OS=Ovis aries GN=MORF4L1 PE=4 SV=1 - [W5NUN9_SHEEP]	3.8	6	1	1	2	0.23441	2	16.7266	0.139918	2	31.2983	0.13544	2	49.3643	0.140618	2	49.4453	0.151468	2	62.4153	158	18.5663	7.06396
W5P8R7	Uncharacterized protein OS=Ovis aries GN=FCGBP PE=4 SV=1 - [W5P8R7_SHEEP]	0.39	1	1	1	1	0.65312	1		0.755199	1		0.455443	1		0.439115	1		0.49857	1		2544	271.079	4.90674
W5Q927	CD59 glycoprotein OS=Ovis aries GN=CD59 PE=4 SV=1 - [W5Q927_SHEEP]	4.92	1	1	1	1	0.512663	1		0.459022	1		0.511506	1		0.530498	1		0.409603	1		122	13.6868	7.47412
Q6IEB0	Putative ISG12(A) protein (Fragment) OS=Ovis aries GN=isg12(a) PE=2 SV=1 - [Q6IEB0_SHEEP]	13.16	2	1	1	1	1.35842	1		1.56671	1		2.51043	1		3.07045	1		2.12034	1		152	13.9166	10.3013
W5PYA9	Uncharacterized protein OS=Ovis aries GN=UBTFL1 PE=4 SV=1 - [W5PYA9_SHEEP]	2.05	1	1	1	1	1.45338	1		1.78772	1		0.686535	1		0.984284	1		0.592028	1		390	46.1963	9.23193
W5QDQ1	Uncharacterized protein OS=Ovis aries GN=C1orf94 PE=4 SV=1 - [W5QDQ1_SHEEP]	2.02	1	1	1	2	1.99266	2	4.77958	1.59111	2	12.4074	2.43656	2	11.7635	3.05918	2	8.16537	3.37553	2	4.76312	595	64.733	9.24658
W5QH45	Uncharacterized protein OS=Ovis aries GN=KNG1 PE=4 SV=1 - [W5QH45_SHEEP]	2.75	2	1	1	1	1.3228	1		1.58255	1		1.59088	1		1.65072	1		1.04189	1		436	48.6592	6.53662
W5NUD7	Uncharacterized protein OS=Ovis aries GN=LOC101113398 PE=4 SV=1 - [W5NUD7_SHEEP]	3.47	1	1	1	1	2.10541	1		1.4802	1		2.08312	1		1.34479	1		2.11268	1		375	39.2155	8.1333
W5PK06	Uncharacterized protein OS=Ovis aries GN=LOC101106730 PE=4 SV=1 - [W5PK06_SHEEP]	3.2	4	1	1	1	0.364359	1		0.280165	1		0.306947	1		0.303136	1		0.329501	1		250	28.23	8.04541
K4P494	Cystatin C OS=Ovis aries GN=CST3 PE=2 SV=1 - [K4P494_SHEEP]	5.48	4	1	1	2	0.639402	2	27.3367	0.848316	2	21.8421	0.901137	2	23.8752	0.945527	2	36.7407	1.16233	2	25.7303	146	16.1464	9.24658
W5PE92	Uncharacterized protein OS=Ovis aries GN=GRN PE=4 SV=1 - [W5PE92_SHEEP]	3.06	1	2	2	2	1.3615	2	15.331	1.16968	2	66.7211	1.22617	2	22.0267	1.35673	2	22.7614	1.44868	2	39.3733	588	62.6735	6.68311
W5QHZ8	Uncharacterized protein (Fragment) OS=Ovis aries PE=4 SV=1 - [W5QHZ8_SHEEP]	12.31	1	2	2	2	0.403593	2	129.64	0.381523	2	121.008	0.337482	2	564.649	0.295698	2	248.015	0.239288	2	429.249	130	14.3212	8.30908
W5P0W4	Uncharacterized protein (Fragment) OS=Ovis aries GN=SEMA7A PE=4 SV=1 - [W5P0W4_SHEEP]	1.3	3	1	1	1	0.940371	1		0.96009	1		1.2563	1		1.46138	1		1.80532	1		614	69.5551	6.82959
B5B304	Complement factor H (Fragment) OS=Ovis aries GN=CFH PE=2 SV=1 - [B5B304_SHEEP]	8.85	1	1	1	1	1.39519	1		0.655809	1		0.940943	1		0.75137	1		0.659975	1		113	13.1985	8.25049
H9A6H7	Myostatin variant A (Fragment) OS=Ovis aries GN=MSTN PE=4 SV=1 - [H9A6H7_SHEEP]	12.35	40	1	1	1	1.0139	1		0.360088	1		0.195654	1		0.159872	1		0.15667	1		81	9.29985	5.17334
W5PJA0	Uncharacterized protein (Fragment) OS=Ovis aries GN=CUTA PE=4 SV=1 - [W5PJA0_SHEEP]	7.91	1	1	1	1	1.23871	1		1.36489	1		0.993325	1		0.831611	1		1.98802	1		177	18.8028	5.47803
F1RPU4	Uncharacterized protein (Fragment) OS=Sus scrofa GN=SIGLEC15 PE=4 SV=1 - [F1RPU4_PIG]	3.09	1	1	1	1				2.55284	1		1.03807	1					1.41821	1		291	31.1847	7.97217
F1RQD2	Uncharacterized protein OS=Sus scrofa GN=TIMD4 PE=4 SV=1 - [F1RQD2_PIG]	2.11	1	1	1	1	1.54433	1		1.92038	1		1.83708	1		1.78057	1		1.33361	1		285	31.1748	8.104
F1SEH3	Uncharacterized protein OS=Sus scrofa GN=LRFN1 PE=4 SV=1 - [F1SEH3_PIG]	1.82	2	1	1	1	1.21034	1		1.12695	1		1.18762	1		1.53133	1		1.6932	1		768	81.8142	7.73779
S9YG39	Lebercilin OS=Camelus ferus GN=CB1_000591025 PE=4 SV=1 - [S9YG39_9CETA]	1.12	6	1	1	2	1.01963	2	44.845	1.1306	2	36.9864	1.39735	2	42.9317	1.66528	2	37.3609	2.03324	2	37.7682	536	61.6702	7.03467
L8IEA1	Beta-hexosaminidase subunit beta (Fragment) OS=Bos mutus GN=M91_13569 PE=4 SV=1 - [L8IEA1_9CETA]	1.77	12	1	1	1	1.00029	1		0.732517	1		0.970596	1		1.06816	1		1.2921	1		453	51.6064	8.32373
L8HR26	Cardiomyopathy-associated protein 5 (Fragment) OS=Bos mutus GN=M91_15736 PE=4 SV=1 - [L8HR26_9CETA]	0.51	3	1	1	1	0.939997	1		0.97664	1		1.32299	1		0.78646	1		1.25969	1		3931	434.682	4.65283
F1MKI5	45 kDa calcium-binding protein (Fragment) OS=Bos taurus GN=SDF4 PE=4 SV=2 - [F1MKI5_BOVIN]	5.12	6	1	1	1	1.62437	1		1.55129	1		1.05476	1		1.24304	1		1.05019	1		254	29.7755	4.729
L8IW97	Complement component C7 (Fragment) OS=Bos mutus GN=M91_07756 PE=4 SV=1 - [L8IW97_9CETA]	1.19	4	1	1	1	1.44147	1		1.11487	1		1.07497	1		1.10821	1		0.992816	1		841	92.8163	7.02002
L8IG93	Glutathione peroxidase (Fragment) OS=Bos mutus GN=M91_14332 PE=3 SV=1 - [L8IG93_9CETA]	10.07	5	1	1	2	0.981632	2	22.6236	1.00594	2	11.6652	0.827322	2	13.0193	0.925345	2	9.24799	0.903149	2	17.2586	139	16.1201	6.55127
E1BFQ0	Uncharacterized protein OS=Bos taurus GN=LOC532875 PE=3 SV=2 - [E1BFQ0_BOVIN]	1.75	1	1	1	1	1.20746	1		0.28263	1		0.573971	1		0.552502	1		0.810156	1		802	87.813	9.0415
L8HVC5	Uncharacterized protein (Fragment) OS=Bos mutus GN=M91_17429 PE=4 SV=1 - [L8HVC5_9CETA]	0.48	1	1	1	1	1.40395	1		1.51934	1		2.64305	1		2.48354	1		2.16081	1		2890	332.28	6.84424
F1SIM7	Uncharacterized protein OS=Sus scrofa GN=DNAJB9 PE=4 SV=1 - [F1SIM7_PIG]	3.59	3	1	1	2	0.948292	2	86.8108	1.02786	2	249.59	0.855955	2	69.0014	0.894573	2	41.8914	1.05949	2	81.5552	223	25.6643	8.52881
Q2KJE5	Glyceraldehyde-3-phosphate dehydrogenase, testis-specific OS=Bos taurus GN=GAPDHS PE=2 SV=1 - [G3PT_BOVIN]	4.56	5	2	2	9	1.3636	9	114.18	1.94108	9	21.4598	1.48036	9	73.4603	2.55917	9	94.0068	4.08432	9	40.1503	395	43.2603	8.11865
L8HLN2	Uncharacterized protein (Fragment) OS=Bos mutus GN=M91_14553 PE=4 SV=1 - [L8HLN2_9CETA]	7.76	1	1	1	1	0.623068	1		0.330856	1		0.372507	1		0.230634	1		0.388528	1		116	11.9748	4.81787
L8IM56	Uncharacterized protein (Fragment) OS=Bos mutus GN=M91_03189 PE=3 SV=1 - [L8IM56_9CETA]	6.96	14	1	3	4	0.99496	1		1.0703	1		1.23455	1		0.917699	1		1.0936	1		345	38.9193	5.5542
S9Y6H1	Separin OS=Camelus ferus GN=CB1_000606043 PE=4 SV=1 - [S9Y6H1_9CETA]	0.29	4	1	1	1	1.0518	1		1.16361	1		1.14668	1		0.919647	1		0.955433	1		2073	225.974	7.25439
B2CB99	CD14 (Fragment) OS=Bubalus bubalis GN=CD14 PE=4 SV=1 - [B2CB99_BUBBU]	9.09	16	1	1	1	0.643497	1		0.872703	1		0.905277	1		0.893783	1		1.35685	1		88	9.17272	8.36768
S9XM89	Condensin-2 complex subunit G2 OS=Camelus ferus GN=CB1_000125016 PE=4 SV=1 - [S9XM89_9CETA]	1.29	1	1	1	1	1.88213	1		1.69954	1		2.30994	1		2.5818	1		2.19192	1		773	88.1104	7.86963
S9WML5	Uncharacterized protein OS=Camelus ferus GN=CB1_001331012 PE=4 SV=1 - [S9WML5_9CETA]	7	1	1	1	1	0.83479	1		1.10079	1		1.33438	1		1.16852	1		1.40166	1		100	10.5442	6.50732
A6H7J6	Protein disulfide-isomerase OS=Bos taurus GN=P4HB PE=1 SV=1 - [A6H7J6_BOVIN]	1.96	4	1	1	1	1.13	1		1.25215	1		0.828041	1		1.13489	1		1.03091	1		510	57.1678	4.90674
V5RMG9	Kappa casein (Fragment) OS=Bos indicus GN=CSN3 PE=4 SV=1 - [V5RMG9_BOSIN]	10.94	1	2	2	4	1.97132	4	32.0717	1.75302	4	2.17128	2.42246	4	4.33601	3.92024	4	70.6283	4.16269	4	30.5506	64	6.71541	4.08154
S9XE49	Uncharacterized protein OS=Camelus ferus GN=CB1_000307002 PE=4 SV=1 - [S9XE49_9CETA]	0.71	6	1	1	1	0.94029	1		3.31894	1		0.673432	1		0.70842	1		0.820808	1		2807	315.44	7.28369
A6QM09	Putative uncharacterized protein OS=Bos taurus PE=2 SV=1 - [A6QM09_BOVIN]	13.79	8	2	3	8	0.276888	7	26.1353	0.228676	7	29.9037	0.264119	7	33.1192	0.214652	7	21.1964	0.232352	7	35.9378	232	24.7172	7.60596
L8IAF4	Ig lambda-1 chain C regions (Fragment) OS=Bos mutus GN=M91_02158 PE=4 SV=1 - [L8IAF4_9CETA]	14.29	1	1	1	4	0.61549	4	14.1816	0.600401	4	6.36508	0.59007	4	7.69222	0.563679	4	9.54895	0.627483	4	14.7072	105	11.1785	8.6167
Q4JJA4	Peroxiredoxin 1 (Fragment) OS=Bubalus bubalis PE=4 SV=1 - [Q4JJA4_BUBBU]	12.7	12	1	1	1	0.558907	1		2.23534	1		0.533675	1		0.434488	1		0.52992	1		63	6.82874	8.57275
T0NH57	RNA-binding protein 5 isoform 1 OS=Camelus ferus GN=CB1_000145031 PE=4 SV=1 - [T0NH57_9CETA]	0.92	5	1	1	1	1.0208	1		1.10207	1		1.22274	1		1.19428	1		1.17402	1		765	86.9295	5.88428
M5FJT7	N-acetylglucosamine-1-phosphotransferase subunit gamma OS=Bos taurus GN=GNPTG PE=4 SV=1 - [M5FJT7_BOVIN]	2.86	3	1	1	1	0.918635	1		0.668201	1		0.877947	1		0.894759	1		0.872011	1		280	31.3875	6.3667
L8IVX5	60S ribosomal protein L27 OS=Bos mutus GN=M91_19439 PE=4 SV=1 - [L8IVX5_9CETA]	10.53	5	1	1	1	0.470332	1		0.95845	1		0.49454	1		0.377272	1		0.436202	1		76	8.40573	10.6235
Q32KU6	Tetraspanin-6 OS=Bos taurus GN=TSPAN6 PE=2 SV=1 - [TSN6_BOVIN]	3.27	2	1	1	1	0.639497	1		0.667666	1		0.703176	1		0.896042	1		0.770579	1		245	27.506	7.73779
F1MDD5	Uncharacterized protein OS=Bos taurus GN=LAMA3 PE=1 SV=2 - [F1MDD5_BOVIN]	0.34	3	1	1	1	1.25069	1		1.10118	1		0.823915	1		1.15028	1		0.57591	1		3242	356.889	6.81494
L8I958	Syndecan (Fragment) OS=Bos mutus GN=M91_08925 PE=3 SV=1 - [L8I958_9CETA]	11.83	3	2	2	5	1.67567	5	25.1817	1.4517	5	29.5765	1.63944	5	19.8783	1.47163	5	10.6912	1.35512	5	13.3711	186	20.5443	4.84326
I3LBB1	Olfactory receptor OS=Sus scrofa PE=3 SV=1 - [I3LBB1_PIG]	3.28	5	1	1	1	0.327355	1		1.1881	1		1.31237	1		1.61573	1		0.604954	1		305	33.9442	6.69775
Q58D04	Chitinase domain-containing protein 1 OS=Bos taurus GN=MGC3234 PE=2 SV=1 - [Q58D04_BOVIN]	3.49	7	1	1	1	1.22299	1		1.28779	1		1.06715	1		1.37479	1		1.67358	1		258	29.0891	8.68994
F1N1C5	Uncharacterized protein (Fragment) OS=Bos taurus GN=FBXO40 PE=4 SV=2 - [F1N1C5_BOVIN]	2.25	1	1	1	2	2.04245	2	18.2622	2.85423	2	142.795	1.16306	2	25.462	2.25075	2	6.8414	1.62249	2	17.1548	712	80.3844	6.85889
A7YVI7	KIAA0415 protein (Fragment) OS=Bos taurus GN=KIAA0415 PE=2 SV=1 - [A7YVI7_BOVIN]	1.74	3	1	1	1	1.55292	1		1.05794	1		1.63041	1		1.98746	1		1.84658	1		748	81.5548	7.54736
P02080	Hemoglobin subunit beta-C(NA) OS=Ammotragus lervia PE=1 SV=1 - [HBBN_AMMLE]	21.99	38	1	3	3	1.24881	1		0.535912	1		0.536454	1		0.970346	1		0.952784	1		141	15.6233	11.5757
L8IC82	Transitional endoplasmic reticulum ATPase (Fragment) OS=Bos mutus GN=M91_01524 PE=3 SV=1 - [L8IC82_9CETA]	1.5	7	1	1	1	0.591949	1		0.737929	1		0.540879	1		0.514803	1		0.476173	1		799	88.5174	5.35107
B0BL70	Mannose-binding lectin OS=Capra hircus GN=mbl PE=4 SV=1 - [B0BL70_CAPHI]	4.42	6	1	1	1	0.85512	1		0.986156	1		0.579597	1		0.471139	1		0.368603	1		249	26.5029	4.89404
Q58D71	Putative uncharacterized protein FLJ36812 OS=Bos taurus GN=FLJ36812 PE=2 SV=1 - [Q58D71_BOVIN]	12.68	2	1	1	1	1.97355	1		1.5738	1		2.08122	1		3.28884	1		3.61453	1		213	23.6227	8.07471
Q2F7Z7	Transmembrane protein 59 OS=Sus scrofa GN=TMEM59 PE=2 SV=1 - [TMM59_PIG]	2.79	3	1	1	1	0.637173	1		1.12145	1		1.1322	1		1.59534	1		0.978533	1		323	36.1108	5.03369
F1MD24	Uncharacterized protein OS=Bos taurus GN=SLC5A1 PE=3 SV=2 - [F1MD24_BOVIN]	1.66	6	1	1	2	1.00959	2	23.8848	1.23885	2	21.9691	1.26302	2	0.0113518	1.2981	2	5.10296	1.29903	2	10.2011	664	73.0538	7.23975
F1MX05	Saccharopine dehydrogenase-like oxidoreductase OS=Bos taurus GN=SCCPDH PE=4 SV=2 - [F1MX05_BOVIN]	3.03	4	1	1	1	0.457844	1		0.457007	1		1.08019	1		0.66678	1		0.895326	1		429	47.2854	8.92432
L8HLB7	E3 ubiquitin-protein ligase TRIM31 (Fragment) OS=Bos mutus GN=M91_05115 PE=4 SV=1 - [L8HLB7_9CETA]	2.53	2	1	1	1	0.657014	1		0.830694	1		1.2949	1		1.58173	1		1.51838	1		475	53.1001	7.43018
A5JSS6	Procollagen-lysine 2-oxoglutarate 5-dioxygenase 3 (Fragment) OS=Capra hircus PE=2 SV=1 - [A5JSS6_CAPHI]	6.48	7	1	1	1	0.83301	1		0.590381	1		0.687014	1		0.663632	1		0.684852	1		216	24.8104	5.19873
A3KLR9	Superoxide dismutase [Cu-Zn] OS=Bos taurus GN=ECSOD PE=1 SV=1 - [A3KLR9_BOVIN]	5.39	5	1	1	1	2.66895	1		1.90558	1		1.83158	1		2.2494	1		2.09324	1		241	26.1599	7.07861
S9X7P1	Uncharacterized protein (Fragment) OS=Camelus ferus GN=CB1_000304011 PE=4 SV=1 - [S9X7P1_9CETA]	3.12	6	1	1	1	0.555087	1		0.461943	1		0.469476	1		0.477631	1		0.470354	1		417	47.9506	5.70654
S9WBE6	FAD-dependent oxidoreductase domain-containing protein 2 OS=Camelus ferus GN=CB1_022350004 PE=4 SV=1 - [S9WBE6_9CETA]	1.72	5	1	1	1	1.64622	1		1.03521	1		1.04996	1		1.27913	1		1.43138	1		638	72.6518	7.73779
B3VF96	Muscle and heart F-box protein 40 (Fragment) OS=Sus scrofa PE=2 SV=1 - [B3VF96_PIG]	2.92	2	1	1	1	2.10275	1		2.7374	1		2.522	1		4.0302	1		1.27415	1		548	61.2975	7.40088
Q0QF27	Malate dehydrogenase (Fragment) OS=Hippopotamus amphibius GN=MDH2 PE=2 SV=1 - [Q0QF27_HIPAM]	5.6	13	1	1	1	1.47967	1		1.0459	1		0.601447	1		0.345351	1		0.384233	1		232	24.4568	8.08936
