# Supplementary material for: Exploration of ovine milk whey proteome during postnatal development using an iTRAQ approach
Source: PeerJ. 2020 Oct 8;8:e10105. doi: 10.7717/peerj.10105 (PMC7548079; doi:10.7717/peerj.10105)
Supplement: Supplemental Information 4 [file peerj-08-10105-s004.xlsx]

## Sheet: Sheet1
Sequence	# PSMs	# Proteins	# Protein Groups	Protein Group Accessions	Modifications	3d/0d	3d/0d Count	3d/0d Variability [%]	7d/0d	7d/0d Count	7d/0d Variability [%]	14d/0d	14d/0d Count	14d/0d Variability [%]	28d/0d	28d/0d Count	28d/0d Variability [%]	56d/0d	56d/0d Count	56d/0d Variability [%]	IonScore	Charge	MH+ [Da]	ΔM [ppm]	# Missed Cleavages
lAFNPTQLEGQcHV	192	3	1	P67975	N-Term(iTRAQ8plex); C12(Carbamidomethyl)	0.930224	191	16.4291	0.823853	191	19.011	1.00524	190	22.8333	1.35326	191	18.4597	1.56507	191	22.3274	109.03	2	1917.97	-3.33959	0
aNNNDNTFNQVSEDLR	1	1	1	W5Q5H8	N-Term(iTRAQ8plex)	2.98932	1		3.31824	1		2.33804	1		1.90426	1		1.55683	1		103.93	2	2155.03	-1.36198	0
yLLFcMENSAEPEQSLAcQcLVR	93	11	2	P67975;B2YKY6	N-Term(iTRAQ8plex); C5(Carbamidomethyl); C18(Carbamidomethyl); C20(Carbamidomethyl)																101.66	3	3122.47	-1.02997	0
vFPLVScVSSPSDENTVALGcLAR	9	1	1	W5NXW9	N-Term(iTRAQ8plex); C7(Carbamidomethyl); C21(Carbamidomethyl)	0.580927	9	20.9472	0.400853	9	27.6658	0.256496	9	43.576	0.255709	9	68.8699	0.292461	9	39.6902	101.27	3	2882.46	-1.69875	0
fQSEEQQQTEDELQDk	174	9	1	P11839	N-Term(iTRAQ8plex); K16(iTRAQ8plex)	2.8517	173	26.4118	1.54028	173	20.1422	0.944479	173	25.6208	1.86924	173	24.1112	1.46455	173	24.5846	98.2	2	2590.27	0.402305	0
iVSDISEGQVETVQSSPTTYR	9	1	1	W5NXW9	N-Term(iTRAQ8plex)	0.748413	9	38.8087	0.640311	9	52.088	0.556037	9	78.8906	0.72072	9	88.9414	0.573762	9	143.674	91.12	2	2600.34	-0.0978653	0
dMPIQAFLLYQEPVIGPVR	486	24	4	R4R2H5;P11839;Q9TSI0;D7NJ85	N-Term(iTRAQ8plex)																87.91	2	2490.37	-1.25544	0
fLDDDLTDDIVcAk	199	3	1	P00712	N-Term(iTRAQ8plex); C12(Carbamidomethyl); K14(iTRAQ8plex)	1.45641	199	16.8967	1.28042	199	18.1161	1.77089	199	21.239	2.24813	199	23.5606	1.39365	199	19.0324	87.84	2	2248.16	-2.4514	0
cTTLISSEGYVSDDYVGR	6	6	2	W5P9V5;A6QNW3	N-Term(iTRAQ8plex); C1(Carbamidomethyl)																84	2	2326.12	0.942	0
yGTTTSQLDADGSYFLYSR	61	1	1	W5PH95	N-Term(iTRAQ8plex)	0.448346	61	33.075	0.363342	61	37.2493	0.446188	61	28.1051	0.431966	61	45.0317	0.401991	61	36.9485	83.21	2	2449.18	-2.13035	0
iTGLDPAGPNFEYAEAPSR	3	15	1	A0FI82	N-Term(iTRAQ8plex)	1.09611	3	7.0043	0.91715	3	3.56754	0.911403	3	9.57424	1.28711	3	9.42626	1.05562	3	2.23576	82.14	3	2309.16	-3.32924	0
cQEILEVDcSASSPTQTLLR	4	2	1	W5PZI1	N-Term(iTRAQ8plex); C1(Carbamidomethyl); C9(Carbamidomethyl)	1.07562	4	18.1275	3.03811	4	2.31759	0.69052	4	6.98868	0.997674	4	40.362	0.752662	4	36.8707	82.07	3	2611.29	-2.96108	0
hQGLSPEVLNENLLR	406	4	1	D2DRB7	N-Term(iTRAQ8plex)	1.43084	404	21.5961	1.38761	404	35.059	1.70449	404	43.7751	2.11672	404	41.8181	1.91482	404	30.9917	81.91	3	2023.12	-1.61271	0
yPVEPFTESQSLTLTDVEk	710	7	1	P11839	N-Term(iTRAQ8plex); K19(iTRAQ8plex)	1.20838	707	14.0357	1.19826	707	16.2672	2.02501	707	17.4221	2.57784	707	19.564	2.8754	707	19.2924	80.49	2	2791.47	-5.89193	0
dmPIQAFLLYQEPVLGPVR	92	24	4	P11839;R4R2H5;Q9TSI0;D7NJ85	N-Term(iTRAQ8plex); M2(Oxidation)																79.6	2	2506.37	0.0995472	0
yLLFcmENSAEPEQSLAcQcLVR	33	11	2	P67975;B2YKY6	N-Term(iTRAQ8plex); C5(Carbamidomethyl); M6(Oxidation); C18(Carbamidomethyl); C20(Carbamidomethyl)																77.89	2	3138.47	0.93039	0
dLYANTVLSGGTTMYPGIADR	1	25	1	A1E0X2	N-Term(iTRAQ8plex)	0.804435	1		1.33932	1		0.888815	1		0.847763	1		1.12264	1		76.51	2	2519.27	-0.183131	0
aLEESNYELEGk	1	1	1	S9WUY9	N-Term(iTRAQ8plex); K12(iTRAQ8plex)	1.62075	1		1.71731	1		2.07581	1		2.26235	1		3.45728	1		76.19	2	1990.05	-2.91104	0
nQPEPTVEEIEDAFQGNLcR	6	11	2	W5PMT0;S9Y4T1	N-Term(iTRAQ8plex); C19(Carbamidomethyl)																75.37	3	2650.27	-1.01573	0
dIGSESIEDQAMEDAk	16	5	1	P04653	N-Term(iTRAQ8plex); K16(iTRAQ8plex)	2.96919	16	45.6053	1.28083	16	19.9292	0.776134	16	53.392	1.3978	16	23.7273	1.11655	16	47.0884	73.52	2	2346.16	-1.01674	0
aLNEINQFYQk	252	18	3	E7BQS5;P04654;E7BQS3	N-Term(iTRAQ8plex); K11(iTRAQ8plex)																72.94	2	1976.1	-2.9158	0
iLLQGTPVAEMAEDAIDGER	3	1	1	O46544	N-Term(iTRAQ8plex)	0.784062	3	4.60803	0.955773	3	12.8473	0.85182	3	1.07252	0.936414	3	6.02799	0.866738	3	0.361879	71.87	3	2432.26	-2.90712	0
lVETALTPDScYPD	7	1	1	W5PPQ8	N-Term(iTRAQ8plex); C11(Carbamidomethyl)	0.695014	7	30.1325	0.707626	7	16.973	0.910771	7	48.0229	0.862446	7	25.971	0.970883	7	25.2839	71.31	2	1884.92	-1.07422	0
vGGNAGAYGAEALER	2	6	1	C6ZP46	N-Term(iTRAQ8plex)	2.22309	2	41.7713	0.46305	2	224.667	0.525665	2	75.1906	0.618631	2	66.8664	0.767583	2	45.8664	71.24	2	1738.9	-1.67663	0
sSVTFDcSLGPEVADTAk	26	1	1	W5P9V5	N-Term(iTRAQ8plex); C7(Carbamidomethyl); K18(iTRAQ8plex)	0.641366	26	45.9042	0.626242	26	46.5524	0.742965	26	17.5532	1.0123	26	19.283	0.841532	26	18.1212	71.23	2	2492.27	-5.33496	0
qDSEGLVAVQLADQDR	2	2	1	W5P5I0	N-Term(iTRAQ8plex)	1.09029	2	11.6894	1.00857	2	17.8927	0.708801	2	24.2544	0.68469	2	17.6603	0.55379	2	88.4747	70.76	2	2048.05	-1.32658	0
aDGSTINQNVk	55	1	1	W5PSQ7	N-Term(iTRAQ8plex); K11(iTRAQ8plex)	0.245022	55	39.9197	0.191982	55	36.9728	0.234466	55	30.0775	0.21901	55	47.7713	0.232891	55	34.3437	70.33	2	1754.99	2.18705	0
yGETAAVYVAVESR	10	7	2	W5P9V5;A6QNW3	N-Term(iTRAQ8plex)																69.91	3	1818.95	-2.32008	0
sPIFGPEEVTSVEGR	4	3	2	W5P9V5;A6QNW3	N-Term(iTRAQ8plex)																69.47	2	1908	-3.02626	0
tVMENFVAFVDk	24	7	3	P14639;P02769;X2GM95	N-Term(iTRAQ8plex); K12(iTRAQ8plex)																69.34	2	2008.09	-5.45616	0
vHNEGLPAPIVR	122	1	1	L8HPF5	N-Term(iTRAQ8plex)	0.355677	122	51.8196	0.344905	122	72.9124	0.292863	122	53.9133	0.272652	122	78.7342	0.323077	122	75.6894	68.7	4	1605.94	2.13805	0
hQGLSSEVLNENLLR	1	1	1	P04653	N-Term(iTRAQ8plex)	0.912904	1		0.875036	1		0.82488	1		0.7538	1		8.0876	1		67.62	3	2013.1	-1.38413	0
vLVLDTDYk	390	20	3	P67975;B2YKY6;G5E5H7	N-Term(iTRAQ8plex); K9(iTRAQ8plex)																67.2	2	1673.99	-4.42165	0
sDLEDEIIPEEDIISR	7	1	1	S9XDK9	N-Term(iTRAQ8plex)	0.728376	7	17.3309	0.747498	7	17.608	0.762443	7	13.9248	0.832615	7	9.58537	0.735858	7	28.5371	67.08	2	2177.11	0.265282	0
hGEYGFQNALIVR	8	4	1	P14639	N-Term(iTRAQ8plex)	1.29065	8	24.085	1.03632	8	7.67692	1.29387	8	35.5395	1.07371	8	16.2746	0.983025	8	34.4417	67.07	3	1807.97	-1.42903	0
eccHGDLLEcADDR	35	11	3	P14639;P02769;X2GM95	N-Term(iTRAQ8plex); C2(Carbamidomethyl); C3(Carbamidomethyl); C10(Carbamidomethyl)																66.85	2	2053.86	-1.78585	0
lSSPAQSQTQLNLSTLLVNPEGPTLTR	1	3	2	W5Q6U0;Q06B57	N-Term(iTRAQ8plex)																66.66	3	3169.74	0.171218	0
vTGIITQGAR	9	14	3	W5PNP1;Q95114;G5CC03	N-Term(iTRAQ8plex)																66.65	3	1319.79	-0.475208	0
aDDSDPVGGEFLAEGGGVR	2	1	1	P84482	N-Term(iTRAQ8plex)	0.912647	2	37.5842	2.23078	2	11.429	1.45475	2	28.0905	0.931219	2	36.3774	0.754067	2	174.502	66.36	2	2152.05	0.0459455	0
yLGYLEQLLR	45	16	5	D2DRB7;P04653;Q8MIH4;Q69EZ6;B5B3R8	N-Term(iTRAQ8plex)																66.21	3	1571.91	-1.98413	0
sSLIcQATDFSPk	7	4	1	W5NXW9	N-Term(iTRAQ8plex); C5(Carbamidomethyl); K13(iTRAQ8plex)	0.699634	7	31.4069	0.689352	7	43.4895	0.666334	7	53.6467	0.640287	7	23.4283	0.64841	7	41.6633	66.12	3	2062.11	-1.85347	0
lcTTScEEVVR	120	5	2	E7BQS5;P04654	N-Term(iTRAQ8plex); C2(Carbamidomethyl); C6(Carbamidomethyl)																65.88	3	1657.82	-1.99012	0
gDSVAYGLk	19	11	1	Q9XSY9	N-Term(iTRAQ8plex); K9(iTRAQ8plex)	1.78646	19	35.7571	1.83835	19	22.7321	2.53094	19	43.2247	4.87068	19	61.7011	3.71327	19	48.707	64.6	2	1517.88	-0.909544	0
eEIVYDLNPLDPR	1	3	1	W5NUX8	N-Term(iTRAQ8plex)	1.29341	1		1.33738	1		1.35777	1		1.69556	1		1.19063	1		64.23	2	1876.99	-1.7912	0
gPFPILV	278	7	3	P11839;Q9TSI0;D7NJ85	N-Term(iTRAQ8plex)																64.04	2	1046.65	-0.342563	0
iIPSAEDPSQDIVER	6	2	1	W5PPQ8	N-Term(iTRAQ8plex)	0.460934	6	17.4007	0.439658	6	31.0421	0.418326	6	17.9306	0.369778	6	9.10105	0.43454	6	18.3869	63.99	2	1973.05	0.563259	0
hIPVVTQGSNVQSLTQDDGVAk	5	5	2	Q2UVX4;S9XDK9	N-Term(iTRAQ8plex); K22(iTRAQ8plex)																63.99	4	2901.58	-3.89505	0
sAEAVLGEALTDFSLR	1	5	1	W5PJZ2	N-Term(iTRAQ8plex)	0.571828	1		0.706765	1		0.527408	1		0.662585	1		0.59144	1		63.95	3	1983.07	-0.456018	0
mPcTEDYLSLILNR	16	6	2	P14639;P02769	N-Term(iTRAQ8plex); C3(Carbamidomethyl)																63.38	3	2029.04	-0.823577	0
sINPDEAVAYGAAVQAAILSGDk	2	10	1	P19120	N-Term(iTRAQ8plex); K23(iTRAQ8plex)	1.11281	2	28.4474	0.83	2	9.10851	1.41628	2	39.3765	1.10209	2	26.4825	0.988855	2	20.2259	63.36	3	2868.54	-5.22402	0
dLLFSDDTEcLANLQDR	3	4	1	W5PFC9	N-Term(iTRAQ8plex); C10(Carbamidomethyl)	0.983943	3	7.77888	0.800163	3	4.80704	1.04094	3	27.7291	1.06223	3	6.33202	0.980925	3	21.7864	63.32	3	2329.14	3.31765	0
dLLDDYVNTQGASLLTLSR	1	1	1	Q7M323	N-Term(iTRAQ8plex)	1	1		0.834338	1		0.970658	1		0.86561	1		0.90639	1		63.13	3	2398.27	-1.68541	0
fELLGcELDGcTEPLGLk	11	4	2	W5PNP1;G5CC03	N-Term(iTRAQ8plex); C6(Carbamidomethyl); C11(Carbamidomethyl); K18(iTRAQ8plex)																62.87	3	2659.39	-2.89056	0
tITSVAVTSALPIIQk	2	11	2	A6ZE99;L8I632	N-Term(iTRAQ8plex); K16(iTRAQ8plex)																62.45	2	2250.38	-2.01213	0
sPAQTxQWQVLPNAVPAk	596	24	5	D2SZC1;P02669;D2SZE0;D2SZE3;D2SZA9	N-Term(iTRAQ8plex); X6(I); K18(iTRAQ8plex)																62.4	3	2556.47	-3.0149	0
iINEPTAAAIAYGLDR	1	34	1	K8FK38	N-Term(iTRAQ8plex)	1.01798	1		0.954608	1		0.695097	1		0.601378	1		0.738029	1		62.2	3	1992.12	5.10824	0
qPMIAVNQELAYFYPQLFR	17	9	4	D2DRB7;P04653;Q8MIH4;Q69EZ6	N-Term(iTRAQ8plex)																62.18	3	2632.39	-1.55102	0
vDGVTQNSNFQNSFTDQDSk	5	1	1	W5QHZ5	N-Term(iTRAQ8plex); K20(iTRAQ8plex)	0.377906	5	36.7164	0.485009	5	64.5943	0.469166	5	34.4559	0.436313	5	9.23772	0.469601	5	46.1074	62.15	3	2839.39	-3.25658	0
dAFAADMVLPDSFDAR	3	2	1	S5FR89	N-Term(iTRAQ8plex)	0.96341	3	14.2891	0.582832	3	31.5586	0.621214	3	32.867	0.628726	3	19.2833	0.710659	3	41.3053	62.06	2	2045	0.564397	0
vQNATLAVANITNADSATR	2	7	1	T0MKA5	N-Term(iTRAQ8plex)	1.01661	2	62.2216	0.840574	2	25.4931	0.663554	2	13.6898	0.831632	2	13.7501	0.705781	2	35.4539	61.92	2	2234.2	-0.172894	0
yNVPQLEIVPk	370	8	3	D2DRB7;P04653;Q8MIH4	N-Term(iTRAQ8plex); K11(iTRAQ8plex)																61.73	2	1908.13	-4.51813	0
iNLFDSPLEVQYVR	14	2	1	W5PNP1	N-Term(iTRAQ8plex)	0.821011	14	19.1014	0.605151	14	18.5596	0.560324	14	23.3849	0.725772	14	16.4717	0.677435	14	19.2915	61.72	3	1997.09	-7.35796	0
dALSSVQESQVAQQAR	2	3	1	P19035	N-Term(iTRAQ8plex)	0.657522	2	9.80646	0.960234	2	86.9973	0.775882	2	11.5725	0.621791	2	10.5614	0.667667	2	16.6888	61.46	2	2021.05	-1.62343	0
lYTLQDGTQVADVVMNR	2	3	2	W5Q6U0;Q06B57	N-Term(iTRAQ8plex)																61.37	3	2227.17	2.2137	0
iHGFDLAAINLQR	8	7	1	Q9MZY2	N-Term(iTRAQ8plex)	1.94987	4	27.196	2.03872	4	6.12987	2.56386	4	13.3803	2.20428	4	6.26516	1.85861	4	29.6872	60.59	3	1772.01	-2.26326	0
eVELEDQVVTASQSNIcDR	1	1	1	W5PPQ8	N-Term(iTRAQ8plex); C17(Carbamidomethyl)	1.04837	1		0.797983	1		1.07846	1		1.48007	1		1.75545	1		60.58	3	2496.21	-2.81068	0
dIGSESIEDQAmEDAk	3	5	1	P04653	N-Term(iTRAQ8plex); M12(Oxidation); K16(iTRAQ8plex)	3.84971	3	16.6061	1.28733	3	15.2997	0.696627	3	1.26257	1.43803	3	3.90024	0.980762	3	11.2307	60.57	3	2362.15	-1.08498	0
vYSYYNLDETcIR	2	5	1	Q2UVX4	N-Term(iTRAQ8plex); C11(Carbamidomethyl)	0.858901	2	17.7153	1.40846	2	20.9497	1.12618	2	8.42166	1.1589	2	2.99949	1.10875	2	10.5856	60.54	2	1999.98	1.9507	0
qSLEASLAETEGR	1	5	1	S9WUY9	N-Term(iTRAQ8plex)	3.12992	1		1.21251	1		2.08702	1		2.69063	1		4.26602	1		60.27	2	1694.88	-1.66433	0
lIPLQPSQGVP	9	13	2	W5NPT7;Q2TJL6	N-Term(iTRAQ8plex)																59.79	2	1452.87	-1.73067	0
dTNTFVHGNSDDIR	4	1	1	W5PTZ8	N-Term(iTRAQ8plex)	1.06474	4	16.9137	1.10826	4	4.39911	1.29137	4	13.6207	1.39959	4	32.3438	1.67238	4	39.3652	59.79	2	1894.92	1.03812	0
iLLQGTPVAEmAEDAIDGER	2	1	1	O46544	N-Term(iTRAQ8plex); M11(Oxidation)	0.669261	2	38.6543	0.764025	2	6.52779	0.7016	2	33.573	0.72359	2	40.5831	0.734616	2	41.6698	59.14	2	2448.25	-4.64488	0
lVASTQAALA	40	5	2	P14639;X2GM95	N-Term(iTRAQ8plex)																58.87	2	1248.74	-2.56063	0
sSYTcEVTHEGSTVTk	84	1	1	W5PSQ7	N-Term(iTRAQ8plex); C5(Carbamidomethyl); K16(iTRAQ8plex)	0.315874	84	40.44	0.275565	84	48.9051	0.335195	84	41.5728	0.290803	84	53.2107	0.308606	84	60.2787	58.87	2	2394.21	0.143492	0
lGcGEGGcGAcTVMLSk	11	9	1	W5PMT0	N-Term(iTRAQ8plex); C3(Carbamidomethyl); C8(Carbamidomethyl); C11(Carbamidomethyl); K17(iTRAQ8plex)	0.967425	11	13.1928	0.789321	11	13.2243	0.836019	11	15.2663	0.860456	11	14.3146	0.898351	11	25.0195	58.8	3	2365.16	-1.36661	0
vVSALPIQHQDWTGGk	53	2	1	L8HKR7	N-Term(iTRAQ8plex); K16(iTRAQ8plex)	0.285896	53	68.8178	0.229086	53	101.041	0.244456	53	76.4164	0.23379	53	88.9587	0.250094	53	88.5172	58.74	2	2344.33	4.43475	0
lFVSGAcDASAk	3	4	1	A7E3V7	N-Term(iTRAQ8plex); C7(Carbamidomethyl); K12(iTRAQ8plex)	0.67369	3	8.52457	0.674349	3	10.6748	0.762232	3	8.48149	0.757772	3	2.57255	0.62732	3	7.27197	58.58	3	1834	-0.665477	0
eYEATLEDccAk	45	5	2	P14639;X2GM95	N-Term(iTRAQ8plex); C9(Carbamidomethyl); C10(Carbamidomethyl); K12(iTRAQ8plex)																58.4	2	2097.01	-0.37914	0
kAPQVSTPTLVEISR	59	3	1	P14639	N-Term(iTRAQ8plex); K1(iTRAQ8plex)	0.943547	59	17.8911	0.941332	59	25.0443	1.36252	59	20.4215	1.03458	59	24.4027	1.21178	59	27.5859	58.21	3	2234.33	-2.60964	1
sAEEQLHSMk	224	8	3	D2DRB7;P04653;Q8MIH4	N-Term(iTRAQ8plex); K10(iTRAQ8plex)																58.19	2	1767.95	-1.80618	0
dSYVGDEAQSk	2	39	1	A1E0X2	N-Term(iTRAQ8plex); K11(iTRAQ8plex)	0.412384	2	0.753112	0.674904	2	19.1202	0.364127	2	11.7849	0.317518	2	33.3438	0.402863	2	17.3283	57.99	2	1806.93	0.151548	0
ccESASEDcMPk	1	2	1	W5PTG9	N-Term(iTRAQ8plex); C1(Carbamidomethyl); C2(Carbamidomethyl); C9(Carbamidomethyl); K12(iTRAQ8plex)	0.67807	1		0.926498	1		1.10913	1		0.885516	1		0.814698	1		57.89	2	2081.92	-3.01367	0
eTIQGITDPLLk	31	8	1	W5PJR5	N-Term(iTRAQ8plex); K12(iTRAQ8plex)	1.23749	31	14.4816	2.13017	31	25.7392	1.15279	31	21.4337	1.677	31	24.8625	2.37761	31	28.9722	57.8	3	1936.15	-4.81047	0
lGcGEGGcGAcTVmLSk	2	9	1	W5PMT0	N-Term(iTRAQ8plex); C3(Carbamidomethyl); C8(Carbamidomethyl); C11(Carbamidomethyl); M14(Oxidation); K17(iTRAQ8plex)	1.00182	2	40.857	0.828593	2	32.674	0.803125	2	36.4803	0.754914	2	19.6743	0.790878	2	28.5334	57.53	3	2381.15	0.137273	0
tESSTVTPTAPGETR	1	5	1	Q9XT27	N-Term(iTRAQ8plex)	1.17699	1		1.62686	1		1.95	1		1.08961	1		0.997646	1		57.52	2	1837.94	-2.00649	0
lEPQLAVANTYAck	10	12	2	A6ZE99;L8I632	N-Term(iTRAQ8plex); C13(Carbamidomethyl); K14(iTRAQ8plex)																57.49	3	2186.21	-1.97772	0
gVQVETISPGDGR	1	4	1	P18203	N-Term(iTRAQ8plex)	1.09735	1		1.17346	1		0.86362	1		0.876197	1		0.906244	1		57.07	2	1618.86	-5.10558	0
vSETEMDVAk	1	4	1	F1MX50	N-Term(iTRAQ8plex); K10(iTRAQ8plex)	1.38602	1		1.46255	1		1.49846	1		1.03997	1		1.1879	1		56.78	2	1716.93	0.0745164	0
sGGSTTSQSPGLEMcVPDR	2	2	1	C8BKD1	N-Term(iTRAQ8plex); C15(Carbamidomethyl)	1.04311	2	30.0797	0.996266	2	14.0316	1.03704	2	14.3646	0.689906	2	0.223161	0.61842	2	3.65238	56.55	2	2270.08	3.37906	0
gQETISQLHSNFNLIELAR	1	1	1	A6ZE99	N-Term(iTRAQ8plex)	0.970049	1		0.71437	1		0.720908	1		0.685526	1		0.68326	1		56.48	3	2474.32	-2.81684	0
qVELALWDTAGQEDYDR	2	11	1	P61585	N-Term(iTRAQ8plex)	0.962625	2	30.0234	0.980102	2	10.9908	0.736148	2	13.6888	0.960826	2	18.9948	0.883337	2	11.9842	56.25	3	2313.13	0.254686	0
tcVADESHAGcDk	35	3	1	P14639	N-Term(iTRAQ8plex); C2(Carbamidomethyl); C11(Carbamidomethyl); K13(iTRAQ8plex)	0.905301	35	12.1163	1.03189	35	14.6353	1.7266	35	22.178	1.10624	35	17.8129	1.14507	35	14.9085	56.06	2	2057.97	-6.60005	0
nTDGSGQVIVSLGVPR	2	1	1	W5NUX8	N-Term(iTRAQ8plex)	1.45651	2	13.2894	1.29965	2	7.79595	1.03747	2	40.4663	0.936986	2	39.4798	0.714071	2	3.53982	55.82	2	1903.06	0.898026	0
tPEVDNEALEk	207	3	1	P67975	N-Term(iTRAQ8plex); K11(iTRAQ8plex)	0.868585	207	15.5876	0.87064	206	39.1219	1.17655	207	49.5162	1.63595	207	38.0315	1.59941	207	40.9414	55.62	2	1853	-3.68546	0
vTYEDLPAIITIEDAIk	6	10	1	W5PMT0	N-Term(iTRAQ8plex); K17(iTRAQ8plex)	0.86786	6	8.89396	0.663771	6	2.0247	0.582912	6	13.3725	0.675547	6	11.074	0.694381	6	27.5176	55.51	3	2512.43	-1.20845	0
aLLEMQQMk	12	1	1	W5Q5H8	N-Term(iTRAQ8plex); K9(iTRAQ8plex)	1.50936	12	11.7754	1.84039	12	15.5585	1.65505	12	20.7146	1.21386	12	22.2825	1.16047	12	12.7128	55.33	3	1699.96	-3.07225	0
sLFPPASEVVkP	79	3	1	A5JSS7	N-Term(iTRAQ8plex); K11(iTRAQ8plex)	1.08592	79	13.9704	0.97813	79	18.1449	1.30386	79	17.8548	2.07367	79	24.3223	1.99957	79	27.5218	54.93	3	1879.11	-2.75446	0
tPEVDDEALEk	42	7	1	G5E5H7	N-Term(iTRAQ8plex); K11(iTRAQ8plex)	0.796614	42	12.4114	0.79544	42	35.1521	1.21728	42	36.069	1.45914	42	23.5456	1.43214	42	30.8755	54.92	2	1853.99	-2.0435	0
eEVPAADLSDQVPDTESETk	7	5	2	W5NPK5;Q2UVX4	N-Term(iTRAQ8plex); K20(iTRAQ8plex)																54.92	3	2768.37	-6.72606	0
gAATGVNVVcSLR	2	3	1	W5PU70	N-Term(iTRAQ8plex); C10(Carbamidomethyl)	1.09462	2	19.5786	1.51787	2	36.5741	1.42676	2	38.4906	1.2686	2	60.3601	1.71623	2	55.3168	54.87	2	1607.88	-2.68488	0
qTALVELLk	26	11	3	P14639;P02769;X2GM95	N-Term(iTRAQ8plex); K9(iTRAQ8plex)																54.87	2	1623.03	-2.82251	0
qAQQAMDAHLQR	4	2	1	W5PZI1	N-Term(iTRAQ8plex)	1.03294	4	14.0586	2.34279	4	18.2813	0.797529	4	27.7358	0.656732	4	20.8001	0.698826	4	17.572	54.74	3	1700.88	-2.92197	0
gLIDEVNQDFTGR	2	1	1	W5Q5H8	N-Term(iTRAQ8plex)	1.90234	2	53.5334	2.03021	2	60.5224	2.01047	2	73.2236	1.11317	2	62.0076	0.953005	2	58.0654	54.74	3	1767.92	-1.16783	0
vPLSDSGmYVcQAGDDAk	8	1	1	W5P9V5	N-Term(iTRAQ8plex); M8(Oxidation); C11(Carbamidomethyl); K18(iTRAQ8plex)	0.733905	8	19.4565	0.640801	8	18.5838	0.735648	8	11.6105	1.18185	8	13.0348	1.02858	8	12.1529	54.73	3	2537.24	-1.82143	0
gLGDVDQLVk	19	13	1	A0FI82	N-Term(iTRAQ8plex); K10(iTRAQ8plex)	1.45252	19	19.9038	1.11714	19	8.32317	1.42718	19	13.2477	2.04399	19	16.4453	1.77149	19	15.5326	54.56	2	1651.98	-1.32825	0
vPLSDSGMYVcQAGDDAk	14	1	1	W5P9V5	N-Term(iTRAQ8plex); C11(Carbamidomethyl); K18(iTRAQ8plex)	0.771059	14	15.976	0.654751	14	8.49276	0.799681	14	19.3142	1.15756	14	16.7683	1.08661	14	15.4804	54.3	3	2521.24	-3.38989	0
mMQLMSSGVENALTR	3	1	1	A6ZE99	N-Term(iTRAQ8plex)	1.14862	3	27.831	1.19241	3	10.2739	1.04351	3	17.621	1.2207	3	13.4128	1.14994	3	28.5239	54.23	3	1971.99	-4.65382	0
vSITcSGSSSNIGR	6	1	1	Q1RMN8	N-Term(iTRAQ8plex); C5(Carbamidomethyl)	0.412342	6	22.6458	0.282994	6	34.7225	0.354388	6	45.2385	0.404139	6	32.4509	0.365475	6	52.1646	54.08	2	1728.88	-1.58566	0
vGINYWLAHk	76	13	1	P00712	N-Term(iTRAQ8plex); K10(iTRAQ8plex)	1.19839	76	17.2264	1.11082	75	20.9069	1.49546	76	17.7377	1.78079	76	32.6439	1.41044	76	19.1095	53.97	3	1809.05	-4.56401	0
sNVYLQVLEPEPELVYR	2	1	1	W5P9V5	N-Term(iTRAQ8plex)	0.687625	2	0.353101	0.761607	2	8.48122	0.916692	2	5.92948	1.35291	2	1.13478	1.14934	2	4.04223	53.95	2	2352.27	-1.2953	0
lGVEFDETTADDR	6	14	1	C0LSL0	N-Term(iTRAQ8plex)	1.23403	6	6.33562	1.53733	6	19.5421	1.3441	6	5.49551	1.11683	6	25.0628	1.11259	6	21.3847	53.92	3	1771.86	-1.21908	0
aSSIMDELFQDR	5	3	1	W5PZI1	N-Term(iTRAQ8plex)	0.847494	5	3.52192	2.03382	5	14.9587	0.897352	5	18.6353	0.646032	5	57.7995	0.487474	5	94.1847	53.73	2	1715.85	-2.66128	0
fVVAPFPEVFR	289	13	4	D2DRB7;P04653;Q8MIH4;Q69EZ6	N-Term(iTRAQ8plex)																53.66	3	1611.92	-2.28629	0
aAQNLLAcGAAR	8	1	1	W5PLB7	N-Term(iTRAQ8plex); C8(Carbamidomethyl)	0.527386	8	18.8938	0.397137	8	48.8202	0.254839	8	48.2655	0.23253	8	52.5926	0.261273	8	37.1022	53.64	3	1519.83	-1.2223	0
dSVTSTITGVVDR	14	3	1	A6ZE99	N-Term(iTRAQ8plex)	0.929479	14	22.7409	0.799218	14	25.9632	0.662415	14	16.3954	0.650878	14	40.6584	0.705713	14	27.8006	53.63	3	1653.9	-0.571709	0
nAGPFTPTVNR	136	8	3	E7BQS5;P04654;E7BQS3	N-Term(iTRAQ8plex)																53.26	3	1477.8	-1.06646	0
sIcSTTNIQck	5	4	1	W5PTS4	N-Term(iTRAQ8plex); C3(Carbamidomethyl); C10(Carbamidomethyl); K11(iTRAQ8plex)	1.30776	5	19.2128	1.70907	5	7.74744	2.25234	5	12.6706	2.62212	5	11.5368	3.15924	5	11.0606	53.23	2	1920.01	-1.434	0
iPAFGSIPTEFR	7	10	2	W5PMT0;S9Y4T1	N-Term(iTRAQ8plex)																53.07	3	1638.92	-0.370397	0
eALQGITDPLFk	7	3	1	P42819	N-Term(iTRAQ8plex); K12(iTRAQ8plex)	1.5602	7	17.2106	1.21513	7	38.3044	0.906588	7	10.3199	1.22574	7	6.41314	1.17976	7	42.7719	53.04	3	1940.13	1.88213	0
vLTQPSSVSGSLGQR	3	1	1	G3N2D7	N-Term(iTRAQ8plex)	0.315781	3	35.7031	0.261173	3	16.6538	0.284704	3	48.8146	0.252477	3	6.44181	0.177332	3	13.947	53	2	1820.01	-2.47029	0
ePQVYVLAPPQEELSk	115	2	1	W5PH95	N-Term(iTRAQ8plex); K16(iTRAQ8plex)	0.255622	115	52.7239	0.192001	115	59.5496	0.233803	115	51.1208	0.215505	115	69.6376	0.248776	115	74.9938	52.98	3	2435.36	-0.910598	0
scQDQPTAmAR	102	23	5	P02669;D2SZE0;D2SZC1;D2SZE3;D2SZA9	N-Term(iTRAQ8plex); C2(Carbamidomethyl); M9(Oxidation)																52.88	2	1584.74	-1.28536	0
gGSVTVScPYNPk	11	6	2	W5P9V5;A6QNW3	N-Term(iTRAQ8plex); C8(Carbamidomethyl); K13(iTRAQ8plex)																52.64	2	1974.05	-2.69683	0
yIcDHQDALSSk	48	2	1	P14639	N-Term(iTRAQ8plex); C3(Carbamidomethyl); K12(iTRAQ8plex)	0.957568	48	16.2098	1.33913	48	36.3399	1.57787	48	19.7635	1.12391	48	16.6691	1.20138	48	16.5965	52.57	2	2045.05	-5.04445	0
yAASSYLTLTGSEWk	40	1	1	W5PSQ7	N-Term(iTRAQ8plex); K15(iTRAQ8plex)	0.547452	40	21.9702	0.456657	40	38.5554	0.483148	40	25.3975	0.521596	40	31.9321	0.590505	40	34.3921	52.52	2	2285.22	-5.14942	0
sPAQTLQWQVLPNxVPAk	4	3	1	D2SZE3	N-Term(iTRAQ8plex); X14(S); K18(iTRAQ8plex)	1.18022	4	5.73844	0.919738	4	8.02647	1.34739	4	0.602915	1.37614	4	6.46845	1.86183	4	0.712691	52.5	3	2572.46	-2.46481	0
fDEYFSAGcAPGSQR	2	2	1	W5PF65	N-Term(iTRAQ8plex); C9(Carbamidomethyl)	1.06169	2	21.3016	1.17114	2	42.6414	1.34151	2	47.6827	0.728669	2	7.01125	0.49288	2	31.1628	52.42	2	1995.92	-0.974239	0
sVTEQGAELSNEER	1	9	1	L8J3H9	N-Term(iTRAQ8plex)	0.616878	1		0.896541	1		0.574276	1		0.418384	1		0.440234	1		52.33	2	1852.92	0.0343682	0
mPcTEDYLSLILNR	6	6	2	P14639;P02769	N-Term(iTRAQ8plex); M1(Oxidation); C3(Carbamidomethyl)																52.27	3	2045.03	-1.13611	0
eTIPLQESTLYTQDR	1	6	1	L8I0I4	N-Term(iTRAQ8plex)	0.707912	1		0.456618	1		0.582281	1		0.594917	1		0.570989	1		52.18	2	2098.1	-0.246964	0
dASIILGQEQDAFAGGFDR	1	1	1	W5PD71	N-Term(iTRAQ8plex)	1.09062	1		0.8908	1		0.606755	1		0.693698	1		0.690896	1		51.93	3	2314.16	-2.53369	0
sAEEQLHSmk	93	8	3	D2DRB7;P04653;Q8MIH4	N-Term(iTRAQ8plex); M9(Oxidation); K10(iTRAQ8plex)																51.85	2	1783.94	-5.64545	0
aATLSTQVGQPLLDR	1	2	1	Q7M2U8	N-Term(iTRAQ8plex)	0.52805	1		0.306663	1		0.196324	1		0.177458	1		0.161459	1		51.59	2	1874.07	1.59407	0
aGSSSSSEEIVPNSAEQk	2	6	2	D2DRB7;P04653	N-Term(iTRAQ8plex); K18(iTRAQ8plex)																51.09	3	2415.25	-0.19615	0
dAVTTTVTGAk	9	12	2	A6ZE99;L8I632	N-Term(iTRAQ8plex); K11(iTRAQ8plex)																50.9	2	1671.97	-2.88979	0
lLLSSLEEAk	16	3	1	W5PZI1	N-Term(iTRAQ8plex); K10(iTRAQ8plex)	1.07099	16	11.279	3.08655	16	51.3823	1.03915	16	15.5383	1.2153	16	20.0124	1.06505	16	12.1142	50.82	2	1711.04	-4.0672	0
aLQPTIFPVVPR	1	5	1	W5PCL4	N-Term(iTRAQ8plex)	1.42953	1		1.23296	1		1.20047	1		1.5131	1		1.27961	1		50.58	2	1642	-0.876308	0
iTVDIGTPS	1	7	2	F1SE74;E9NRZ3	N-Term(iTRAQ8plex)																50.43	2	1206.68	-4.09726	0
aLPMHIQLAFNPTQLEGQcHV	12	1	1	Q9XSC0	N-Term(iTRAQ8plex); C19(Carbamidomethyl)	1.19791	12	31.9688	1.77084	12	89.2061	1.45857	12	18.3508	4.47828	12	68.2569	1.64847	12	29.0708	50.32	3	2708.39	-1.80815	0
aPGSASEAFFEQGPTR	1	7	1	Q9XT27	N-Term(iTRAQ8plex)	2.4877	1		1.08379	1		0.879454	1		0.771055	1		0.815142	1		50.08	3	1955.97	-2.42663	0
sVSITcYYPATSVNR	6	1	1	W5P9V5	N-Term(iTRAQ8plex); C6(Carbamidomethyl)	0.960515	6	35.7179	0.995646	6	7.72585	1.29352	6	18.983	1.22174	6	10.4562	1.07331	6	12.772	49.92	2	2022.02	-1.63707	0
eTGGITQLDSFSLDR	1	1	1	W5PU70	N-Term(iTRAQ8plex)	1.98477	1		1.68497	1		2.01049	1		2.05097	1		2.49541	1		49.79	2	1942.99	-4.59883	0
vSITcSGSSSNVGR	7	1	1	G5E604	N-Term(iTRAQ8plex); C5(Carbamidomethyl)	0.3269	7	25.2081	0.199234	7	14.2808	0.229077	7	25.2208	0.206726	7	30.6067	0.222167	7	30.2718	49.64	2	1714.87	-0.872201	0
aGVEVTGNVDSk	3	1	1	W5PID9	N-Term(iTRAQ8plex); K12(iTRAQ8plex)	0.776123	3	1.13392	1.06702	3	10.2488	1.01	3	5.5316	1.23774	3	29.213	1.45197	3	4.23971	49.54	2	1784	1.83787	0
aGSSSSSEEIVPNSAEk	2	1	1	Q69EZ6	N-Term(iTRAQ8plex); K17(iTRAQ8plex)	3.56977	2	11.2322	1.40567	2	4.50941	0.808507	2	31.8913	1.60527	2	12.2729	1.05926	2	11.9563	49.32	3	2287.19	0.480684	0
tPDNIDIWIGGNAEPMVER	2	7	1	Q9MZY2	N-Term(iTRAQ8plex)	1.94852	2	7.86006	1.47004	2	20.0404	2.09011	2	42.3499	1.54649	2	18.1121	1.44755	2	13.4764	49.21	2	2431.23	3.18735	0
gSLGGGFSSGGFSGGSFSR	2	2	1	S9WUY9	N-Term(iTRAQ8plex)	1.49042	2	53.8934	1.0816	2	42.4187	1.05377	2	35.9888	1.2873	2	32.3911	1.45052	2	13.7374	49.18	3	2011.97	-1.67747	0
yIPxQYVLSR	945	106	11	P02669;D2SZC1;D2SZE3;D2SZA9;A0SWQ7;P50420;Q28417;Q9N258;G8FPL3;B6CXY7;Q95MX4	N-Term(iTRAQ8plex); X4(I)																49.05	3	1555.92	1.24233	0
vcTLAIIDPGDSDIIR	1	2	1	L8I3C7	N-Term(iTRAQ8plex); C2(Carbamidomethyl)	1.23059	1		1.14902	1		0.793447	1		0.793195	1		0.716392	1		49.02	3	2062.12	0.695539	0
aYSVLTITER	3	1	1	W5NXW9	N-Term(iTRAQ8plex)	0.609359	3	9.07264	0.453097	3	0.438305	0.33221	3	3.64922	0.314648	3	5.67738	0.341197	3	30.0314	48.92	3	1456.83	-1.2001	0
eQLSTSEENSk	32	17	3	E7BQS5;P04654;E7BQS3	N-Term(iTRAQ8plex); K11(iTRAQ8plex)																48.62	2	1859.97	-7.11113	0
tIDMESTEVFTk	36	8	3	E7BQS5;P04654;E7BQS3	N-Term(iTRAQ8plex); K12(iTRAQ8plex)																48.56	2	2009.07	-0.896535	0
lQESGPSLVk	9	1	1	A2P2I3	N-Term(iTRAQ8plex); K10(iTRAQ8plex)	0.522224	9	32.5942	0.650067	9	18.6111	0.540626	9	12.931	0.739068	9	15.3827	0.656451	9	7.0797	48.54	2	1665.99	-2.86479	0
vDcGYPEVTPEQcNNR	3	4	1	Q30DP5	N-Term(iTRAQ8plex); C3(Carbamidomethyl); C13(Carbamidomethyl)	1.58581	3	2.76943	1.20269	3	61.6831	0.842676	3	23.9289	1.10443	3	30.5575	0.659703	3	1.77318	48.51	3	2242.02	2.39282	0
vAPLGEEFR	5	5	1	W5NX51	N-Term(iTRAQ8plex)	1.4997	5	20.4638	1.12754	5	4.26903	1.30578	5	2.58658	0.829897	5	32.3692	1.10912	5	48.2415	48.43	3	1321.74	-3.06848	0
sTENTEDVQGcDSDk	3	1	1	W5PSD8	N-Term(iTRAQ8plex); C11(Carbamidomethyl); K15(iTRAQ8plex)	1.26682	3	7.12425	0.997677	3	33.2138	1.36342	3	16.4909	1.15984	3	6.27185	0.901189	3	18.4326	48.32	3	2293.07	1.07506	0
qcVPTEAcEDPEDDcGNNFQcGTGR	1	1	1	W5PID9	N-Term(iTRAQ8plex); C2(Carbamidomethyl); C8(Carbamidomethyl); C15(Carbamidomethyl); C21(Carbamidomethyl)	1.47687	1		1.68409	1		2.31491	1		3.46318	1		1.91139	1		48.32	3	3220.3	0.438538	0
aSVETPEQk	2	5	1	W5PWM0	N-Term(iTRAQ8plex); K9(iTRAQ8plex)	0.777637	2	19.6164	0.729806	2	32.4085	0.800195	2	54.8007	0.681835	2	22.9331	0.810502	2	62.6358	48.3	2	1596.9	-2.22324	0
lGEHNIDVLEGNEQFINAAk	6	3	1	P00761	N-Term(iTRAQ8plex); K20(iTRAQ8plex)	0.795976	6	40.256	0.791204	6	25.7327	1.0252	6	16.0034	1.34484	6	10.8729	1.18795	6	4.97959	48.24	4	2819.51	-0.544395	0
ePDSNVIVVDWLSR	2	13	1	A0FI82	N-Term(iTRAQ8plex)	1.49565	2	32.1838	0.909221	2	16.8997	1.24415	2	20.2497	1.83366	2	25.6204	1.62516	2	9.13277	48.16	3	1933.03	-2.68541	0
nIVSDcSAFVk	1	1	1	W5PCL4	N-Term(iTRAQ8plex); C6(Carbamidomethyl); K11(iTRAQ8plex)	0.86387	1		0.977436	1		0.838387	1		1.03214	1		0.841188	1		48.13	3	1848.01	-3.2447	0
vPcFQAGDSR	6	2	1	Q9MZY2	N-Term(iTRAQ8plex); C3(Carbamidomethyl)	1.47078	6	10.442	1.32945	6	17.8078	1.96232	6	13.2359	1.45468	6	23.2113	1.44926	6	19.8718	48.04	2	1440.72	-3.37845	0
dAGTIAGLNVLR	2	2	1	P19120	N-Term(iTRAQ8plex)	0.694157	2	9.69604	0.765702	2	6.7681	0.652734	2	22.9179	0.542904	2	9.63349	0.517039	2	22.9036	47.82	3	1503.88	-1.87921	0
mWVTGVVTQGASR	10	9	3	W5PNP1;Q95114;G5CC03	N-Term(iTRAQ8plex)																47.74	3	1695.91	-1.36281	0
qPmIAVNQELAYFYPQLFR	10	9	4	D2DRB7;P04653;Q8MIH4;Q69EZ6	N-Term(iTRAQ8plex); M3(Oxidation)																47.72	3	2648.38	-0.543462	0
sLVLTTPWIGDER	1	3	1	E1BGX8	N-Term(iTRAQ8plex)	1.35617	1		1.52117	1		1.18969	1		1.17734	1		1.22962	1		47.66	2	1790.99	-0.500764	0
scQDQPTxMAR	200	23	5	D2SZA9;P02669;D2SZE0;D2SZC1;D2SZE3	N-Term(iTRAQ8plex); C2(Carbamidomethyl); X8(A)																47.62	2	1568.74	-3.06145	0
lAVYQAGASEGAER	2	6	1	Q7M2U8	N-Term(iTRAQ8plex)	0.653911	2	22.9591	0.652914	2	58.0102	0.360643	2	11.7169	0.308639	2	33.874	0.31432	2	36.3885	47.62	2	1725.9	-3.7991	0
nIcxIScDk	110	5	2	Q69B46;P00712	N-Term(iTRAQ8plex); C3(Carbamidomethyl); X4(N); C7(Carbamidomethyl); K9(iTRAQ8plex)																47.6	2	1731.89	-1.94153	0
vFALSTNLIAIDSR	2	2	2	W5NPK5;O46544	N-Term(iTRAQ8plex)																47.51	2	1824.05	-2.09162	0
eLALcYGGMADR	5	8	2	W5PMT0;S9Y4T1	N-Term(iTRAQ8plex); C5(Carbamidomethyl)																47.42	3	1659.81	-0.0931341	0
iYFAAEDTDccTR	1	5	1	I3LGQ1	N-Term(iTRAQ8plex); C10(Carbamidomethyl); C11(Carbamidomethyl)	0.808619	1		0.520294	1		0.345133	1		0.312013	1		0.223799	1		47.38	2	1925.87	-1.04534	0
sIDVSEAQk	11	7	1	W5PMT0	N-Term(iTRAQ8plex); K9(iTRAQ8plex)	0.919864	11	16.5995	1.08939	11	25.7816	0.736722	11	35.9375	0.789947	11	25.3004	0.721614	11	40.5323	47.3	2	1584.89	-7.40051	0
sEQSDLSFSk	17	13	1	A4ZVY6	N-Term(iTRAQ8plex); K10(iTRAQ8plex)	1.29278	17	17.2269	1.09532	17	13.7153	1.33384	17	32.9269	1.83411	17	27.9768	1.69606	17	24.5049	47.3	2	1735.93	-2.86741	0
fSSAETTEMSGk	1	3	1	L8HQV0	N-Term(iTRAQ8plex); K12(iTRAQ8plex)	0.649233	1		0.499844	1		0.608281	1		0.605933	1		1.24053	1		47.15	2	1882.96	-1.55182	0
wLSTSIPESQWQESLAR	1	2	1	W5Q6U0	N-Term(iTRAQ8plex)	1.07369	1		1.41114	1		0.977563	1		0.947794	1		0.822289	1		46.98	2	2322.21	1.55602	0
nADPETTLLAYLR	9	11	1	W5PMT0	N-Term(iTRAQ8plex)	0.865241	9	10.965	0.769997	9	7.67009	0.686622	9	17.8244	0.697932	9	7.12133	0.699298	9	15.1673	46.93	3	1780.97	-2.02014	0
aNQVTDESLESTR	1	4	1	L8I2N6	N-Term(iTRAQ8plex)	0.716249	1		0.45669	1		0.398139	1		0.351032	1		0.341611	1		46.87	2	1753.88	-1.60126	0
tGIPIVTSPYQIHFTk	1	7	3	Q2UVX4;S9XDK9;W5NRI1	N-Term(iTRAQ8plex); K16(iTRAQ8plex)																46.85	3	2410.39	-2.908	0
sPAQTxQWQVLPNAVPAk	59	1	1	D2SZC1	N-Term(iTRAQ8plex); X6(N); K18(iTRAQ8plex)	1.14258	59	11.1863	1.134	59	27.6686	1.55302	59	26.7403	1.65629	59	25.688	2.00684	59	30.7938	46.85	3	2557.45	7.39256	0
qTEDELQDk	3	1	1	D7NJ85	N-Term(iTRAQ8plex); K9(iTRAQ8plex)	1.10938	3	15.4848	1.14439	3	6.07619	1.82133	3	13.2476	1.70473	3	12.889	2.08266	3	14.3626	46.66	2	1713.91	-1.63503	0
vTWIQSSTLk	20	3	1	W5PMT0	N-Term(iTRAQ8plex); K10(iTRAQ8plex)	0.866275	20	10.6401	0.782388	20	12.3529	0.772467	20	8.27476	0.942263	20	12.7052	0.841611	20	11.875	46.65	2	1771.06	0.970227	0
dcGSGVGVIk	2	2	1	W5NSH8	N-Term(iTRAQ8plex); C2(Carbamidomethyl); K10(iTRAQ8plex)	0.815702	2	3.15348	0.769779	2	15.1182	0.705899	2	15.9801	1.26786	2	18.2869	0.963125	2	19.9933	46.47	2	1599.89	-3.58618	0
tDGDGVYTFNSk	2	2	1	W5P0Q4	N-Term(iTRAQ8plex); K12(iTRAQ8plex)	2.94973	2	2.19936	3.76742	2	57.6186	1.55424	2	42.8827	0.901705	2	9.739	0.902729	2	59.7341	46.33	2	1911.99	-3.04309	0
vNVPGSQAQLk	1	5	1	F1RIP6	N-Term(iTRAQ8plex); K11(iTRAQ8plex)	0.729714	1		0.69032	1		0.796532	1		1.06085	1		0.872002	1		46.32	2	1749.05	-0.64079	0
vLVLDTDYkk	184	20	3	P67975;B2YKY6;G5E5H7	N-Term(iTRAQ8plex); K9(iTRAQ8plex); K10(iTRAQ8plex)																46.31	2	2106.28	-6.83519	1
vELLGc	4	11	3	W5PNP1;Q95114;G5CC03	N-Term(iTRAQ8plex); C6(Carbamidomethyl)																46.3	2	994.554	-0.914852	0
qTVAVGVIk	1	26	1	E1BED8	N-Term(iTRAQ8plex); K9(iTRAQ8plex)	0.81587	1		1.14944	1		1.05783	1		0.594728	1		0.610963	1		46.24	2	1522.98	-0.562754	0
eTYGDmADccEk	9	6	3	P14639;P02769;X2GM95	N-Term(iTRAQ8plex); M6(Oxidation); C9(Carbamidomethyl); C10(Carbamidomethyl); K12(iTRAQ8plex)																46.09	2	2102.93	0.143855	0
gccQEEAQFETk	1	8	1	S9Y209	N-Term(iTRAQ8plex); C2(Carbamidomethyl); C3(Carbamidomethyl); K12(iTRAQ8plex)	0.823622	1		0.888116	1		0.752131	1		0.839896	1		0.867325	1		46.08	3	2095.01	1.39861	0
vYVEELkPTPEGNLEILLQk	52	6	1	P67975	N-Term(iTRAQ8plex); K7(iTRAQ8plex); K20(iTRAQ8plex)	0.790642	52	22.4095	0.805865	52	21.7017	1.0691	52	18.2424	1.57651	52	16.2741	1.56755	52	20.1357	45.97	3	3224.9	1.7769	0
eNINELSk	122	13	4	D2DRB7;P04653;Q8MIH4;Q69EZ6	N-Term(iTRAQ8plex); K8(iTRAQ8plex)																45.92	2	1554.88	-6.63348	0
aDFTDVTk	37	3	1	P14639	N-Term(iTRAQ8plex); K8(iTRAQ8plex)	0.925758	37	16.9687	1.1185	37	25.4644	1.6034	37	41.498	1.22412	37	16.7094	1.34821	37	27.9072	45.83	3	1504.84	-3.63466	0
vSLVEDHIAEGSVAVR	19	7	1	W5NPT7	N-Term(iTRAQ8plex)	1.26801	19	16.1873	1.03318	19	16.7382	1.02487	19	11.3844	1.04511	19	22.2337	1.20912	19	13.9131	45.65	3	1985.1	-0.314177	0
eGMNIVEAMER	1	7	1	Q864L8	N-Term(iTRAQ8plex)	0.966953	1		1.07424	1		0.774451	1		0.675964	1		0.64039	1		45.56	2	1582.78	-3.45436	0
vDcTANTNTcNk	1	5	1	W5PMM7	N-Term(iTRAQ8plex); C3(Carbamidomethyl); C10(Carbamidomethyl); K12(iTRAQ8plex)	0.611163	1		0.651721	1		0.484753	1		0.612594	1		0.607111	1		45.06	3	2005.98	-2.97652	0
nANTFISPQQR	5	3	1	W5QHS2	N-Term(iTRAQ8plex)	0.923097	5	7.05385	0.605622	5	24.2003	0.31445	5	14.707	0.497518	5	12.2211	0.409221	5	20.3406	44.96	2	1579.85	-0.629826	0
nEEDDMVEMEEER	1	5	1	W5P1C2	N-Term(iTRAQ8plex)	1.4825	1		0.931555	1		1.30745	1		1.59421	1		1.28154	1		44.96	2	1958.82	-0.785543	0
eSASVTcLVk	11	2	1	W5NXW9	N-Term(iTRAQ8plex); C7(Carbamidomethyl); K10(iTRAQ8plex)	0.618621	11	28.6796	0.423914	11	34.6687	0.338534	11	53.9282	0.362541	11	43.5646	0.37622	11	82.8221	44.57	2	1701.97	-0.547326	0
vSPAVFVSR	10	7	1	W5NPT7	N-Term(iTRAQ8plex)	0.949226	10	6.69453	0.773805	10	15.877	0.763897	10	16.0834	0.709129	10	20.8732	0.738801	10	21.7851	44.31	3	1265.75	-0.502002	0
aGFVcPTPPYQSLAR	4	7	1	Q9MZY2	N-Term(iTRAQ8plex); C5(Carbamidomethyl)	1.76495	4	4.68248	1.42318	4	14.5682	1.87766	4	73.4668	1.20058	4	30.8334	1.51067	4	58.7306	44.31	2	1968.03	0.261541	0
eTYGDMADccEk	23	6	3	P14639;P02769;X2GM95	N-Term(iTRAQ8plex); C9(Carbamidomethyl); C10(Carbamidomethyl); K12(iTRAQ8plex)																44.1	2	2086.93	-0.887808	0
dFLQTENEGNAIDELk	3	1	1	W5PZJ1	N-Term(iTRAQ8plex); K16(iTRAQ8plex)	1.02567	3	3.98088	0.882566	3	12.5292	1.0877	3	8.65595	1.70325	3	9.18343	2.00165	3	16.6783	44.1	3	2444.27	-1.89239	0
aVTEQGAELSNEER	1	5	1	Q3SZI4	N-Term(iTRAQ8plex)	0.607593	1		0.744877	1		0.489485	1		0.471164	1		0.421916	1		44.07	2	1836.92	-1.4072	0
eNFITFAk	24	1	1	W5PMH6	N-Term(iTRAQ8plex); K8(iTRAQ8plex)	1.32608	24	25.8646	1.11239	24	16.1665	1.72306	24	26.2658	2.13563	24	18.653	2.10419	24	27.2116	44.05	2	1577.91	-3.35879	0
rNAGPFTPTVNR	9	8	3	E7BQS5;P04654;E7BQS3	N-Term(iTRAQ8plex)																44.02	3	1633.91	-0.376231	1
vAYSDDGVTWTEYkDPETSk	2	4	2	W5PNP1;G5CC03	N-Term(iTRAQ8plex); K14(iTRAQ8plex); K20(iTRAQ8plex)																43.71	4	3203.65	-1.1136	1
nMAIHPR	123	7	3	E7BQS5;P04654;E7BQS3	N-Term(iTRAQ8plex)																43.64	3	1142.63	-4.96128	0
lAFNPTQLE	4	1	1	B2YKY6	N-Term(iTRAQ8plex)	0.964697	4	15.5459	1.01394	4	28.2043	0.939258	4	49.4581	1.20485	4	39.0398	1.38755	4	32.0738	43.54	2	1336.74	-1.4152	0
lIVTQTMk	720	2	1	P67975	N-Term(iTRAQ8plex); K8(iTRAQ8plex)	0.921269	357	14.0234	0.908051	355	28.6119	1.17841	355	34.1133	1.72396	357	25.0722	1.77714	357	25.3792	43.43	2	1541.95	-2.86031	0
tVTINcPFTSANSQk	10	2	1	W5P9V5	N-Term(iTRAQ8plex); C6(Carbamidomethyl); K15(iTRAQ8plex)	0.726236	10	25.4044	0.766146	10	7.89233	0.923541	10	17.5061	1.15225	10	11.4132	1.10405	10	14.275	43.31	3	2276.21	-2.76164	0
dFLGLSEIk	15	4	1	W5P0U4	N-Term(iTRAQ8plex); K9(iTRAQ8plex)	1.00798	15	9.86118	1.04769	15	7.96808	1.15221	15	16.0337	1.26657	15	10.1795	1.18813	15	13.0842	43.29	3	1629.96	-2.18048	0
aLPMHIR	213	13	3	P67975;B2YKY6;G5E5H7	N-Term(iTRAQ8plex)																43.2	3	1141.68	-1.33211	0
nIcDIScDk	38	5	1	Q69B46	N-Term(iTRAQ8plex); C3(Carbamidomethyl); C7(Carbamidomethyl); K9(iTRAQ8plex)	1.57559	19	15.413	1.39266	19	24.3288	2.1314	19	17.3062	2.59559	19	20.0376	1.78555	19	19.905	43.09	2	1732.88	-1.24246	0
tDVGAPVSGPGIPGR	3	1	1	Q29411	N-Term(iTRAQ8plex)	1.4598	3	77.7075	1.59514	3	5.48727	0.603649	3	14.8456	0.608774	3	25.6365	0.765224	3	44.3412	43	3	1683.93	-1.26898	0
aLPmHIR	85	13	3	P67975;B2YKY6;G5E5H7	N-Term(iTRAQ8plex); M4(Oxidation)																42.97	3	1157.67	-3.30068	0
iDALNENk	143	15	2	P67975;G5E5H7	N-Term(iTRAQ8plex); K8(iTRAQ8plex)																42.93	2	1524.88	-6.00292	0
eGDLTHFNQR	6	7	2	W5PMT0;S9Y4T1	N-Term(iTRAQ8plex)																42.89	3	1520.77	-3.72442	0
sLINDYVk	6	17	2	W5Q0X5;W5Q124	N-Term(iTRAQ8plex); K8(iTRAQ8plex)																42.84	3	1559.92	-0.739681	0
gSQPGNAEGLQk	1	1	1	W5NWM2	N-Term(iTRAQ8plex); K12(iTRAQ8plex)	0.788235	1		1.27021	1		1.57313	1		1.36749	1		1.20681	1		42.72	3	1793.99	-1.29569	0
tESTVEDLk	8	1	1	W5PY10	N-Term(iTRAQ8plex); K9(iTRAQ8plex)	1.49123	8	61.1581	2.05528	8	62.6879	2.24268	8	60.7845	3.8794	8	59.5271	3.91373	8	47.0781	42.67	2	1629.92	1.43135	0
eGNPAHQk	67	9	4	D2DRB7;P04653;Q8MIH4;Q69EZ6	N-Term(iTRAQ8plex); K8(iTRAQ8plex)																42.61	2	1488.83	-6.70517	0
eNQSVPLESk	3	1	1	W5PY10	N-Term(iTRAQ8plex); K10(iTRAQ8plex)	1.20827	3	21.0202	1.37714	3	10.7881	1.84413	3	7.30204	2.07919	3	4.82774	2.48569	3	19.6537	42.51	2	1738.97	-5.76852	0
tPLPLAGPPR	11	17	2	W5NPT7;Q2TJL6	N-Term(iTRAQ8plex)																42.37	3	1322.81	-2.14041	0
aIVTDGDLPk	2	1	1	W5P559	N-Term(iTRAQ8plex); K10(iTRAQ8plex)	1.30744	2	8.33228	1.24534	2	8.88654	1.04998	2	11.5944	4.30099	2	8.13793	1.26515	2	7.63993	42.29	3	1636.97	-0.170963	0
tPDEEGLFTVR	26	2	1	W5NPT7	N-Term(iTRAQ8plex)	1.0246	26	11.4918	0.859955	26	12.1446	0.858186	26	22.6479	0.826945	26	31.9593	0.770111	26	31.0329	42.17	3	1567.83	1.0627	0
lSFmAIPPk	15	16	1	Q28417	N-Term(iTRAQ8plex); M4(Oxidation); K9(iTRAQ8plex)	1.11037	15	25.6199	1.18597	15	30.1615	1.41586	15	15.4293	2.03219	15	47.2314	2.08578	15	46.8431	42.15	3	1627.97	-0.00512237	0
vITDPFTk	6	9	1	W5PCT4	N-Term(iTRAQ8plex); K8(iTRAQ8plex)	0.943646	6	3.57861	0.886269	6	3.90301	0.895796	6	7.5092	0.994678	6	6.99906	0.76952	6	23.3081	42.11	2	1528.92	-2.34162	0
fAWPQYLk	224	11	3	E7BQS5;P04654;E7BQS3	N-Term(iTRAQ8plex); K8(iTRAQ8plex)																42.09	2	1660.96	-3.25942	0
vVEVLAGDGQLYSR	1	7	2	W5Q6U0;Q06B57	N-Term(iTRAQ8plex)																42.02	2	1810	-2.15428	0
dVAMkPPSVYVLPPTR	13	1	1	W5NXW9	N-Term(iTRAQ8plex); K5(iTRAQ8plex)	0.549233	13	12.9017	0.388554	13	28.0339	0.326854	13	26.8466	0.404993	13	39.9084	0.426663	13	35.513	41.92	2	2378.38	2.23513	0
tFQDAQQVcTQAGGQLPSPR	1	3	1	Q9XSQ2	N-Term(iTRAQ8plex); C9(Carbamidomethyl)	1.40887	1		1.22206	1		1.53817	1		1.65906	1		1.99439	1		41.87	3	2493.25	0.235748	0
yAMVYGYNAAYDR	2	2	1	W5QHS2	N-Term(iTRAQ8plex)	0.621025	2	8.01623	0.611374	2	26.4609	0.472998	2	8.96092	0.504384	2	9.15651	0.471597	2	11.9321	41.77	3	1860.89	0.0457195	0
qITASSYYk	7	11	3	W5PNP1;Q95114;G5CC03	N-Term(iTRAQ8plex); K9(iTRAQ8plex)																41.72	2	1668.94	-1.67228	0
dDPHAcYATVFDk	19	2	1	X2GM95	N-Term(iTRAQ8plex); C6(Carbamidomethyl); K13(iTRAQ8plex)	0.909979	19	18.8248	0.804814	19	15.6378	1.298	19	14.5127	1.06199	19	17.7548	0.933651	19	18.3238	41.52	3	2147.06	-2.77401	0
eAQSQLVk	2	4	1	L8I378	N-Term(iTRAQ8plex); K8(iTRAQ8plex)	0.851439	2	52.3805	0.900257	2	7.1299	0.94583	2	41.889	1.22813	2	73.3145	1.44148	2	66.7176	41.49	2	1510.9	-2.08505	0
nLLLGQEk	16	10	1	W5NPT7	N-Term(iTRAQ8plex); K8(iTRAQ8plex)	1.11635	16	12.9447	1.00732	16	8.04749	1.14394	16	5.83207	1.14452	16	8.92949	1.10789	16	9.82331	41.49	2	1522.94	-3.68023	0
sPAQTLQWQVLPNxVPAk	2	3	1	D2SZE3	N-Term(iTRAQ8plex); X14(M); K18(iTRAQ8plex)	0.56791	2	51.3674	0.685262	2	139.789	1.19172	2	212.683	0.676974	2	74.257	1.1876	2	231.818	41.46	3	2616.46	-5.91716	0
mPEDcVPTFR	1	3	1	W5PSD8	N-Term(iTRAQ8plex); M1(Oxidation); C5(Carbamidomethyl)	1.49679	1		1.12045	1		1.29024	1		1.0466	1		0.912312	1		41.36	2	1571.74	-8.28015	0
mSAVTGPVPR	4	1	1	W5Q5H8	N-Term(iTRAQ8plex)	1.43409	4	25.9619	1.7648	4	34.7201	1.68167	4	11.405	1.13401	4	14.6793	1.13262	4	4.19338	41.29	3	1318.74	-1.30674	0
gLPAPIVR	4	3	2	W5PH95;L8HKR7	N-Term(iTRAQ8plex)																41.28	3	1126.72	-1.46399	0
eGcFVLEGPk	36	2	1	P14639	N-Term(iTRAQ8plex); C3(Carbamidomethyl); K10(iTRAQ8plex)	1.07733	36	18.1899	1.17202	36	9.0697	1.66272	36	31.9794	1.72531	36	26.7548	1.67491	36	23.7557	41.27	2	1743.95	-3.5842	0
iIPGFMcQGGDFTR	2	14	1	Q864L8	N-Term(iTRAQ8plex); C7(Carbamidomethyl)	0.645185	2	46.2525	0.595195	2	49.773	0.464189	2	65.639	0.436771	2	58.1357	0.452645	2	47.1151	41.2	3	1902.95	0.863114	0
vAVSADPNVPNVVVTR	1	5	1	Q7M2Q9	N-Term(iTRAQ8plex)	1.54474	1		1.39356	1		1.16275	1		1.3456	1		1.76443	1		41.06	3	1941.1	-1.25282	0
gPFPII	14	9	1	R4R2H5	N-Term(iTRAQ8plex)	0.595811	7	6.40806	0.432568	7	23.1497	0.260487	7	61.7646	0.459675	7	27.4249	0.417958	7	47.2392	41.03	2	947.586	-0.765277	0
sGWTPAPAcIEIIcDPPR	1	2	1	D6PZY4	N-Term(iTRAQ8plex); C9(Carbamidomethyl); C14(Carbamidomethyl)	0.804221	1		0.844906	1		0.821829	1		0.683225	1		0.70324	1		40.98	3	2344.17	0.434775	0
gPSGSQQDLVk	3	3	2	W5Q6U0;Q06B57	N-Term(iTRAQ8plex); K11(iTRAQ8plex)																40.96	2	1723.98	-1.69665	0
vAIIDTYk	25	9	1	S9Y2X0	N-Term(iTRAQ8plex); K8(iTRAQ8plex)	0.905034	25	11.4375	0.98415	25	11.8566	1.20057	25	11.4712	1.07823	25	14.2888	1.37032	25	14.822	40.8	2	1530.93	-2.90649	0
yIDxEELNk	2	14	1	A0A088QFM6	N-Term(iTRAQ8plex); X4(Q); K9(iTRAQ8plex)	0.533726	1		0.945837	1		0.561804	1		0.379044	1		0.399686	1		40.69	2	1759.96	-2.6219	0
dQAMEDAk	1	2	1	D2DRB7	N-Term(iTRAQ8plex); K8(iTRAQ8plex)	1.14634	1		0.874862	1		1.84062	1		1.94315	1		2.36564	1		40.63	2	1515.78	-6.34147	0
nANEEEYSIR	8	5	1	E7BQS5	N-Term(iTRAQ8plex)	4.01135	8	7.21653	2.83163	8	10.9438	2.36103	8	25.5201	4.11598	8	26.565	2.327	8	13.0192	40.59	2	1528.75	-3.72488	0
aPQVSTPTLVEISR	2	4	1	P14639	N-Term(iTRAQ8plex)	1.60882	2	10.776	1.52121	2	2.93179	2.2108	2	7.88374	2.18219	2	0.894095	2.01005	2	1.9911	40.57	2	1802.03	-1.98833	0
dPPANIQLFQEVPk	6	2	1	W5PMT0	N-Term(iTRAQ8plex); K14(iTRAQ8plex)	0.845632	6	10.5752	0.744004	6	10.2973	0.851084	6	25.7843	0.837939	6	10.3286	0.891691	6	25.6771	40.46	3	2204.25	-2.38455	0
vAGTWHSLAmAASDISLLDAQSAPLR	1	3	1	P67975	N-Term(iTRAQ8plex); M10(Oxidation)	1.49446	1		1.29498	1		1.29077	1		1.22951	1		1.65288	1		40.44	3	3001.57	0.229776	0
aAASFFSAScVPcADQSSFPk	1	1	1	W5PF65	N-Term(iTRAQ8plex); C10(Carbamidomethyl); C13(Carbamidomethyl); K21(iTRAQ8plex)	0.710564	1		0.546371	1		0.680999	1		0.637234	1		0.635869	1		40.33	3	2843.39	-1.40985	0
nIFEVPFQAR	12	3	2	W5PNP1;G5CC03	N-Term(iTRAQ8plex)																40.32	3	1524.85	-0.354614	0
rVTGIITQGAR	2	14	3	W5PNP1;Q95114;G5CC03	N-Term(iTRAQ8plex)																40.27	3	1475.89	-2.99929	1
rPSGVPDR	5	3	1	A5PK49	N-Term(iTRAQ8plex)	0.349616	5	17.225	0.286504	5	38.311	0.336885	5	24.9039	0.393334	5	29.3388	0.395762	5	24.2986	40.18	3	1187.68	0.199181	0
eVPDGLLASSk	13	1	1	A6ZE99	N-Term(iTRAQ8plex); K11(iTRAQ8plex)	1.30281	13	57.4396	1.04131	13	30.6187	0.938975	13	26.2479	0.98814	13	31.1969	0.921216	13	23.721	40.06	3	1724	-1.53525	0
iGGIGTVPVGR	2	27	1	E1BED8	N-Term(iTRAQ8plex)	0.602766	2	4.93503	1.01618	2	11.714	0.529211	2	14.1741	0.345521	2	4.37034	0.41078	2	11.6247	40.05	3	1329.81	-0.906185	0
lLDEEEATDNDLR	1	4	1	F1RRD6	N-Term(iTRAQ8plex)	0.789969	1		0.681081	1		0.655169	1		0.650525	1		0.587621	1		40.01	2	1836.91	-0.410649	0
dNccILDER	3	6	1	W5Q5A6	N-Term(iTRAQ8plex); C3(Carbamidomethyl); C4(Carbamidomethyl)	2.97104	3	42.3521	1.70011	3	4.08127	1.394	3	15.6305	1.02841	3	0.859788	1.03057	3	40.9203	39.93	2	1498.69	-1.0832	0
dAGTIAGLNVMR	2	12	1	F5CV66	N-Term(iTRAQ8plex)	0.882356	2	37.7175	0.728808	2	2.09359	0.525388	2	6.6944	0.639021	2	28.2205	0.751148	2	21.7376	39.86	3	1521.83	-1.26142	0
aGSAEYVk	7	4	2	W5PNP1;G5CC03	N-Term(iTRAQ8plex); K8(iTRAQ8plex)																39.79	2	1432.82	-4.6021	0
gEAGEMELFASTQNPmk	2	2	1	W5PMT0	N-Term(iTRAQ8plex); M16(Oxidation); K17(iTRAQ8plex)	0.80228	2	5.73553	0.64723	2	5.36831	0.751393	2	2.48444	0.747438	2	10.1355	0.841879	2	13.1535	39.66	3	2464.22	-3.08639	0
dDTGAPITk	1	1	1	W5PCT4	N-Term(iTRAQ8plex); K9(iTRAQ8plex)	1.77117	1		1.05833	1		1.0901	1		1.54737	1		0.974595	1		39.65	2	1525.87	-1.12633	0
fLDDDLTD	1	2	1	O97719	N-Term(iTRAQ8plex)	1.77702	1		1.26253	1		1.80523	1		1.44767	1		1.15395	1		39.44	2	1257.61	-1.03537	0
aSSImDELFQDR	1	3	1	W5PZI1	N-Term(iTRAQ8plex); M5(Oxidation)	0.759842	1		1.91542	1		0.359544	1		0.39147	1		0.290143	1		39.39	2	1731.85	-3.43627	0
vDVQAGGcEGk	1	2	1	E1BH06	N-Term(iTRAQ8plex); C8(Carbamidomethyl); K11(iTRAQ8plex)	0.74745	1		1.04818	1		1.12147	1		1.05095	1		0.561722	1		39.34	2	1727.92	-2.39236	0
kYNVPQLEIVPk	200	8	3	D2DRB7;P04653;Q8MIH4	N-Term(iTRAQ8plex); K1(iTRAQ8plex); K12(iTRAQ8plex)																39.28	5	2340.43	-4.27734	1
gEEFPSMSESR	7	6	1	W5NPT7	N-Term(iTRAQ8plex)	1.29543	7	5.86212	1.12877	7	1.02035	1.47528	7	1.38041	1.91578	7	8.8174	1.92663	7	1.75701	39.23	2	1559.73	-2.03515	0
dNTVTPVSk	2	8	1	F1MVS9	N-Term(iTRAQ8plex); K9(iTRAQ8plex)	0.988964	2	6.59707	0.952829	2	10.9358	1.08867	2	3.86578	1.22145	2	14.5143	1.54662	2	13.8847	39.05	2	1568.91	-0.910285	0
gQEDASSDR	2	6	1	Q29411	N-Term(iTRAQ8plex)	0.382014	2	7.68714	1.12574	2	6.66185	0.21609	2	22.2809	0.266696	2	6.98879	0.381275	2	13.2842	38.98	2	1268.59	-5.92883	0
dcQELFEDGER	1	2	1	E3VL24	N-Term(iTRAQ8plex); C2(Carbamidomethyl)	0.664805	1		0.581149	1		0.667245	1		0.783182	1		0.874721	1		38.93	2	1701.77	2.2221	0
vGDPEELNGIVQALcGSR	1	1	1	W5Q6U0	N-Term(iTRAQ8plex); C15(Carbamidomethyl)	0.842574	1		0.776106	1		0.524476	1		0.666007	1		0.627118	1		38.87	3	2218.12	-11.309	0
vVEGEPSLk	13	1	1	W5P9V5	N-Term(iTRAQ8plex); K9(iTRAQ8plex)	0.696181	13	37.2217	0.659899	13	14.8372	0.757394	13	22.4578	1.13265	13	22.1067	0.960153	13	14.2255	38.76	2	1565.93	-1.29368	0
eTENSYVSLk	1	2	1	W5PD71	N-Term(iTRAQ8plex); K10(iTRAQ8plex)	0.322528	1		0.262852	1		0.275604	1		0.358238	1		0.208195	1		38.6	2	1777.97	-5.10184	0
vGLVAVDk	10	7	3	Q2UVX4;W5NRI1;S9XDK9	N-Term(iTRAQ8plex); K8(iTRAQ8plex)																38.51	2	1408.9	-0.460376	0
gSLIVSGk	2	3	2	W5Q6U0;Q06B57	N-Term(iTRAQ8plex); K8(iTRAQ8plex)																38.28	2	1368.87	-0.60836	0
iPEVQVYSR	8	5	1	A4ZVY6	N-Term(iTRAQ8plex)	0.988506	8	18.632	0.917157	8	14.9144	0.901717	8	9.18209	0.926562	8	19.7424	0.986998	8	18.2616	38.26	3	1394.79	0.326388	0
lTSTPDTSQk	2	2	1	W5P5I0	N-Term(iTRAQ8plex); K10(iTRAQ8plex)	0.812702	2	4.45638	0.867025	2	3.36628	0.692947	2	34.4602	0.573344	2	37.0916	0.450017	2	108.04	38.25	2	1685.95	0.680838	0
lSFMAIPPk	102	16	1	Q28417	N-Term(iTRAQ8plex); K9(iTRAQ8plex)	1.34569	102	30.8363	1.38949	102	48.945	1.66065	102	42.4129	2.78244	102	50.0779	2.61477	102	47.1475	38.21	3	1611.97	-4.71212	0
nmAIHPR	28	7	3	E7BQS5;P04654;E7BQS3	N-Term(iTRAQ8plex); M2(Oxidation)																38.19	3	1158.63	-0.635681	0
acEPGVDYVYk	1	7	1	Q2UVX4	N-Term(iTRAQ8plex); C2(Carbamidomethyl); K11(iTRAQ8plex)	0.706815	1		0.927282	1		0.895372	1		1.04675	1		1.04193	1		38.17	2	1909	-1.21105	0
eQEGEEMAEYR	17	2	1	W5NPT7	N-Term(iTRAQ8plex)	1.17002	17	10.8715	1.00174	17	13.0719	1.13567	17	11.6721	1.22565	17	14.9708	1.10665	17	12.8188	38.15	2	1674.75	-4.93429	0
yLLFcMENSAEPEQSLVcQcLVR	1	2	1	G5E5H7	N-Term(iTRAQ8plex); C5(Carbamidomethyl); C18(Carbamidomethyl); C20(Carbamidomethyl)	0.994866	1		1.07205	1		0.925153	1		1.32707	1		1.54809	1		38.12	3	3150.45	-15.4505	0
eSQAPALPAQEEIPVPLGG	2	1	1	W5NWM2	N-Term(iTRAQ8plex)	0.560917	2	92.4043	0.805646	2	19.9002	0.837057	2	36.2815	0.622556	2	77.4836	0.483435	2	144	38.04	2	2207.17	-5.3631	0
iTMPLW	7	5	2	D2DRB7;P04653	N-Term(iTRAQ8plex)																38	2	1064.61	-2.51452	0
eQEGEEmAEYR	2	2	1	W5NPT7	N-Term(iTRAQ8plex); M7(Oxidation)	1.09952	2	9.43468	0.913102	2	7.60596	1.13895	2	5.82289	1.25153	2	4.97307	1.14735	2	22.048	37.98	2	1690.75	-4.11823	0
iPLQPNFQADQFQGk	7	3	1	W5PMH6	N-Term(iTRAQ8plex); K15(iTRAQ8plex)	1.37172	7	24.7236	1.12246	7	16.6742	1.67752	7	36.5414	2.03671	7	47.9499	1.73584	7	40.159	37.95	3	2339.29	-3.36287	0
eVNVSPcPTQPck	2	3	1	W5NSH8	N-Term(iTRAQ8plex); C7(Carbamidomethyl); C12(Carbamidomethyl); K13(iTRAQ8plex)	1.0194	2	7.82862	0.82878	2	15.8452	1.05281	2	8.85539	1.01921	2	21.0394	0.971203	2	7.2682	37.91	3	2124.1	-1.3865	0
eLPDPQESIQR	3	4	1	W5PF65	N-Term(iTRAQ8plex)	1.33008	3	45.723	1.55969	3	6.81273	1.32383	3	10.4657	0.923895	3	23.5906	0.695891	3	24.2935	37.9	3	1615.86	-2.11105	0
mFAEEDAELMR	1	1	1	W5Q5W1	N-Term(iTRAQ8plex)	0.941554	1		0.813672	1		0.823129	1		0.814608	1		0.850122	1		37.9	2	1645.78	-3.04744	0
gYLTPNYEVk	5	4	1	W5PLB7	N-Term(iTRAQ8plex); K10(iTRAQ8plex)	0.48036	5	41.2879	0.411909	5	46.3523	0.341411	5	50.8147	0.346353	5	70.9826	0.345798	5	28.368	37.87	2	1792.02	2.76278	0
gSPAANVGVk	1	3	1	O46375	N-Term(iTRAQ8plex); K10(iTRAQ8plex)	0.45842	1		0.481213	1		0.416503	1		0.481242	1		0.466779	1		37.85	2	1507.9	-2.80703	0
tLLEAVAk	37	7	1	W5PMT0	N-Term(iTRAQ8plex); K8(iTRAQ8plex)	0.856262	37	14.2736	0.849993	37	17.0194	0.632249	37	13.7846	0.74584	37	14.3483	0.688355	37	17.7378	37.78	2	1452.92	0.165863	0
tVGPYGETFNk	2	4	2	W5NWM2;F1N3Q7	N-Term(iTRAQ8plex); K11(iTRAQ8plex)																37.75	3	1821	1.73576	0
tIDmESTEVFTk	11	8	3	E7BQS5;P04654;E7BQS3	N-Term(iTRAQ8plex); M4(Oxidation); K12(iTRAQ8plex)																37.75	2	2025.06	-2.11577	0
sLAQPLTVPWDPR	1	1	1	W5Q9A2	N-Term(iTRAQ8plex)	0.994414	1		0.666421	1		0.954394	1		0.604509	1		0.920996	1		37.74	2	1784	-0.666991	0
nLENTVk	6	5	1	A5JSS7	N-Term(iTRAQ8plex); K7(iTRAQ8plex)	1.0195	6	14.0717	0.912585	6	15.9215	1.48106	6	38.0185	2.25512	6	24.872	2.17498	6	21.1216	37.72	2	1425.84	-5.52334	0
dVFLGSFLYEYSR	7	3	1	P14639	N-Term(iTRAQ8plex)	0.971325	7	8.98562	1.07265	7	6.3396	1.67489	7	7.18031	1.3363	7	14.6826	1.49068	7	4.42886	37.58	2	1899.98	-0.269406	0
iHPVQER	16	24	1	W5PMT0	N-Term(iTRAQ8plex)	0.860793	8	4.12423	0.710977	8	16.9513	0.637118	8	16.109	0.644898	8	15.6965	0.59371	8	19.0721	37.57	3	1182.69	-0.258811	0
lSISETYDLk	5	7	1	I1WXR3	N-Term(iTRAQ8plex); K10(iTRAQ8plex)	0.858198	5	6.79145	0.984523	5	6.33118	1.18793	5	13.0326	1.13661	5	9.43666	1.03409	5	7.88944	37.56	3	1777.02	0.347723	0
qGFGNIATNAEGk	4	6	1	A6QPX7	N-Term(iTRAQ8plex); K13(iTRAQ8plex)	2.58053	4	52.9746	2.35981	4	44.6399	2.32028	4	49.6337	1.47596	4	25.3804	1.17287	4	16.9426	37.55	2	1915.04	-5.75112	0
cVPVVcDSSQESEVR	1	3	1	L8HQV0	N-Term(iTRAQ8plex); C1(Carbamidomethyl); C6(Carbamidomethyl)	0.910428	1		0.66067	1		0.52289	1		0.601428	1		0.615661	1		37.55	2	2054.98	-1.11398	0
rPQDTQYYSPFSSFPR	3	3	1	W5PZI1	N-Term(iTRAQ8plex)	1.24632	3	15.1247	1.63279	3	9.87337	0.823954	3	1.1732	0.798182	3	11.1443	0.823279	3	2.64973	37.54	3	2280.13	-2.41193	0
fGHMEVPSTVSR	9	7	1	Q9MZY2	N-Term(iTRAQ8plex)	1.63779	9	13.5156	1.25813	9	3.84714	1.58501	9	25.3316	1.40191	9	20.7652	1.35839	9	28.1114	37.51	3	1650.85	-2.95363	0
tAVQGLPER	16	1	1	W5PGE9	N-Term(iTRAQ8plex)	0.787032	16	50.13	0.7301	16	44.7132	0.663851	16	24.1277	0.650439	16	33.0059	0.738904	16	22.4049	37.5	2	1274.73	-3.67442	0
rPSGIPDR	5	1	1	L8HNW4	N-Term(iTRAQ8plex)	0.446094	5	42.1591	0.323122	5	11.732	0.287398	5	11.8522	0.337841	5	20.1968	0.455881	5	9.58928	37.4	3	1201.69	-3.63327	0
yIAPQEAVAAk	9	1	1	W5PZD0	N-Term(iTRAQ8plex); K11(iTRAQ8plex)	1.10382	9	19.1675	1.06136	9	9.01525	1.18576	9	8.70529	2.02759	9	12.68	2.24859	9	22.4871	37.28	3	1769.03	-4.75511	0
ySPTDcISPHk	2	3	1	E9NRZ3	N-Term(iTRAQ8plex); C6(Carbamidomethyl); K11(iTRAQ8plex)	1.04248	2	0.822577	0.850649	2	6.64476	1.08303	2	7.72523	1.04101	2	0.485455	1.11791	2	3.20702	37.26	3	1913	-4.55279	0
aGDGVYTFNNk	2	1	1	B6D985	N-Term(iTRAQ8plex); K11(iTRAQ8plex)	1.93783	2	47.7312	2.57739	2	52.1521	1.22664	2	10.4009	0.756072	2	21.3397	0.589793	2	31.4161	37.24	2	1793.96	-2.35945	0
yAmVYGYNAAYDR	1	2	1	W5QHS2	N-Term(iTRAQ8plex); M3(Oxidation)	0.64617	1		0.416842	1		0.209067	1		0.202413	1		0.179484	1		37.13	2	1876.88	-4.45756	0
mLDTSTLLk	16	2	1	W5PZI1	N-Term(iTRAQ8plex); K9(iTRAQ8plex)	1.03359	16	16.2328	3.49639	16	28.8864	1.00818	16	16.6662	0.987203	16	15.7596	0.811996	16	21.5974	37.08	2	1629.96	-5.81249	0
tITLEVEPSDTIENVk	4	23	1	Q865C5	N-Term(iTRAQ8plex); K16(iTRAQ8plex)	0.640027	4	8.81696	0.638703	4	5.05772	0.70882	4	7.83016	0.740148	4	17.437	0.833799	4	26.9055	37.08	3	2396.34	0.970613	0
gAVTGSVEk	5	13	2	A6ZE99;L8I632	N-Term(iTRAQ8plex); K9(iTRAQ8plex)																37.02	3	1455.86	-4.69941	0
gVGGAQAPEIDR	1	2	1	W5PQH0	N-Term(iTRAQ8plex)	0.635128	1		0.399343	1		0.319554	1		0.24457	1		0.421945	1		36.97	2	1473.79	-2.18679	0
aAAQEQYSAAMAR	2	1	1	W5NRG7	N-Term(iTRAQ8plex)	2.28229	2	20.7598	1.8566	2	15.5098	0.930024	2	19.9959	0.824299	2	14.2971	0.69796	2	1.03799	36.88	2	1671.84	0.685649	0
tVmENFVAFVDk	13	7	3	P14639;P02769;X2GM95	N-Term(iTRAQ8plex); M3(Oxidation); K12(iTRAQ8plex)																36.88	2	2024.1	-0.850297	0
iIALDGDTk	2	9	1	Q6PT94	N-Term(iTRAQ8plex); K9(iTRAQ8plex)	0.614075	2	0.6844	0.918797	2	1.34302	0.702365	2	9.88059	0.544009	2	20.4595	0.705442	2	2.67468	36.83	2	1553.94	1.053	0
fDDENFILk	1	28	1	Q864L8	N-Term(iTRAQ8plex); K9(iTRAQ8plex)	0.86659	1		1.20728	1		1.06339	1		1.25964	1		1.07363	1		36.8	2	1748.96	-3.13978	0
lMELGHk	26	5	1	A5JSS7	N-Term(iTRAQ8plex); K7(iTRAQ8plex)	1.04098	26	19.75	0.934642	26	19.6688	1.47343	26	19.9904	2.26629	26	20.957	2.35359	26	19.9662	36.76	4	1435.86	0.40554	0
dDQNPHSR	16	3	1	P00712	N-Term(iTRAQ8plex)	1.52143	16	44.8733	1.592	16	19.7794	1.89419	16	40.7496	2.39746	16	41.4914	1.79445	16	26.2765	36.74	3	1272.62	-1.07444	0
gYLDYDEVDDNR	2	1	1	P68117	N-Term(iTRAQ8plex)	1.00281	2	64.6567	2.02022	2	82.0836	1.78329	2	86.3385	1.53579	2	55.2156	1.06094	2	29.5023	36.7	2	1777.81	-5.95481	0
lSINTQNk	2	4	2	W5NRI1;Q2UVX4	N-Term(iTRAQ8plex); K8(iTRAQ8plex)																36.67	2	1525.91	-5.12136	0
dTETcYTYDR	1	1	1	W5PPQ8	N-Term(iTRAQ8plex); C5(Carbamidomethyl)	0.702188	1		0.670704	1		0.767535	1		0.990013	1		1.03467	1		36.65	2	1627.72	-0.923506	0
tVTNAEGHTETTk	2	1	1	W5Q5H8	N-Term(iTRAQ8plex); K13(iTRAQ8plex)	1.99113	2	2.64481	2.76361	2	0.0574559	2.6632	2	2.33917	1.85893	2	6.26238	1.34507	2	22.2364	36.6	3	1997.07	-5.38871	0
sPAQTxQWQVLPNAVPAk	8	1	1	D2SZC1	N-Term(iTRAQ8plex); X6(E); K18(iTRAQ8plex)	1.05333	8	5.23421	1.01126	8	8.77574	1.33459	8	6.47233	1.34264	8	2.42671	1.62006	8	7.78317	36.56	2	2572.47	12.1333	0
gPGGVWAAk	5	6	2	W5PJR5;W5PJG0	N-Term(iTRAQ8plex); K9(iTRAQ8plex)																36.55	2	1450.85	-6.20738	0
scPEAIDEIFR	1	3	1	W5PFL8	N-Term(iTRAQ8plex); C2(Carbamidomethyl)	1.20126	1		1.04443	1		0.846234	1		1.48009	1		1.20479	1		36.36	2	1640.82	-2.37834	0
yLGPEYLQAIANVR	2	3	1	W5PFC9	N-Term(iTRAQ8plex)	1.08415	2	27.1551	0.943708	2	45.1798	1.01909	2	12.7226	0.938032	2	9.22145	0.949837	2	2.58339	36.35	2	1911.05	-5.0068	0
lcSQYAAYGk	2	8	1	W5PTG9	N-Term(iTRAQ8plex); C2(Carbamidomethyl); K10(iTRAQ8plex)	0.605791	1		1.30136	1		1.46951	1		1.80013	1		0.56811	1		36.34	2	1768.94	-4.82817	0
mcLDYPVTk	1	4	1	L8IG34	N-Term(iTRAQ8plex); C2(Carbamidomethyl); K9(iTRAQ8plex)	0.765834	1		1.12453	1		1.38321	1		1.7957	1		1.51337	1		36.3	2	1734.94	2.33254	0
dIcxIScDk	4	4	1	Q69B57	N-Term(iTRAQ8plex); C3(Carbamidomethyl); X4(N); C7(Carbamidomethyl); K9(iTRAQ8plex)	1.50789	4	13.147	1.2099	4	21.6839	1.85351	4	35.5172	2.42326	4	26.4914	1.96205	4	7.2011	36.28	2	1732.87	-6.03265	0
dFGHIQYVAAYR	3	13	3	W5PNP1;Q95114;G5CC03	N-Term(iTRAQ8plex)																36.22	3	1743.91	-0.419898	0
rSPALGAANR	3	7	1	Q9MZY2	N-Term(iTRAQ8plex)	1.54493	3	17.8439	1.73677	3	23.9355	1.90404	3	18.3013	1.33609	3	24.3279	2.02463	3	26.4033	36.21	3	1316.77	0.774608	1
vPDVLVADPPTAGLSVSGR	1	5	1	W5Q302	N-Term(iTRAQ8plex)	0.969357	1		0.610409	1		0.840454	1		0.935916	1		1.17052	1		36.2	3	2154.2	-5.11055	0
vAAAITk	4	23	1	C6ZP46	N-Term(iTRAQ8plex); K7(iTRAQ8plex)	1.30199	2	6.55841	0.201847	2	47.29	0.123337	2	81.626	0.292491	2	3.77819	0.380223	2	0.850187	36.08	3	1281.84	1.0435	0
eDQTEYLEER	1	16	1	A0A088QFM6	N-Term(iTRAQ8plex)	0.585371	1		1.05656	1		0.786932	1		0.479362	1		0.64001	1		36.04	2	1615.77	-1.51417	0
dIcEAQVNSLGPSITk	2	4	2	W5NPK5;O46544	N-Term(iTRAQ8plex); C3(Carbamidomethyl); K16(iTRAQ8plex)																35.95	3	2340.26	-4.15545	0
sQPTcLPVcGQPSR	4	7	1	F1MVS9	N-Term(iTRAQ8plex); C5(Carbamidomethyl); C9(Carbamidomethyl)	1.1672	4	29.3269	1.10552	4	23.5885	1.10078	4	4.6897	1.0696	4	14.8735	1.35944	4	19.4902	35.79	2	1890.94	-1.66488	0
sLSVIPGETASIScR	2	1	1	W5QI15	N-Term(iTRAQ8plex); C14(Carbamidomethyl)	0.522031	2	115.313	0.301471	2	105.3	0.275652	2	68.188	0.315693	2	32.8733	0.214796	2	81.4736	35.79	2	1881	-0.880164	0
tSTADYASFk	3	5	1	W5Q5A6	N-Term(iTRAQ8plex); K10(iTRAQ8plex)	1.82716	3	17.2078	3.08123	3	31.202	2.86794	3	42.9955	1.78479	3	2.45556	1.5097	3	18.6651	35.74	2	1698.91	-0.898845	0
vATVSLPR	38	3	1	P00761	N-Term(iTRAQ8plex)	1.43843	38	17.9947	1.44351	38	15.7275	2.06224	38	28.8713	2.64224	38	33.0561	2.45603	38	26.9237	35.72	3	1146.71	-0.0924254	0
iQPVAWHNR	8	9	3	W5PNP1;Q95114;G5CC03	N-Term(iTRAQ8plex)																35.72	3	1424.81	-0.0717403	0
sLcEMAEk	6	19	2	A6ZE99;L8I632	N-Term(iTRAQ8plex); C3(Carbamidomethyl); K8(iTRAQ8plex)																35.68	2	1575.82	-5.14431	0
tNAIPYVR	83	8	3	E7BQS5;P04654;E7BQS3	N-Term(iTRAQ8plex)																35.47	3	1237.72	-1.86223	0
nIEDALNQLFR	1	4	1	W5PU70	N-Term(iTRAQ8plex)	1.4815	1		2.22461	1		2.12323	1		2.08254	1		2.35079	1		35.42	2	1636.9	3.2705	0
sYELPDGQVITIGNER	1	52	1	A1E0X2	N-Term(iTRAQ8plex)	0.434775	1		0.764679	1		0.479265	1		0.363525	1		0.454218	1		35.42	2	2095.09	-5.65823	0
sVASIGGNIITASPISDLNPVFMASGTk	4	9	2	W5PMT0;S9Y4T1	N-Term(iTRAQ8plex); K28(iTRAQ8plex)																35.28	3	3355.85	1.79947	0
dGAPcVFGGTVYR	1	5	1	W5PXV3	N-Term(iTRAQ8plex); C5(Carbamidomethyl)	0.161119	1		0.0600564	1		0.0563712	1		0.0725417	1		0.0569977	1		35.25	2	1702.86	1.77998	0
sPAQTLQWQVLPNTAPAk	23	10	1	P50420	N-Term(iTRAQ8plex); K18(iTRAQ8plex)	1.02118	23	23.4934	1.05624	23	19.6945	1.36465	23	43.4768	1.40847	23	28.096	1.42894	23	36.1654	35.23	3	2558.47	7.6226	0
sPAQTLQWxVLPNTVPAk	23	2	1	A0SWQ7	N-Term(iTRAQ8plex); X9(V); K18(iTRAQ8plex)	1.13319	22	29.3988	1.13032	22	25.112	1.5324	22	39.1887	1.59921	22	39.4789	1.98953	22	50.6611	35.22	3	2557.46	-13.8781	0
tVLGELGINR	2	5	1	I1WXR3	N-Term(iTRAQ8plex)	0.909343	2	2.78145	0.844746	2	4.59314	1.07547	2	8.87073	0.733933	2	0.182726	0.554449	2	2.50703	35.15	3	1375.82	0.360928	0
lELNVDSSk	1	2	1	E1BH06	N-Term(iTRAQ8plex); K9(iTRAQ8plex)	0.886165	1		1.28453	1		1.34766	1		1.3793	1		0.966676	1		35.13	3	1612.94	3.43566	0
eIPLSPmGEDSASGDIETLHSk	2	11	1	Q2TJL6	N-Term(iTRAQ8plex); M7(Oxidation); K22(iTRAQ8plex)	0.825578	2	9.19419	0.637767	2	19.5353	0.681666	2	24.1791	0.69619	2	7.42085	0.685906	2	18.1363	35.11	3	2937.5	0.329123	0
yVEcSALTQk	2	8	1	L8I2G1	N-Term(iTRAQ8plex); C4(Carbamidomethyl); K10(iTRAQ8plex)	0.601761	2	20.2683	0.562001	2	2.82201	0.585508	2	7.72673	0.520266	2	7.49481	0.576945	2	1.70793	35.03	3	1806.98	-2.22658	0
vYVEELkPTPEGDLEILLQk	27	10	1	G5E5H7	N-Term(iTRAQ8plex); K7(iTRAQ8plex); K20(iTRAQ8plex)	0.921217	27	34.1409	0.913352	27	17.5042	1.24019	27	29.7416	1.75308	27	24.2295	1.80296	27	26.6411	34.99	3	3225.89	6.20025	0
dTFADASQR	2	2	1	W5PJZ2	N-Term(iTRAQ8plex)	0.846074	2	3.03842	0.991417	2	24.853	1.80728	2	37.2127	1.55751	2	33.6071	1.24205	2	35.5022	34.77	2	1314.66	-1.35021	0
qGLMPVLESLk	5	3	1	W5NX51	N-Term(iTRAQ8plex); K11(iTRAQ8plex)	1.08315	5	11.8498	1.09002	5	3.0916	1.30336	5	16.9002	1.04561	5	2.40213	1.03313	5	4.47783	34.7	3	1823.09	-3.09989	0
ncELFEk	13	3	1	P14639	N-Term(iTRAQ8plex); C2(Carbamidomethyl); K7(iTRAQ8plex)	1.0546	13	6.53051	1.32194	13	26.3183	1.97532	13	22.6842	1.38836	13	22.0142	1.37891	13	20.3283	34.68	2	1547.83	-4.83723	0
nHLNFLk	38	1	1	E7BQS5	N-Term(iTRAQ8plex); K7(iTRAQ8plex)	2.58449	38	37.5429	3.07891	38	36.2142	2.44945	38	41.9505	8.1471	38	43.638	3.59524	38	42.1993	34.66	3	1493.9	-2.76548	0
tPWIQVNLLR	3	2	1	W5PNP1	N-Term(iTRAQ8plex)	1.02971	3	3.19891	0.871637	3	15.56	0.936379	3	4.58366	1.07968	3	1.89253	1.00351	3	8.41166	34.6	3	1543.92	-0.822831	0
sIVTLDGGk	7	11	1	C0LSL0	N-Term(iTRAQ8plex); K9(iTRAQ8plex)	1.01312	7	10.6404	1.90657	7	28.8516	1.44403	7	27.4886	1.38128	7	12.8256	1.57069	7	15.7288	34.59	3	1497.91	-1.31705	0
sLcEmAEk	2	19	2	A6ZE99;L8I632	N-Term(iTRAQ8plex); C3(Carbamidomethyl); M5(Oxidation); K8(iTRAQ8plex)																34.59	2	1591.83	2.31955	0
sPAQTLQWxVLPNTVPAk	23	2	1	A0SWQ7	N-Term(iTRAQ8plex); X9(T); K18(iTRAQ8plex)	1.12509	23	14.6053	1.02626	23	17.0624	1.41869	23	42.4364	1.5248	23	34.7914	1.53261	23	25.3198	34.57	3	2559.47	-0.589232	0
qDENYEEAIVHLk	1	9	1	W5NPT7	N-Term(iTRAQ8plex); K13(iTRAQ8plex)	1.29855	1		1.10441	1		1.44899	1		1.77844	1		1.78776	1		34.52	3	2196.19	6.94421	0
vNHVTLTQPk	11	4	1	A4ZVY6	N-Term(iTRAQ8plex); K10(iTRAQ8plex)	0.986373	11	12.4183	0.943792	11	19.6948	1.11679	11	14.4796	1.29647	11	14.6254	1.31334	11	16.8167	34.45	2	1745.05	-2.63824	0
lDQWLcEk	76	14	1	P00712	N-Term(iTRAQ8plex); C6(Carbamidomethyl); K8(iTRAQ8plex)	1.58916	76	22.4027	1.35108	76	32.1722	1.69291	76	28.6566	2.32793	76	37.6282	1.4713	76	25.5225	34.42	2	1699.93	-2.17792	0
vPSxAVVAR	8	18	2	W5PFC9;W5PF65	N-Term(iTRAQ8plex); X4(H)																34.34	3	1239.75	-1.79664	0
lSPLAQELR	2	5	1	W5NX51	N-Term(iTRAQ8plex)	1.16905	2	5.31126	1.07801	2	13.2463	1.29212	2	3.76776	0.738063	2	12.8356	0.872294	2	0.326607	34.26	3	1330.79	-3.65073	0
dScMGTLVVk	4	5	2	W5NRI1;Q2UVX4	N-Term(iTRAQ8plex); C3(Carbamidomethyl); K10(iTRAQ8plex)																34.24	2	1717.94	-1.74853	0
gAcLLPk	9	7	2	P14639;P02769	N-Term(iTRAQ8plex); C3(Carbamidomethyl); K7(iTRAQ8plex)																34.2	3	1366.83	-0.738603	0
iESQENSk	3	4	1	Q9XSY9	N-Term(iTRAQ8plex); K8(iTRAQ8plex)	2.36709	3	29.6234	2.40746	3	30.6698	2.74629	3	9.58929	5.31294	3	52.4733	3.95881	3	22.2254	34.1	2	1542.85	-4.93612	0
aVFPSIVGRPR	1	30	1	A1E0X2	N-Term(iTRAQ8plex)	0.392697	1		0.501186	1		0.252619	1		0.152341	1		0.186769	1		34.09	3	1502.91	0.278639	0
iNLFDSPLETQYVR	2	2	1	G5CC03	N-Term(iTRAQ8plex)	0.918873	2	13.0319	0.517972	2	22.0146	0.499193	2	13.8766	0.583788	2	14.5713	0.562776	2	29.206	33.88	3	1999.1	10.5654	0
dVTIADcGk	3	6	1	Q5TIK9	N-Term(iTRAQ8plex); C7(Carbamidomethyl); K9(iTRAQ8plex)	1.00459	3	17.095	0.741994	3	5.60151	0.833714	3	2.69612	1.10354	3	5.2613	0.978999	3	23.3275	33.83	3	1586.87	-1.14749	0
iFTDAADLSGVTGTR	2	2	1	W5Q0X5	N-Term(iTRAQ8plex)	1.56152	2	40.6952	1.49135	2	12.8189	1.48539	2	8.06582	1.20319	2	26.7742	1.26623	2	38.1579	33.79	2	1827.98	1.43527	0
eGGQTAPASTR	1	8	1	T0MIA6	N-Term(iTRAQ8plex)	1.93688	1		0.590051	1		0.976362	1		0.832689	1		0.960578	1		33.74	2	1378.72	-0.719466	0
nADEEEYSIR	2	1	1	P04654	N-Term(iTRAQ8plex)	3.4038	2	1.94873	2.03825	2	7.73181	1.98405	2	10.7202	2.97211	2	13.2675	1.73625	2	12.8418	33.72	2	1529.73	-2.77223	0
iSQYYQk	133	8	3	E7BQS5;P04654;E7BQS3	N-Term(iTRAQ8plex); K7(iTRAQ8plex)																33.72	2	1537.88	-3.78458	0
aAVAADAk	3	3	1	W5PWM0	N-Term(iTRAQ8plex); K8(iTRAQ8plex)	0.721164	3	15.4519	0.612541	3	27.336	0.548503	3	29.847	0.626014	3	6.4351	0.572082	3	74.276	33.7	2	1324.81	0.545046	0
fPLGPVTSTTR	1	2	1	Q2KJF1	N-Term(iTRAQ8plex)	0.91828	1		1.17552	1		1.3178	1		0.868209	1		0.890045	1		33.65	3	1479.84	-1.6823	0
dIMLATGk	3	3	2	W5Q6U0;Q06B57	N-Term(iTRAQ8plex); K8(iTRAQ8plex)																33.64	3	1456.86	-0.524168	0
aAGAAPEGTGLcVcAQR	1	1	1	A5PKD8	N-Term(iTRAQ8plex); C12(Carbamidomethyl); C14(Carbamidomethyl)	0.813562	1		0.523084	1		0.711153	1		0.807946	1		0.907237	1		33.58	2	1992.98	-2.73899	0
sQYEQLAEQNR	1	2	1	S9WUY9	N-Term(iTRAQ8plex)	1.82944	1		1.14215	1		1.68272	1		1.66254	1		2.96671	1		33.57	2	1669.84	-0.924669	0
vAATVELIVQR	1	2	1	Q06B57	N-Term(iTRAQ8plex)	0.695241	1		1.48354	1		0.843501	1		0.768151	1		0.750251	1		33.53	2	1502.92	-2.11	0
rPSGIPAR	6	4	1	W5PSP9	N-Term(iTRAQ8plex)	0.61545	6	35.9001	0.336072	6	75.6147	0.418284	6	33.0977	0.357299	6	56.9124	0.64356	6	15.7372	33.52	3	1157.71	-0.192907	0
fQSEEQQQmEDELQDk	7	1	1	Q9TSI0	N-Term(iTRAQ8plex); M9(Oxidation); K16(iTRAQ8plex)	1.28348	7	21.2706	3.40942	7	131.433	1.50804	7	27.9975	1.72783	7	40.2599	1.58142	7	52.5821	33.51	3	2636.25	-5.3759	0
aTLGATEVk	1	3	1	F1S715	N-Term(iTRAQ8plex); K9(iTRAQ8plex)	0.719571	1		0.60673	1		0.607578	1		0.721487	1		1.06751	1		33.45	2	1497.91	-2.59161	0
vELLYNPAFcSLATAk	2	9	3	Q2UVX4;S9XDK9;W5NPK5	N-Term(iTRAQ8plex); C10(Carbamidomethyl); K16(iTRAQ8plex)																33.38	3	2405.34	3.08962	0
gFcGLSQPk	3	7	1	Q9MZY2	N-Term(iTRAQ8plex); C3(Carbamidomethyl); K9(iTRAQ8plex)	1.24681	3	26.7549	1.41173	3	32.4847	2.38941	3	34.4539	1.69005	3	17.0841	1.81159	3	3.55621	33.36	2	1601.88	-6.86049	0
lcVLHEk	33	12	3	P14639;P02769;X2GM95	N-Term(iTRAQ8plex); C2(Carbamidomethyl); K7(iTRAQ8plex)																33.33	3	1506.89	-0.613688	0
vQELQDk	2	7	1	W5NX51	N-Term(iTRAQ8plex); K7(iTRAQ8plex)	1.37936	2	34.6334	1.1543	2	22.6235	1.40308	2	27.3295	1.04308	2	24.7973	1.1271	2	43.0814	33.29	2	1467.86	-0.34137	0
sLGLTDDHIIFPVPIDR	5	1	1	W5PMH6	N-Term(iTRAQ8plex)	1.23553	5	16.3504	1.05786	5	19.9664	0.97137	5	30.2332	1.14572	5	14.5846	1.26936	5	35.7842	33.27	3	2212.22	-2.3686	0
lEGFSVPR	5	8	1	W5PMT0	N-Term(iTRAQ8plex)	0.97378	5	35.6072	0.968398	5	27.4156	0.646086	5	41.1882	0.85549	5	9.57689	0.567354	5	41.4858	33.26	3	1208.69	-1.747	0
lVVLGSGGVGk	1	5	1	I3LF84	N-Term(iTRAQ8plex); K11(iTRAQ8plex)	1.00916	1		0.979045	1		0.943058	1		0.892072	1		0.937704	1		33.24	3	1594.01	-1.09511	0
lcGAILGGPk	2	3	1	S5FR89	N-Term(iTRAQ8plex); C2(Carbamidomethyl); K10(iTRAQ8plex)	1.04149	2	70.8665	1.53418	2	28.0138	0.971248	2	10.3101	1.13777	2	29.2098	1.06071	2	21.3354	33.13	3	1593.97	2.89206	0
gSELVVAGk	2	9	1	W5NRG7	N-Term(iTRAQ8plex); K9(iTRAQ8plex)	1.65018	1		1.59057	1		1.43578	1		1.20998	1		1.21726	1		33.07	2	1467.9	-0.273902	0
eDTVGRPLPHLAAAMQASGEAVYcDDIPR	1	7	1	W5PMT0	N-Term(iTRAQ8plex); C24(Carbamidomethyl)	0.69548	1		0.92805	1		0.93437	1		0.87651	1		1.29242	1		33.07	4	3443.7	0.369599	0
iTPSYVAFTPEGER	1	10	1	F5CV66	N-Term(iTRAQ8plex)	0.91085	1		0.80333	1		0.584506	1		0.564252	1		0.603483	1		33.04	2	1870.99	-0.0621487	0
qQLAPYSDDLR	4	5	1	W5NX51	N-Term(iTRAQ8plex)	1.22073	4	2.90676	1.2362	4	18.2934	1.42101	4	24.3105	0.842517	4	24.7072	1.01186	4	29.541	33.03	2	1609.85	-1.49097	0
lSPDAIPGNWASR	2	3	2	W5Q6U0;Q06B57	N-Term(iTRAQ8plex)																32.94	3	1687.91	-0.624062	0
tYDSYLGDDYVR	1	5	1	W5PF65	N-Term(iTRAQ8plex)	1.23814	1		1.43395	1		1.6923	1		1.09504	1		0.790864	1		32.93	2	1770.85	0.000667229	0
nFDDYMk	2	10	1	C0LSL0	N-Term(iTRAQ8plex); K7(iTRAQ8plex)	1.54269	2	4.63341	2.59637	2	17.2486	2.97416	2	26.8903	2.95321	2	5.77805	3.28253	2	15.8435	32.92	2	1540.79	-4.88032	0
gLQAVLk	10	3	1	Q9MZY2	N-Term(iTRAQ8plex); K7(iTRAQ8plex)	1.82891	10	8.37134	2.02691	10	13.4243	3.59938	10	19.1024	2.32058	10	16.0986	2.46086	10	19.2677	32.91	3	1336.88	-0.204972	0
sPAQTLQWQVLPNxVPAk	1	3	1	D2SZE3	N-Term(iTRAQ8plex); X14(C); X14(Carbamidomethyl); K18(iTRAQ8plex)	1.43883	1		1.05074	1		1.23242	1		1.56375	1		1.78685	1		32.9	2	2645.5	9.73333	0
eGREQEGEEMAEYR	3	2	1	W5NPT7	N-Term(iTRAQ8plex)	0.846829	3	12.1988	1.06445	3	10.9	0.604849	3	39.2586	0.490026	3	59.3751	0.52629	3	59.5184	32.89	2	2016.92	-2.77999	1
vDYGFQVk	1	4	2	W5NUX8;E1BH06	N-Term(iTRAQ8plex); K8(iTRAQ8plex)																32.85	2	1563.89	-4.77152	0
dDSPDLPk	4	6	2	P14639;P02769	N-Term(iTRAQ8plex); K8(iTRAQ8plex)																32.74	2	1494.81	-8.93198	0
lSSPAVITDEVIPAcLPSPNYVVADk	2	2	1	W5P3R3	N-Term(iTRAQ8plex); C15(Carbamidomethyl); K26(iTRAQ8plex)	0.801565	2	38.1532	0.966134	2	79.0703	0.980861	2	19.9088	0.919446	2	19.7506	0.985503	2	25.5012	32.72	3	3363.82	-2.94011	0
gWEEGVAQMSVGQR	1	6	1	P18203	N-Term(iTRAQ8plex)	2.08743	1		1.81819	1		0.91231	1		0.651111	1		0.668579	1		32.68	3	1837.91	-1.79167	0
aDQFANEWGR	5	16	2	W5PJR5;P42819	N-Term(iTRAQ8plex)																32.61	2	1497.73	-3.10659	0
lNNELLAk	4	5	1	I1WXR3	N-Term(iTRAQ8plex); K8(iTRAQ8plex)	1.06536	4	8.89858	1.43032	4	5.17012	1.52765	4	23.7077	1.4894	4	18.008	1.39377	4	15.224	32.52	2	1522.94	-3.43977	0
vDPEIQNVk	1	2	1	E1B991	N-Term(iTRAQ8plex); K9(iTRAQ8plex)	2.31994	1		1.79454	1		1.84541	1		2.60946	1		3.76066	1		32.5	2	1649.96	-2.19647	0
gDVAFVk	2	14	2	W5PFC9;W5PF65	N-Term(iTRAQ8plex); K7(iTRAQ8plex)																32.49	2	1343.81	-0.509794	0
aYLEEEcPGTLQR	1	1	1	W5Q9A2	N-Term(iTRAQ8plex); C7(Carbamidomethyl)	1.21637	1		0.840282	1		0.745401	1		0.684455	1		0.673658	1		32.49	2	1869.93	-1.59081	0
qcTNEFSVQNR	2	1	1	W5PZD0	N-Term(iTRAQ8plex); C2(Carbamidomethyl)	1.28712	2	16.4227	1.3472	2	6.81121	1.26892	2	11.3445	2.75822	2	3.55014	2.81494	2	14.4607	32.32	2	1686.81	-2.72567	0
lESDVSTQmEYcR	2	6	1	A6QPX7	N-Term(iTRAQ8plex); M9(Oxidation); C12(Carbamidomethyl)	1.74573	2	4.89422	2.25902	2	25.2712	2.04283	2	9.69897	1.16965	2	1.72579	1.02132	2	7.92198	32.23	2	1937.89	-0.856505	0
fWWENPGVFTEk	2	8	1	Q9MZY2	N-Term(iTRAQ8plex); K12(iTRAQ8plex)	1.32669	2	24.7821	1.47639	2	4.48315	2.67423	2	19.1127	1.65001	2	10.7297	1.66695	2	16.2441	32.22	3	2148.14	-0.680041	0
mGGGFGGk	8	9	2	W5PMT0;S9Y4T1	N-Term(iTRAQ8plex); K8(iTRAQ8plex)																32.2	3	1318.74	-0.177955	0
yPVEPFTER	1	1	1	Q155X5	N-Term(iTRAQ8plex)	1.30997	1		0.949765	1		1.03231	1		1.5414	1		1.76842	1		32.2	3	1441.76	-5.19925	0
lPLSILk	160	6	1	A5JSS7	N-Term(iTRAQ8plex); K7(iTRAQ8plex)	1.01237	80	11.973	1.05822	80	13.8324	1.65952	80	13.5043	2.71415	80	10.9552	2.83477	80	11.7318	32.14	2	1391.94	-3.23306	0
aALTIDEk	4	7	1	I1WXR3	N-Term(iTRAQ8plex); K8(iTRAQ8plex)	0.944317	4	8.10827	0.897746	4	30.909	1.09465	4	25.7113	1.03189	4	26.2489	0.957662	4	17.3926	32.1	2	1468.88	-1.85353	0
amAAEAEASR	1	7	1	T0MKA5	N-Term(iTRAQ8plex); M2(Oxidation)	0.604106	1		0.667997	1		0.684135	1		0.553533	1		0.599649	1		31.99	2	1326.66	-1.87276	0
qLEQVIAINLLPSR	1	4	1	W5Q5H8	N-Term(iTRAQ8plex)	0.61325	1		0.744832	1		0.733124	1		0.503578	1		0.548384	1		31.99	2	1898.14	-0.299631	0
ecVADESHAGcEk	2	1	1	X2GM95	N-Term(iTRAQ8plex); C2(Carbamidomethyl); C11(Carbamidomethyl); K13(iTRAQ8plex)	1.00284	2	9.97971	1.09692	2	12.9338	7.64182	2	18.274	1.37821	2	25.3635	0.995899	2	42.5664	31.98	2	2099.98	-8.94373	0
sAEcPGPAQk	2	3	1	L8HN27	N-Term(iTRAQ8plex); C4(Carbamidomethyl); K10(iTRAQ8plex)	0.619234	2	41.3732	0.631687	2	29.8514	1.02782	2	34.8978	1.098	2	42.5687	1.00165	2	40.6594	31.91	2	1652.89	-0.10283	0
sSLLDILAAR	2	10	1	Q4GZT4	N-Term(iTRAQ8plex)	1.32557	2	0.292431	1.14502	2	0.679079	0.955732	2	12.2449	0.990126	2	17.4327	1.21383	2	9.88567	31.87	2	1362.82	-3.13357	0
acGLNFADLMAR	1	2	1	I3L9V2	N-Term(iTRAQ8plex); C2(Carbamidomethyl)	0.881902	1		1.18378	1		0.907144	1		1.0597	1		1.3348	1		31.85	2	1642.83	-1.32586	0
eGMLSQGGVk	1	1	1	W5QH04	N-Term(iTRAQ8plex); K10(iTRAQ8plex)	0.980831	1		0.669974	1		0.48379	1		0.419699	1		0.421898	1		31.77	2	1613.91	-1.75897	0
eEGSVSSGTk	1	4	1	W5Q5H8	N-Term(iTRAQ8plex); K10(iTRAQ8plex)	1.67431	1		2.35801	1		2.35305	1		1.3309	1		1.18497	1		31.76	2	1588.86	-4.56071	0
lDPTYTSATLLFQk	8	6	1	W5PMT0	N-Term(iTRAQ8plex); K14(iTRAQ8plex)	0.885815	8	13.2673	0.938869	8	15.3412	0.946812	8	12.4824	1.04716	8	27.3356	0.92324	8	9.07758	31.68	3	2206.25	-2.93362	0
tLSDYNIQk	2	24	1	Q865C5	N-Term(iTRAQ8plex); K9(iTRAQ8plex)	0.685838	2	13.7472	0.582562	2	15.9635	0.534303	2	5.84548	0.582205	2	5.50525	0.497018	2	8.91073	31.62	2	1689.97	1.45711	0
vIAAEGEMNASR	1	6	1	T0MKA5	N-Term(iTRAQ8plex)	0.635069	1		0.615009	1		0.487567	1		0.612542	1		0.433	1		31.6	2	1551.81	-0.519045	0
hQQTITIPAR	6	7	2	W5NPK5;Q2UVX4	N-Term(iTRAQ8plex)																31.58	3	1468.85	-0.967904	0
sLPTALVk	15	1	1	W5QHZ5	N-Term(iTRAQ8plex); K8(iTRAQ8plex)	0.207953	15	21.204	0.160702	15	37.1568	0.166311	15	25.6383	0.226764	15	17.1818	0.170668	15	49.6913	31.55	2	1436.93	0.79505	0
hLVDEPQNLIk	22	9	3	P14639;P02769;X2GM95	N-Term(iTRAQ8plex); K11(iTRAQ8plex)																31.51	3	1914.11	-7.86304	0
sEVQAVmGQTTDELR	2	1	1	P0DML7	N-Term(iTRAQ8plex); M7(Oxidation)	0.673965	2	43.3732	0.381858	2	44.5691	0.292663	2	83.2594	0.391809	2	86.0468	0.3442	2	93.2298	31.42	3	1984.01	7.0799	0
tQLLNVcMNAR	1	1	1	W5P256	N-Term(iTRAQ8plex); C7(Carbamidomethyl)	0.746983	1		0.510275	1		0.395328	1		0.255243	1		0.253289	1		31.32	2	1623.86	-2.26852	0
lIVTQTmk	172	2	1	P67975	N-Term(iTRAQ8plex); M7(Oxidation); K8(iTRAQ8plex)	1.00913	86	21.8568	0.953198	86	28.3386	1.13752	86	19.5773	1.58654	86	21.7098	1.679	86	17.9785	31.26	2	1557.94	-3.17129	0
gPGPDSLMATLYSR	1	1	1	Q9XSM0	N-Term(iTRAQ8plex)	1.13967	1		0.759185	1		0.425293	1		0.356531	1		0.43935	1		31.25	2	1768.91	-4.1357	0
sFMAIPPk	7	2	1	A0N0S6	N-Term(iTRAQ8plex); K8(iTRAQ8plex)	0.549243	7	14.6543	0.628943	7	20.4982	0.711611	7	24.0103	0.804884	7	34.3859	0.957382	7	28.6122	31.2	3	1498.89	-2.46547	0
mWVTGVVTQGASR	2	9	3	W5PNP1;Q95114;G5CC03	N-Term(iTRAQ8plex); M1(Oxidation)																31.19	2	1711.91	-2.72156	0
eVTQVVk	1	4	1	A5D7H9	N-Term(iTRAQ8plex); K7(iTRAQ8plex)	0.759774	1		0.855709	1		0.719306	1		1.03041	1		1.05565	1		31.03	2	1410.87	-7.20979	0
lSFVTVDSNLR	1	10	1	W5NSA6	N-Term(iTRAQ8plex)	1.56477	1		1.39458	1		1.09107	1		0.715236	1		0.610467	1		31.03	2	1554.87	-4.72416	0
eQILAALEk	7	5	1	A1L555	N-Term(iTRAQ8plex); K9(iTRAQ8plex)	1.03637	7	29.108	0.833263	7	20.0545	1.05636	7	12.5671	1.08694	7	6.25574	1.27371	7	11.2101	30.92	3	1622.99	-2.15206	0
dVIGcLNVk	2	7	1	G3N3U3	N-Term(iTRAQ8plex); C5(Carbamidomethyl); K9(iTRAQ8plex)	1.14042	2	91.4072	0.636717	2	52.6649	0.674423	2	26.0368	0.796827	2	37.7963	0.644341	2	2.45494	30.91	2	1625.95	0.433084	0
qEILAALEk	4	4	0		N-Term(iTRAQ8plex); K9(iTRAQ8plex)																30.83	3	1622.99	-2.15206	0
gVVDSEDLPLNISR	2	23	1	A0A088QFM6	N-Term(iTRAQ8plex)	0.697779	1		0.642951	1		0.429443	1		0.241247	1		0.276596	1		30.82	2	1817.99	-1.99503	0
eYQTIADk	5	6	1	A2AXH8	N-Term(iTRAQ8plex); K8(iTRAQ8plex)	1.74058	5	15.4592	2.23788	5	7.20618	1.92782	5	10.4161	0.86232	5	4.51986	0.851363	5	3.1196	30.79	2	1575.87	-6.74848	0
sQVDTQAQQLR	2	1	1	W5NWM2	N-Term(iTRAQ8plex)	1.40843	2	32.1555	1.40124	2	83.3347	1.16662	2	0.166313	0.953597	2	24.2276	0.917385	2	32.4281	30.74	3	1577.85	-1.71391	0
fQSEEQQQMEDELQDk	1	1	1	Q9TSI0	N-Term(iTRAQ8plex); K16(iTRAQ8plex)	1.56262	1		1.03121	1		0.765906	1		1.12242	1		0.905554	1		30.72	3	2620.29	8.88616	0
vLFQPGSTQVk	19	5	1	W5PMT0	N-Term(iTRAQ8plex); K11(iTRAQ8plex)	0.949459	19	17.2757	0.80838	19	17.5103	0.753711	19	20.1658	0.834274	19	22.1521	0.744859	19	18.9911	30.63	3	1812.09	0.834437	0
gILFVGSGVSGGEDGAR	1	4	1	L8ISW4	N-Term(iTRAQ8plex)	1.02944	1		1.40975	1		1.2028	1		1.36734	1		1.42701	1		30.61	2	1881.99	-3.51921	0
eTAEEVk	1	18	1	D3G9G3	N-Term(iTRAQ8plex); K7(iTRAQ8plex)	0.780226	1		1.73405	1		0.328594	1		0.42918	1		0.446799	1		30.59	2	1413.79	-12.476	0
gSELQTQAk	2	6	1	Q7YRR7	N-Term(iTRAQ8plex); K9(iTRAQ8plex)	0.827954	2	4.51465	0.53733	2	1.80805	0.707642	2	57.2229	0.531196	2	19.3474	0.757148	2	26.3309	30.59	2	1569.9	-4.33785	0
iVTDLTk	128	8	3	P14639;X2GM95;P02769	N-Term(iTRAQ8plex); K7(iTRAQ8plex)																30.57	3	1397.88	-2.47582	0
dcQDVANk	3	5	1	W5Q5A6	N-Term(iTRAQ8plex); C2(Carbamidomethyl); K8(iTRAQ8plex)	1.70415	3	1.4395	2.87431	3	29.0146	3.23525	3	14.6723	1.58893	3	35.0377	1.36385	3	14.9548	30.56	2	1557.8	-6.51947	0
eLEGILLPSDR	1	5	1	S9X3E6	N-Term(iTRAQ8plex)	1.00277	1		0.993044	1		1.13397	1		1.38492	1		1.13892	1		30.48	2	1545.87	-5.49225	0
dYQELmNTk	1	6	2	A5A758;S9WX05	N-Term(iTRAQ8plex); M6(Oxidation); K9(iTRAQ8plex)																30.46	2	1765.92	-1.85499	0
qFQFIQVAGQLGDk	12	2	1	W5PNP1	N-Term(iTRAQ8plex); K14(iTRAQ8plex)	0.915541	12	18.6515	0.998066	12	21.4888	0.77547	12	13.0514	0.922508	12	14.2201	0.907429	12	21.5124	30.44	3	2187.24	-0.198506	0
dSADGFLk	2	5	1	W5PF65	N-Term(iTRAQ8plex); K8(iTRAQ8plex)	1.46713	2	55.498	1.24464	2	0.799055	1.65211	2	3.58295	0.694426	2	4.89545	0.4574	2	8.11519	30.37	2	1460.81	-6.05704	0
eLEIDDSASESVLDQVk	1	1	1	W5P8F9	N-Term(iTRAQ8plex); K17(iTRAQ8plex)	0.988025	1		0.744014	1		0.887562	1		1.07677	1		0.859176	1		30.37	3	2485.31	-1.39937	0
sLVNLGGSk	2	2	1	A5A758	N-Term(iTRAQ8plex); K9(iTRAQ8plex)	1.01389	2	2.83446	0.607048	2	1.00832	0.926864	2	1.58577	1.0163	2	3.59407	1.43253	2	3.49073	30.21	2	1482.91	-2.26413	0
vcNPIITk	1	8	1	P19120	N-Term(iTRAQ8plex); C2(Carbamidomethyl); K8(iTRAQ8plex)	0.731568	1		0.529496	1		0.512905	1		0.467582	1		0.386779	1		30.17	2	1552.94	5.19077	0
qQLDYGIYVINQAGESMFNR	1	6	1	E9NRZ3	N-Term(iTRAQ8plex)	0.968369	1		1.00503	1		1.13631	1		1.43332	1		1.52583	1		30.16	3	2650.33	0.511671	0
kENINELSk	78	11	4	D2DRB7;P04653;Q8MIH4;Q69EZ6	N-Term(iTRAQ8plex); K1(iTRAQ8plex); K9(iTRAQ8plex)																30.1	3	1987.19	-4.97009	1
lYDQLLQSYQQk	9	7	1	W5PZI1	N-Term(iTRAQ8plex); K12(iTRAQ8plex)	1.13329	9	10.8668	1.99043	9	12.622	0.901859	9	19.9155	1.03323	9	16.5207	1.07193	9	15.57	30.05	3	2135.19	-2.87234	0
aDIALIk	4	7	1	W5P3R3	N-Term(iTRAQ8plex); K7(iTRAQ8plex)	0.884719	2	1.20844	1.01102	2	17.879	1.25318	2	25.6777	0.875603	2	24.5913	0.959231	2	25.9272	30.04	2	1351.88	2.76025	0
eVWEELDGLDPNR	2	5	1	F1RIP6	N-Term(iTRAQ8plex)	0.978883	2	7.88824	0.728154	2	1.13311	0.785386	2	51.9467	0.833572	2	84.3768	0.830347	2	82.5495	29.95	3	1875.94	0.514565	0
mTITDQVNcPESM	1	4	1	F1MS32	N-Term(iTRAQ8plex); C9(Carbamidomethyl)	1.05649	1		1.09441	1		1.11657	1		0.824726	1		0.919156	1		29.92	2	1829.85	3.65995	0
mQPTGEPGk	1	2	2	W5P559;F1MK50	N-Term(iTRAQ8plex); K9(iTRAQ8plex)																29.89	3	1552.87	2.86344	0
lVGPEEALTPGEAR	1	7	1	A5JSS6	N-Term(iTRAQ8plex)	0.83301	1		0.590381	1		0.687014	1		0.663632	1		0.684852	1		29.88	2	1742.95	-5.77131	0
sAPSVTLFPPSk	8	1	1	W5PSQ7	N-Term(iTRAQ8plex); K12(iTRAQ8plex)	0.736685	8	5.78016	0.620367	8	22.5673	0.706332	8	25.303	0.845001	8	20.5789	1.02556	8	18.3369	29.79	3	1839.08	-1.48746	0
vLGPFcGEk	3	6	1	F1MVS9	N-Term(iTRAQ8plex); C6(Carbamidomethyl); K9(iTRAQ8plex)	0.963049	3	9.76013	0.967089	3	5.34879	1.33331	3	0.795432	1.20809	3	5.3276	1.56034	3	0.0845693	29.76	2	1614.9	-7.12256	0
sSSEESAEVAPEEVk	3	6	3	E7BQS5;P04654;E7BQS3	N-Term(iTRAQ8plex); K15(iTRAQ8plex)																29.76	3	2186.12	-2.4794	0
yIQkEDVPSER	100	10	4	D2DRB7;P04653;Q8MIH4;Q69EZ6	N-Term(iTRAQ8plex); K4(iTRAQ8plex)																29.7	2	1972.09	-3.83593	1
mYTSNYELk	10	1	1	W5PMH6	N-Term(iTRAQ8plex); K9(iTRAQ8plex)	1.71544	10	33.1349	1.45642	10	26.3637	2.22607	10	48.8172	3.31141	10	54.6567	2.54083	10	54.4103	29.69	2	1756.94	-1.94103	0
yGAEPATPVDPTTAIHLR	5	1	1	W5Q6U0	N-Term(iTRAQ8plex)	0.985914	5	80.2932	0.752554	5	43.4529	0.571726	5	43.3105	0.542241	5	63.4475	0.993485	5	50.2623	29.65	3	2213.19	1.885	0
iSLPFVNSSVSSLTVPSSNIR	3	1	1	W5P8F9	N-Term(iTRAQ8plex)	0.899881	3	6.37004	0.901649	3	6.43821	1.24074	3	22.5215	1.22441	3	10.3048	1.01698	3	2.05371	29.58	3	2508.39	-1.41733	0
nFEEVAFDEk	1	4	1	A6H7J6	N-Term(iTRAQ8plex); K10(iTRAQ8plex)	1.13	1		1.25215	1		0.828041	1		1.13489	1		1.03091	1		29.55	3	1835.96	-1.52659	0
vLPVPQk	326	26	4	P11839;R4R2H5;Q9TSI0;D7NJ85	N-Term(iTRAQ8plex); K7(iTRAQ8plex)																29.52	2	1388.9	-4.00287	0
sVVSGSINTVLGSR	6	2	1	A6ZE99	N-Term(iTRAQ8plex)	1.10908	6	9.27751	1.04851	6	3.14242	0.873257	6	14.1124	1.06018	6	28.0358	1.11322	6	41.894	29.49	2	1679.96	-0.649866	0
qEPGENSEILATLk	2	5	1	L8IG93	N-Term(iTRAQ8plex); K14(iTRAQ8plex)	0.981632	2	22.6236	1.00594	2	11.6652	0.827322	2	13.0193	0.925345	2	9.24799	0.903149	2	17.2586	29.49	3	2137.19	-1.1621	0
sELLVDQYLPLTk	1	11	2	A6ZE99;L8I632	N-Term(iTRAQ8plex); K13(iTRAQ8plex)																29.36	3	2127.24	-5.10294	0
vSFEGcTGLPR	1	3	1	C6EVT4	N-Term(iTRAQ8plex); C6(Carbamidomethyl)	0.889415	1		0.71049	1		0.714507	1		0.797682	1		1.05798	1		29.36	2	1526.79	-4.34	0
gVSTYLIPPTPLELYVNk	1	1	1	W5PGT9	N-Term(iTRAQ8plex); K18(iTRAQ8plex)	0.353937	1		0.378204	1		0.472917	1		0.520887	1		0.226822	1		29.34	3	2612.51	-0.617752	0
sLEDQVEVLR	1	2	1	Q28034	N-Term(iTRAQ8plex)	0.306056	1		0.381329	1		0.214181	1		0.238588	1		0.22861	1		29.28	2	1491.84	2.30288	0
aLNYEAk	1	1	1	W5PD71	N-Term(iTRAQ8plex); K7(iTRAQ8plex)	1.13636	1		0.898903	1		0.899633	1		1.00326	1		0.969683	1		29.23	2	1416.82	-5.56865	0
qGVQVLVSTR	1	3	2	W5Q6U0;Q06B57	N-Term(iTRAQ8plex)																29.21	2	1390.83	-0.9025	0
nFPAVLAGSLYTmSSQLTLPASLcPk	1	3	1	L8HP94	N-Term(iTRAQ8plex); M13(Oxidation); C24(Carbamidomethyl); K26(iTRAQ8plex)	0.758057	1		0.808098	1		1.35956	1		1.24309	1		1.59807	1		29.18	3	3390.82	-2.18812	0
aFLDccEYIAR	3	2	1	W5NRH2	N-Term(iTRAQ8plex); C5(Carbamidomethyl); C6(Carbamidomethyl)	1.03932	3	57.5906	0.961949	3	4.24398	0.883337	3	2.43754	0.751307	3	20.1515	0.902362	3	54.9583	29.15	2	1721.82	-2.63945	0
sPAQTLQWxVLPNTVPAk	4	2	1	A0SWQ7	N-Term(iTRAQ8plex); X9(L); K18(iTRAQ8plex)	1.17846	2	9.97338	1.0916	2	33.9268	1.36742	2	10.5873	1.34797	2	28.1656	1.53332	2	26.4642	29.14	4	2571.47	-17.3066	0
aGFAGDDAPR	3	34	1	A1E0X2	N-Term(iTRAQ8plex)	0.518109	3	6.57241	0.928345	3	4.2634	0.646127	3	2.8204	0.87242	3	5.54701	0.552546	3	24.5035	29.12	2	1280.65	-1.22132	0
lSSPATLNSR	3	3	1	P00761	N-Term(iTRAQ8plex)	1.43573	3	13.6566	1.44504	3	1.96906	2.52722	3	11.4468	3.8936	3	18.9364	3.0794	3	2.55376	29.02	2	1349.77	-1.50835	0
gAAPPPPLQNSSELR	1	3	1	E9NRZ3	N-Term(iTRAQ8plex)	1.387	1		1.1199	1		1.33918	1		1.75949	1		2.03768	1		28.99	2	1838.01	0.836466	0
yPVEPFTESQSLTLT	4	1	1	Q6UN62	N-Term(iTRAQ8plex)	1.17298	4	8.32016	1.16338	4	15.5385	1.46474	4	17.1659	1.77572	4	4.87874	1.82046	4	12.3647	28.95	2	2016.05	-0.434827	0
iLWESASLLR	3	11	3	Q2UVX4;W5NPK5;O46544	N-Term(iTRAQ8plex)																28.95	2	1491.88	-2.11849	0
eDVPSER	18	18	4	D2DRB7;P04653;Q8MIH4;Q69EZ6	N-Term(iTRAQ8plex)																28.94	2	1135.59	-1.86625	0
gLcIIPTk	8	11	2	W5PMT0;S9Y4T1	N-Term(iTRAQ8plex); C3(Carbamidomethyl); K8(iTRAQ8plex)																28.94	3	1509.93	0.426121	0
gSFLLGSPAAALSTLPVGAk	1	2	1	Q6IEB0	N-Term(iTRAQ8plex); K20(iTRAQ8plex)	1.35842	1		1.56671	1		2.51043	1		3.07045	1		2.12034	1		28.82	3	2465.46	0.835267	0
tSQGLETQQR	4	6	2	W5NRI1;Q2UVX4	N-Term(iTRAQ8plex)																28.8	2	1451.77	-2.12345	0
sPAQTLQWQVLANTVPAk	3	1	1	Q6YLM3	N-Term(iTRAQ8plex); K18(iTRAQ8plex)	0.93128	3	4.39954	0.788806	3	8.22657	1.1796	3	7.01297	1.12447	3	2.07637	1.3362	3	3.92102	28.8	3	2560.46	-4.62175	0
iFPGNMDNNSHk	2	9	3	W5PNP1;Q95114;G5CC03	N-Term(iTRAQ8plex); K12(iTRAQ8plex)																28.76	3	1982.03	-5.29289	0
tNLPSNTAFR	11	9	2	W5PMT0;S9Y4T1	N-Term(iTRAQ8plex)																28.75	2	1424.78	-0.254556	0
iLIDALQk	2	5	1	L8J0I1	N-Term(iTRAQ8plex); K8(iTRAQ8plex)	0.623632	2	8.60779	0.803358	2	28.0012	0.772716	2	27.0441	0.769089	2	50.6463	1.14662	2	29.3584	28.73	3	1521.98	-3.39213	0
eAcSVPVcGQDR	1	1	1	C8BKD1	N-Term(iTRAQ8plex); C3(Carbamidomethyl); C8(Carbamidomethyl)	0.716583	1		0.455123	1		0.542312	1		0.353978	1		0.462435	1		28.71	2	1681.79	-1.66727	0
aMAAEAEASR	1	7	1	T0MKA5	N-Term(iTRAQ8plex)	0.51433	1		0.444974	1		0.554057	1		0.49762	1		0.579719	1		28.66	2	1310.66	-4.84398	0
aTDEQLk	5	4	2	P14639;X2GM95	N-Term(iTRAQ8plex); K7(iTRAQ8plex)																28.64	2	1412.81	-6.25575	0
gNYDAAQR	5	23	3	W5PJR5;P42819;W5PJG0	N-Term(iTRAQ8plex)																28.62	2	1198.61	-5.15005	0
sPAQTLQWQVLPNTVPSk	1	1	1	G8FPL3	N-Term(iTRAQ8plex); K18(iTRAQ8plex)	0.837811	1		3.34885	1		1.34422	1		0.90584	1		0.9003	1		28.6	3	2602.45	-10.5749	0
lELLLQk	6	7	1	F1SL73	N-Term(iTRAQ8plex); K7(iTRAQ8plex)	0.786663	6	5.31685	0.646317	6	8.41541	1.07471	6	12.3213	1.06408	6	6.77381	1.16256	6	9.49129	28.52	2	1464.96	-3.58729	0
sVQLMEk	6	8	3	Q2UVX4;W5NRH2;S9XDK9	N-Term(iTRAQ8plex); K7(iTRAQ8plex)																28.5	2	1442.85	-3.01265	0
vVEESELAR	2	4	1	W5PID9	N-Term(iTRAQ8plex)	1.90605	2	6.21995	1.28056	2	2.75425	1.4273	2	2.3529	1.79126	2	5.41014	1.39914	2	11.9838	28.47	2	1335.74	-1.69609	0
tLLEGEESR	1	5	1	A5A758	N-Term(iTRAQ8plex)	1.32563	1		1.00783	1		1.29461	1		1.43788	1		1.93111	1		28.45	2	1337.72	-3.25382	0
lmELGHk	9	5	1	A5JSS7	N-Term(iTRAQ8plex); M2(Oxidation); K7(iTRAQ8plex)	0.994066	9	10.5664	0.66624	9	21.4611	0.755145	9	38.9934	1.28261	9	21.385	1.35047	9	38.8009	28.4	3	1451.85	-0.92179	0
sAAENEALTQLATAQNk	1	5	1	Q9XSQ2	N-Term(iTRAQ8plex); K17(iTRAQ8plex)	1.19912	1		1.03342	1		1.31053	1		1.36534	1		1.38373	1		28.32	3	2368.29	-1.70114	0
nGQPESEDkYGTTTSQLDADGSYFLYSR	1	1	1	W5PH95	N-Term(iTRAQ8plex); K9(iTRAQ8plex)	0.182686	1		0.129297	1		0.170496	1		0.139036	1		0.15778	1		28.3	3	3737.81	1.12597	1
aDIGcTPGSGR	5	5	2	W5NRI1;Q2UVX4	N-Term(iTRAQ8plex); C5(Carbamidomethyl)																28.29	2	1394.7	-1.40507	0
eLALcYGGmADR	2	8	2	W5PMT0;S9Y4T1	N-Term(iTRAQ8plex); C5(Carbamidomethyl); M9(Oxidation)																28.24	3	1675.81	2.03157	0
tSEATELVk	2	2	1	W5Q5A6	N-Term(iTRAQ8plex); K9(iTRAQ8plex)	1.88272	2	13.1919	2.50821	2	7.20803	2.25401	2	6.1302	1.25384	2	1.13575	1.11887	2	4.20756	28.17	3	1585.92	-3.71856	0
eLTEFAk	42	13	1	P14639	N-Term(iTRAQ8plex); K7(iTRAQ8plex)	0.892373	42	11.5115	0.965783	42	34.0919	1.6265	42	33.3009	1.04331	42	36.1943	1.0826	42	38.9442	28.08	2	1445.84	-3.311	0
dYVAQFEASALGk	4	9	1	W5NX51	N-Term(iTRAQ8plex); K13(iTRAQ8plex)	0.895492	2	4.28441	1.01134	2	11.8026	1.11438	2	6.49381	1.04417	2	11.7525	0.942479	2	8.80705	28.08	3	2007.09	-6.51225	0
vATPMNAEENR	1	6	1	B0BL70	N-Term(iTRAQ8plex)	0.85512	1		0.986156	1		0.579597	1		0.471139	1		0.368603	1		28.04	2	1535.78	1.02481	0
lVAALYk	5	13	1	A0FI82	N-Term(iTRAQ8plex); K7(iTRAQ8plex)	1.89192	5	31.6137	1.09723	5	26.3391	1.42794	5	51.9934	2.45017	5	30.7533	2.42014	5	32.5604	27.88	2	1385.89	-3.09775	0
ccTESLVNR	11	12	3	P14639;P02769;X2GM95	N-Term(iTRAQ8plex); C1(Carbamidomethyl); C2(Carbamidomethyl)																27.86	3	1442.71	1.32083	0
lVGQDVAk	4	5	1	A0FI82	N-Term(iTRAQ8plex); K8(iTRAQ8plex)	1.60708	4	15.3825	1.06503	4	31.4175	1.55352	4	42.5178	2.23287	4	36.777	1.88459	4	44.474	27.76	2	1437.89	-0.144682	0
lTVLGQPk	69	2	1	W5PSQ7	N-Term(iTRAQ8plex); K8(iTRAQ8plex)	0.280425	69	38.2932	0.210195	69	47.6931	0.240901	69	42.8597	0.214593	69	51.4408	0.256255	69	43.0267	27.71	2	1463.94	-1.49542	0
yLLFcMENSAEPEQSLAcQcL	1	4	1	Q8MHZ7	N-Term(iTRAQ8plex); C5(Carbamidomethyl); C18(Carbamidomethyl); C20(Carbamidomethyl)	1.56627	1		1.19411	1		1.88531	1		3.10684	1		2.63125	1		27.66	2	2867.31	4.05023	0
dVTLYEk	2	1	1	W5P3R3	N-Term(iTRAQ8plex); K7(iTRAQ8plex)	0.890945	2	19.6573	0.895442	2	3.09951	1.01652	2	2.37683	0.76334	2	19.8572	0.724834	2	39.1004	27.64	2	1475.86	-0.797518	0
gVFVLNk	6	7	3	Q2UVX4;W5NRI1;S9XDK9	N-Term(iTRAQ8plex); K7(iTRAQ8plex)																27.57	2	1384.88	0.0762773	0
sDTTATLTIR	2	2	1	F1MLW8	N-Term(iTRAQ8plex)	0.311915	2	11.0129	0.127214	2	3.38598	0.123031	2	14.5691	0.125063	2	11.9692	0.0945874	2	33.8561	27.54	2	1382.78	-1.10194	0
lPAVFk	288	15	2	P67975;G5E5H7	N-Term(iTRAQ8plex); K6(iTRAQ8plex)																27.5	3	1282.83	-0.719598	0
wENGEcAQk	4	15	2	P67975;G5E5H7	N-Term(iTRAQ8plex); C6(Carbamidomethyl); K9(iTRAQ8plex)																27.5	3	1729.87	-3.69719	0
lPILNQPTNQVVANAk	2	20	2	A6ZE99;L8I632	N-Term(iTRAQ8plex); K16(iTRAQ8plex)																27.43	4	2328.38	-1.19907	0
aPDFVFYAPR	1	19	1	L8IBW5	N-Term(iTRAQ8plex)	0.680067	1		0.936454	1		0.659024	1		0.4412	1		0.959082	1		27.41	2	1486.8	-1.82184	0
dQHPYLk	1	3	1	A6ZE99	N-Term(iTRAQ8plex); K7(iTRAQ8plex)	0.59567	1		0.536231	1		0.485854	1		0.479163	1		0.47402	1		27.37	2	1508.87	-0.35125	0
dIGPQLPEcEEDVScPEAPk	1	1	1	W5P0Q4	N-Term(iTRAQ8plex); C9(Carbamidomethyl); C15(Carbamidomethyl); K20(iTRAQ8plex)	2.01462	1		2.47242	1		1.93757	1		0.959902	1		0.669064	1		27.35	3	2878.41	0.211933	0
vDGALcTEk	2	3	1	W5QAB1	N-Term(iTRAQ8plex); C6(Carbamidomethyl); K9(iTRAQ8plex)	0.957856	2	3.12637	1.47373	2	22.9694	1.32983	2	28.0715	0.576786	2	22.2956	0.421264	2	31.933	27.3	2	1600.88	0.151622	0
eAAEVLTADMDAER	1	2	1	W5P5I0	N-Term(iTRAQ8plex)	0.876689	1		0.835866	1		0.758219	1		0.75928	1		0.803128	1		27.25	2	1824.9	0.611834	0
dGALELAR	2	6	1	Q2UVX4	N-Term(iTRAQ8plex)	2.34915	2	0.255576	2.56071	2	10.1891	1.37514	2	19.49	1.46035	2	5.36682	1.44187	2	2.82124	27.17	2	1148.66	-1.45199	0
sQIHDIVLVGGSTR	1	9	1	P19120	N-Term(iTRAQ8plex)	0.865023	1		0.638179	1		0.539767	1		0.657888	1		0.588252	1		27.04	3	1786.01	0.235872	0
vLGVPLck	6	3	1	L8IR26	N-Term(iTRAQ8plex); C7(Carbamidomethyl); K8(iTRAQ8plex)	1.04226	6	5.86179	1.10272	6	26.5881	1.01615	6	14.6292	0.975737	6	12.9197	0.766434	6	3.48783	26.98	3	1493.93	-3.30328	0
vbzVGAzALGR	2	15	2	P02080;P02075	N-Term(iTRAQ8plex); B2(D); Z3(E); Z7(E)																26.94	2	1419.77	-3.33738	0
lVIVGDGAcGk	1	7	1	P61585	N-Term(iTRAQ8plex); C9(Carbamidomethyl); K11(iTRAQ8plex)	0.770347	1		2.03682	1		0.996581	1		1.09285	1		1.02977	1		26.89	2	1696.98	-3.48162	0
vHLPDSER	4	3	1	L8I958	N-Term(iTRAQ8plex)	1.54125	4	13.9994	1.58857	4	41.4581	1.59719	4	39.3737	1.39182	4	14.8744	1.36852	4	11.6886	26.86	3	1256.69	-1.46038	0
tAEHFQEAVAESR	1	6	1	F1MKI5	N-Term(iTRAQ8plex)	1.62437	1		1.55129	1		1.05476	1		1.24304	1		1.05019	1		26.84	3	1778.89	-1.69596	0
eLIDQYDVQR	1	40	1	H9A6H7	N-Term(iTRAQ8plex)	1.0139	1		0.360088	1		0.195654	1		0.159872	1		0.15667	1		26.8	2	1582.84	1.05117	0
sMSAFQITTcTHR	1	1	1	W5PTZ8	N-Term(iTRAQ8plex); C10(Carbamidomethyl)	1.59125	1		1.67754	1		1.25102	1		0.972801	1		1.63199	1		26.77	3	1843.92	8.09111	0
gSLFFNPk	11	6	1	W5PZI1	N-Term(iTRAQ8plex); K8(iTRAQ8plex)	0.992134	11	5.36656	1.85749	11	28.3764	0.780299	11	16.4495	0.883985	11	6.98582	0.940712	11	12.8478	26.75	3	1517.89	-3.71383	0
gLcAIAQAESLR	1	6	1	Q862D8	N-Term(iTRAQ8plex); C3(Carbamidomethyl)	0.649249	1		0.919218	1		0.470675	1		0.331567	1		0.414191	1		26.72	2	1592.87	-2.91765	0
tVDQHQk	27	8	3	E7BQS5;P04654;E7BQS3	N-Term(iTRAQ8plex); K7(iTRAQ8plex)																26.68	2	1463.83	-5.88819	0
iLNVPLck	5	4	1	W5P256	N-Term(iTRAQ8plex); C7(Carbamidomethyl); K8(iTRAQ8plex)	0.775357	5	17.3473	0.867098	5	11.827	0.593996	5	5.54254	0.653436	5	15.4834	0.576329	5	7.12834	26.64	3	1564.97	0.492848	0
vQPYLDEFQk	8	6	1	W5NX51	N-Term(iTRAQ8plex); K10(iTRAQ8plex)	1.2646	8	18.0223	1.3266	8	6.51989	1.68257	8	12.3345	1.46534	8	11.9786	1.57824	8	12.8272	26.61	3	1875.05	-0.209692	0
qDGQFSVLFTk	4	4	1	L8HQH4	N-Term(iTRAQ8plex); K11(iTRAQ8plex)	1.22335	4	16.7238	1.23213	4	9.78892	1.51336	4	1.53258	1.49331	4	5.03423	1.42364	4	7.86453	26.59	3	1878.05	-3.28864	0
eASVQEIPVSR	2	2	1	W5P3R3	N-Term(iTRAQ8plex)	0.896688	2	33.2328	1.1814	2	14.4602	1.01715	2	17.0984	0.614452	2	22.9627	0.733089	2	13.1534	26.43	2	1518.84	-1.37828	0
hQPQEFPTYVEPTNDEIcEAFR	2	8	1	W5PTG9	N-Term(iTRAQ8plex); C18(Carbamidomethyl)	1.16206	2	7.38608	0.862399	2	15.8787	1.11533	2	20.6613	0.838944	2	6.53906	0.666521	2	53.0303	26.38	3	3011.4	-4.43779	0
lkPEPDTLcAEFk	25	3	1	P14639	N-Term(iTRAQ8plex); K2(iTRAQ8plex); C9(Carbamidomethyl); K13(iTRAQ8plex)	0.871458	25	10.3255	0.933919	25	15.8606	1.38093	25	12.7295	1.00687	25	12.7621	1.06295	25	15.8788	26.36	3	2460.4	1.37395	0
sPAQTLQWxVLPNTVPAk	8	2	1	A0SWQ7	N-Term(iTRAQ8plex); X9(W); K18(iTRAQ8plex)	1.23779	8	24.1536	0.945265	8	13.3246	1.15996	8	9.6371	1.26104	8	10.3858	1.48485	8	15.0285	26.21	3	2644.51	0.390078	0
aLYASk	4	19	3	W5PMT0;S9Y4T1;L8ISW4	N-Term(iTRAQ8plex); K6(iTRAQ8plex)																26.2	3	1260.77	-3.36178	0
lcMAALk	4	8	1	W5PTG9	N-Term(iTRAQ8plex); C2(Carbamidomethyl); K7(iTRAQ8plex)	0.426463	4	126.668	0.455274	4	101.452	0.594419	4	109.291	0.517248	4	79.1574	0.634934	4	107.229	26.2	2	1414.84	-1.45371	0
dYQELMNTk	3	6	2	A5A758;S9WX05	N-Term(iTRAQ8plex); K9(iTRAQ8plex)																26.2	3	1749.93	-0.320995	0
mLFNQQELFGR	2	7	1	W5PFC9	N-Term(iTRAQ8plex)	1.02713	2	19.9772	0.876466	2	0.742464	1.05221	2	9.44331	1.11017	2	1.17946	1.09665	2	7.85335	26.19	2	1686.89	-1.00883	0
gYSFTTTAER	1	38	1	A1E0X2	N-Term(iTRAQ8plex)	0.683978	1		1.13335	1		0.578216	1		0.408792	1		0.624067	1		26.11	2	1436.73	-2.78565	0
aSDDGEYR	7	10	1	W5NPT7	N-Term(iTRAQ8plex)	0.920816	7	12.6924	0.787006	7	21.6335	0.904797	7	26.526	0.850458	7	9.81152	0.878495	7	8.95444	26.06	2	1216.57	-2.61431	0
eAQGGATk	3	1	1	W5PCT4	N-Term(iTRAQ8plex); K8(iTRAQ8plex)	1.10941	3	2.47008	1.03323	3	7.97476	0.974395	3	2.12339	1.19387	3	0.496174	0.528977	3	6.51107	26.04	2	1369.79	-2.83195	0
sVEDcAAk	1	6	2	W5P3R3;Q7M323	N-Term(iTRAQ8plex); C5(Carbamidomethyl); K8(iTRAQ8plex)																25.94	2	1487.8	-1.5023	0
gEEFPSmSESR	4	6	1	W5NPT7	N-Term(iTRAQ8plex); M7(Oxidation)	1.54764	4	35.591	1.22915	4	19.42	1.2014	4	30.6535	1.68536	4	21.0373	1.55937	4	32.3842	25.87	2	1575.72	-1.49883	0
nEcFLNHk	2	2	1	P14639	N-Term(iTRAQ8plex); C3(Carbamidomethyl); K8(iTRAQ8plex)	1.61038	2	44.1969	4.72015	2	0.197379	3.79011	2	26.8875	3.70708	2	44.9756	2.96861	2	49.5335	25.75	2	1669.89	-1.94661	0
lQAANAEDIk	2	5	1	F1RIP6	N-Term(iTRAQ8plex); K10(iTRAQ8plex)	0.748232	2	13.0771	1.02522	2	12.5105	0.993906	2	5.30062	1.05271	2	8.34102	0.843302	2	5.90827	25.74	3	1680.98	0.764228	0
vLQSDLVMNVYR	1	5	2	W5Q6U0;Q06B57	N-Term(iTRAQ8plex)																25.72	2	1740.96	-3.33549	0
sPAQTLQWxVLPNTVPAk	42	70	2	A0SWQ7;D2SZE3	N-Term(iTRAQ8plex); X9(Q); K18(iTRAQ8plex)																25.68	2	2586.45	-14.8449	0
eDEFFSAFk	17	8	1	W5PMT0	N-Term(iTRAQ8plex); K9(iTRAQ8plex)	1.03768	17	51.25	0.762366	17	12.9235	0.680998	17	8.16293	0.794371	17	10.7198	0.753536	17	4.69476	25.54	3	1727.91	-0.967017	0
sPAQTLQWQILPNTVPAk	3	1	1	Q5C9G9	N-Term(iTRAQ8plex); K18(iTRAQ8plex)	0.964763	3	9.95579	0.905445	3	8.03764	0.899549	3	14.9681	0.988206	3	23.0594	1.35451	3	19.2432	25.52	3	2600.48	-9.9916	0
dHSPDVLSAQVR	1	1	1	W5NRG7	N-Term(iTRAQ8plex)	0.890075	1		4.02072	1		0.537459	1		0.573788	1		0.650058	1		25.46	3	1627.88	4.84116	0
vDLEDYk	3	4	1	W5Q5H8	N-Term(iTRAQ8plex); K7(iTRAQ8plex)	1.6228	3	11.9598	1.40244	3	6.95328	1.49976	3	9.01003	1.19745	3	17.0764	1.25544	3	0.00518896	25.45	2	1489.83	-5.22931	0
nPDVNPEALEAFk	2	3	1	F1MK50	N-Term(iTRAQ8plex); K13(iTRAQ8plex)	1.19935	2	13.8092	0.850103	2	20.1272	0.915332	2	19.9405	1.49887	2	11.8562	1.23061	2	6.86083	25.44	3	2052.12	0.116648	0
vFTPEELEAEIGR	1	2	1	Q2TBX4	N-Term(iTRAQ8plex)	0.924575	1		0.554882	1		0.627823	1		0.795227	1		0.867547	1		25.4	2	1793.95	-2.15151	0
aLPmHIQLAFNPTQLEGQcHV	5	1	1	Q9XSC0	N-Term(iTRAQ8plex); M4(Oxidation); C19(Carbamidomethyl)	0.984619	5	4.70085	1.03159	5	37.46	1.14341	5	5.14906	2.99765	5	13.4617	1.33484	5	26.7181	25.37	3	2724.39	0.517004	0
aGSSSSSEEIVPNSAQQk	1	1	1	Q8MIH4	N-Term(iTRAQ8plex); K18(iTRAQ8plex)	1.43711	1		0.977522	1		0.682144	1		1.0086	1		0.920613	1		25.36	4	2414.25	-3.98933	0
vLSLSQPk	3	1	1	R4R2H5	N-Term(iTRAQ8plex); K8(iTRAQ8plex)	0.994417	3	15.9464	1.11526	3	0.622145	1.22696	3	2.62005	1.48891	3	2.65345	2.18444	3	19.747	25.35	2	1479.93	-4.96856	0
vQAELDETk	1	4	1	F1SSG1	N-Term(iTRAQ8plex); K9(iTRAQ8plex)	0.966579	1		0.806377	1		0.783002	1		0.8672	1		0.920088	1		25.35	2	1640.93	-0.362903	0
gEAGEMELFASTQNPMk	1	2	1	W5PMT0	N-Term(iTRAQ8plex); K17(iTRAQ8plex)	0.890754	1		1.05648	1		0.769646	1		0.899952	1		0.872879	1		25.2	3	2448.24	0.0767376	0
aGYTLVk	2	3	1	W5QAB1	N-Term(iTRAQ8plex); K7(iTRAQ8plex)	1.2566	2	5.95632	1.4692	2	3.9285	1.86312	2	6.63136	0.748144	2	17.1321	0.663423	2	8.83289	25.19	2	1359.84	-5.1938	0
tQVEDAFR	1	5	1	Q06B57	N-Term(iTRAQ8plex)	0.707287	1		1.59726	1		0.945664	1		0.687306	1		0.662059	1		25.18	2	1269.67	-2.95795	0
sPAQTLQWxVLPNTVPAk	24	2	1	A0SWQ7	N-Term(iTRAQ8plex); X9(D); K18(iTRAQ8plex)	1.07714	24	15.392	0.93531	24	14.4174	1.16274	24	19.3216	1.18819	24	20.8409	1.47665	24	24.6019	25.17	4	2573.45	-2.02282	0
qFLSSSTTISR	1	1	1	W5Q5H8	N-Term(iTRAQ8plex)	0.83906	1		0.930592	1		0.707584	1		0.443754	1		0.347792	1		25.08	2	1530.84	-4.30483	0
vGLHEVEVk	1	4	1	W5NPK5	N-Term(iTRAQ8plex); K9(iTRAQ8plex)	0.727229	1		1.02329	1		1.07898	1		1.01385	1		0.930875	1		25.04	3	1617.97	-4.27113	0
iEDSFSVk	1	7	1	Q7M364	N-Term(iTRAQ8plex); K8(iTRAQ8plex)	0.920279	1		1.06042	1		1.14343	1		1.01873	1		1.03922	1		25.01	3	1532.87	-3.42163	0
kISQYYQk	27	8	3	E7BQS5;P04654;E7BQS3	N-Term(iTRAQ8plex); K1(iTRAQ8plex); K8(iTRAQ8plex)																24.95	3	1970.18	-3.94015	1
dLIVPNDVYR	1	3	1	W5PQH0	N-Term(iTRAQ8plex)	0.661219	1		0.425894	1		0.337426	1		0.340394	1		0.498358	1		24.89	2	1507.84	-0.573739	0
tALSSEAPTTR	3	3	1	Q9MZY2	N-Term(iTRAQ8plex)	1.74619	3	31.1602	2.24015	3	23.0444	2.03332	3	67.1647	1.33756	3	30.7282	1.47149	3	16.128	24.88	2	1437.78	-3.32475	0
lRPLVEQSQSR	1	2	1	Q7M2U8	N-Term(iTRAQ8plex)	0.666799	1		1.32829	1		0.279792	1		0.255425	1		0.283426	1		24.86	3	1616.94	-1.10677	0
aSDADLNWNNLk	4	1	1	W5PF65	N-Term(iTRAQ8plex); K12(iTRAQ8plex)	1.18967	4	2.90826	1.30388	4	4.37149	1.4153	4	16.1902	1.30159	4	4.89287	1.17679	4	10.3032	24.84	3	1969.06	-1.757	0
gcDVVVIPAGVPR	1	13	1	Q0QF27	N-Term(iTRAQ8plex); C2(Carbamidomethyl)	1.47967	1		1.0459	1		0.601447	1		0.345351	1		0.384233	1		24.83	2	1642.92	-5.60715	0
tGTVLLEVR	1	3	2	W5Q6U0;Q06B57	N-Term(iTRAQ8plex)																24.76	2	1291.78	-3.39216	0
sPAQTLQWxVLPNTVPAk	3	2	1	A0SWQ7	N-Term(iTRAQ8plex); X9(P); K18(iTRAQ8plex)	1.09445	3	30.8323	0.882989	3	61.9066	0.816863	3	7.27213	1.07033	3	29.9788	1.19269	3	45.413	24.75	5	2555.45	-10.331	0
gGVASGFk	1	8	1	T0MIA6	N-Term(iTRAQ8plex); K8(iTRAQ8plex)	1.01844	1		0.969411	1		1.26049	1		1.49784	1		1.72282	1		24.73	2	1330.79	-4.5401	0
sPAQTLQWEVLPNTVPAk	12	5	1	A0SWQ7	N-Term(iTRAQ8plex); K18(iTRAQ8plex)	1.03439	6	14.3748	0.823591	6	10.5814	1.0483	6	11.6565	1.14951	6	9.44392	1.44487	6	18.0207	24.69	3	2587.48	4.25826	0
lGMLSSEGTck	2	1	1	W5Q6U0	N-Term(iTRAQ8plex); C10(Carbamidomethyl); K11(iTRAQ8plex)	0.951347	2	50.37	1.53624	2	38.2543	0.833601	2	11.1619	0.823915	2	17.5358	0.724414	2	4.0594	24.61	2	1790.96	-1.34905	0
nGQPESEDk	3	1	1	W5PH95	N-Term(iTRAQ8plex); K9(iTRAQ8plex)	0.535111	3	14.8509	0.377347	3	4.62173	0.583044	3	1.08202	0.703528	3	13.3955	0.865125	3	58.0165	24.6	3	1611.84	-4.04078	0
kEEQDQFk	2	1	1	W5PMH6	N-Term(iTRAQ8plex); K1(iTRAQ8plex); K8(iTRAQ8plex)	1.52716	2	1.43138	1.10962	2	11.1332	2.04347	2	5.38951	2.98457	2	0.990149	2.79148	2	1.06937	24.6	2	1964.12	-1.47209	1
fYYVDDPDGLk	8	1	1	W5NRI1	N-Term(iTRAQ8plex); K11(iTRAQ8plex)	0.897131	8	17.6518	1.08227	8	10.1333	1.12235	8	6.69437	1.1738	8	8.79526	1.13755	8	4.14001	24.58	3	1940.02	-2.52415	0
iEENVEELR	2	4	2	W5NWM2;F1N3Q7	N-Term(iTRAQ8plex)																24.48	2	1434.77	-4.76016	0
tLIYNVNk	4	3	1	W5PSP9	N-Term(iTRAQ8plex); K8(iTRAQ8plex)	0.266464	4	9.41129	0.301496	4	23.5153	0.383982	4	33.7315	0.246691	4	21.513	0.34937	4	6.6813	24.46	3	1572.96	-0.0438684	0
dVEELSk	1	3	1	W5QAB1	N-Term(iTRAQ8plex); K7(iTRAQ8plex)	1.6884	1		1.07601	1		1.45919	1		1.04975	1		1.1064	1		24.32	2	1427.81	-6.21539	0
fWTFPEVLR	3	2	1	W5NXW9	N-Term(iTRAQ8plex)	0.589392	3	33.4442	1.20875	3	98.7577	0.571598	3	40.9525	0.439296	3	58.2051	0.242599	3	3.69192	24.22	3	1498.84	-0.277454	0
sGSDEVQVk	4	5	1	Q2UVX4	N-Term(iTRAQ8plex); K9(iTRAQ8plex)	0.715912	4	7.7698	0.925793	4	13.1761	0.943827	4	10.7605	0.998759	4	11.1209	0.997465	4	11.7863	24.21	2	1556.87	-2.79715	0
qYGFck	1	6	1	L8HQH4	N-Term(iTRAQ8plex); C5(Carbamidomethyl); K6(iTRAQ8plex)	0.673074	1		0.87798	1		1.29752	1		0.918882	1		0.838678	1		24.15	3	1410.76	-0.764895	0
aEDVVLEHR	1	7	1	Q58D04	N-Term(iTRAQ8plex)	1.22299	1		1.28779	1		1.06715	1		1.37479	1		1.67358	1		24.11	3	1371.75	-0.704397	0
tkIPAVFk	54	15	2	P67975;G5E5H7	N-Term(iTRAQ8plex); K2(iTRAQ8plex); K8(iTRAQ8plex)																24.1	4	1816.18	1.17149	1
vFTTVGSAEk	1	5	1	W5Q6U0	N-Term(iTRAQ8plex); K10(iTRAQ8plex)	0.698112	1		2.17843	1		2.62828	1		1.09787	1		1.12524	1		24.07	3	1646.95	-2.70578	0
lVEQQNPk	4	5	1	E9NRZ3	N-Term(iTRAQ8plex); K8(iTRAQ8plex)	0.736057	4	3.67737	0.775181	4	17.7336	0.918893	4	9.01523	0.842518	4	25.1847	0.798813	4	28.4031	24.05	2	1563.93	0.0542565	0
mLGVPVNR	4	8	1	W5PMT0	N-Term(iTRAQ8plex)	0.995123	4	11.3183	0.821582	4	5.00012	0.735286	4	7.52205	0.85911	4	8.14425	0.79045	4	1.14019	24.02	2	1189.7	-0.695413	0
dLcETVk	2	9	3	W5NPK5;O46544;Q2UVX4	N-Term(iTRAQ8plex); C3(Carbamidomethyl); K7(iTRAQ8plex)																23.95	2	1472.81	-6.21968	0
fQSEEQRQTEDELQDk	2	1	1	D7NJ85	N-Term(iTRAQ8plex); K16(iTRAQ8plex)	2.42153	2	2.61773	3.04611	2	9.89678	0.809374	2	25.145	0.90906	2	4.54087	0.850963	2	11.2946	23.86	3	2618.3	-6.83297	1
tVSTEcAk	1	1	1	W5PGT9	N-Term(iTRAQ8plex); C6(Carbamidomethyl); K8(iTRAQ8plex)	0.24043	1		0.109457	1		0.150261	1		0.166996	1		0.124388	1		23.83	2	1503.83	-1.51289	0
tHkGEEFPSMSESR	2	1	1	W5NPT7	N-Term(iTRAQ8plex); K3(iTRAQ8plex)	0.879111	2	16.464	0.997403	2	35.498	0.855152	2	24.6004	0.808919	2	19.204	0.780838	2	22.547	23.75	4	2230.13	-1.73585	1
fFTFHADIcTLPDTEk	1	2	1	P14639	N-Term(iTRAQ8plex); C9(Carbamidomethyl); K16(iTRAQ8plex)	0.965473	1		0.902538	1		1.38959	1		0.844103	1		0.975365	1		23.69	4	2550.3	-5.02058	0
tDWAIGVcR	6	11	1	W5NPT7	N-Term(iTRAQ8plex); C8(Carbamidomethyl)	1.05299	6	12.6971	0.989058	6	18.2712	0.969821	6	11.5368	0.989719	6	24.5297	0.890283	6	16.4255	23.63	2	1381.72	-2.19926	0
vAILIPFR	4	9	2	F1SE74;E9NRZ3	N-Term(iTRAQ8plex)																23.62	2	1232.8	-1.77507	0
mVQEAEk	2	42	2	K8FK38;P19120	N-Term(iTRAQ8plex); K7(iTRAQ8plex)																23.58	2	1442.81	-3.68746	0
lScHFPck	1	10	2	W5P9V5;A6QNW3	N-Term(iTRAQ8plex); C3(Carbamidomethyl); C7(Carbamidomethyl); K8(iTRAQ8plex)																23.57	3	1656.88	-2.51925	0
mSAVTGPVPR	1	1	1	W5Q5H8	N-Term(iTRAQ8plex); M1(Oxidation)	2.06865	1		2.7413	1		2.33782	1		1.31765	1		1.13545	1		23.53	2	1334.74	-1.38103	0
lPPNVVEESAR	1	4	1	W5NSA6	N-Term(iTRAQ8plex)	1.33975	1		1.40253	1		1.16421	1		0.772452	1		0.656725	1		23.51	2	1514.84	-2.4051	0
sPAQTxQWQVLPNAVPAk	10	1	1	D2SZC1	N-Term(iTRAQ8plex); X6(W); K18(iTRAQ8plex)	0.844576	10	25.8777	0.93422	10	51.2473	1.07244	10	29.0421	1.08073	10	36.5597	1.23766	10	21.5251	23.49	2	2629.49	7.28304	0
iEANQGSR	2	1	1	W5NRI1	N-Term(iTRAQ8plex)	0.887081	2	1.51777	0.979516	2	18.5795	0.935104	2	21.0513	1.09733	2	5.10244	1.18232	2	31.9421	23.43	2	1178.64	-0.731169	0
vAYSNDGR	2	2	1	W5PNP1	N-Term(iTRAQ8plex)	0.853509	2	16.5483	0.646988	2	20.7369	0.630601	2	10.0669	0.822419	2	8.61749	0.688093	2	16.2118	23.43	2	1185.62	-0.667202	0
mPEDcVPTFR	3	3	1	W5PSD8	N-Term(iTRAQ8plex); C5(Carbamidomethyl)	1.28645	3	7.01502	0.963357	3	10.6495	0.948064	3	3.987	0.767937	3	0.129725	0.894767	3	0.992364	23.42	3	1555.75	-1.67748	0
sPAQTLQWQVLPNxVPAk	1	3	1	D2SZE3	N-Term(iTRAQ8plex); X14(D); K18(iTRAQ8plex)	1.07195	1		1.57048	1		2.77419	1		1.1911	1		1.01073	1		23.42	3	2600.46	-1.9165	0
sPAQTLQWQVLPNTLPAk	1	2	0		N-Term(iTRAQ8plex); K18(iTRAQ8plex)																23.42	3	2600.46	-15.9063	0
fQDANVLLTFR	1	2	1	W5PSA3	N-Term(iTRAQ8plex)	0.813407	1		0.745115	1		0.644948	1		1.3236	1		1.21935	1		23.31	2	1627.91	-2.27724	0
gEAGEmELFASTQNPmk	4	2	1	W5PMT0	N-Term(iTRAQ8plex); M6(Oxidation); M16(Oxidation); K17(iTRAQ8plex)	1.16886	4	4.20073	1.49225	4	12.1486	1.10692	4	7.99876	1.30569	4	8.24785	1.15007	4	7.80563	23.19	3	2480.22	-1.18852	0
iHDAQDk	5	1	1	A6ZE99	N-Term(iTRAQ8plex); K7(iTRAQ8plex)	1.08406	5	7.83849	0.921659	5	4.62812	0.96383	5	4.7077	1.15862	5	9.67462	1.11812	5	15.4717	23.16	3	1434.81	-4.68387	0
fLDDDLTDDIMcVk	4	32	2	Q69B57;Q69B46	N-Term(iTRAQ8plex); C12(Carbamidomethyl); K14(iTRAQ8plex)																23.14	3	2308.17	2.22406	0
lDSPATPEk	5	12	2	W5PMT0;S9Y4T1	N-Term(iTRAQ8plex); K9(iTRAQ8plex)																23.09	2	1565.9	-1.83106	0
aTEGEGSEQk	1	7	1	Q7M364	N-Term(iTRAQ8plex); K10(iTRAQ8plex)	1.00051	1		1.09536	1		1.56868	1		1.24678	1		1.21628	1		23.07	3	1643.86	-4.28094	0
acGVcPLWEk	1	4	1	L8IW97	N-Term(iTRAQ8plex); C2(Carbamidomethyl); C5(Carbamidomethyl); K10(iTRAQ8plex)	1.44147	1		1.11487	1		1.07497	1		1.10821	1		0.992816	1		23.04	3	1827.97	-0.69795	0
vLSPAGPEAQFELR	1	1	1	Q2KJF1	N-Term(iTRAQ8plex)	2.08322	1		1.18757	1		1.34391	1		1.07508	1		1.12101	1		22.98	2	1818	-2.19712	0
gIVGSFEELcR	1	3	1	W5PCL4	N-Term(iTRAQ8plex); C10(Carbamidomethyl)	1.44872	1		1.41178	1		1.23641	1		1.50756	1		1.33094	1		22.85	2	1570.82	-1.17162	0
lDQQVEDFR	1	4	2	W5NWM2;F1N3Q7	N-Term(iTRAQ8plex)																22.73	2	1453.75	-6.16734	0
iFADADLSGITGTR	2	1	1	W5PHI7	N-Term(iTRAQ8plex)	0.833959	2	2.47195	1.10844	2	6.44772	1.0844	2	0.703502	0.756463	2	3.85213	0.798983	2	14.308	22.69	2	1740.95	1.81482	0
yDSTHGR	8	3	1	Q2KJE5	N-Term(iTRAQ8plex)	1.48714	8	95.0151	1.99151	8	20.3954	1.53083	8	66.4816	3.05235	8	59.7496	4.28483	8	28.3464	22.66	3	1139.57	-4.71428	0
sGVSLAALk	2	15	1	Q53DY7	N-Term(iTRAQ8plex); K9(iTRAQ8plex)	1.02637	2	4.838	1.12097	2	3.40694	0.619124	2	15.1442	0.569044	2	0.391445	0.764541	2	2.40223	22.61	2	1453.91	-5.55091	0
qPQNQNPk	7	4	1	A5JSS7	N-Term(iTRAQ8plex); K8(iTRAQ8plex)	1.06373	7	12.7617	0.788074	7	50.1019	1.17934	7	58.4272	2.48034	7	71.0376	2.34973	7	43.1028	22.53	2	1561.89	-3.59433	0
sAAENEAVTQLVR	1	1	1	W5NUD7	N-Term(iTRAQ8plex)	2.10541	1		1.4802	1		2.08312	1		1.34479	1		2.11268	1		22.53	2	1691.92	-1.58141	0
tPEVDNEALEkFDk	8	3	1	P67975	N-Term(iTRAQ8plex); K11(iTRAQ8plex); K14(iTRAQ8plex)	0.307303	8	18.2074	0.273946	8	18.5406	0.167874	8	40.835	0.129668	8	46.5113	0.160575	8	19.5368	22.53	4	2547.4	-1.18549	1
scQDQPTxmAR	1	1	1	D2SZA9	N-Term(iTRAQ8plex); C2(Carbamidomethyl); X8(V); M9(Oxidation)	1.2743	1		1.38191	1		1.44437	1		1.61362	1		1.74525	1		22.46	2	1612.77	-1.67247	0
aPNHAVVSR	3	3	1	W5PF65	N-Term(iTRAQ8plex)	1.31656	3	28.347	1.25247	3	5.04586	1.32821	3	8.56735	1.21875	3	0.481152	0.831035	3	21.4551	22.44	3	1254.72	-3.20398	0
dGNTLTYYR	1	3	1	W5PID9	N-Term(iTRAQ8plex)	1.67722	1		1.68089	1		1.63843	1		2.08205	1		2.02982	1		22.43	2	1406.72	-1.39839	0
lSSATLASSPNR	2	2	1	E1BGX8	N-Term(iTRAQ8plex)	1.78343	2	57.8662	2.01634	2	5.94274	1.92004	2	54.0513	1.49267	2	87.7604	1.35545	2	84.4411	22.3	2	1507.83	-3.49373	0
gDVFTHYTck	5	2	1	W5PNP1	N-Term(iTRAQ8plex); C9(Carbamidomethyl); K10(iTRAQ8plex)	0.891767	5	5.92861	0.90847	5	22.1271	0.720584	5	16.5927	0.82941	5	6.19647	0.806498	5	10.3515	22.26	3	1835.95	-1.54609	0
eTLQQMAEVTR	1	4	1	Q28034	N-Term(iTRAQ8plex)	0.476938	1		0.49984	1		0.410117	1		0.512917	1		0.705843	1		22.24	2	1609.85	-2.23186	0
vTMQNLNDR	1	26	2	W5Q6L8;S9WUY9	N-Term(iTRAQ8plex)																21.98	2	1394.73	-1.22931	0
tLIYNLNk	8	1	1	L8HU38	N-Term(iTRAQ8plex); K8(iTRAQ8plex)	0.409361	8	28.0769	0.398383	8	11.0291	0.538156	8	27.475	0.379539	8	19.3847	0.458035	8	25.5367	21.96	3	1586.97	1.09457	0
qIPGSAPk	2	1	1	A5PK72	N-Term(iTRAQ8plex); K8(iTRAQ8plex)	0.522937	2	38.7016	0.384795	2	5.08063	0.343475	2	14.0724	0.291249	2	24.0413	0.391888	2	21.8167	21.81	3	1405.86	0.0633722	0
dVSSLDGTQR	1	3	2	W5Q6U0;Q06B57	N-Term(iTRAQ8plex)																21.71	2	1381.72	-2.06207	0
eYVLPSFEVQLEPEEk	1	5	2	W5NRI1;Q2UVX4	N-Term(iTRAQ8plex); K16(iTRAQ8plex)																21.7	3	2544.37	0.678597	0
gTEATcTR	1	2	1	D6PZY4	N-Term(iTRAQ8plex); C6(Carbamidomethyl)	1.50479	1		1.40039	1		1.62728	1		1.17004	1		0.713143	1		21.65	2	1199.6	0.987075	0
aLPVSLADGR	1	1	1	W5P8R7	N-Term(iTRAQ8plex)	0.65312	1		0.755199	1		0.455443	1		0.439115	1		0.49857	1		21.65	2	1302.76	-3.0792	0
dFMIxGGDFTR	2	9	1	Q5TIK9	N-Term(iTRAQ8plex); X5(Q)	1.04096	1		0.663693	1		0.595915	1		0.782805	1		0.70403	1		21.64	2	1590.79	1.32629	0
eQQcVIMGESSk	1	1	1	W5P3R3	N-Term(iTRAQ8plex); C4(Carbamidomethyl); K12(iTRAQ8plex)	0.901584	1		0.906469	1		1.23594	1		1.00946	1		0.984037	1		21.62	2	2004.04	1.34829	0
eQGQNLAR	1	5	1	I3LF84	N-Term(iTRAQ8plex)	1.22684	1		0.953219	1		1.00419	1		1.0584	1		0.989913	1		21.39	2	1219.67	2.44633	0
sHcIAEVDk	1	2	1	P14639	N-Term(iTRAQ8plex); C3(Carbamidomethyl); K9(iTRAQ8plex)	1.13373	1		0.971492	1		0.988712	1		1.08971	1		1.13387	1		21.39	3	1666.9	-3.19477	0
tVYVSDDTR	1	6	1	C6EVT4	N-Term(iTRAQ8plex)	0.896077	1		0.751182	1		0.964317	1		0.825326	1		1.00164	1		21.29	2	1359.71	-0.385014	0
tVGWNVPVGYLVESGR	1	6	1	E1BG25	N-Term(iTRAQ8plex)	0.740388	1		0.828154	1		0.522036	1		0.476321	1		0.387548	1		21.23	2	2037.1	-2.77025	0
lLDNWDTLASTLSk	1	5	1	W5NX51	N-Term(iTRAQ8plex); K14(iTRAQ8plex)	1.18795	1		1.06276	1		1.04246	1		1.14207	1		1.30511	1		21.22	3	2185.23	0.0630747	0
eTGWPFcADEDWGEk	1	1	1	W5Q5H8	N-Term(iTRAQ8plex); C7(Carbamidomethyl); K15(iTRAQ8plex)	1.51964	1		1.65735	1		1.82075	1		1.33489	1		1.34603	1		21.05	3	2435.15	2.08504	0
vAcTVPSEcEk	2	6	1	F1MD24	N-Term(iTRAQ8plex); C3(Carbamidomethyl); C9(Carbamidomethyl); K11(iTRAQ8plex)	1.00959	2	23.8848	1.23885	2	21.9691	1.26302	2	0.0113518	1.2981	2	5.10296	1.29903	2	10.2011	20.87	3	1887.98	1.16132	0
nIcxIScDk	1	2	1	Q69B46	N-Term(iTRAQ8plex); C3(Carbamidomethyl); X4(M); C7(Carbamidomethyl); K9(iTRAQ8plex)	1.89126	1		1.64728	1		2.21439	1		2.81184	1		1.7425	1		20.83	3	1748.88	-9.51009	0
dFVPNSVSFSWk	4	2	1	W5NXW9	N-Term(iTRAQ8plex); K12(iTRAQ8plex)	0.524317	4	10.8377	0.432672	4	9.47735	0.424939	4	10.8991	0.482208	4	33.6273	0.52885	4	34.6368	20.76	3	2021.09	-1.1888	0
sPAQTLQWxVLPNTVPAk	5	2	1	A0SWQ7	N-Term(iTRAQ8plex); X9(M); X9(Oxidation); K18(iTRAQ8plex)	1.11103	5	11.342	0.846287	5	29.0727	1.19021	5	16.8478	2.07958	5	37.7433	2.22434	5	33.8078	20.76	3	2605.43	-11.356	0
eDALNDTR	1	7	1	W5PZI1	N-Term(iTRAQ8plex)	1.5989	1		4.97317	1		1.42191	1		1.51828	1		2.27975	1		20.67	2	1237.63	0.29158	0
hAVSEGTk	1	105	1	A6QQ28	N-Term(iTRAQ8plex); K8(iTRAQ8plex)	1.01823	1		0.904422	1		0.381696	1		0.384409	1		0.599593	1		20.63	3	1436.83	-1.3176	0
vkETMVPk	33	6	1	P11839	N-Term(iTRAQ8plex); K2(iTRAQ8plex); K8(iTRAQ8plex)	0.949262	33	13.7412	0.948443	33	18.5371	1.55423	33	14.5803	1.12717	33	14.3679	1.88799	33	14.2675	20.54	2	1844.14	-2.93349	1
vEISYTPSDGSPk	1	6	1	Q0QEQ3	N-Term(iTRAQ8plex); K13(iTRAQ8plex)	1.57547	1		2.18581	1		0.747167	1		0.800584	1		0.782185	1		20.48	3	1988.07	-5.97974	0
sYLSMVGSccTSPNPTAcFLk	1	2	1	W5PTG9	N-Term(iTRAQ8plex); C9(Carbamidomethyl); C10(Carbamidomethyl); C18(Carbamidomethyl); K21(iTRAQ8plex)	1.0257	1		0.813792	1		1.10399	1		0.978579	1		1.16406	1		20.48	3	2988.46	0.603943	0
tVEAcNLPIVR	1	1	1	W5P812	N-Term(iTRAQ8plex); C5(Carbamidomethyl)	0.873001	1		1.07193	1		1.10899	1		0.737707	1		0.508504	1		20.47	2	1575.88	-0.588637	0
dGGIDPLVR	2	9	1	Q9MZY2	N-Term(iTRAQ8plex)	2.40006	2	69.7679	1.85222	2	49.4048	2.68099	2	34.1031	2.0537	2	16.6628	1.89664	2	10.897	20.37	3	1245.71	1.63501	0
vGQYSGDLR	1	1	1	W5NRH2	N-Term(iTRAQ8plex)	0.848543	1		0.885828	1		0.963309	1		1.34784	1		1.08427	1		20.35	2	1298.7	-1.89696	0
aLETHTYFER	2	2	1	W5NXW9	N-Term(iTRAQ8plex)	0.628066	2	51.118	0.52841	2	19.3372	0.498338	2	29.4571	0.544204	2	50.0245	0.650213	2	35.5656	20.35	3	1570.81	-4.76382	0
aHVETLR	5	4	1	W5NX51	N-Term(iTRAQ8plex)	1.26701	5	7.58379	1.26032	5	10.0201	1.5729	5	9.54998	1.66039	5	21.8027	1.89819	5	17.3529	20.34	3	1129.66	0.566238	0
aQHTDNk	2	4	1	W5PMT0	N-Term(iTRAQ8plex); K7(iTRAQ8plex)	0.883678	2	0.433406	0.58873	2	6.55536	0.619744	2	11.5898	0.708872	2	11.1698	0.802732	2	1.19992	20.32	3	1421.79	-3.2072	0
sPAQTLQWQVLPNxVPAk	6	3	1	D2SZE3	N-Term(iTRAQ8plex); X14(W); K18(iTRAQ8plex)	0.906661	6	12.5473	0.798395	6	5.75814	0.958122	6	25.5099	1.06423	6	22.6935	1.19096	6	17.1627	20.3	4	2671.5	-8.45114	0
fSGSSSGk	6	4	1	A6QM09	N-Term(iTRAQ8plex); K8(iTRAQ8plex)	0.274322	6	20.2834	0.222307	6	24.3086	0.247635	6	17.2686	0.208158	6	12.2596	0.224322	6	22.0574	20.24	2	1364.76	-1.71721	0
eGmNIVEAMER	1	7	1	Q864L8	N-Term(iTRAQ8plex); M3(Oxidation)	1.12079	1		1.12484	1		0.949411	1		0.829997	1		0.8036	1		20.23	2	1598.78	-1.61358	0
xIGGTLPQR	2	6	2	Q06B57;W5Q6U0	N-Term(iTRAQ8plex); X1(A)																20.11	2	1216.73	-3.96073	0
aQYEEIAQR	1	23	3	A5A758;S9WX05;E1B991	N-Term(iTRAQ8plex)																20.1	2	1411.74	-3.00702	0
eLQEMSTEGSk	3	9	1	W5PZI1	N-Term(iTRAQ8plex); K11(iTRAQ8plex)	1.26371	3	1.23534	2.60482	3	12.0814	1.70881	3	30.5644	2.00195	3	41.5887	1.81024	3	47.1644	20.02	2	1846.97	0.466796	0
scQDQPTxMAR	2	1	1	D2SZA9	N-Term(iTRAQ8plex); C2(Carbamidomethyl); X8(N)	0.734932	2	22.4752	0.744697	2	53.8539	1.99807	2	6.69417	1.40573	2	5.4211	1.66265	2	7.55342	19.99	2	1611.74	-5.14554	0
fPQLNETSFANSR	2	7	2	W5Q6U0;Q06B57	N-Term(iTRAQ8plex)																19.99	3	1814.93	-1.63033	0
qHVDPDTTGGNDGYcNLMMQR	1	1	1	W5PTS4	N-Term(iTRAQ8plex); C15(Carbamidomethyl)	1.57469	1		0.801399	1		0.865936	1		0.897698	1		1.10373	1		19.98	3	2713.2	-1.92683	0
lEGTPQcSLR	1	3	1	W5PSD8	N-Term(iTRAQ8plex); C7(Carbamidomethyl)	1.26245	1		1.21577	1		1.30271	1		1.14715	1		1.04662	1		19.93	2	1464.78	0.333717	0
eIPLSPMGEDSASGDIETLHSk	2	11	1	Q2TJL6	N-Term(iTRAQ8plex); K22(iTRAQ8plex)	0.898196	2	6.36255	0.682278	2	4.03489	0.938178	2	11.7391	1.08235	2	22.2266	0.951018	2	27.274	19.93	3	2921.51	2.68515	0
amkPWTQPk	4	17	3	E7BQS5;P04654;E7BQS3	N-Term(iTRAQ8plex); M2(Oxidation); K3(iTRAQ8plex); K9(iTRAQ8plex)																19.83	2	2015.18	-4.5882	0
wYTVGVAGNAIk	3	3	1	W5PMH6	N-Term(iTRAQ8plex); K12(iTRAQ8plex)	2.18588	3	3.01607	1.85739	3	19.2629	1.76254	3	1.28158	1.8601	3	4.99478	1.81746	3	7.77655	19.82	3	1887.1	1.13811	0
vGITSINk	2	1	1	W5Q124	N-Term(iTRAQ8plex); K8(iTRAQ8plex)	1.6513	2	10.5163	1.904	2	0.828812	1.73704	2	2.65176	1.25783	2	4.04728	1.18546	2	13.5975	19.75	2	1439.9	-0.833111	0
eYTDASFSNQk	1	8	1	Q9XT27	N-Term(iTRAQ8plex); K11(iTRAQ8plex)	1.1046	1		1.03908	1		1.42155	1		1.15822	1		1.0326	1		19.69	2	1897.98	2.29111	0
vPAHAVVVR	1	4	1	E1BG25	N-Term(iTRAQ8plex)	0.396517	1		0.952443	1		1.15191	1		0.435011	1		0.721121	1		19.66	3	1251.78	-1.59475	0
qFQFIQVAGRSGDk	4	5	1	Q95114	N-Term(iTRAQ8plex); K14(iTRAQ8plex)	0.940726	4	11.5307	0.957138	4	15.4349	0.754046	4	9.11181	0.922074	4	2.90992	0.946277	4	10.3587	19.65	3	2189.23	2.16164	1
vYPTVNcQSPGR	1	2	1	W5QH45	N-Term(iTRAQ8plex); C7(Carbamidomethyl)	1.3228	1		1.58255	1		1.59088	1		1.65072	1		1.04189	1		19.6	2	1681.86	-0.239414	0
eYFYSPDPLYk	1	1	1	W5PZD0	N-Term(iTRAQ8plex); K11(iTRAQ8plex)	0.998804	1		1.094	1		1.2564	1		1.23141	1		1.23869	1		19.49	3	2030.06	-8.75311	0
sDAQPSVFLFkPSEEQLR	2	1	1	W5QHZ5	N-Term(iTRAQ8plex); K11(iTRAQ8plex)	0.133509	2	33.9063	0.0981816	2	44.6195	0.111562	2	67.1245	0.158033	2	40.6017	0.110986	2	50.0819	19.49	3	2686.47	0.267909	0
fTTLcVTcVPENckPWSLR	2	5	1	W5PMT0	N-Term(iTRAQ8plex); C5(Carbamidomethyl); C8(Carbamidomethyl); C13(Carbamidomethyl); K14(iTRAQ8plex)	0.836614	2	15.8312	0.692587	2	25.9172	0.520265	2	13.9189	0.436309	2	20.6839	0.472675	2	18.9031	19.45	4	2976.53	-3.25741	0
iTVDDkHYQk	12	17	3	E7BQS5;P04654;E7BQS3	N-Term(iTRAQ8plex); K6(iTRAQ8plex); K10(iTRAQ8plex)																19.39	2	2159.26	-1.53877	1
lVPIIcR	2	4	2	W5PNP1;G5CC03	N-Term(iTRAQ8plex); C6(Carbamidomethyl)																19.23	3	1174.73	-0.838655	0
mAADcAQELR	1	3	1	L8HQV0	N-Term(iTRAQ8plex); C5(Carbamidomethyl)	1.21945	1		0.571796	1		0.585263	1		0.563801	1		0.548843	1		19.23	2	1468.72	-1.40855	0
hVVPNEVVVQR	1	7	1	T0MIA6	N-Term(iTRAQ8plex)	1.80579	1		2.25169	1		1.94414	1		1.92199	1		1.65357	1		19.21	3	1579.92	-0.345769	0
dPSGFSPEVQk	1	5	1	L8IXF1	N-Term(iTRAQ8plex); K11(iTRAQ8plex)	1.10255	1		2.04806	1		1.64039	1		1.43936	1		1.55406	1		19.11	3	1798.98	-1.65352	0
sPAQTLQWQVLPNxVPAk	2	3	1	D2SZE3	N-Term(iTRAQ8plex); X14(V); K18(iTRAQ8plex)	1.21869	2	16.2363	1.07001	2	4.69803	1.23698	2	34.1321	1.36165	2	1.76952	1.5674	2	2.70346	19.1	5	2584.46	-17.0872	0
iSGLIYEETR	1	37	1	Q6B826	N-Term(iTRAQ8plex)	1.64667	1		1.28065	1		0.711653	1		0.77016	1		0.85627	1		18.98	2	1484.82	-3.70751	0
vLPScDLAR	1	5	1	L8HQV0	N-Term(iTRAQ8plex); C5(Carbamidomethyl)	1.13971	1		0.627303	1		0.650102	1		0.688085	1		0.637702	1		18.96	2	1334.74	-1.5557	0
sAPSVTLFPPSkEELDTNk	16	1	1	W5PSQ7	N-Term(iTRAQ8plex); K12(iTRAQ8plex); K19(iTRAQ8plex)	0.425695	16	17.0988	0.327917	16	13.3434	0.444685	16	14.4029	0.446313	16	16.3829	0.616139	16	27.1775	18.95	4	2972.67	-0.822706	1
ccAADDkEGcFVLEGPk	2	2	1	P14639	N-Term(iTRAQ8plex); C1(Carbamidomethyl); C2(Carbamidomethyl); K7(iTRAQ8plex); C10(Carbamidomethyl); K17(iTRAQ8plex)	1.00431	2	1.70927	0.980563	2	9.78247	1.18442	2	28.1277	1.18028	2	18.8685	1.088	2	18.0158	18.87	4	2868.43	-5.05091	1
gAQGVILVYDVTR	1	3	1	L8IW82	N-Term(iTRAQ8plex)	1.23137	1		1.22623	1		1.79903	1		2.42479	1		3.11814	1		18.66	2	1694.97	-3.325	0
dAAGGPGAPADPGRPAGHSGSSk	2	1	1	W5P9V5	N-Term(iTRAQ8plex); K23(iTRAQ8plex)	1.10928	2	19.9637	0.810702	2	10.3781	1.16731	2	19.4868	1.58572	2	14.4707	1.65642	2	12.4394	18.57	4	2625.35	-4.19302	0
aTEAGLk	1	6	0		N-Term(iTRAQ8plex); K7(iTRAQ8plex)																18.31	2	1297.79	-0.0667826	0
sPAQTLQWQVLPNxVPAk	1	3	1	D2SZE3	N-Term(iTRAQ8plex); X14(R); K18(iTRAQ8plex)	0.938459	1		0.810684	1		1.0194	1		1.16203	1		1.50982	1		18.27	3	2641.51	-12.266	1
sPAQTLQWQVLPNxVPAk	2	3	1	D2SZE3	N-Term(iTRAQ8plex); X14(N); K18(iTRAQ8plex)	0.990392	2	22.3897	0.781148	2	30.32	1.10494	2	71.4331	1.07526	2	43.1981	1.12415	2	57.2251	18.26	3	2599.48	-2.47643	0
yLYEVAR	8	4	2	P14639;X2GM95	N-Term(iTRAQ8plex)																18.21	2	1217.68	-2.92217	0
nEcFLNHkDDSPDLPk	4	2	1	P14639	N-Term(iTRAQ8plex); C3(Carbamidomethyl); K8(iTRAQ8plex); K16(iTRAQ8plex)	0.99373	4	3.66357	1.01223	4	3.44061	1.87352	4	20.9818	1.09042	4	10.1638	1.17199	4	17.9001	18.21	4	2841.48	-5.11873	1
sPAQTLQWxVLPNTVPAk	5	2	1	A0SWQ7	N-Term(iTRAQ8plex); X9(N); K18(iTRAQ8plex)	1.18385	4	42.4883	0.950113	4	4.25453	1.17631	4	7.11049	1.29861	4	7.44748	1.24847	4	16.1686	18.2	4	2572.46	-5.10368	0
vEEQGSQLR	2	5	2	Q7M2U8;P0DML7	N-Term(iTRAQ8plex)																18.16	2	1349.73	-2.50099	0
sPALGAANR	1	7	1	Q9MZY2	N-Term(iTRAQ8plex)	1.97596	1		1.82803	1		3.49179	1		1.69172	1		2.08862	1		18.15	2	1160.66	-5.2228	0
dGDAcQSR	1	3	1	M5FJT7	N-Term(iTRAQ8plex); C5(Carbamidomethyl)	0.918635	1		0.668201	1		0.877947	1		0.894759	1		0.872011	1		18.07	2	1212.56	-1.9493	0
sPAQTLQWxVLPNTVPAk	10	2	1	A0SWQ7	N-Term(iTRAQ8plex); X9(M); K18(iTRAQ8plex)	0.912648	10	15.9907	0.933437	10	13.6334	0.981759	10	18.5063	1.09831	10	11.4328	1.14506	10	22.5967	18.06	3	2589.46	-3.25444	0
eNLQFSAALR	1	16	1	Q4GZT4	N-Term(iTRAQ8plex)	1.41614	1		1.05715	1		0.850193	1		0.770068	1		0.959496	1		18.04	2	1452.81	0.465268	0
eTTLAANQFLAYASR	1	1	1	W5PS45	N-Term(iTRAQ8plex)	1.12348	1		0.941037	1		1.14738	1		1.17623	1		1.48636	1		17.92	2	1960.04	-3.45921	0
ecVPNSNER	1	7	1	W5PF65	N-Term(iTRAQ8plex); C2(Carbamidomethyl)	0.869184	1		1.14777	1		1.29689	1		0.809553	1		0.596948	1		17.84	2	1408.68	-1.91245	0
lSQETEALGR	1	6	1	F1RIP6	N-Term(iTRAQ8plex)	0.683596	1		0.50981	1		0.543016	1		0.646238	1		1.10235	1		17.74	2	1407.77	-4.21874	0
nLEENYcR	2	7	1	W5P3R3	N-Term(iTRAQ8plex); C7(Carbamidomethyl)	0.997797	2	16.1877	0.918489	2	13.4024	1.17793	2	7.32149	0.890551	2	2.75146	0.883517	2	1.76072	17.72	2	1401.67	-2.81386	0
lNPHWDGEk	2	4	1	Q9MZY2	N-Term(iTRAQ8plex); K9(iTRAQ8plex)	1.08505	2	40.2905	1.13679	2	35.033	1.50644	2	47.6003	1.34322	2	47.7498	1.35915	2	48.9519	17.72	3	1703.92	-4.59793	0
vSPVTVTALGGGDLELR	1	1	1	W5P559	N-Term(iTRAQ8plex)	1.53048	1		1.17289	1		1.04205	1		2.47075	1		1.4601	1		17.54	2	1988.13	-1.7439	0
lcTTScEEVIR	1	1	1	E7BQS3	N-Term(iTRAQ8plex); C2(Carbamidomethyl); C6(Carbamidomethyl)	1.6764	1		1.58177	1		0.584366	1		1.04088	1		0.702198	1		17.51	2	1671.83	-1.61526	0
vLVLNTDYk	3	1	1	Q8MHZ7	N-Term(iTRAQ8plex); K9(iTRAQ8plex)	1.01178	3	18.6045	0.960192	3	90.6339	0.90723	3	66.3014	1.67601	3	25.3057	1.51823	3	29.7683	17.34	3	1673	-3.84187	0
aTFDAISk	1	8	1	S9X1J5	N-Term(iTRAQ8plex); K8(iTRAQ8plex)	0.352462	1		0.506768	1		0.336172	1		0.265867	1		0.206738	1		17.33	2	1460.85	-3.88637	0
dMNYVSPIIR	1	1	1	W5P6F4	N-Term(iTRAQ8plex)	1.15747	1		0.901558	1		0.978151	1		0.83976	1		0.597297	1		17.27	2	1511.81	-5.08542	0
vVLVLAGR	1	5	1	L8IVX5	N-Term(iTRAQ8plex)	0.470332	1		0.95845	1		0.49454	1		0.377272	1		0.436202	1		17.23	2	1130.75	-1.97689	0
dYFMPcPNR	2	1	1	W5QAB1	N-Term(iTRAQ8plex); C6(Carbamidomethyl)	0.918011	2	1.70274	0.749951	2	2.38688	0.933141	2	5.5601	0.641473	2	4.54199	0.608885	2	3.40892	16.92	2	1503.7	1.08793	0
iDQDELSk	3	1	1	W5P737	N-Term(iTRAQ8plex); K8(iTRAQ8plex)	1.35113	3	1.54162	1.20967	3	7.17617	1.74009	3	13.8485	2.20483	3	21.1284	2.50918	3	24.8984	16.74	2	1555.87	-2.4782	0
hTVQTENR	2	3	1	F1SIM7	N-Term(iTRAQ8plex)	0.948292	2	86.8108	1.02786	2	249.59	0.855955	2	69.0014	0.894573	2	41.8914	1.05949	2	81.5552	16.69	3	1288.69	-3.82554	0
dTGLGLSPTASLR	1	6	1	W5NSA6	N-Term(iTRAQ8plex)	1.02596	1		1.2318	1		0.911595	1		1.58612	1		1.54617	1		16.68	2	1591.89	-4.32804	0
nPEPELLVR	1	8	1	W5Q302	N-Term(iTRAQ8plex)	1.22393	1		0.883513	1		1.5016	1		1.50536	1		1.80233	1		16.53	2	1370.79	-0.6745	0
lEDcSPQR	1	2	1	Q32KU6	N-Term(iTRAQ8plex); C4(Carbamidomethyl)	0.639497	1		0.667666	1		0.703176	1		0.896042	1		0.770579	1		16.43	2	1308.65	-2.85359	0
sEDLYLYLGER	1	5	1	Q9XT27	N-Term(iTRAQ8plex)	0.961619	1		0.897847	1		1.05099	1		0.705557	1		0.655572	1		16.36	2	1661.87	-0.513747	0
vLPSATLEAEQPR	1	5	1	A3KLR9	N-Term(iTRAQ8plex)	2.66895	1		1.90558	1		1.83158	1		2.2494	1		2.09324	1		16.29	2	1714.96	-0.707348	0
vVIAcEGNPEVPVHFDk	2	6	1	W5PTS4	N-Term(iTRAQ8plex); C5(Carbamidomethyl); K17(iTRAQ8plex)	1.40068	2	11.5042	0.932713	2	8.864	1.25972	2	44.2347	1.0772	2	9.85706	1.30759	2	16.5279	16.28	4	2518.35	-2.20355	0
dVScVNPPQVENAIIQNQk	1	2	1	D6PZY4	N-Term(iTRAQ8plex); C4(Carbamidomethyl); K19(iTRAQ8plex)	1.36666	1		0.994464	1		1.2724	1		1.10071	1		1.25178	1		16.19	3	2761.46	-5.57084	0
lYDDRNEPVLR	1	5	1	W5PY10	N-Term(iTRAQ8plex)	2.15047	1		2.05517	1		2.24961	1		1.87371	1		2.25042	1		16.05	3	1693.92	0.500504	1
sSELVSANR	1	9	1	Q7M364	N-Term(iTRAQ8plex)	1.44897	1		1.5417	1		2.11486	1		1.69569	1		1.96049	1		15.91	2	1266.69	-3.62025	0
gAEEQLVPR	1	2	1	Q2KJF1	N-Term(iTRAQ8plex)	0.930343	1		1.12151	1		1.14007	1		0.95932	1		1.08571	1		15.88	2	1302.73	0.959978	0
tITGDcNNR	5	9	1	Q9MZY2	N-Term(iTRAQ8plex); C6(Carbamidomethyl)	1.45224	5	37.5077	2.45982	5	46.3875	2.36188	5	34.1769	1.64977	5	52.3479	1.59723	5	35.7453	15.81	2	1354.67	-0.583923	0
tSGLITcLk	2	4	1	D6PZY4	N-Term(iTRAQ8plex); C7(Carbamidomethyl); K9(iTRAQ8plex)	0.920412	2	10.3148	1.49947	2	34.5768	1.66651	2	30.7124	1.41508	2	31.1688	0.951198	2	3.8825	15.77	3	1600.95	-1.19494	0
gTVTDFPGFNER	1	1	1	W5PZM9	N-Term(iTRAQ8plex)	0.733596	1		0.929634	1		0.734375	1		0.319704	1		0.355742	1		15.72	2	1643.83	-3.23934	0
wcAISPPEGSk	1	5	1	D3G9G3	N-Term(iTRAQ8plex); C2(Carbamidomethyl); K11(iTRAQ8plex)	1.02363	1		1.77819	1		0.603363	1		0.683139	1		0.749975	1		15.69	3	1839.98	-4.57163	0
iWckDDQNPHSR	2	3	1	P00712	N-Term(iTRAQ8plex); C3(Carbamidomethyl); K4(iTRAQ8plex)	0.38597	2	12.8051	0.339385	2	6.1195	0.370023	2	7.23453	0.259747	2	2.54406	0.280296	2	21.7197	15.63	4	2164.11	-2.14195	1
eGTTAELVk	2	1	1	W5P0U4	N-Term(iTRAQ8plex); K9(iTRAQ8plex)	1.29409	2	11.7994	0.871625	2	10.275	1.11447	2	12.7661	1.43389	2	5.31857	1.54971	2	11.2189	15.47	2	1555.91	-3.82028	0
dTQSIIFLGR	1	1	1	W5NXP3	N-Term(iTRAQ8plex)	0.972852	1		1.21398	1		1.04525	1		0.572896	1		1.17758	1		15.22	2	1453.83	-4.07897	0
hPHPHLSFmAIPPk	12	147	10	P02669;D2SZE0;D2SZC1;D2SZE3;D2SZA9;P50420;A0SWQ7;Q5C9G9;Q6YLM3;B6CXY7	N-Term(iTRAQ8plex); M9(Oxidation); K14(iTRAQ8plex)																14.99	5	2233.25	-2.49495	0
gVLFASGQNLAR	1	5	1	I3LD43	N-Term(iTRAQ8plex)	1.14768	1		1.07996	1		0.610651	1		0.48577	1		0.594769	1		14.86	2	1536.88	-2.68025	0
tEDTIEFTcR	1	1	1	B5B304	N-Term(iTRAQ8plex); C9(Carbamidomethyl)	1.39519	1		0.655809	1		0.940943	1		0.75137	1		0.659975	1		14.85	2	1575.76	-3.66285	0
sAVEDEGLk	1	33	1	K8FK38	N-Term(iTRAQ8plex); K9(iTRAQ8plex)	0.734287	1		1.08733	1		0.793013	1		0.799502	1		0.565568	1		14.83	2	1555.88	-1.54314	0
qDGSVDFGR	1	9	1	A6QPX7	N-Term(iTRAQ8plex)	1.70379	1		1.72266	1		1.54389	1		1.31495	1		1.29107	1		14.82	2	1284.65	-2.37878	0
yYTYMIMNk	1	5	2	W5NRI1;Q2UVX4	N-Term(iTRAQ8plex); K9(iTRAQ8plex)																14.79	3	1834.96	-4.43531	0
scQDQPTxMAR	2	1	1	D2SZA9	N-Term(iTRAQ8plex); C2(Carbamidomethyl); X8(E)	1.30119	2	3.66756	1.11809	2	2.97333	1.44061	2	5.47697	1.72797	2	7.30061	1.93638	2	8.36339	14.72	2	1626.75	0.6577	0
eNAALVAR	1	4	1	F1MX50	N-Term(iTRAQ8plex)	1.52836	1		1.34049	1		1.09256	1		1.07758	1		1.13281	1		14.7	2	1147.67	-3.78347	0
gEAGEmELFVSTQNAmk	2	1	1	S9Y4T1	N-Term(iTRAQ8plex); M6(Oxidation); M16(Oxidation); K17(iTRAQ8plex)	0.916741	2	11.6736	1.44213	2	15.7395	1.21232	2	6.61446	1.15469	2	4.3068	1.0173	2	2.7868	14.64	3	2482.21	-10.8611	0
sPAQTxQWQVLPNAVPAk	7	1	1	D2SZC1	N-Term(iTRAQ8plex); X6(Y); K18(iTRAQ8plex)	0.638466	7	28.5559	0.517765	7	54.9629	0.995563	7	22.0225	2.09212	7	34.0108	2.60795	7	25.7928	14.62	2	2606.45	-3.74886	0
aMkPWTQPk	56	17	3	E7BQS5;P04654;E7BQS3	N-Term(iTRAQ8plex); K3(iTRAQ8plex); K9(iTRAQ8plex)																14.54	3	1999.19	-1.3134	0
tQIEQTNEER	6	4	1	W5PZI1	N-Term(iTRAQ8plex)	1.00323	6	14.7161	2.85893	6	8.00142	0.712465	6	1.37874	0.493418	6	7.97485	0.382803	6	14.9911	14.52	2	1551.79	-3.44043	0
vSLSATGFYR	3	3	1	W5PMT0	N-Term(iTRAQ8plex)	0.965287	3	10.0908	0.797085	3	6.18017	0.807135	3	9.13005	0.980946	3	2.04676	1.04711	3	2.32138	14.41	2	1404.78	-0.799942	0
yAFQEALNSAGEk	2	5	1	A5J2A8	N-Term(iTRAQ8plex); K13(iTRAQ8plex)	1.04074	2	27.4656	1.27852	2	29.631	1.16962	2	39.4471	1.44408	2	36.4499	1.2669	2	42.4418	14.41	3	2036.09	-2.45603	0
dPLTITVR	1	5	2	W5NRI1;Q2UVX4	N-Term(iTRAQ8plex)																14.26	2	1218.74	-0.0606017	0
tVIYGTSSR	1	1	1	L8HLN2	N-Term(iTRAQ8plex)	0.623068	1		0.330856	1		0.372507	1		0.230634	1		0.388528	1		14.18	2	1287.71	-5.04472	0
qVYGVYTk	2	8	1	F1MVS9	N-Term(iTRAQ8plex); K8(iTRAQ8plex)	0.955888	2	1.1356	1.14968	2	4.76627	1.05171	2	20.6024	0.931537	2	24.4073	1.14619	2	27.681	14.13	3	1565.91	-1.69793	0
aYQQALcR	6	13	2	A6ZE99;L8I632	N-Term(iTRAQ8plex); C7(Carbamidomethyl)																14.1	2	1313.69	-1.01613	0
aLTEDVYQPR	1	1	1	W5NSA6	N-Term(iTRAQ8plex)	1.244	1		1.05082	1		0.927062	1		0.755341	1		0.860268	1		14.1	2	1495.8	-2.1202	0
nIcxIScDk	1	2	1	Q69B46	N-Term(iTRAQ8plex); C3(Carbamidomethyl); X4(W); C7(Carbamidomethyl); K9(iTRAQ8plex)	1.09456	1		1.03893	1		1.23482	1		1.75202	1		1.40041	1		14.07	3	1803.92	-6.51404	0
eccDkPVLEk	3	3	1	P14639	N-Term(iTRAQ8plex); C2(Carbamidomethyl); C3(Carbamidomethyl); K5(iTRAQ8plex); K10(iTRAQ8plex)	1.09046	3	3.96033	1.35426	3	40.0824	2.76298	3	28.4637	2.66128	3	35.2385	2.48149	3	21.4242	14.01	2	2190.19	-3.8535	0
lLVVYPWTzR	2	65	2	P02080;P02075	N-Term(iTRAQ8plex); Z9(Q)																14.01	2	1578.93	-1.40143	0
sPAQTLQWxVLPNTVPAk	1	2	1	A0SWQ7	N-Term(iTRAQ8plex); X9(Y); K18(iTRAQ8plex)	0.856933	1		1.10617	1		1.15104	1		0.943706	1		1.10973	1		13.99	3	2621.47	-7.9151	0
yTPVEAIEk	1	3	1	W5PID9	N-Term(iTRAQ8plex); K9(iTRAQ8plex)	1.57517	1		1.74829	1		2.5125	1		2.81942	1		2.54166	1		13.72	3	1657.96	-1.64453	0
yAASSYLSLTSTDWk	4	1	1	L8IAF4	N-Term(iTRAQ8plex); K15(iTRAQ8plex)	0.61549	4	14.1816	0.600401	4	6.36508	0.59007	4	7.69222	0.563679	4	9.54895	0.627483	4	14.7072	13.71	3	2301.22	-3.11977	0
hYAHTDcPGHADYVk	1	5	1	W5NWF7	N-Term(iTRAQ8plex); C7(Carbamidomethyl); K15(iTRAQ8plex)	1.41256	1		1.47979	1		1.27247	1		1.85062	1		1.92128	1		13.69	4	2379.19	7.23889	0
eYEATLEEccAk	1	4	1	P02769	N-Term(iTRAQ8plex); C9(Carbamidomethyl); C10(Carbamidomethyl); K12(iTRAQ8plex)	0.967735	1		1.65191	1		0.793787	1		0.849332	1		1.09996	1		13.67	3	2111.02	-2.07177	0
vMPIcLPSk	1	15	2	W5P0Q4;B6D985	N-Term(iTRAQ8plex); C5(Carbamidomethyl); K9(iTRAQ8plex)																13.45	3	1652.96	-5.63141	0
hPHPHLSFMAIPPk	17	147	10	P02669;D2SZE0;D2SZC1;D2SZE3;D2SZA9;P50420;A0SWQ7;Q5C9G9;Q6YLM3;B6CXY7	N-Term(iTRAQ8plex); K14(iTRAQ8plex)																13.45	5	2217.25	-1.46175	0
cGLGISSR	2	9	2	W5P9V5;A6QNW3	N-Term(iTRAQ8plex); C1(Carbamidomethyl)																13.43	2	1153.63	-1.11259	0
aGLYGLPR	1	11	2	W5Q6U0;Q06B57	N-Term(iTRAQ8plex)																13.25	2	1150.68	-3.25828	0
gSmILDIcTk	1	6	2	W5NPK5;Q2UVX4	N-Term(iTRAQ8plex); M3(Oxidation); C8(Carbamidomethyl); K10(iTRAQ8plex)																13.22	2	1761.97	0.11355	0
aVDPTVSk	2	2	1	W5PZJ1	N-Term(iTRAQ8plex); K8(iTRAQ8plex)	1.04672	2	0.873375	1.80465	2	61.2238	1.37697	2	19.7648	2.866	2	10.9872	3.75216	2	5.98269	12.95	3	1424.85	-5.23626	0
eEELYAcQR	1	3	1	Q2F7Z7	N-Term(iTRAQ8plex); C7(Carbamidomethyl)	0.637173	1		1.12145	1		1.1322	1		1.59534	1		0.978533	1		12.81	2	1501.73	0.983681	0
aLWTGALTPGR	1	2	1	Q2KJF1	N-Term(iTRAQ8plex)	0.896272	1		0.871781	1		1.23009	1		0.690249	1		0.862935	1		12.62	2	1446.84	0.332251	0
vTVEVIPR	1	3	1	C8BKD1	N-Term(iTRAQ8plex)	0.758172	1		0.586502	1		0.774052	1		0.688975	1		0.53626	1		12.56	2	1216.76	-0.0508765	0
ccAkPESER	3	3	1	P14639	N-Term(iTRAQ8plex); C1(Carbamidomethyl); C2(Carbamidomethyl); K4(iTRAQ8plex)	1.00082	3	7.03897	1.25794	3	1.54683	1.61606	3	0.799853	1.25548	3	3.32658	1.28148	3	3.19318	12.54	2	1744.88	-6.69618	0
tPIVGQPSVPGGPVHLcPGR	1	3	1	L8HQH4	N-Term(iTRAQ8plex); C17(Carbamidomethyl)	1.05305	1		1.17998	1		1.12978	1		1.24079	1		1.26685	1		12.35	4	2329.28	0.831625	0
fAAATGATPIAGR	1	10	1	Q29231	N-Term(iTRAQ8plex)	1.30979	1		1.36799	1		0.805854	1		0.651419	1		0.722794	1		12.08	2	1507.85	-3.91255	0
gEAGEMELFVSTQNAmk	1	1	1	S9Y4T1	N-Term(iTRAQ8plex); M16(Oxidation); K17(iTRAQ8plex)	0.846527	1		0.749016	1		0.693702	1		0.870259	1		0.857262	1		11.97	3	2466.22	-10.5928	0
yLETDPANR	2	8	1	T0MIA6	N-Term(iTRAQ8plex)	1.91543	1		0.852865	1		1.12849	1		1.01521	1		1.1033	1		11.92	2	1382.72	-1.17227	0
cGLVPVMAENR	1	8	1	D3G9G3	N-Term(iTRAQ8plex); C1(Carbamidomethyl)	1.03742	1		1.68894	1		0.57921	1		0.786126	1		0.680219	1		11.91	2	1549.81	-2.51743	0
gFSSGSAVVSGGSR	1	2	1	S9WX05	N-Term(iTRAQ8plex)	1.23547	1		0.949257	1		1.35123	1		1.82329	1		2.48353	1		11.67	2	1558.81	-2.31053	0
fDSWPcVMGR	1	5	1	W5NPT7	N-Term(iTRAQ8plex); C6(Carbamidomethyl)	1.10401	1		1.03963	1		1.20197	1		1.15194	1		1.2581	1		11.58	2	1558.74	-0.819524	0
hPHPHLAFmAIPPk	5	1	1	Q9N258	N-Term(iTRAQ8plex); M9(Oxidation); K14(iTRAQ8plex)	1.35384	2	5.77904	1.32143	2	45.4699	1.63945	2	53.0732	2.52054	2	114.903	2.48829	2	105.516	11.44	4	2217.26	-0.700933	0
yEELQITAGR	1	1	1	S9WX05	N-Term(iTRAQ8plex)	1.08584	1		0.976043	1		1.03393	1		1.05209	1		1.40446	1		11.35	2	1483.79	-8.9657	0
dVAmkPPSVYVLPPTR	2	1	1	W5NXW9	N-Term(iTRAQ8plex); M4(Oxidation); K5(iTRAQ8plex)	0.654034	2	20.433	0.65187	2	26.1169	0.404363	2	5.63624	0.387591	2	40.3751	0.448684	2	20.0306	11.1	3	2394.37	-1.04031	0
sPAQTLQWQVLPNxVPAk	2	3	1	D2SZE3	N-Term(iTRAQ8plex); X14(F); K18(iTRAQ8plex)	1.21051	2	3.46159	2.22593	2	7.91197	1.20655	2	8.14641	1.38418	2	13.043	2.01453	2	6.36225	11.1	3	2632.49	-6.21596	0
eLQQAVLQMEQR	1	6	1	F1RIP6	N-Term(iTRAQ8plex)	1.1507	1		1.23286	1		0.944244	1		0.985747	1		0.809569	1		10.92	2	1776.94	-9.94186	0
dLDLQSNHPmPETk	1	1	1	W5PNC9	N-Term(iTRAQ8plex); M10(Oxidation); K14(iTRAQ8plex)	2.24851	1		1.85677	1		2.67776	1		4.66082	1		4.68239	1		10.8	3	2249.16	-4.57353	0
tkLTEEEk	3	10	3	E7BQS5;P04654;E7BQS3	N-Term(iTRAQ8plex); K2(iTRAQ8plex); K8(iTRAQ8plex)																10.66	4	1890.13	-2.24299	1
nIcxIScDk	3	2	1	Q69B46	N-Term(iTRAQ8plex); C3(Carbamidomethyl); X4(Q); C7(Carbamidomethyl); K9(iTRAQ8plex)	1.66407	3	0.759597	1.58461	3	43.5417	2.89022	3	29.2399	1.51986	3	46.1842	1.13193	3	3.61681	10.64	3	1745.91	-3.52112	0
fVPPGSTk	2	1	1	W5P0U4	N-Term(iTRAQ8plex); K8(iTRAQ8plex)	1.26629	2	9.6465	1.12731	2	33.1527	1.24046	2	36.5026	1.47042	2	17.7556	1.40544	2	27.6913	10.56	3	1440.86	-3.82785	0
vPGTSASATLTGLTR	1	15	1	B8Y9T0	N-Term(iTRAQ8plex)	0.997538	1		0.920297	1		0.945981	1		1.16451	1		0.840414	1		10.56	2	1735.98	-2.93491	0
vTEGGEPYR	1	5	1	W5Q302	N-Term(iTRAQ8plex)	0.916588	1		0.812805	1		0.945179	1		1.10076	1		1.47349	1		10.41	2	1311.68	-1.51448	0
iAxYIPIQYVLSR	1	3	1	D2SZE0	N-Term(iTRAQ8plex); X3(H)	1.11655	1		1.25766	1		1.74555	1		1.46853	1		1.41745	1		10.35	3	1877.07	-15.9033	0
tQGLVGTESLR	1	5	1	S9WBE6	N-Term(iTRAQ8plex)	1.64622	1		1.03521	1		1.04996	1		1.27913	1		1.43138	1		10.28	2	1464.83	-2.54666	0
lTEEEkNHLNFLk	4	1	1	E7BQS5	N-Term(iTRAQ8plex); K6(iTRAQ8plex); K13(iTRAQ8plex)	1.42457	4	2.45042	1.47337	4	8.74899	1.48806	4	16.5211	1.73086	4	10.574	1.30117	4	13.7628	10.27	4	2527.45	-5.8919	1
dSTLIMQLLR	2	46	2	Q3SZI4;L8J3H9	N-Term(iTRAQ8plex)																10.26	2	1493.86	-2.91541	0
sPAQTLQWQVLPNxVPAk	1	3	1	D2SZE3	N-Term(iTRAQ8plex); X14(G); K18(iTRAQ8plex)	1.44206	1		0.834909	1		0.992003	1		1.12267	1		1.07085	1		10.25	3	2542.44	-9.07136	0
kNcELFEk	4	3	1	P14639	N-Term(iTRAQ8plex); K1(iTRAQ8plex); C3(Carbamidomethyl); K8(iTRAQ8plex)	0.770127	4	4.85596	0.965146	4	11.8538	1.43641	4	10.029	0.949781	4	11.6809	1.02664	4	11.4619	10.2	3	1980.13	-0.385211	1
dScmGTLVVk	1	5	2	W5NRI1;Q2UVX4	N-Term(iTRAQ8plex); C3(Carbamidomethyl); M4(Oxidation); K10(iTRAQ8plex)																10.04	3	1733.94	-0.954743	0
eLSDQIQR	1	6	1	L8IBW5	N-Term(iTRAQ8plex)	0.845387	1		1.07744	1		0.808068	1		0.794559	1		0.895461	1		9.87	2	1292.71	-2.71686	0
yESELFLR	2	2	1	W5PMT0	N-Term(iTRAQ8plex)	1.01856	2	0.105784	0.90823	2	5.38865	0.775813	2	2.35286	1.12331	2	5.35081	0.741776	2	8.5227	9.73	2	1360.74	-4.34329	0
gQQDVEGYR	1	2	1	W5NUX8	N-Term(iTRAQ8plex)	1.30755	1		1.99534	1		1.76442	1		1.46148	1		1.20471	1		9.61	2	1355.69	0.183955	0
aVVGVVAGGGR	1	11	1	K7GQ66	N-Term(iTRAQ8plex)	0.918851	1		0.829461	1		0.509582	1		0.436026	1		0.564695	1		9.57	2	1245.76	-2.07146	0
dTQSIIFLGk	2	21	4	W5Q0X5;W5Q124;W5PHI7;L8IM56	N-Term(iTRAQ8plex); K10(iTRAQ8plex)																9.49	3	1730.03	-2.05455	0
tcRPEEEcR	1	5	1	W5PSD8	N-Term(iTRAQ8plex); C2(Carbamidomethyl); C8(Carbamidomethyl)	1.41115	1		2.36736	1		0.768226	1		0.733345	1		0.813601	1		9.29	3	1540.71	-3.96106	0
yNGVFQEccQAEDk	1	7	2	P14639;P02769	N-Term(iTRAQ8plex); C8(Carbamidomethyl); C9(Carbamidomethyl); K14(iTRAQ8plex)																8.74	3	2356.09	-10.7296	0
eQLSTSEENSkk	5	17	3	E7BQS5;P04654;E7BQS3	N-Term(iTRAQ8plex); K11(iTRAQ8plex); K12(iTRAQ8plex)																8.41	3	2292.26	-7.01689	1
hkEMxFPk	4	38	6	P11839;Q9TSI0;D7NJ85;J9UHS4;Q155X5;Q6UN62	N-Term(iTRAQ8plex); K2(iTRAQ8plex); X5(P); K8(iTRAQ8plex)																8.11	4	1926.14	-0.274314	1
eLAEDGYSGVEVR	1	7	1	Q862D8	N-Term(iTRAQ8plex)	0.673978	1		0.50605	1		0.320184	1		0.448431	1		0.338218	1		7.68	2	1727.86	-8.88865	0
aMVQQLDALR	1	1	1	W5NWM2	N-Term(iTRAQ8plex)	0.755154	1		0.844575	1		2.39765	1		1.09955	1		0.903023	1		7.56	2	1448.82	-1.67237	0
lPELVDFR	1	2	1	W5PCL4	N-Term(iTRAQ8plex)	0.923199	1		0.731442	1		0.778649	1		1.55839	1		1.41363	1		7.5	2	1292.75	-1.68946	0
sNDAYQSR	2	4	1	K4P494	N-Term(iTRAQ8plex)	0.639402	2	27.3367	0.848316	2	21.8421	0.901137	2	23.8752	0.945527	2	36.7407	1.16233	2	25.7303	7.33	2	1244.62	-0.919829	0
eVDPAHPALR	1	1	1	W5PE92	N-Term(iTRAQ8plex)	1.50891	1		1.76125	1		1.42007	1		1.5788	1		1.87145	1		7.23	3	1408.79	0.0770769	0
kNVHNANQk	1	18	2	A6ZE99;L8I632	N-Term(iTRAQ8plex); K1(iTRAQ8plex); K9(iTRAQ8plex)																7.15	4	1965.17	-4.34891	1
sLGVGFATR	4	10	1	C0LSL0	N-Term(iTRAQ8plex)	0.94894	2	11.4591	1.15063	2	6.39166	1.10404	2	2.73901	1.08122	2	2.61241	1.18506	2	0.11249	7.02	2	1211.7	-2.2144	0
vkETmVPk	9	6	1	P11839	N-Term(iTRAQ8plex); K2(iTRAQ8plex); M5(Oxidation); K8(iTRAQ8plex)	0.886378	9	14.6465	0.950482	9	13.4193	1.54446	9	20.3505	1.11058	9	19.2765	1.79112	9	14.0164	6.75	4	1860.14	-0.517166	1
aALQEASTQAk	1	3	1	F1MDD5	N-Term(iTRAQ8plex); K11(iTRAQ8plex)	1.25069	1		1.10118	1		0.823915	1		1.15028	1		0.57591	1		6.7	3	1726	0.510881	0
aGGVFTPGAAFSR	1	4	1	F1MX05	N-Term(iTRAQ8plex)	0.457844	1		0.457007	1		1.08019	1		0.66678	1		0.895326	1		6.46	2	1541.83	-3.01837	0
dVSEVVTPR	1	5	1	A5YBU9	N-Term(iTRAQ8plex)	1.87444	1		1.09339	1		1.38534	1		1.30974	1		1.3247	1		5.99	2	1305.73	-3.36276	0
gGcEAIVDTGTSLmVGPVDEVR	1	1	1	Q9MZS8	N-Term(iTRAQ8plex); C3(Carbamidomethyl); M14(Oxidation)	0.902234	1		0.950427	1		0.964665	1		1.20315	1		1.18529	1		5.94	3	2582.29	5.82955	0
lGEVSTYTDDLQk	1	3	1	F1N3Q7	N-Term(iTRAQ8plex); K13(iTRAQ8plex)	0.716709	1		0.458811	1		0.549734	1		0.510927	1		0.59396	1		5.9	3	2077.13	-0.704173	0
tPGPGAQSALR	1	7	1	W5P3D6	N-Term(iTRAQ8plex)	0.739224	1		1.01812	1		0.510762	1		0.397698	1		0.454889	1		5.69	2	1358.76	-8.40409	0
eQISNSNRMVEEGAAk	2	1	1	F1N1C5	N-Term(iTRAQ8plex); K16(iTRAQ8plex)	2.04245	2	18.2622	2.85423	2	142.795	1.16306	2	25.462	2.25075	2	6.8414	1.62249	2	17.1548	5.44	4	2371.23	-7.61765	1
dIIcQIAYAR	1	15	1	Q95276	N-Term(iTRAQ8plex); C4(Carbamidomethyl)	0.621274	1		0.953897	1		0.585999	1		0.430598	1		1.05271	1		5.24	2	1526.83	0.301785	0
hkEmxFPk	4	38	6	P11839;Q9TSI0;D7NJ85;J9UHS4;Q155X5;Q6UN62	N-Term(iTRAQ8plex); K2(iTRAQ8plex); M4(Oxidation); X5(P); K8(iTRAQ8plex)																4.56	4	1942.12	-5.51054	1
fHPDTDDAPVPAPAGDQk	1	2	1	F1RIP6	N-Term(iTRAQ8plex); K18(iTRAQ8plex)	1.39177	1		1.27375	1		1.61839	1		1.94256	1		1.62894	1		4.45	4	2486.28	-0.298171	0
mDPAEEDTNVYTEk	1	2	1	L8I958	N-Term(iTRAQ8plex); K14(iTRAQ8plex)	1.98135	1		1.4517	1		1.63944	1		1.47163	1		1.23875	1		4.26	3	2250.1	-2.94126	0
yLLFcmENSAEPEQSLVcQcLVR	1	2	1	G5E5H7	N-Term(iTRAQ8plex); C5(Carbamidomethyl); M6(Oxidation); C18(Carbamidomethyl); C20(Carbamidomethyl)	0.198663	1		0.11155	1		0.136449	1		0.178656	1		0.163614	1		3.42	3	3166.47	-9.4488	0
lkEccDkPVLEk	1	3	1	P14639	N-Term(iTRAQ8plex); K2(iTRAQ8plex); C4(Carbamidomethyl); C5(Carbamidomethyl); K7(iTRAQ8plex); K12(iTRAQ8plex)	0.761408	1		0.82826	1		1.73863	1		0.987741	1		1.2168	1		3.2	4	2735.58	-1.75658	1
fFDDkIAkYxPIQYVLSR	1	1	1	D2SZE3	N-Term(iTRAQ8plex); K5(iTRAQ8plex); K8(iTRAQ8plex); X10(V)	0.699984	1		0.808325	1		0.877445	1		1.00586	1		1.01752	1		3.09	6	3114.79	-6.90647	2
lENEIQTYR	1	5	1	S9WUY9	N-Term(iTRAQ8plex)	1.10824	1		0.9723	1		0.952156	1		1.00314	1		1.19684	1		2.76	2	1469.79	-3.0475	0
sPAQTxQWQVLPNAVPAk	1	1	1	D2SZC1	N-Term(iTRAQ8plex); X6(C); X6(Carbamidomethyl); K18(iTRAQ8plex)	1.33839	1		1.27973	1		1.14832	1		1.11408	1		1.17774	1		0.64	3	2603.42	-1.47961	0
kHPkPVPVSNAEGSQPDDSSS	1	4	1	L8I632	N-Term(iTRAQ8plex); K1(iTRAQ8plex); K4(iTRAQ8plex)	1.14724	1		0.874911	1		0.909704	1		0.718584	1		0.932241	1		0.36	4	3075.66	3.06918	1
dAPSPVDAAFR	2	3	1	W5QAB1	N-Term(iTRAQ8plex)	3.79626	2	4.89087	2.02073	2	7.31152	1.60683	2	27.5144	1.18373	2	12.1801	0.751453	2	23.9255	32.62	2	1449.76	-4.31332	0
iVLVDNk	1	1	1	W5PPQ8	N-Term(iTRAQ8plex); K7(iTRAQ8plex)	0.380481	1		0.559916	1		0.555065	1		0.60547	1		0.778162	1		28.79	2	1408.9	-1.49299	0
tVDVPck	2	1	1	W5PGE9	N-Term(iTRAQ8plex); C6(Carbamidomethyl); K7(iTRAQ8plex)	0.466416	2	1.15098	0.43113	2	2.01433	0.459397	2	7.04256	0.555647	2	3.15819	0.68074	2	1.55453	28.66	2	1426.82	0.0727101	0
qTQEALIk	1	1	1	W5NRG7	N-Term(iTRAQ8plex); K8(iTRAQ8plex)	1.77044	1		1.66098	1		1.11769	1		1.05893	1		0.78192	1		28.48	2	1538.93	-1.20702	0
aQYDELAQk	1	9	1	A1XEA5	N-Term(iTRAQ8plex); K9(iTRAQ8plex)	1.23057	1		1.19704	1		1.38094	1		1.40189	1		2.18969	1		27.82	3	1673.93	-1.64881	0
vAQQGLk	2	10	2	W5Q6U0;Q06B57	N-Term(iTRAQ8plex); K7(iTRAQ8plex)																27.05	2	1351.84	-9.51039	0
aIcSEk	26	19	1	P00712	N-Term(iTRAQ8plex); C3(Carbamidomethyl); K6(iTRAQ8plex)	1.31522	13	27.4679	1.46716	13	37.9368	6.00027	13	155.981	4.45452	13	59.8801	4.30749	13	62.47	26.93	2	1315.75	-0.246181	0
lINEYVk	1	10	1	L8IM56	N-Term(iTRAQ8plex); K7(iTRAQ8plex)	0.99496	1		1.0703	1		1.23455	1		0.917699	1		1.0936	1		26.62	2	1486.9	-3.91251	0
mLTAEEk	1	28	1	P02075	N-Term(iTRAQ8plex); K7(iTRAQ8plex)	1.35277	1		0.385919	1		0.168597	1		0.245652	1		0.345384	1		26.47	2	1429.82	-1.32296	0
aAQPVDSAk	1	1	1	W5P1C2	N-Term(iTRAQ8plex); K9(iTRAQ8plex)	1.43025	1		1.42004	1		1.69348	1		2.35324	1		2.57908	1		26.33	2	1494.88	1.839	0
aGEIQNk	3	5	1	A6QNW3	N-Term(iTRAQ8plex); K7(iTRAQ8plex)	0.873393	3	9.95253	0.750442	3	53.3473	1.0569	3	24.8938	2.12897	3	34.7691	1.86888	3	31.1627	26.14	2	1367.8	-4.69416	0
eMPFPk	380	39	6	P11839;Q9TSI0;D7NJ85;J9UHS4;Q155X5;Q6UN62	N-Term(iTRAQ8plex); K6(iTRAQ8plex)																25.63	3	1356.78	-3.9429	0
mLDTSTLLk	1	2	1	W5PZI1	N-Term(iTRAQ8plex); M1(Oxidation); K9(iTRAQ8plex)	1.11919	1		3.22391	1		1.1052	1		1.01224	1		0.827635	1		25.2	2	1645.96	-1.70248	0
eFLDVIk	1	9	1	A2AXH8	N-Term(iTRAQ8plex); K7(iTRAQ8plex)	1.74737	1		1.99935	1		1.73261	1		0.868665	1		0.725498	1		24.95	2	1471.89	-3.19531	0
aDALVGk	1	5	2	W5NRI1;Q2UVX4	N-Term(iTRAQ8plex); K7(iTRAQ8plex)																24.91	2	1281.8	0.0564468	0
eAGQGAk	3	20	1	W5PJR5	N-Term(iTRAQ8plex); K7(iTRAQ8plex)	1.29965	3	7.88647	2.3133	3	12.9933	0.978656	3	32.6837	1.56446	3	37.9248	1.5548	3	25.3459	24.87	3	1268.74	-4.98329	0
lMNVFLk	2	4	1	Q2UVX4	N-Term(iTRAQ8plex); K7(iTRAQ8plex)	1.02693	2	1.84427	1.05368	2	5.47389	1.0295	2	2.48152	1.08824	2	1.25666	1.11308	2	15.2004	24.59	3	1472.91	-1.02298	0
mYTSNYELk	1	1	1	W5PMH6	N-Term(iTRAQ8plex); M1(Oxidation); K9(iTRAQ8plex)	1.19714	1		1.63618	1		2.2043	1		3.35541	1		2.19919	1		24.54	2	1772.92	-6.83572	0
aAQVTIk	1	1	1	W5NSA6	N-Term(iTRAQ8plex); K7(iTRAQ8plex)	1.30529	1		1.53113	1		1.57159	1		1.13615	1		1.11145	1		23.7	2	1338.85	-7.22408	0
qEGVFAk	1	7	2	W5Q6U0;Q06B57	N-Term(iTRAQ8plex); K7(iTRAQ8plex)																23.57	2	1386.81	-6.17983	0
lLNVGFk	2	6	2	F1SE74;E9NRZ3	N-Term(iTRAQ8plex); K7(iTRAQ8plex)																23.46	3	1398.89	-1.84992	0
gAMTGAk	3	12	2	A6ZE99;L8I632	N-Term(iTRAQ8plex); K7(iTRAQ8plex)																23.06	3	1243.73	-0.986174	0
sPAQTxQWQVLPNAVPAk	2	1	1	D2SZC1	N-Term(iTRAQ8plex); X6(M); K18(iTRAQ8plex)	0.806115	2	5.29172	0.865351	2	18.5081	1.18608	2	0.756778	0.988997	2	18.4639	1.50669	2	5.849	22.98	3	2574.47	13.6456	0
tcEEcLk	1	4	1	L8IG34	N-Term(iTRAQ8plex); C2(Carbamidomethyl); C5(Carbamidomethyl); K7(iTRAQ8plex)	1.84328	1		2.1432	1		2.39467	1		3.23187	1		3.07082	1		22.06	2	1547.8	-4.09069	0
nVDTNQDR	1	5	1	F1RIP6	N-Term(iTRAQ8plex)	0.948189	1		0.585909	1		0.621789	1		0.884536	1		0.745976	1		21.97	2	1265.63	-6.10941	0
gEGFLck	1	5	1	W5P5I0	N-Term(iTRAQ8plex); C6(Carbamidomethyl); K7(iTRAQ8plex)	0.667943	1		0.564489	1		0.434257	1		0.399888	1		0.270952	1		21.9	2	1418.78	-7.35097	0
lIEELk	72	49	2	W5NPT7;S9X3E6	N-Term(iTRAQ8plex); K6(iTRAQ8plex)																21.46	3	1352.86	-1.98972	0
iMALHPR	4	1	1	G3MXW7	N-Term(iTRAQ8plex)	1.24523	4	17.9079	1.07979	4	3.76041	1.30051	4	5.93149	1.61635	4	10.6757	1.74984	4	9.81761	21.26	3	1141.68	-0.129246	0
rEDDIAk	1	11	2	W5PMT0;S9Y4T1	N-Term(iTRAQ8plex); K7(iTRAQ8plex)																20.79	3	1454.84	-3.47626	1
sTVELFk	1	6	1	F1SFA1	N-Term(iTRAQ8plex); K7(iTRAQ8plex)	0.994188	1		1.34949	1		0.940228	1		0.70364	1		0.857364	1		20.75	3	1431.86	-1.50444	0
scQDQPTTMAR	4	42	3	P50420;D2SZA9;Q6YLM3	N-Term(iTRAQ8plex); C2(Carbamidomethyl)																20.68	2	1598.75	-1.43931	0
sPAQTLQWQVLPNTMPAk	1	1	1	Q95MX4	N-Term(iTRAQ8plex); K18(iTRAQ8plex)	1.37783	1		1.85251	1		2.64149	1		1.39493	1		1.80676	1		20.64	2	2618.48	7.5608	0
aNPTASk	1	2	1	W5Q5J5	N-Term(iTRAQ8plex); K7(iTRAQ8plex)	1.02003	1		0.748648	1		0.593335	1		0.41553	1		0.456406	1		20.59	2	1296.76	-6.54341	0
aTGNEcPk	1	10	1	F1MVS9	N-Term(iTRAQ8plex); C6(Carbamidomethyl); K8(iTRAQ8plex)	0.822383	1		0.829566	1		1.08734	1		1.33329	1		1.58692	1		20.14	2	1484.79	-5.92051	0
dDVPSER	3	3	1	B5B3R8	N-Term(iTRAQ8plex)	0.825885	3	11.0476	0.960719	3	8.68469	1.64092	3	13.9048	2.10266	3	13.0884	2.31856	3	7.18567	20.07	2	1121.57	-4.6971	0
hNTIPDk	1	2	1	W5PNP1	N-Term(iTRAQ8plex); K7(iTRAQ8plex)	0.901311	1		0.787913	1		0.966312	1		1.04643	1		0.846283	1		19.23	2	1432.83	-3.06822	0
mAIPPkk	2	1	1	V5RMG9	N-Term(iTRAQ8plex); K6(iTRAQ8plex); K7(iTRAQ8plex)	1.59625	2	4.92893	1.74403	2	2.17128	2.35267	2	2.0813	2.47988	2	21.2498	3.32903	2	16.3699	19.07	2	1697.08	-7.03688	1
gIVPLAk	1	5	1	W5PMM7	N-Term(iTRAQ8plex); K7(iTRAQ8plex)	0.385615	1		0.414601	1		0.323277	1		0.318114	1		0.352804	1		19.01	2	1305.87	0.230038	0
eQLSAPVAGTPR	2	1	1	W5QDQ1	N-Term(iTRAQ8plex)	1.99266	2	4.77958	1.59111	2	12.4074	2.43656	2	11.7635	3.05918	2	8.16537	3.37553	2	4.76312	18.9	2	1529.86	-2.24528	0
vTmQNLNDR	1	26	2	W5Q6L8;S9WUY9	N-Term(iTRAQ8plex); M3(Oxidation)																18.87	2	1410.73	-1.85082	0
qTFGEAIk	1	7	1	Q9MZS8	N-Term(iTRAQ8plex); K8(iTRAQ8plex)	0.710438	1		0.530288	1		0.529935	1		0.522921	1		0.544515	1		18.67	2	1501.87	-7.55949	0
kRAADGLDAcPIPPk	4	1	1	S9XJH6	N-Term(iTRAQ8plex); K1(iTRAQ8plex); C10(Carbamidomethyl); K15(iTRAQ8plex)	1.17785	4	6.07324	1.21814	4	13.0549	1.56624	4	15.0166	1.5999	4	11.5976	1.89716	4	11.3886	18.55	4	2521.45	-6.74705	2
eAAEMGk	1	26	1	E1BED8	N-Term(iTRAQ8plex); K7(iTRAQ8plex)	0.530385	1		0.87347	1		0.576842	1		0.468357	1		0.498699	1		17.98	2	1343.74	-4.55756	0
lIDAVGFSPLR	1	4	0		N-Term(iTRAQ8plex)																17.81	2	1491.88	-3.02525	0
aEFQGVLEk	2	4	2	W5NUX8;E1BH06	N-Term(iTRAQ8plex); K9(iTRAQ8plex)																17.64	3	1628.94	-3.22223	0
tILPPRP	5	1	1	W5PTZ8	N-Term(iTRAQ8plex)	1.69375	5	17.0521	1.85206	5	19.9072	2.02955	5	45.3286	2.18987	5	57.5457	3.07983	5	27.212	17.06	2	1097.7	-2.59367	0
vTVLGQPk	3	1	1	F1MLW8	N-Term(iTRAQ8plex); K8(iTRAQ8plex)	0.369215	3	0.535569	0.483775	3	0.848903	0.443395	3	43.6315	0.345167	3	40.9703	0.388393	3	1.94761	16.91	2	1449.93	1.87499	0
nTEISFk	2	19	1	C0LSL0	N-Term(iTRAQ8plex); K7(iTRAQ8plex)	1.33821	2	17.3479	2.11798	2	12.7251	1.52609	2	7.28889	1.54731	2	3.24389	1.51997	2	11.6776	16.72	2	1446.83	-5.41851	0
kIIAEk	45	57	2	P67975;G5E5H7	N-Term(iTRAQ8plex); K1(iTRAQ8plex); K6(iTRAQ8plex)																16.63	4	1614.07	-3.2045	1
sEGVAIDPAR	1	3	1	W5PSD8	N-Term(iTRAQ8plex)	1.05908	1		1.08068	1		1.4057	1		1.70057	1		1.79569	1		16.39	2	1318.73	-1.12374	0
aVEHLQk	2	8	2	W5NWM2;F1N3Q7	N-Term(iTRAQ8plex); K7(iTRAQ8plex)																16.01	3	1432.87	-3.32091	0
tPcTVTcNIPVVSGk	1	9	1	A6QPX7	N-Term(iTRAQ8plex); C3(Carbamidomethyl); C7(Carbamidomethyl); K15(iTRAQ8plex)	1.73229	1		2.14677	1		2.45286	1		2.25248	1		1.85125	1		15.64	2	2241.22	-1.04177	0
sDFSDEER	1	5	1	F1MVS9	N-Term(iTRAQ8plex)	0.742127	1		0.752344	1		0.779954	1		0.887243	1		1.01894	1		15.43	2	1288.59	-2.20095	0
vTAPGATR	1	16	1	B2CB99	N-Term(iTRAQ8plex)	0.643497	1		0.872703	1		0.905277	1		0.893783	1		1.35685	1		15.04	2	1076.63	-2.32251	0
vLVYkSEDIk	8	4	1	F1SA97	N-Term(iTRAQ8plex); K5(iTRAQ8plex); K10(iTRAQ8plex)	0.916431	1		0.831596	1		0.995629	1		1.14225	1		1.44406	1		15	4	2106.29	-3.19676	1
iTFYQDGk	1	4	1	W5PK06	N-Term(iTRAQ8plex); K8(iTRAQ8plex)	0.364359	1		0.280165	1		0.306947	1		0.303136	1		0.329501	1		14.6	3	1579.89	-0.46689	0
aQHPEAk	3	11	2	W5PMT0;S9Y4T1	N-Term(iTRAQ8plex); K7(iTRAQ8plex)																14.33	3	1388.81	0.0736711	0
tTVVLAPLGDDFR	1	6	1	S9X7P1	N-Term(iTRAQ8plex)	0.555087	1		0.461943	1		0.469476	1		0.477631	1		0.470354	1		13.51	2	1707.95	-4.02686	0
iccEkDER	1	1	1	P02669	N-Term(iTRAQ8plex); C2(Carbamidomethyl); C3(Carbamidomethyl); K5(iTRAQ8plex)	1.07563	1		1.09556	1		2.15176	1		1.78987	1		2.16418	1		12.76	2	1717.87	-5.35947	1
scQDQPTxMAR	6	1	1	D2SZA9	N-Term(iTRAQ8plex); C2(Carbamidomethyl); X8(Q)	1.76859	6	2.86137	1.48704	6	34.8863	1.94128	6	14.8215	2.67745	6	11.9364	2.6824	6	15.8781	11.61	3	1625.77	-0.319378	0
dSLFNYQk	1	4	1	W5Q5H8	N-Term(iTRAQ8plex); K8(iTRAQ8plex)	1.58681	1		2.51303	1		2.07583	1		2.20131	1		1.70561	1		11.44	3	1622.9	0.102429	0
lDSSLDEYLSLQEQLTDVEk	1	6	1	S9XE49	N-Term(iTRAQ8plex); K20(iTRAQ8plex)	0.94029	1		3.31894	1		0.673432	1		0.70842	1		0.820808	1		11.41	4	2933.56	5.52938	0
aTVIFEGER	1	1	1	W5Q268	N-Term(iTRAQ8plex)	0.923912	1		0.827221	1		0.936191	1		0.930432	1		0.915312	1		10.81	2	1325.73	-3.83661	0
tLNPEYLGQDGVQR	3	1	1	W5NPK5	N-Term(iTRAQ8plex)	1.16419	3	19.0481	1.14953	3	3.51427	1.35529	3	32.8386	1.35272	3	14.08	1.71329	3	17.7099	9.28	2	1893.99	-2.63792	0
lPLQDVYk	1	26	1	E1BED8	N-Term(iTRAQ8plex); K8(iTRAQ8plex)	0.714026	1		1.25684	1		0.522597	1		0.345349	1		0.51721	1		9.24	3	1583.96	-0.69816	0
eIAEAYLGk	1	6	1	P19120	N-Term(iTRAQ8plex); K9(iTRAQ8plex)	1.46515	1		0.859134	1		0.866931	1		1.14277	1		1.29883	1		9.21	3	1601.94	-0.352332	0
hPHPHLSFMAIPPkk	2	147	10	P02669;D2SZE0;D2SZC1;D2SZE3;D2SZA9;P50420;A0SWQ7;Q5C9G9;Q6YLM3;B6CXY7	N-Term(iTRAQ8plex); K14(iTRAQ8plex); K15(iTRAQ8plex)																9.19	5	2649.55	-3.09163	1
sPAQTLQWQVLPNTmPAk	1	1	1	Q95MX4	N-Term(iTRAQ8plex); M15(Oxidation); K18(iTRAQ8plex)	1.0643	1		1.29181	1		0.895719	1		1.09515	1		1.2357	1		8.92	3	2634.43	-8.16775	0
eIGSSGSk	1	1	1	W5Q5H8	N-Term(iTRAQ8plex); K8(iTRAQ8plex)	2.12796	1		2.43295	1		4.05973	1		1.73231	1		1.41566	1		7.33	2	1372.78	-6.75744	0
vFcTSSLk	1	3	1	W5P0W4	N-Term(iTRAQ8plex); C3(Carbamidomethyl); K8(iTRAQ8plex)	0.940371	1		0.96009	1		1.2563	1		1.46138	1		1.80532	1		6.93	2	1549.89	-0.517053	0
gQVcVVTGASR	1	4	1	L8HQV0	N-Term(iTRAQ8plex); C4(Carbamidomethyl)	0.809785	1		0.890511	1		0.855409	1		1.01347	1		0.932267	1		6.07	2	1437.78	1.71664	0
lTEEEkNR	3	9	2	P04654;E7BQS3	N-Term(iTRAQ8plex); K6(iTRAQ8plex)																5.33	3	1626.93	-1.18398	1
tSALEcIR	1	9	1	D3G9G3	N-Term(iTRAQ8plex); C6(Carbamidomethyl)	1.08214	1		1.62383	1		0.804781	1		0.817395	1		1.0468	1		4.29	2	1253.68	-3.11789	0
gGSTRPPcR	1	1	1	W5PTZ8	N-Term(iTRAQ8plex); C8(Carbamidomethyl)	1.59616	1		1.93195	1		2.87977	1		2.88732	1		4.73206	1		4.07	3	1291.68	-2.63531	0
vLVLNTDYkk	7	1	1	Q8MHZ7	N-Term(iTRAQ8plex); K9(iTRAQ8plex); K10(iTRAQ8plex)	0.712721	7	12.9037	0.664223	7	19.7679	0.821809	7	22.9459	0.931041	7	5.6544	1.08763	7	7.37457	2.98	4	2105.28	-16.0072	1
yGVSGYPTLk	1	5	1	W5PMM7	N-Term(iTRAQ8plex); K10(iTRAQ8plex)	0.886693	1		0.690996	1		0.765081	1		0.650061	1		0.774412	1		2.47	3	1692.98	0.673289	0
sLHTLFGDELck	1	7	3	P14639;P02769;X2GM95	N-Term(iTRAQ8plex); C11(Carbamidomethyl); K12(iTRAQ8plex)																1.8	4	2028.1	-0.392928	0
dYAGVFTDAGLTFk	1	1	1	W5NRI1	N-Term(iTRAQ8plex); K14(iTRAQ8plex)	1.2276	1		0.928594	1		1.10511	1		1.22659	1		1.54003	1		1.72	3	2113.14	-1.24627	0
eNLPLEESkLFMTTEPTNVR	1	3	1	L8HR26	N-Term(iTRAQ8plex); K9(iTRAQ8plex)	0.939997	1		0.97664	1		1.32299	1		0.78646	1		1.25969	1		0.33	6	2956.61	4.72299	1
aHYDLR	1	5	1	L8HQH4	N-Term(iTRAQ8plex)	0.802197	1		0.864247	1		0.845529	1		0.683298	1		0.691922	1		29.33	3	1078.59	-1.57669	0
iDELEPR	2	8	1	W5Q302	N-Term(iTRAQ8plex)	0.766047	2	10.8029	0.733063	2	16.3667	0.679631	2	2.81461	0.707999	2	7.25916	0.846732	2	12.6046	27.97	2	1175.65	-2.99842	0
tLVEGLk	2	3	1	W5PFL8	N-Term(iTRAQ8plex); K7(iTRAQ8plex)	0.611207	2	13.3497	0.693844	2	2.9707	0.686549	2	6.04635	0.744428	2	3.62984	0.731638	2	10.5486	26.85	2	1367.87	-4.52758	0
lQQLEDk	1	5	1	I1WXR3	N-Term(iTRAQ8plex); K7(iTRAQ8plex)	1.30258	1		1.22359	1		1.54088	1		1.36483	1		1.19003	1		23.92	3	1481.87	-4.7506	0
nEQVEIR	1	9	2	Q2UVX4;S9XDK9	N-Term(iTRAQ8plex)																23.29	2	1191.66	-3.60339	0
gVLEQLR	6	11	2	W5PMT0;S9Y4T1	N-Term(iTRAQ8plex)																21.36	2	1118.68	-0.556345	0
sANSPDGk	1	4	1	L8II39	N-Term(iTRAQ8plex); K8(iTRAQ8plex)	0.533291	1		1.07364	1		0.780377	1		0.541289	1		0.638701	1		21.26	2	1383.76	-3.25306	0
dELDQISk	1	1	1	P09954	N-Term(iTRAQ8plex); K8(iTRAQ8plex)	0.883046	1		0.99139	1		2.48349	1		2.00361	1		2.30389	1		20.52	2	1555.88	1.2093	0
vIAAEGEmNASR	1	6	1	T0MKA5	N-Term(iTRAQ8plex); M8(Oxidation)	0.698074	1		0.716138	1		0.505454	1		0.62344	1		0.568579	1		20.31	2	1567.8	-1.39698	0
mGTYSLVPk	2	4	1	W5NR66	N-Term(iTRAQ8plex); K9(iTRAQ8plex)	0.872249	2	21.3003	0.94268	2	26.2757	1.03316	2	3.76376	1.82929	2	3.83343	1.848	2	23.0135	19.39	2	1603.93	-0.550131	0
lVHVQk	2	16	1	C0LSL0	N-Term(iTRAQ8plex); K6(iTRAQ8plex)	1.48379	2	10.8166	1.98677	2	4.65499	2.03118	2	3.90312	1.96831	2	7.26126	2.20515	2	0.470598	19.17	3	1331.86	-3.86427	0
qNTLPSk	2	12	1	Q9XSY9	N-Term(iTRAQ8plex); K7(iTRAQ8plex)	2.35819	2	12.9289	1.8946	2	42.4358	1.69212	2	92.1093	4.31321	2	153.374	3.07212	2	121.539	18.09	2	1395.84	-3.05439	0
sMPEQTGEk	1	6	1	L8I3C7	N-Term(iTRAQ8plex); K9(iTRAQ8plex)	0.687515	1		1.08775	1		0.958272	1		0.93924	1		0.927056	1		17.54	3	1614.86	-3.34637	0
gNQQSPR	1	9	1	B8Y9T0	N-Term(iTRAQ8plex)	0.58641	1		0.791359	1		0.604709	1		0.837293	1		0.464347	1		16.22	2	1090.59	-1.28399	0
aVLYNYR	1	2	2	W5NPK5;S9XDK9	N-Term(iTRAQ8plex)																16.2	2	1202.68	0.826934	0
vLbSFSbGLk	1	1	1	P02080	N-Term(iTRAQ8plex); B3(D); B7(D); K10(iTRAQ8plex)	1.24881	1		0.535912	1		0.536454	1		0.970346	1		0.952784	1		14.38	2	1688.97	-0.866232	0
dIFQEIYDk	1	9	1	Q0QEQ3	N-Term(iTRAQ8plex); K9(iTRAQ8plex)	1.29431	1		1.88628	1		1.64566	1		2.13863	1		1.58953	1		13.13	3	1778.97	-4.80474	0
vYQWEDPDPk	1	3	2	W5Q6U0;Q06B57	N-Term(iTRAQ8plex); K10(iTRAQ8plex)																13.06	2	1884.99	-1.19034	0
yFVPPSER	1	1	1	D6PZY4	N-Term(iTRAQ8plex)	1.32193	1		1.08817	1		1.19771	1		1.09433	1		1.00626	1		9.79	2	1298.7	-0.292652	0
tDASDVkPc	1	2	1	W5Q268	N-Term(iTRAQ8plex); K7(iTRAQ8plex); C9(Carbamidomethyl)	1.15786	1		0.897967	1		1.15081	1		1.04244	1		0.800613	1		8.85	2	1600.84	-1.21279	0
eVEISIPASFFPR	1	2	1	W5NPT7	N-Term(iTRAQ8plex)	1.34218	1		0.985463	1		0.955412	1		1.50784	1		2.15342	1		6.92	2	1795.99	-0.322958	0
tITMLDEQGEQLk	1	3	1	L8I2N6	N-Term(iTRAQ8plex); K13(iTRAQ8plex)	0.966792	1		0.930549	1		1.04568	1		1.04392	1		0.949875	1		6.26	3	2114.16	-2.73961	0
aADGLDAcPIPPk	1	1	1	S9XJH6	N-Term(iTRAQ8plex); C8(Carbamidomethyl); K13(iTRAQ8plex)	1.26859	1		1.67722	1		1.40672	1		1.62339	1		1.73567	1		4.56	3	1933.06	-2.21505	0
eNINNPSk	1	1	1	W5PYA9	N-Term(iTRAQ8plex); K8(iTRAQ8plex)	1.45338	1		1.78772	1		0.686535	1		0.984284	1		0.592028	1		2.88	2	1523.86	-0.704002	0
qFMEAEHSR	1	2	1	Q06B57	N-Term(iTRAQ8plex)	1.72062	1		1.24992	1		0.760543	1		0.915843	1		1.31547	1		2.85	3	1438.71	-0.0208923	0
yPVEPF	7	2	1	J9UHS4	N-Term(iTRAQ8plex)	1.42248	7	23.3099	1.80368	7	26.5859	2.38083	7	26.8204	4.55569	7	27.3527	4.46492	7	29.4433	28.72	2	1055.57	-3.85659	0
gSDPVLk	1	7	1	S9Y209	N-Term(iTRAQ8plex); K7(iTRAQ8plex)	0.864238	1		0.729467	1		1.04414	1		1.32269	1		1.34971	1		27.97	2	1323.8	-6.17035	0
aVPEAEGPQR	1	1	1	W5PFC9	N-Term(iTRAQ8plex)	1.91557	1		0.650858	1		0.706808	1		0.732572	1		0.693672	1		25.09	2	1357.73	-4.44436	0
dSQEEEk	1	8	1	T0MIA6	N-Term(iTRAQ8plex); K7(iTRAQ8plex)	0.868442	1		1.04452	1		1.87012	1		1.79091	1		1.68757	1		24.03	2	1472.77	0.218186	0
lPENVVVk	1	2	1	Q7M371	N-Term(iTRAQ8plex); K8(iTRAQ8plex)	1.06794	1		1.70432	1		2.27173	1		1.36631	1		1.4766	1		22.58	3	1505.95	2.07643	0
yDccQk	1	1	1	W5Q927	N-Term(iTRAQ8plex); C3(Carbamidomethyl); C4(Carbamidomethyl); K6(iTRAQ8plex)	0.512663	1		0.459022	1		0.511506	1		0.530498	1		0.409603	1		21.16	2	1481.73	-0.823243	0
nQLVDMk	1	1	1	W5Q5H8	N-Term(iTRAQ8plex); K7(iTRAQ8plex)	1.94924	1		2.87597	1		2.46809	1		1.71363	1		1.54782	1		20.76	2	1455.84	-5.50861	0
qVTESAPDSSTAPL	1	1	1	W5PJA0	N-Term(iTRAQ8plex)	1.23871	1		1.36489	1		0.993325	1		0.831611	1		1.98802	1		20.37	2	1706.86	-6.65328	0
qEEGIVLk	1	3	1	Q4VS17	N-Term(iTRAQ8plex); K8(iTRAQ8plex)	1.28081	1		1.48112	1		6.55199	1		1.91271	1		2.51275	1		19.89	2	1523.92	-0.961712	0
vbPVbFk	2	50	1	C6ZP46	N-Term(iTRAQ8plex); B2(D); B5(N); K7(iTRAQ8plex)	1.34008	1		0.38033	1		0.421527	1		0.535124	1		0.749072	1		19.38	3	1426.85	1.6702	0
lPDVQLPTNk	1	2	1	W5PTG9	N-Term(iTRAQ8plex); K10(iTRAQ8plex)	0.496778	1		0.50016	1		0.5476	1		0.434421	1		0.51636	1		17.06	3	1733.03	-4.21995	0
iIVPLNSR	1	2	1	W5PPQ8	N-Term(iTRAQ8plex)	0.501823	1		0.379562	1		0.276778	1		0.369537	1		0.393568	1		16.75	2	1215.77	0.359926	0
eVDIGIPDATGR	1	7	1	L8IC82	N-Term(iTRAQ8plex)	0.591949	1		0.737929	1		0.540879	1		0.514803	1		0.476173	1		15.95	2	1546.84	0.345999	0
gAAPGk	2	6	1	W5NUN9	N-Term(iTRAQ8plex); K6(iTRAQ8plex)	0.23441	2	16.7266	0.139918	2	31.2983	0.13544	2	49.3643	0.140618	2	49.4453	0.151468	2	62.4153	15.04	3	1108.69	-1.78577	0
aDIEEIk	1	4	1	W5P1C2	N-Term(iTRAQ8plex); K7(iTRAQ8plex)	1.33487	1		1.13328	1		1.29892	1		1.69012	1		1.76335	1		14.12	2	1425.83	-5.95879	0
sIPDTVGELQVIELNLNQNQISQISVk	1	2	1	Q58D71	N-Term(iTRAQ8plex); K27(iTRAQ8plex)	1.97355	1		1.5738	1		2.08122	1		3.28884	1		3.61453	1		13.79	3	3587.99	-6.41846	0
sLPcDIck	1	10	1	A1L555	N-Term(iTRAQ8plex); C4(Carbamidomethyl); C7(Carbamidomethyl); K8(iTRAQ8plex)	0.919034	1		0.678473	1		1.10232	1		0.847215	1		1.03513	1		13.42	2	1600.86	-4.38245	0
eVVDPTk	3	4	1	L8HQH4	N-Term(iTRAQ8plex); K7(iTRAQ8plex)	0.672999	3	2.82684	0.832906	3	33.0196	1.00778	3	17.779	0.729752	3	17.3531	1.17529	3	14.5421	12.68	2	1395.83	-0.438296	0
gLFIIDDk	1	12	1	Q4JJA4	N-Term(iTRAQ8plex); K8(iTRAQ8plex)	0.558907	1		2.23534	1		0.533675	1		0.434488	1		0.52992	1		12.62	3	1528.91	-4.29311	0
vEILANDQGNR	2	70	3	K8FK38;P19120;F5CV66	N-Term(iTRAQ8plex)																12.42	2	1532.83	-4.24667	0
gAGLGAk	1	5	1	T0NH57	N-Term(iTRAQ8plex); K7(iTRAQ8plex)	1.0208	1		1.10207	1		1.22274	1		1.19428	1		1.17402	1		12.04	3	1181.74	-1.44728	0
vLDELTLAR	1	19	1	W5Q6L8	N-Term(iTRAQ8plex)	0.989712	1		1.31223	1		0.81819	1		0.85165	1		1.20361	1		11.89	2	1333.79	-3.33927	0
nEPNPQR	1	7	2	F1SE74;E9NRZ3	N-Term(iTRAQ8plex)																11.43	2	1158.61	-4.13698	0
ecEEIIR	3	8	1	A6QPX7	N-Term(iTRAQ8plex); C2(Carbamidomethyl)	1.64466	3	20.1499	1.96923	3	5.43777	1.97533	3	5.75809	1.14143	3	13.3406	1.08735	3	2.39185	11.34	2	1252.65	-3.88905	0
qQLDYGVYVINQAGESmFNR	1	1	1	F1SE74	N-Term(iTRAQ8plex); M17(Oxidation)	1.37493	1		0.879777	1		0.782461	1		0.673264	1		0.864443	1		9.85	3	2652.31	1.6555	0
lHTDVPSR	1	1	1	W5QHZ8	N-Term(iTRAQ8plex)	0.788539	1		0.723953	1		1.19046	1		0.761565	1		0.764634	1		5.87	3	1228.69	-0.288081	0
sPAQTLQWQVLPNxVPAk	2	3	1	D2SZE3	N-Term(iTRAQ8plex); X14(M); X14(Oxidation); K18(iTRAQ8plex)	0.658745	2	39.7968	1.15124	2	83.3522	0.881096	2	28.2425	0.998576	2	19.6296	1.27537	2	33.2154	5.61	5	2632.48	2.90315	0
sPAQTLQWxVLPNTVPAk	1	2	1	A0SWQ7	N-Term(iTRAQ8plex); X9(G); K18(iTRAQ8plex)	0.694005	1		1.02035	1		1.02008	1		0.759905	1		0.880512	1		5.22	3	2515.45	-1.70539	0
cIDGTcLck	2	7	1	W5P5I0	N-Term(iTRAQ8plex); C1(Carbamidomethyl); C6(Carbamidomethyl); C8(Carbamidomethyl); K9(iTRAQ8plex)	1.0486	1		0.869952	1		0.866954	1		1.01731	1		0.813254	1		5.12	3	1734.88	1.93528	0
sDNSGENR	1	10	1	F1MVS9	N-Term(iTRAQ8plex)	0.999794	1		0.764381	1		0.84968	1		1.29664	1		1.4697	1		25.96	2	1182.56	-1.98509	0
mQDLEAk	1	25	5	W5NXP3;W5Q0X5;W5Q124;W5PHI7;L8IM56	N-Term(iTRAQ8plex); K7(iTRAQ8plex)																25.93	2	1442.8	-6.39488	0
aLLYLcGGDD	1	6	1	F1S073	N-Term(iTRAQ8plex); C6(Carbamidomethyl)	1.29592	1		1.59022	1		1.0838	1		1.64875	1		1.73554	1		24.79	2	1400.7	-2.21488	0
iSPQDLVSLPR	1	1	1	S9W922	N-Term(iTRAQ8plex)	1.39904	1		1.22074	1		1.90169	1		2.66364	1		2.85517	1		23.74	2	1528.89	-8.3097	0
eVLSDPEMR	1	6	1	L8I378	N-Term(iTRAQ8plex)	0.927149	1		0.693743	1		0.79751	1		0.906177	1		1.22408	1		20.36	2	1379.71	-1.75523	0
iTDPLLk	4	2	1	W5PJG0	N-Term(iTRAQ8plex); K7(iTRAQ8plex)	1.76235	2	8.78938	0.48948	2	32.2053	0.412316	2	10.8235	0.569959	2	16.9098	0.433025	2	13.9381	17.81	3	1407.9	1.10514	0
qLFDQVVk	1	16	1	L8IBW5	N-Term(iTRAQ8plex); K8(iTRAQ8plex)	0.620218	1		0.889386	1		0.604696	1		0.524454	1		0.521923	1		17.32	3	1584.95	-1.32695	0
gDSVSHR	1	1	1	W5Q5H8	N-Term(iTRAQ8plex)	1.11055	1		1.4304	1		1.40182	1		0.7257	1		0.822488	1		16.65	2	1061.56	-3.6767	0
aPmPELVPk	1	2	1	W5PSA9	N-Term(iTRAQ8plex); M3(Oxidation); K9(iTRAQ8plex)	1.21636	1		0.952415	1		0.911353	1		1.43923	1		1.26777	1		16.54	2	1605.93	-9.62601	0
fAAmLPEYLk	1	1	1	S9XM89	N-Term(iTRAQ8plex); M4(Oxidation); K10(iTRAQ8plex)	1.88213	1		1.69954	1		2.30994	1		2.5818	1		2.19192	1		16.47	3	1807.02	-2.61231	0
iLEPTLk	4	3	1	W5PTG9	N-Term(iTRAQ8plex); K7(iTRAQ8plex)	0.879936	4	12.8231	1.03319	4	11.8692	1.1713	4	8.31881	1.07419	4	36.1858	0.905526	4	9.87771	16.1	3	1421.92	0.49719	0
mVQVASR	1	4	2	W5PMT0;S9Y4T1	N-Term(iTRAQ8plex)																15.33	2	1094.63	-2.29544	0
lFEAEAQDLFR	1	4	1	I3LDA5	N-Term(iTRAQ8plex)	0.993451	1		0.938592	1		1.03094	1		0.866071	1		0.906151	1		13.56	2	1642.87	-1.60796	0
aYQAIQR	1	5	2	W5Q6U0;Q06B57	N-Term(iTRAQ8plex)																12.19	2	1153.66	-4.21319	0
ccAADDk	3	7	2	P14639;P02769	N-Term(iTRAQ8plex); C1(Carbamidomethyl); C2(Carbamidomethyl); K7(iTRAQ8plex)																11.51	3	1447.71	-2.88345	0
eGTQATYk	1	2	1	D6PZY4	N-Term(iTRAQ8plex); K8(iTRAQ8plex)	1.00705	1		1.00006	1		1.18126	1		1.04253	1		0.767421	1		10.9	2	1505.84	-4.6305	0
tVSYTEQk	1	2	1	W5PMM7	N-Term(iTRAQ8plex); K8(iTRAQ8plex)	0.553122	1		0.496709	1		0.304853	1		0.328385	1		0.277552	1		8.56	2	1563.88	0.309257	0
gAVLLP	1	1	1	F1RQD2	N-Term(iTRAQ8plex)	1.54433	1		1.92038	1		1.83708	1		1.78057	1		1.33361	1		3.26	2	873.572	1.22469	0
gLLLDTSR	2	12	1	L8IEA1	N-Term(iTRAQ8plex)	1.00029	1		0.732517	1		0.970596	1		1.06816	1		1.2921	1		2.48	2	1178.7	-2.09151	0
vFTVDHk	2	5	2	W5NRI1;Q2UVX4	N-Term(iTRAQ8plex); K7(iTRAQ8plex)																24.56	3	1453.85	-5.2845	0
dLTDYLMk	2	58	1	A1E0X2	N-Term(iTRAQ8plex); K8(iTRAQ8plex)	0.722449	2	11.7345	1.25967	2	12.1601	0.806988	2	14.2583	0.67947	2	5.37064	0.863926	2	11.6589	22.81	3	1606.89	-4.63613	0
lNEISk	4	6	1	S9YG39	N-Term(iTRAQ8plex); K6(iTRAQ8plex)	1.01963	2	44.845	1.1306	2	36.9864	1.39735	2	42.9317	1.66528	2	37.3609	2.03324	2	37.7682	21.11	2	1311.8	-5.00944	0
aTEQLk	1	2	1	W5NX51	N-Term(iTRAQ8plex); K6(iTRAQ8plex)	1.15013	1		1.1581	1		1.6954	1		1.14227	1		1.32833	1		18.31	2	1297.79	-0.0590772	0
vGTQFIR	1	15	1	Q4GZT4	N-Term(iTRAQ8plex)	1.46247	1		1.63864	1		1.2932	1		1.00936	1		1.15563	1		18.25	2	1124.67	-2.55164	0
dAcGPLQk	1	4	1	A2AXH8	N-Term(iTRAQ8plex); C3(Carbamidomethyl); K8(iTRAQ8plex)	1.74106	1		2.00596	1		1.95359	1		1.21847	1		1.48571	1		17.49	2	1496.83	-3.43502	0
mVQVASR	1	4	2	W5PMT0;S9Y4T1	N-Term(iTRAQ8plex); M1(Oxidation)																14.68	2	1110.62	0.00799269	0
gLcLScR	2	21	1	A0FI82	N-Term(iTRAQ8plex); C3(Carbamidomethyl); C6(Carbamidomethyl)	1.52297	1		0.773818	1		1.06383	1		1.61261	1		1.52227	1		13.07	2	1169.6	-3.79488	0
yQLSVSk	1	6	1	A6QPX7	N-Term(iTRAQ8plex); K7(iTRAQ8plex)	0.635337	1		0.628821	1		0.662993	1		0.515831	1		0.459056	1		12.15	2	1432.86	-2.72286	0
lkDVPPk	2	7	1	W5PMT0	N-Term(iTRAQ8plex); K2(iTRAQ8plex); K7(iTRAQ8plex)	0.796445	2	40.632	0.696583	2	45.0663	0.610319	2	20.7691	0.588225	2	16.7793	0.616065	2	17.6359	11.21	3	1709.11	-0.453407	1
eQISSGNDMVEEGAAk	1	2	1	B3VF96	N-Term(iTRAQ8plex); K16(iTRAQ8plex)	2.10275	1		2.7374	1		2.522	1		4.0302	1		1.27415	1		10.18	2	2273.14	-6.40938	0
scQDQPTxMAR	1	1	1	D2SZA9	N-Term(iTRAQ8plex); C2(Carbamidomethyl); X8(W)	1.52226	1		1.65441	1		1.8362	1		2.15335	1		2.86726	1		9.7	2	1683.77	-8.92056	0
lAFTSTEWMLESTV	1	2	1	F1SEH3	N-Term(iTRAQ8plex)	1.21034	1		1.12695	1		1.18762	1		1.53133	1		1.6932	1		8.18	2	1918.98	-1.18607	0
lFQPTHk	1	8	1	Q9MZY2	N-Term(iTRAQ8plex); K7(iTRAQ8plex)	1.34813	1		1.48595	1		2.00196	1		1.52816	1		1.78849	1		6.12	3	1478.89	-0.313757	0
sSAQILQWQVLSNTVPAk	1	2	1	B6CXY7	N-Term(iTRAQ8plex); K18(iTRAQ8plex)	1.14361	1		0.897687	1		1.42221	1		1.63269	1		1.89532	1		5.92	3	2578.44	-17.7038	0
eLYGNGYWALTPLRTPLPLAGPPR	1	7	1	Q2TJL6	N-Term(iTRAQ8plex)	0.897325	1		0.895156	1		0.898917	1		1.0363	1		0.787317	1		4.32	3	2956.63	-3.23268	1
lASVSHWLcSkPPk	1	1	1	E1BFQ0	N-Term(iTRAQ8plex); C9(Carbamidomethyl); K11(iTRAQ8plex); K14(iTRAQ8plex)	1.20746	1		0.28263	1		0.573971	1		0.552502	1		0.810156	1		1.54	5	2522.45	-7.30741	0
aAHGVk	2	5	2	W5PMT0;S9Y4T1	N-Term(iTRAQ8plex); K6(iTRAQ8plex)																29.19	3	1190.74	-2.70461	0
vDAEVWk	2	3	2	W5PGE9;L8HP94	N-Term(iTRAQ8plex); K7(iTRAQ8plex)																24.99	3	1454.84	-4.60327	0
eDLISk	6	6	1	A5JSS7	N-Term(iTRAQ8plex); K6(iTRAQ8plex)	1.7716	3	14.7043	1.31726	3	0.768196	1.47742	3	15.7115	3.35433	3	7.93919	4.2896	3	7.58383	23.35	2	1312.78	-7.52486	0
vLASSAR	1	5	3	P14639;P02769;X2GM95	N-Term(iTRAQ8plex)																21.64	2	1007.61	-0.920947	0
tQSFVAk	1	8	1	W5PMT0	N-Term(iTRAQ8plex); K7(iTRAQ8plex)	0.902261	1		0.989099	1		0.832973	1		1.01435	1		0.788773	1		21.53	2	1388.83	-3.54482	0
aADESER	1	34	1	L8HZM7	N-Term(iTRAQ8plex)	1.02802	1		1.51284	1		0.917414	1		0.79328	1		0.927324	1		20.57	2	1081.54	0.818645	0
vDIGLIk	1	11	2	W5P0Q4;B6D985	N-Term(iTRAQ8plex); K7(iTRAQ8plex)																19.77	3	1365.89	0.894039	0
lTEEEk	1	10	3	E7BQS5;P04654;E7BQS3	N-Term(iTRAQ8plex); K6(iTRAQ8plex)																18.57	2	1356.78	-4.91349	0
iIGGFLDAk	2	2	0		N-Term(iTRAQ8plex); K9(iTRAQ8plex)																17.56	3	1541.95	0.180854	0
mLGVPVNR	1	8	1	W5PMT0	N-Term(iTRAQ8plex); M1(Oxidation)	0.748112	1		1.29917	1		0.686368	1		0.771025	1		0.652834	1		16.32	2	1205.7	-0.619738	0
lLIYYATR	1	1	1	W5QHZ8	N-Term(iTRAQ8plex)	0.206569	1		0.201063	1		0.0956722	1		0.114813	1		0.0748841	1		13.61	2	1316.79	-0.433013	0
eLLEFVGSLGGPR	1	3	1	A7YVI7	N-Term(iTRAQ8plex)	1.55292	1		1.05794	1		1.63041	1		1.98746	1		1.84658	1		12.59	2	1677.94	-5.15322	0
sPAQTLQWQVLPNxVPAk	1	3	1	D2SZE3	N-Term(iTRAQ8plex); X14(H); K18(iTRAQ8plex)	1.25803	1		2.8532	1		1.8213	1		1.9864	1		2.34674	1		11.73	2	2622.45	-19.5751	0
qAVEEPR	2	3	1	W5PWM0	N-Term(iTRAQ8plex)	0.941844	2	5.15754	0.662069	2	14.4843	0.653314	2	24.7727	0.694694	2	33.6313	0.718638	2	31.8111	9.82	2	1132.62	-5.5151	0
vLQTTPGSPIR	1	1	1	W5PH95	N-Term(iTRAQ8plex)	1.4085	1		0.408075	1		0.40503	1		0.392031	1		0.271684	1		9.28	2	1472.86	-6.07356	0
lTQPTSVSVALGQTAk	1	1	1	A6QM09	N-Term(iTRAQ8plex); K16(iTRAQ8plex)	0.697522	1		0.884825	1		0.823734	1		0.588698	1		0.607681	1		8.63	3	2209.3	-2.7942	0
scQDQPTxmAR	1	1	1	D2SZA9	N-Term(iTRAQ8plex); C2(Carbamidomethyl); X8(N); M9(Oxidation)	1.70362	1		1.5668	1		1.80423	1		1.8774	1		2.33518	1		7.6	2	1627.75	0.503784	0
sVTGGYVYR	1	9	1	E1BGX8	N-Term(iTRAQ8plex)	1.1502	1		0.966209	1		1.30049	1		1.4063	1		1.32054	1		7.52	2	1305.7	-5.57455	0
tVFDEAIR	1	12	1	I3LFI0	N-Term(iTRAQ8plex)	1.12261	1		0.643286	1		0.5726	1		0.520205	1		0.502692	1		4.32	2	1254.69	-6.28307	0
kAQDFQGR	1	5	2	W5P9V5;A6QNW3	N-Term(iTRAQ8plex); K1(iTRAQ8plex)																3.5	2	1557.89	-3.19447	1
gESAGLVTATGR	1	1	1	W5NRG7	N-Term(iTRAQ8plex)	1.54432	1		1.76815	1		0.732777	1		0.768003	1		0.69848	1		24.73	2	1422.78	-1.37508	0
eELDTNk	1	1	1	W5PSQ7	N-Term(iTRAQ8plex); K7(iTRAQ8plex)	0.65234	1		0.569598	1		0.626317	1		0.926536	1		1.26766	1		22.91	2	1456.8	-5.70548	0
iLALDFNk	2	2	0		N-Term(iTRAQ8plex); K8(iTRAQ8plex)																17.56	3	1541.95	0.187339	0
iLFDNAIk	2	2	0		N-Term(iTRAQ8plex); K8(iTRAQ8plex)																17.56	3	1541.95	0.187339	0
iLQAVFDk	2	2	0		N-Term(iTRAQ8plex); K8(iTRAQ8plex)																17.56	3	1541.95	0.187339	0
aGIALNDNFVk	1	4	1	Q2KJE5	N-Term(iTRAQ8plex); K11(iTRAQ8plex)	0.592176	1		0.854299	1		0.817	1		1.07357	1		1.07003	1		14.54	2	1770.02	-9.03244	0
fDPVEGk	3	1	1	W5QAB1	N-Term(iTRAQ8plex); K7(iTRAQ8plex)	0.973755	3	9.41892	1.27448	3	8.85597	1.34147	3	4.52716	0.743772	3	4.8389	0.643105	3	6.73053	14.09	3	1399.81	0.879936	0
aGAPGk	2	6	1	F1RZT2	N-Term(iTRAQ8plex); K6(iTRAQ8plex)	0.52819	2	17.274	0.49297	2	23.2401	0.870883	2	102.722	0.644516	2	30.7059	0.710838	2	69.8367	11.35	3	1108.69	-2.11607	0
hPHPHLAFmAIPPkk	1	1	1	Q9N258	N-Term(iTRAQ8plex); M9(Oxidation); K14(iTRAQ8plex); K15(iTRAQ8plex)																9.97	5	2649.56	2.5503	1
mLENLLSESk	1	5	1	I3LBB1	N-Term(iTRAQ8plex); M1(Oxidation); K10(iTRAQ8plex)	0.327355	1		1.1881	1		1.31237	1		1.61573	1		0.604954	1		6.29	2	1788	0.681151	0
sAISkPk	1	1	1	W5NXW9	N-Term(iTRAQ8plex); K5(iTRAQ8plex); K7(iTRAQ8plex)	0.510677	1		0.382416	1		0.355048	1		0.356207	1		0.406434	1		4.61	2	1643.06	-1.9719	0
mAIPPk	2	1	1	V5RMG9	N-Term(iTRAQ8plex); K6(iTRAQ8plex)	2.54896	2	11.7765	1.87753	2	11.6216	2.57218	2	6.64611	6.02087	2	16.854	5.09186	2	13.0554	26.07	2	1264.79	-2.36718	0
gVcQQGTR	1	1	1	W5PE92	N-Term(iTRAQ8plex); C3(Carbamidomethyl)	1.22848	1		0.776809	1		1.05874	1		1.16589	1		1.12141	1		23.8	2	1209.63	0.989158	0
emxFPk	4	39	6	P11839;Q9TSI0;D7NJ85;J9UHS4;Q155X5;Q6UN62	N-Term(iTRAQ8plex); M2(Oxidation); X3(P); K6(iTRAQ8plex)																19.66	3	1372.76	-8.37369	0
dIVYVGxITIGTP	2	1	1	P80933	N-Term(iTRAQ8plex); X7(G)	1.05824	2	38.9148	1.19078	2	11.6388	1.42672	2	14.1331	1.72677	2	0.183253	2.02966	2	33.0079	19.52	2	1608.89	-16.7521	0
eSAAPPk	1	1	0		N-Term(iTRAQ8plex); K7(iTRAQ8plex)																18.8	3	1307.77	-8.10823	0
lLDSLPEDTR	1	5	1	W5PJZ2	N-Term(iTRAQ8plex)	0.834714	1		1.0572	1		2.09462	1		1.36774	1		0.89242	1		15.36	2	1462.8	-0.947873	0
lIPETLTR	1	2	1	W5NXP3	N-Term(iTRAQ8plex)	1.00751	1		1.16466	1		1.45024	1		0.813805	1		0.947999	1		14.88	3	1246.77	-1.13818	0
lLVPGTQITLSP	1	2	1	L8HLB7	N-Term(iTRAQ8plex)	0.657014	1		0.830694	1		1.2949	1		1.58173	1		1.51838	1		12.13	2	1542.93	-5.08791	0
sSQYYAR	1	4	1	W5PMT0	N-Term(iTRAQ8plex)	0.726404	1		0.667404	1		0.558215	1		0.643722	1		0.491016	1		11.71	2	1178.6	-9.38769	0
nIVEILR	1	1	1	W5Q5H8	N-Term(iTRAQ8plex)	1.66794	1		1.83587	1		1.86302	1		1.24543	1		2.18912	1		8.67	2	1160.73	-1.86281	0
aGHGLSGmPGRMTk	1	1	1	L8HVC5	N-Term(iTRAQ8plex); M8(Oxidation); K14(iTRAQ8plex)	1.40395	1		1.51934	1		2.64305	1		2.48354	1		2.16081	1		7.85	3	2024.1	1.66188	1
rALISYP	1	1	1	S9WML5	N-Term(iTRAQ8plex)	0.83479	1		1.10079	1		1.33438	1		1.16852	1		1.40166	1		5.85	2	1123.68	-0.688649	1
iSHELDSVSSEVN	1	2	1	Q9XSY9	N-Term(iTRAQ8plex)	1.32285	1		0.945004	1		1.19414	1		1.2282	1		2.0353	1		4.52	2	1719.86	-3.55142	0
tAAALLDQxYEk	2	9	1	Q8HYW4	N-Term(iTRAQ8plex); X9(F); K12(iTRAQ8plex)	0.830479	1		0.665063	1		0.81951	1		1.10428	1		1.00233	1		30.75	3	1978.08	-14.4776	0
aHDYLR	1	4	1	S9Y6H1	N-Term(iTRAQ8plex)	1.0518	1		1.16361	1		1.14668	1		0.919647	1		0.955433	1		29.03	3	1078.59	-1.57669	0
aSVLIR	2	10	1	W5NPT7	N-Term(iTRAQ8plex)	1.04545	1		0.775549	1		0.954748	1		0.924141	1		1.02553	1		23.46	2	962.628	-1.68992	0
vDSGPPk	2	2	1	I3LV27	N-Term(iTRAQ8plex); K7(iTRAQ8plex)	1.08972	2	12.6492	0.65069	2	4.74955	0.70502	2	22.7148	1.77102	2	16.4713	2.5517	2	16.9102	18.73	3	1307.76	-9.99844	0
aTVEDEk	1	10	1	P19120	N-Term(iTRAQ8plex); K7(iTRAQ8plex)	0.762449	1		0.891385	1		0.948428	1		0.919121	1		0.870258	1		11.97	2	1399.78	-8.13549	0
dISYLYR	1	4	1	L8IR26	N-Term(iTRAQ8plex)	1.26515	1		1.19563	1		1.28108	1		1.14921	1		1.07841	1		10.6	2	1233.68	-1.72686	0
qLDLSPDPk	1	1	1	I3LUR7	N-Term(iTRAQ8plex); K9(iTRAQ8plex)	1.59876	1		1.62622	1		1.06794	1		1.06111	1		1.20408	1		8.61	3	1620.92	-14.3691	0
lESDVSTQMEYcR	1	6	1	A6QPX7	N-Term(iTRAQ8plex); C12(Carbamidomethyl)	1.83242	1		2.35338	1		2.33911	1		2.13656	1		2.32629	1		4.42	2	1921.89	-2.30267	0
tVkPSEcS	1	10	5	W5PSQ7;A5PK72;Q1RMN8;A5PK49;A6QM09	N-Term(iTRAQ8plex); K3(iTRAQ8plex); C7(Carbamidomethyl)																3.22	2	1515.83	-1.25932	0
gPPAAmcLP	1	1	1	F1RPU4	N-Term(iTRAQ8plex); M6(Oxidation); C7(Carbamidomethyl)				2.55284	1		1.03807	1					1.41821	1		2.36	2	1233.61	-17.2126	0
